# Supplementary material
Source: MDPI journal article supplement (https://www.mdpi.com/2075-4655/1/2/8)
Supplement: s1 [file s1]

Archive with 9 entries (7 files):
- Supplementary/
- Supplementary/Engelhorn_et_al-SupplFig.pdf
- Supplementary/Tables-S1to6/
- Supplementary/Tables-S1to6/Table_S1.xls
- Supplementary/Tables-S1to6/Table_S2.xls
- Supplementary/Tables-S1to6/Table_S3.xls
- Supplementary/Tables-S1to6/Table_S4.xls
- Supplementary/Tables-S1to6/Table_S5.xls
- Supplementary/Tables-S1to6/Table_S6.xls
