# Supplementary material
Source: MDPI journal article supplement (https://www.mdpi.com/2075-4655/1/2/8)
Supplement: s1 [file s1 › Supplementary/Tables-S1to6/Table_S1.xls]

## Sheet: Sheet1
	L_t0	L_t2	L_I	t0_t2	t0_I	t2_I	No of conditions changed
AT1G01060	0	-1	0	0	0	0	1
AT1G01090	0	0	0	0	1	0	1
AT1G01200	0	0	0	0	0	1	1
AT1G01250	0	0	0	0	1	0	1
AT1G01390	0	0	-1	0	0	0	1
AT1G01450	0	-1	0	0	0	0	1
AT1G01610	0	0	1	0	0	0	1
AT1G01730	0	0	0	0	0	-1	1
AT1G01800	0	0	-1	0	0	0	1
AT1G01980	0	0	1	0	0	0	1
AT1G02000	0	0	0	0	1	0	1
AT1G02040	0	0	0	0	0	1	1
AT1G02090	0	1	0	0	0	0	1
AT1G02140	0	1	0	0	0	0	1
AT1G02280	0	0	1	0	0	0	1
AT1G02460	-1	0	0	0	0	0	1
AT1G02620	0	0	-1	0	0	0	1
AT1G02750	0	0	-1	0	0	0	1
AT1G02770	0	0	1	0	0	0	1
AT1G02816	-1	0	0	0	0	0	1
AT1G02830	0	0	1	0	0	0	1
AT1G02950	-1	0	0	0	0	0	1
AT1G03020	0	0	-1	0	0	0	1
AT1G03040	0	0	0	0	0	-1	1
AT1G03050	0	0	1	0	0	0	1
AT1G03080	-1	0	0	0	0	0	1
AT1G03190	0	1	0	0	0	0	1
AT1G03200	0	0	-1	0	0	0	1
AT1G03280	0	0	0	0	0	-1	1
AT1G03320	0	0	0	0	1	0	1
AT1G03330	0	1	0	0	0	0	1
AT1G03350	-1	0	0	0	0	0	1
AT1G03445	0	0	1	0	0	0	1
AT1G03550	0	0	-1	0	0	0	1
AT1G03660	0	0	1	0	0	0	1
AT1G03760	1	0	0	0	0	0	1
AT1G04110	0	0	1	0	0	0	1
AT1G04530	0	0	-1	0	0	0	1
AT1G04645	0	0	1	0	0	0	1
AT1G04890	0	0	0	0	0	1	1
AT1G05040	0	0	0	0	1	0	1
AT1G05055	0	1	0	0	0	0	1
AT1G05080	0	0	1	0	0	0	1
AT1G05200	-1	0	0	0	0	0	1
AT1G05310	-1	0	0	0	0	0	1
AT1G05360	0	0	1	0	0	0	1
AT1G05570	-1	0	0	0	0	0	1
AT1G05577	0	0	0	0	0	1	1
AT1G05790	0	-1	0	0	0	0	1
AT1G05860	0	1	0	0	0	0	1
AT1G05920	0	0	0	0	1	0	1
AT1G05930	0	0	1	0	0	0	1
AT1G06280	0	0	0	0	1	0	1
AT1G06310	0	0	0	0	0	-1	1
AT1G06540	0	0	0	0	1	0	1
AT1G06620	0	0	0	0	0	1	1
AT1G06910	0	1	0	0	0	0	1
AT1G06960	0	0	1	0	0	0	1
AT1G06980	0	0	0	0	0	1	1
AT1G07210	0	1	0	0	0	0	1
AT1G07340	0	0	1	0	0	0	1
AT1G07795	0	0	0	0	0	1	1
AT1G07900	0	0	-1	0	0	0	1
AT1G08090	-1	0	0	0	0	0	1
AT1G08140	0	0	1	0	0	0	1
AT1G08190	-1	0	0	0	0	0	1
AT1G08420	0	-1	0	0	0	0	1
AT1G08440	0	0	0	0	0	-1	1
AT1G08695	0	0	0	0	0	1	1
AT1G08845	0	1	0	0	0	0	1
AT1G08940	0	0	-1	0	0	0	1
AT1G09240	0	0	-1	0	0	0	1
AT1G09320	1	0	0	0	0	0	1
AT1G09460	0	0	1	0	0	0	1
AT1G09490	0	0	-1	0	0	0	1
AT1G09530	0	0	-1	0	0	0	1
AT1G10070	0	0	0	0	0	1	1
AT1G10210	0	0	-1	0	0	0	1
AT1G10220	0	0	1	0	0	0	1
AT1G10585	0	-1	0	0	0	0	1
AT1G10660	0	-1	0	0	0	0	1
AT1G10700	0	-1	0	0	0	0	1
AT1G10770	0	0	1	0	0	0	1
AT1G10850	0	1	0	0	0	0	1
AT1G10970	0	0	1	0	0	0	1
AT1G11070	0	0	0	0	0	1	1
AT1G11200	0	0	-1	0	0	0	1
AT1G11390	0	0	0	0	0	1	1
AT1G11430	0	0	0	0	0	1	1
AT1G11720	0	0	-1	0	0	0	1
AT1G11785	0	0	-1	0	0	0	1
AT1G11890	0	0	-1	0	0	0	1
AT1G11925	-1	0	0	0	0	0	1
AT1G11990	0	0	1	0	0	0	1
AT1G12020	0	0	0	0	0	-1	1
AT1G12060	-1	0	0	0	0	0	1
AT1G12070	0	0	0	0	0	1	1
AT1G12100	0	0	0	0	-1	0	1
AT1G12310	0	1	0	0	0	0	1
AT1G12460	0	0	1	0	0	0	1
AT1G12580	0	0	-1	0	0	0	1
AT1G12790	0	-1	0	0	0	0	1
AT1G12800	0	-1	0	0	0	0	1
AT1G12950	0	0	1	0	0	0	1
AT1G12970	-1	0	0	0	0	0	1
AT1G13040	1	0	0	0	0	0	1
AT1G13230	0	0	0	0	1	0	1
AT1G13370	0	0	0	0	1	0	1
AT1G13520	0	0	-1	0	0	0	1
AT1G13530	0	0	-1	0	0	0	1
AT1G13550	0	0	-1	0	0	0	1
AT1G13609	-1	0	0	0	0	0	1
AT1G13650	0	-1	0	0	0	0	1
AT1G13680	0	0	1	0	0	0	1
AT1G13810	0	1	0	0	0	0	1
AT1G13830	0	0	-1	0	0	0	1
AT1G13890	0	0	0	0	0	1	1
AT1G13910	0	0	1	0	0	0	1
AT1G14090	1	0	0	0	0	0	1
AT1G14170	0	0	0	0	-1	0	1
AT1G14182	0	0	1	0	0	0	1
AT1G14230	-1	0	0	0	0	0	1
AT1G14270	0	-1	0	0	0	0	1
AT1G14330	-1	0	0	0	0	0	1
AT1G14370	0	0	-1	0	0	0	1
AT1G14460	0	1	0	0	0	0	1
AT1G14470	1	0	0	0	0	0	1
AT1G14560	-1	0	0	0	0	0	1
AT1G14755	0	0	0	0	0	1	1
AT1G14930	-1	0	0	0	0	0	1
AT1G15020	0	-1	0	0	0	0	1
AT1G15210	0	0	0	0	1	0	1
AT1G15300	0	0	1	0	0	0	1
AT1G15740	0	-1	0	0	0	0	1
AT1G15772	0	0	0	0	0	1	1
AT1G15800	0	0	-1	0	0	0	1
AT1G15950	0	0	-1	0	0	0	1
AT1G15960	0	0	-1	0	0	0	1
AT1G16400	0	0	-1	0	0	0	1
AT1G16460	0	0	-1	0	0	0	1
AT1G16515	0	-1	0	0	0	0	1
AT1G16910	0	0	0	0	1	0	1
AT1G17145	0	-1	0	0	0	0	1
AT1G17370	0	0	0	0	-1	0	1
AT1G17650	0	0	0	0	0	1	1
AT1G17710	0	0	0	0	0	1	1
AT1G17820	-1	0	0	0	0	0	1
AT1G17980	0	0	-1	0	0	0	1
AT1G18180	1	0	0	0	0	0	1
AT1G18260	0	-1	0	0	0	0	1
AT1G18485	0	-1	0	0	0	0	1
AT1G18580	-1	0	0	0	0	0	1
AT1G18610	0	1	0	0	0	0	1
AT1G18750	0	-1	0	0	0	0	1
AT1G18860	-1	0	0	0	0	0	1
AT1G18960	0	0	0	0	0	1	1
AT1G18980	0	-1	0	0	0	0	1
AT1G19030	0	0	0	0	1	0	1
AT1G19040	0	0	1	0	0	0	1
AT1G19060	0	0	0	0	1	0	1
AT1G19115	0	0	0	0	1	0	1
AT1G19210	0	0	-1	0	0	0	1
AT1G19350	0	0	-1	0	0	0	1
AT1G19376	0	0	0	0	-1	0	1
AT1G19600	0	0	0	0	0	1	1
AT1G19610	0	0	-1	0	0	0	1
AT1G19835	-1	0	0	0	0	0	1
AT1G20030	0	0	1	0	0	0	1
AT1G20100	0	0	-1	0	0	0	1
AT1G20110	0	0	-1	0	0	0	1
AT1G20160	0	0	0	0	0	-1	1
AT1G20180	0	0	0	0	0	1	1
AT1G20657	0	0	1	0	0	0	1
AT1G20691	1	0	0	0	0	0	1
AT1G20730	0	0	1	0	0	0	1
AT1G20795	0	0	0	0	1	0	1
AT1G21100	0	0	-1	0	0	0	1
AT1G21220	0	0	0	-1	0	0	1
AT1G21240	0	0	-1	0	0	0	1
AT1G21245	-1	0	0	0	0	0	1
AT1G21300	0	0	1	0	0	0	1
AT1G21326	0	0	-1	0	0	0	1
AT1G21440	-1	0	0	0	0	0	1
AT1G21600	0	-1	0	0	0	0	1
AT1G21770	0	-1	0	0	0	0	1
AT1G21950	0	0	1	0	0	0	1
AT1G22010	0	0	0	0	0	1	1
AT1G22015	0	0	0	0	0	1	1
AT1G22150	0	0	1	0	0	0	1
AT1G22610	-1	0	0	0	0	0	1
AT1G22770	0	-1	0	0	0	0	1
AT1G23070	0	0	1	0	0	0	1
AT1G23120	0	0	-1	0	0	0	1
AT1G23190	-1	0	0	0	0	0	1
AT1G23200	0	0	-1	0	0	0	1
AT1G23330	0	0	1	0	0	0	1
AT1G23480	0	-1	0	0	0	0	1
AT1G23520	0	0	0	0	0	1	1
AT1G23590	0	0	1	0	0	0	1
AT1G23600	0	0	1	0	0	0	1
AT1G23730	0	0	0	0	1	0	1
AT1G23770	0	0	1	0	0	0	1
AT1G23810	0	0	1	0	0	0	1
AT1G23900	0	-1	0	0	0	0	1
AT1G23980	0	1	0	0	0	0	1
AT1G24190	0	0	-1	0	0	0	1
AT1G24220	0	0	1	0	0	0	1
AT1G24250	0	0	0	0	0	1	1
AT1G24330	1	0	0	0	0	0	1
AT1G24540	0	0	0	0	0	1	1
AT1G25450	0	0	0	0	0	1	1
AT1G25470	0	0	1	0	0	0	1
AT1G25530	0	0	0	0	-1	0	1
AT1G26150	0	0	0	0	0	1	1
AT1G26160	0	-1	0	0	0	0	1
AT1G26270	0	0	0	0	-1	0	1
AT1G26380	0	0	-1	0	0	0	1
AT1G26390	-1	0	0	0	0	0	1
AT1G26420	0	-1	0	0	0	0	1
AT1G26440	0	0	-1	0	0	0	1
AT1G26480	0	0	0	0	0	1	1
AT1G26515	0	0	1	0	0	0	1
AT1G26530	1	0	0	0	0	0	1
AT1G26640	0	1	0	0	0	0	1
AT1G26700	0	0	1	0	0	0	1
AT1G26720	0	0	1	0	0	0	1
AT1G26761	0	-1	0	0	0	0	1
AT1G26780	0	0	0	0	-1	0	1
AT1G26890	0	0	1	0	0	0	1
AT1G27050	1	0	0	0	0	0	1
AT1G27240	0	0	0	0	0	1	1
AT1G27270	0	0	1	0	0	0	1
AT1G27330	0	0	-1	0	0	0	1
AT1G27461	1	0	0	0	0	0	1
AT1G27660	1	0	0	0	0	0	1
AT1G27670	0	-1	0	0	0	0	1
AT1G27720	1	0	0	0	0	0	1
AT1G27752	0	-1	0	0	0	0	1
AT1G28050	0	0	-1	0	0	0	1
AT1G28350	1	0	0	0	0	0	1
AT1G28440	0	1	0	0	0	0	1
AT1G28510	0	-1	0	0	0	0	1
AT1G28685	0	-1	0	0	0	0	1
AT1G28695	0	0	1	0	0	0	1
AT1G28730	0	0	0	0	0	1	1
AT1G29010	0	0	1	0	0	0	1
AT1G29050	-1	0	0	0	0	0	1
AT1G29160	0	-1	0	0	0	0	1
AT1G29240	0	0	-1	0	0	0	1
AT1G29310	0	0	1	0	0	0	1
AT1G29600	0	-1	0	0	0	0	1
AT1G29860	-1	0	0	0	0	0	1
AT1G29930	0	0	0	0	0	1	1
AT1G29970	0	-1	0	0	0	0	1
AT1G30135	0	0	0	-1	0	0	1
AT1G30280	0	-1	0	0	0	0	1
AT1G30350	0	0	0	0	0	1	1
AT1G30410	0	0	-1	0	0	0	1
AT1G30460	1	0	0	0	0	0	1
AT1G30520	0	0	0	0	0	1	1
AT1G30720	0	0	-1	0	0	0	1
AT1G30845	1	0	0	0	0	0	1
AT1G30860	0	0	-1	0	0	0	1
AT1G31070	0	0	1	0	0	0	1
AT1G31440	-1	0	0	0	0	0	1
AT1G31830	0	1	0	0	0	0	1
AT1G31850	1	0	0	0	0	0	1
AT1G31910	0	0	0	0	0	-1	1
AT1G31970	1	0	0	0	0	0	1
AT1G32049	0	0	0	0	0	1	1
AT1G32120	0	0	1	0	0	0	1
AT1G32180	0	0	0	0	0	1	1
AT1G32250	0	0	1	0	0	0	1
AT1G32350	0	0	-1	0	0	0	1
AT1G32640	0	0	-1	0	0	0	1
AT1G32690	-1	0	0	0	0	0	1
AT1G32860	0	0	0	0	0	-1	1
AT1G32910	1	0	0	0	0	0	1
AT1G33060	0	0	0	0	-1	0	1
AT1G33420	0	1	0	0	0	0	1
AT1G33430	0	0	1	0	0	0	1
AT1G33480	0	1	0	0	0	0	1
AT1G33607	0	-1	0	0	0	0	1
AT1G33720	0	0	-1	0	0	0	1
AT1G34370	0	0	-1	0	0	0	1
AT1G34580	0	0	1	0	0	0	1
AT1G35230	0	0	-1	0	0	0	1
AT1G35260	0	0	-1	0	0	0	1
AT1G35310	0	0	1	0	0	0	1
AT1G36020	0	0	1	0	0	0	1
AT1G36070	-1	0	0	0	0	0	1
AT1G36150	0	0	1	0	0	0	1
AT1G36180	0	1	0	0	0	0	1
AT1G36620	0	0	-1	0	0	0	1
AT1G36680	0	-1	0	0	0	0	1
AT1G36732	0	0	-1	0	0	0	1
AT1G37150	0	0	0	0	0	1	1
AT1G42560	0	0	0	0	1	0	1
AT1G42960	-1	0	0	0	0	0	1
AT1G42980	-1	0	0	0	0	0	1
AT1G43040	0	0	0	0	0	1	1
AT1G43640	0	0	1	0	0	0	1
AT1G43700	0	0	-1	0	0	0	1
AT1G44191	0	0	0	0	0	1	1
AT1G44224	0	0	1	0	0	0	1
AT1G44820	0	0	-1	0	0	0	1
AT1G44890	0	0	1	0	0	0	1
AT1G44940	0	0	0	0	0	1	1
AT1G45110	1	0	0	0	0	0	1
AT1G45249	0	0	-1	0	0	0	1
AT1G47310	0	-1	0	0	0	0	1
AT1G47405	0	0	1	0	0	0	1
AT1G47640	0	1	0	0	0	0	1
AT1G47780	0	1	0	0	0	0	1
AT1G47840	0	0	0	0	0	1	1
AT1G47860	-1	0	0	0	0	0	1
AT1G48230	0	1	0	0	0	0	1
AT1G48400	0	0	0	0	0	1	1
AT1G48530	0	0	0	0	0	1	1
AT1G48540	-1	0	0	0	0	0	1
AT1G48650	0	0	0	0	-1	0	1
AT1G48660	0	0	1	0	0	0	1
AT1G48820	0	0	0	0	0	1	1
AT1G49120	0	0	0	0	1	0	1
AT1G49200	0	-1	0	0	0	0	1
AT1G49210	0	-1	0	0	0	0	1
AT1G49405	0	0	1	0	0	0	1
AT1G49790	1	0	0	0	0	0	1
AT1G49820	0	0	-1	0	0	0	1
AT1G49900	0	0	0	0	1	0	1
AT1G50260	0	0	-1	0	0	0	1
AT1G50300	1	0	0	0	0	0	1
AT1G50370	0	1	0	0	0	0	1
AT1G50440	-1	0	0	0	0	0	1
AT1G50450	0	-1	0	0	0	0	1
AT1G50520	-1	0	0	0	0	0	1
AT1G50570	0	0	-1	0	0	0	1
AT1G50610	0	0	0	0	0	1	1
AT1G50740	0	0	-1	0	0	0	1
AT1G50820	0	0	0	0	0	1	1
AT1G51140	-1	0	0	0	0	0	1
AT1G51405	0	1	0	0	0	0	1
AT1G51538	0	0	0	0	-1	0	1
AT1G51790	0	0	-1	0	0	0	1
AT1G51920	0	-1	0	0	0	0	1
AT1G51950	0	0	-1	0	0	0	1
AT1G52080	0	0	-1	0	0	0	1
AT1G52085	1	0	0	0	0	0	1
AT1G52240	0	0	1	0	0	0	1
AT1G52680	0	0	0	0	0	1	1
AT1G52800	0	0	-1	0	0	0	1
AT1G52830	0	0	-1	0	0	0	1
AT1G52980	1	0	0	0	0	0	1
AT1G53023	0	0	0	0	0	1	1
AT1G53090	0	0	-1	0	0	0	1
AT1G53542	0	1	0	0	0	0	1
AT1G53640	0	0	1	0	0	0	1
AT1G53780	0	-1	0	0	0	0	1
AT1G53820	0	0	0	0	1	0	1
AT1G53840	0	-1	0	0	0	0	1
AT1G54070	0	0	1	0	0	0	1
AT1G54240	0	0	1	0	0	0	1
AT1G54300	0	0	0	0	1	0	1
AT1G54420	1	0	0	0	0	0	1
AT1G54540	0	0	1	0	0	0	1
AT1G54870	0	0	0	0	0	1	1
AT1G54940	0	0	1	0	0	0	1
AT1G54990	0	1	0	0	0	0	1
AT1G55020	0	0	1	0	0	0	1
AT1G55050	0	0	1	0	0	0	1
AT1G55230	0	0	-1	0	0	0	1
AT1G55320	0	0	1	0	0	0	1
AT1G55350	1	0	0	0	0	0	1
AT1G55410	0	0	1	0	0	0	1
AT1G55540	1	0	0	0	0	0	1
AT1G55928	0	0	1	0	0	0	1
AT1G56030	0	0	1	0	0	0	1
AT1G56200	0	-1	0	0	0	0	1
AT1G56230	0	0	0	0	0	-1	1
AT1G56242	0	-1	0	0	0	0	1
AT1G56250	0	0	0	0	0	1	1
AT1G56280	0	-1	0	0	0	0	1
AT1G56360	0	0	1	0	0	0	1
AT1G57620	0	1	0	0	0	0	1
AT1G57980	0	0	-1	0	0	0	1
AT1G58122	0	0	1	0	0	0	1
AT1G58190	0	0	-1	0	0	0	1
AT1G59600	0	0	0	0	-1	0	1
AT1G59670	0	0	0	0	0	-1	1
AT1G59990	0	0	1	0	0	0	1
AT1G60000	0	0	0	0	1	0	1
AT1G60030	0	0	1	0	0	0	1
AT1G60110	0	0	-1	0	0	0	1
AT1G60240	0	0	0	0	1	0	1
AT1G60340	0	0	1	0	0	0	1
AT1G60660	0	1	0	0	0	0	1
AT1G61030	0	-1	0	0	0	0	1
AT1G61180	0	0	0	0	-1	0	1
AT1G61215	0	1	0	0	0	0	1
AT1G61460	0	0	-1	0	0	0	1
AT1G61566	0	0	1	0	0	0	1
AT1G61590	0	0	0	0	1	0	1
AT1G61760	0	0	1	0	0	0	1
AT1G62020	0	1	0	0	0	0	1
AT1G62040	0	0	-1	0	0	0	1
AT1G62380	0	0	0	1	0	0	1
AT1G62420	0	-1	0	0	0	0	1
AT1G62430	0	-1	0	0	0	0	1
AT1G62490	0	0	0	0	-1	0	1
AT1G62680	0	1	0	0	0	0	1
AT1G62766	-1	0	0	0	0	0	1
AT1G62800	0	0	-1	0	0	0	1
AT1G63060	0	0	0	0	0	1	1
AT1G63105	0	0	0	0	1	0	1
AT1G63350	0	0	-1	0	0	0	1
AT1G63500	0	-1	0	0	0	0	1
AT1G63610	0	-1	0	0	0	0	1
AT1G63740	0	0	-1	0	0	0	1
AT1G63770	0	-1	0	0	0	0	1
AT1G63860	0	0	-1	0	0	0	1
AT1G63870	0	0	-1	0	0	0	1
AT1G63880	0	0	-1	0	0	0	1
AT1G63980	0	0	0	0	0	1	1
AT1G64030	0	0	1	0	0	0	1
AT1G64040	0	0	-1	0	0	0	1
AT1G64050	0	0	0	0	-1	0	1
AT1G64110	0	-1	0	0	0	0	1
AT1G64250	0	1	0	0	0	0	1
AT1G64320	0	0	1	0	0	0	1
AT1G64330	-1	0	0	0	0	0	1
AT1G64470	1	0	0	0	0	0	1
AT1G64780	0	0	1	0	0	0	1
AT1G64800	0	0	0	0	1	0	1
AT1G64820	1	0	0	0	0	0	1
AT1G65120	0	0	1	0	0	0	1
AT1G65170	0	0	1	0	0	0	1
AT1G65310	0	-1	0	0	0	0	1
AT1G65342	0	0	0	0	1	0	1
AT1G65385	0	0	1	0	0	0	1
AT1G65484	0	-1	0	0	0	0	1
AT1G65590	0	0	1	0	0	0	1
AT1G65810	0	1	0	0	0	0	1
AT1G65850	0	-1	0	0	0	0	1
AT1G65890	0	0	0	-1	0	0	1
AT1G65990	0	0	0	0	0	1	1
AT1G66020	0	-1	0	0	0	0	1
AT1G66040	0	0	1	0	0	0	1
AT1G66080	0	0	0	0	0	-1	1
AT1G66110	0	0	1	0	0	0	1
AT1G66130	0	-1	0	0	0	0	1
AT1G66890	0	-1	0	0	0	0	1
AT1G67090	0	0	0	0	0	1	1
AT1G67105	0	0	-1	0	0	0	1
AT1G67290	0	0	0	0	0	1	1
AT1G67300	0	0	-1	0	0	0	1
AT1G67310	0	0	-1	0	0	0	1
AT1G67460	0	0	0	0	0	1	1
AT1G67480	0	-1	0	0	0	0	1
AT1G67620	0	1	0	0	0	0	1
AT1G67720	0	1	0	0	0	0	1
AT1G67820	0	0	1	0	0	0	1
AT1G67920	0	0	-1	0	0	0	1
AT1G67960	0	-1	0	0	0	0	1
AT1G67980	0	0	-1	0	0	0	1
AT1G68000	0	0	-1	0	0	0	1
AT1G68020	0	0	0	0	1	0	1
AT1G68050	0	0	-1	0	0	0	1
AT1G68350	0	-1	0	0	0	0	1
AT1G68526	0	-1	0	0	0	0	1
AT1G68560	0	0	1	0	0	0	1
AT1G68610	0	0	1	0	0	0	1
AT1G68670	0	-1	0	0	0	0	1
AT1G68735	0	-1	0	0	0	0	1
AT1G68905	0	0	1	0	0	0	1
AT1G68930	1	0	0	0	0	0	1
AT1G69160	0	0	1	0	0	0	1
AT1G69252	0	0	-1	0	0	0	1
AT1G69295	0	0	0	0	0	-1	1
AT1G69560	0	0	0	0	1	0	1
AT1G69830	0	-1	0	0	0	0	1
AT1G69940	0	0	1	0	0	0	1
AT1G69960	0	0	-1	0	0	0	1
AT1G69970	-1	0	0	0	0	0	1
AT1G69990	0	0	0	0	1	0	1
AT1G70030	0	0	0	0	0	1	1
AT1G70170	0	0	0	0	0	1	1
AT1G70400	0	0	1	0	0	0	1
AT1G70460	0	1	0	0	0	0	1
AT1G70540	0	0	0	0	0	1	1
AT1G70590	0	0	-1	0	0	0	1
AT1G70670	0	0	0	0	1	0	1
AT1G70880	0	-1	0	0	0	0	1
AT1G70985	0	-1	0	0	0	0	1
AT1G71120	0	0	-1	0	0	0	1
AT1G71150	0	0	1	0	0	0	1
AT1G71280	0	0	0	0	0	1	1
AT1G71330	1	0	0	0	0	0	1
AT1G71390	0	0	-1	0	0	0	1
AT1G71410	0	-1	0	0	0	0	1
AT1G71680	0	0	0	0	0	1	1
AT1G71690	0	0	0	0	1	0	1
AT1G72000	0	0	-1	0	0	0	1
AT1G72010	0	0	-1	0	0	0	1
AT1G72050	0	1	0	0	0	0	1
AT1G72290	0	0	0	0	0	1	1
AT1G72470	-1	0	0	0	0	0	1
AT1G72645	0	-1	0	0	0	0	1
AT1G72870	0	-1	0	0	0	0	1
AT1G73325	0	0	0	0	1	0	1
AT1G73410	0	0	1	0	0	0	1
AT1G73510	0	0	1	0	0	0	1
AT1G73830	0	0	-1	0	0	0	1
AT1G73930	0	1	0	0	0	0	1
AT1G73950	0	0	0	0	-1	0	1
AT1G74220	0	0	1	0	0	0	1
AT1G74310	0	1	0	0	0	0	1
AT1G74330	0	-1	0	0	0	0	1
AT1G74510	0	1	0	0	0	0	1
AT1G74530	0	0	1	0	0	0	1
AT1G74630	1	0	0	0	0	0	1
AT1G74830	0	0	1	0	0	0	1
AT1G74840	0	-1	0	0	0	0	1
AT1G74890	1	0	0	0	0	0	1
AT1G75000	0	-1	0	0	0	0	1
AT1G75160	0	0	0	0	1	0	1
AT1G75190	0	1	0	0	0	0	1
AT1G75230	0	1	0	0	0	0	1
AT1G75430	0	0	0	1	0	0	1
AT1G75590	0	0	0	0	0	1	1
AT1G75600	0	0	0	0	1	0	1
AT1G75980	0	1	0	0	0	0	1
AT1G75990	0	1	0	0	0	0	1
AT1G76190	-1	0	0	0	0	0	1
AT1G76370	0	0	1	0	0	0	1
AT1G76890	0	-1	0	0	0	0	1
AT1G77360	1	0	0	0	0	0	1
AT1G77400	0	0	-1	0	0	0	1
AT1G77525	0	0	0	0	0	1	1
AT1G77992	-1	0	0	0	0	0	1
AT1G78030	-1	0	0	0	0	0	1
AT1G78240	0	-1	0	0	0	0	1
AT1G78300	0	1	0	0	0	0	1
AT1G78310	0	0	-1	0	0	0	1
AT1G78520	0	0	0	0	0	1	1
AT1G78550	0	0	-1	0	0	0	1
AT1G78810	0	1	0	0	0	0	1
AT1G79000	0	-1	0	0	0	0	1
AT1G79110	0	0	0	0	0	-1	1
AT1G79400	0	0	1	0	0	0	1
AT1G79670	0	0	-1	0	0	0	1
AT1G79760	0	1	0	0	0	0	1
AT1G79850	0	0	0	0	0	1	1
AT1G79860	0	0	0	0	0	1	1
AT1G79910	0	0	1	0	0	0	1
AT1G79950	1	0	0	0	0	0	1
AT1G80020	0	1	0	0	0	0	1
AT1G80325	-1	0	0	0	0	0	1
AT1G80420	0	-1	0	0	0	0	1
AT1G80470	0	0	1	0	0	0	1
AT1G80560	0	1	0	0	0	0	1
AT1G80840	0	0	-1	0	0	0	1
AT1G80865	0	0	1	0	0	0	1
AT1G80960	-1	0	0	0	0	0	1
AT2G01021	0	-1	0	0	0	0	1
AT2G01290	0	0	-1	0	0	0	1
AT2G01500	0	0	1	0	0	0	1
AT2G01530	-1	0	0	0	0	0	1
AT2G01800	0	1	0	0	0	0	1
AT2G01860	0	-1	0	0	0	0	1
AT2G02070	0	-1	0	0	0	0	1
AT2G02120	0	1	0	0	0	0	1
AT2G02130	0	0	0	0	0	1	1
AT2G02160	0	-1	0	0	0	0	1
AT2G02700	0	-1	0	0	0	0	1
AT2G02820	-1	0	0	0	0	0	1
AT2G02890	0	0	0	0	0	1	1
AT2G02970	0	-1	0	0	0	0	1
AT2G03000	0	0	0	0	1	0	1
AT2G03040	0	-1	0	0	0	0	1
AT2G03520	0	0	0	0	1	0	1
AT2G03550	0	0	-1	0	0	0	1
AT2G03770	-1	0	0	0	0	0	1
AT2G04020	0	0	0	0	1	0	1
AT2G04032	0	-1	0	0	0	0	1
AT2G04100	-1	0	0	0	0	0	1
AT2G04110	0	0	0	0	1	0	1
AT2G04135	0	0	0	0	0	1	1
AT2G04660	0	1	0	0	0	0	1
AT2G04910	0	0	0	0	1	0	1
AT2G05518	0	0	-1	0	0	0	1
AT2G05910	-1	0	0	0	0	0	1
AT2G05915	0	-1	0	0	0	0	1
AT2G05960	0	0	0	0	1	0	1
AT2G06002	0	0	-1	0	0	0	1
AT2G07680	0	0	0	0	0	1	1
AT2G07711	0	1	0	0	0	0	1
AT2G07739	1	0	0	0	0	0	1
AT2G12480	0	0	1	0	0	0	1
AT2G13116	0	0	0	0	0	1	1
AT2G13370	0	-1	0	0	0	0	1
AT2G13750	0	1	0	0	0	0	1
AT2G14095	0	0	0	0	0	1	1
AT2G14255	0	0	0	0	0	1	1
AT2G14378	0	0	0	0	0	1	1
AT2G14820	0	0	0	0	-1	0	1
AT2G15040	0	0	-1	0	0	0	1
AT2G15318	0	-1	0	0	0	0	1
AT2G15730	0	1	0	0	0	0	1
AT2G15790	0	1	0	0	0	0	1
AT2G16140	0	0	0	0	1	0	1
AT2G16220	0	0	1	0	0	0	1
AT2G16430	0	-1	0	0	0	0	1
AT2G16595	0	0	-1	0	0	0	1
AT2G16910	0	0	0	0	0	1	1
AT2G16980	0	0	1	0	0	0	1
AT2G17130	-1	0	0	0	0	0	1
AT2G17170	0	0	1	0	0	0	1
AT2G17230	0	1	0	0	0	0	1
AT2G17670	0	1	0	0	0	0	1
AT2G17740	0	-1	0	0	0	0	1
AT2G18060	0	1	0	0	0	0	1
AT2G18130	0	0	1	0	0	0	1
AT2G18160	1	0	0	0	0	0	1
AT2G18380	0	0	1	0	0	0	1
AT2G18710	0	-1	0	0	0	0	1
AT2G18780	0	1	0	0	0	0	1
AT2G18860	0	0	-1	0	0	0	1
AT2G18969	0	0	0	0	0	1	1
AT2G19070	0	0	1	0	0	0	1
AT2G19200	0	0	1	0	0	0	1
AT2G19400	0	0	0	0	0	1	1
AT2G19580	0	0	0	0	1	0	1
AT2G19700	0	0	0	0	1	0	1
AT2G19860	0	-1	0	0	0	0	1
AT2G20080	0	0	0	0	1	0	1
AT2G20140	0	1	0	0	0	0	1
AT2G20320	0	-1	0	0	0	0	1
AT2G20350	-1	0	0	0	0	0	1
AT2G20840	0	0	1	0	0	0	1
AT2G21045	0	1	0	0	0	0	1
AT2G21090	0	1	0	0	0	0	1
AT2G21100	0	0	0	0	1	0	1
AT2G21188	0	0	-1	0	0	0	1
AT2G21480	0	0	1	0	0	0	1
AT2G21490	0	0	1	0	0	0	1
AT2G21640	1	0	0	0	0	0	1
AT2G21730	0	0	1	0	0	0	1
AT2G21890	0	0	0	0	1	0	1
AT2G21900	-1	0	0	0	0	0	1
AT2G22030	0	0	1	0	0	0	1
AT2G22070	1	0	0	0	0	0	1
AT2G22080	0	1	0	0	0	0	1
AT2G22100	0	1	0	0	0	0	1
AT2G22170	0	0	0	0	0	1	1
AT2G22450	0	-1	0	0	0	0	1
AT2G22510	0	0	0	0	1	0	1
AT2G22620	0	1	0	0	0	0	1
AT2G22790	0	-1	0	0	0	0	1
AT2G22821	0	0	0	0	-1	0	1
AT2G22930	0	-1	0	0	0	0	1
AT2G22960	0	0	0	0	0	1	1
AT2G22970	0	-1	0	0	0	0	1
AT2G23290	0	1	0	0	0	0	1
AT2G23620	0	-1	0	0	0	0	1
AT2G23800	0	0	0	0	0	1	1
AT2G24000	0	0	1	0	0	0	1
AT2G24060	0	0	0	0	0	1	1
AT2G24070	0	0	0	0	-1	0	1
AT2G24150	0	0	1	0	0	0	1
AT2G24165	0	-1	0	0	0	0	1
AT2G24200	-1	0	0	0	0	0	1
AT2G24220	0	1	0	0	0	0	1
AT2G24270	0	0	0	0	0	1	1
AT2G24370	0	0	1	0	0	0	1
AT2G24420	0	0	-1	0	0	0	1
AT2G24545	0	-1	0	0	0	0	1
AT2G24660	0	0	1	0	0	0	1
AT2G25360	0	0	1	0	0	0	1
AT2G25450	0	0	-1	0	0	0	1
AT2G25470	0	0	-1	0	0	0	1
AT2G25480	0	1	0	0	0	0	1
AT2G25570	1	0	0	0	0	0	1
AT2G25600	0	0	1	0	0	0	1
AT2G25737	0	1	0	0	0	0	1
AT2G25930	0	-1	0	0	0	0	1
AT2G26170	0	0	-1	0	0	0	1
AT2G26267	1	0	0	0	0	0	1
AT2G26490	0	0	0	0	0	1	1
AT2G26610	0	0	0	0	1	0	1
AT2G26680	1	0	0	0	0	0	1
AT2G26730	0	1	0	0	0	0	1
AT2G26770	0	1	0	0	0	0	1
AT2G26940	0	0	0	0	1	0	1
AT2G26960	0	0	1	0	0	0	1
AT2G27100	0	1	0	0	0	0	1
AT2G27190	0	0	0	0	0	-1	1
AT2G27200	0	0	-1	0	0	0	1
AT2G27400	0	-1	0	0	0	0	1
AT2G27760	0	1	0	0	0	0	1
AT2G28040	0	1	0	0	0	0	1
AT2G28056	0	-1	0	0	0	0	1
AT2G28090	0	0	0	0	1	0	1
AT2G28190	0	0	0	0	0	1	1
AT2G28210	0	-1	0	0	0	0	1
AT2G28500	0	0	0	-1	0	0	1
AT2G28540	1	0	0	0	0	0	1
AT2G28650	-1	0	0	0	0	0	1
AT2G28680	0	0	1	0	0	0	1
AT2G28690	0	0	1	0	0	0	1
AT2G28830	0	-1	0	0	0	0	1
AT2G28870	0	0	1	0	0	0	1
AT2G28910	0	-1	0	0	0	0	1
AT2G29100	0	-1	0	0	0	0	1
AT2G29110	0	0	-1	0	0	0	1
AT2G29130	0	-1	0	0	0	0	1
AT2G29140	1	0	0	0	0	0	1
AT2G29160	0	0	-1	0	0	0	1
AT2G29350	0	0	-1	0	0	0	1
AT2G29380	1	0	0	0	0	0	1
AT2G29390	0	0	1	0	0	0	1
AT2G29430	0	0	0	0	1	0	1
AT2G29570	0	0	0	0	0	-1	1
AT2G29620	0	0	0	0	1	0	1
AT2G29700	-1	0	0	0	0	0	1
AT2G29750	-1	0	0	0	0	0	1
AT2G29800	0	0	0	0	1	0	1
AT2G29980	0	0	0	0	0	1	1
AT2G30010	0	0	1	0	0	0	1
AT2G30200	0	0	1	0	0	0	1
AT2G30230	0	0	-1	0	0	0	1
AT2G30420	-1	0	0	0	0	0	1
AT2G30766	-1	0	0	0	0	0	1
AT2G30770	0	0	-1	0	0	0	1
AT2G30840	0	0	-1	0	0	0	1
AT2G30890	0	1	0	0	0	0	1
AT2G30940	0	0	1	0	0	0	1
AT2G31010	0	0	1	0	0	0	1
AT2G31083	0	0	1	0	0	0	1
AT2G31150	1	0	0	0	0	0	1
AT2G31215	0	0	1	0	0	0	1
AT2G31500	0	0	1	0	0	0	1
AT2G31620	0	0	0	0	0	1	1
AT2G31720	0	0	1	0	0	0	1
AT2G31960	0	-1	0	0	0	0	1
AT2G32200	0	-1	0	0	0	0	1
AT2G32310	0	0	1	0	0	0	1
AT2G32360	0	0	1	0	0	0	1
AT2G32460	0	0	1	0	0	0	1
AT2G32650	0	0	0	0	0	1	1
AT2G32660	-1	0	0	0	0	0	1
AT2G32670	0	0	0	0	1	0	1
AT2G32680	0	0	-1	0	0	0	1
AT2G32710	1	0	0	0	0	0	1
AT2G32730	0	1	0	0	0	0	1
AT2G32970	-1	0	0	0	0	0	1
AT2G33180	0	-1	0	0	0	0	1
AT2G33190	0	0	0	0	0	1	1
AT2G33250	0	-1	0	0	0	0	1
AT2G33330	1	0	0	0	0	0	1
AT2G33400	0	1	0	0	0	0	1
AT2G33670	0	0	0	0	1	0	1
AT2G33775	0	0	1	0	0	0	1
AT2G33880	0	0	0	-1	0	0	1
AT2G34210	0	0	0	0	0	1	1
AT2G34555	0	0	0	0	1	0	1
AT2G34730	0	0	0	0	0	-1	1
AT2G34850	0	0	0	0	-1	0	1
AT2G34920	0	0	1	0	0	0	1
AT2G35080	0	0	1	0	0	0	1
AT2G35155	0	1	0	0	0	0	1
AT2G35510	0	0	-1	0	0	0	1
AT2G35635	0	0	-1	0	0	0	1
AT2G35700	0	0	0	-1	0	0	1
AT2G35790	0	1	0	0	0	0	1
AT2G35860	1	0	0	0	0	0	1
AT2G35920	1	0	0	0	0	0	1
AT2G35980	0	0	-1	0	0	0	1
AT2G36390	0	0	-1	0	0	0	1
AT2G36540	0	0	-1	0	0	0	1
AT2G36740	0	1	0	0	0	0	1
AT2G36780	0	0	-1	0	0	0	1
AT2G36815	0	0	0	0	0	1	1
AT2G36990	0	-1	0	0	0	0	1
AT2G37030	0	0	0	0	0	1	1
AT2G37200	0	-1	0	0	0	0	1
AT2G37440	0	0	0	0	1	0	1
AT2G37530	0	0	0	0	0	1	1
AT2G37700	0	0	-1	0	0	0	1
AT2G37740	0	0	1	0	0	0	1
AT2G37830	0	-1	0	0	0	0	1
AT2G37870	0	0	-1	0	0	0	1
AT2G38025	0	-1	0	0	0	0	1
AT2G38100	0	0	0	0	1	0	1
AT2G38120	0	0	0	0	0	-1	1
AT2G38300	0	0	-1	0	0	0	1
AT2G38330	0	-1	0	0	0	0	1
AT2G38540	0	0	1	0	0	0	1
AT2G38580	0	1	0	0	0	0	1
AT2G38590	0	0	1	0	0	0	1
AT2G38905	0	0	1	0	0	0	1
AT2G39140	0	0	0	0	0	1	1
AT2G39270	-1	0	0	0	0	0	1
AT2G39320	0	0	1	0	0	0	1
AT2G39851	0	0	1	0	0	0	1
AT2G40110	-1	0	0	0	0	0	1
AT2G40113	0	0	-1	0	0	0	1
AT2G40116	0	0	1	0	0	0	1
AT2G40170	-1	0	0	0	0	0	1
AT2G40350	0	1	0	0	0	0	1
AT2G40480	0	0	1	0	0	0	1
AT2G40690	0	0	1	0	0	0	1
AT2G40840	-1	0	0	0	0	0	1
AT2G40910	0	0	0	0	1	0	1
AT2G40930	1	0	0	0	0	0	1
AT2G41200	-1	0	0	0	0	0	1
AT2G41225	0	0	1	0	0	0	1
AT2G41280	0	-1	0	0	0	0	1
AT2G41310	0	0	-1	0	0	0	1
AT2G41330	-1	0	0	0	0	0	1
AT2G41342	0	0	-1	0	0	0	1
AT2G41415	0	0	0	0	0	1	1
AT2G42180	0	0	1	0	0	0	1
AT2G42300	0	1	0	0	0	0	1
AT2G42390	0	0	-1	0	0	0	1
AT2G42410	0	0	0	0	1	0	1
AT2G42470	0	0	0	0	1	0	1
AT2G42480	0	0	1	0	0	0	1
AT2G42560	0	0	-1	0	0	0	1
AT2G42870	0	0	0	0	0	1	1
AT2G43000	0	0	-1	0	0	0	1
AT2G43200	0	0	-1	0	0	0	1
AT2G43220	0	0	0	0	0	1	1
AT2G43320	0	0	-1	0	0	0	1
AT2G43330	0	-1	0	0	0	0	1
AT2G43450	0	0	1	0	0	0	1
AT2G43500	0	0	-1	0	0	0	1
AT2G43660	0	0	1	0	0	0	1
AT2G43700	-1	0	0	0	0	0	1
AT2G43870	0	0	1	0	0	0	1
AT2G43900	0	0	0	0	0	1	1
AT2G44040	0	0	1	0	0	0	1
AT2G44250	0	0	0	0	1	0	1
AT2G44300	0	0	0	0	1	0	1
AT2G44340	0	0	1	0	0	0	1
AT2G44383	0	0	-1	0	0	0	1
AT2G44480	0	0	-1	0	0	0	1
AT2G44578	-1	0	0	0	0	0	1
AT2G44840	0	0	0	0	-1	0	1
AT2G45140	0	0	-1	0	0	0	1
AT2G45160	0	0	0	0	-1	0	1
AT2G45300	0	1	0	0	0	0	1
AT2G45315	0	0	1	0	0	0	1
AT2G45350	0	-1	0	0	0	0	1
AT2G45380	0	0	-1	0	0	0	1
AT2G45685	0	0	-1	0	0	0	1
AT2G45770	0	-1	0	0	0	0	1
AT2G45960	-1	0	0	0	0	0	1
AT2G46130	0	0	0	0	1	0	1
AT2G46420	0	0	0	0	0	-1	1
AT2G46480	0	0	1	0	0	0	1
AT2G46860	0	0	1	0	0	0	1
AT2G46880	0	0	0	0	0	1	1
AT2G47120	0	0	0	0	0	1	1
AT2G47340	0	0	0	0	1	0	1
AT2G47520	0	0	0	0	-1	0	1
AT2G47940	0	0	0	0	0	1	1
AT2G48120	0	0	1	0	0	0	1
AT2G48130	0	0	0	0	0	1	1
AT2G48140	0	0	0	0	1	0	1
AT3G01030	0	0	1	0	0	0	1
AT3G01140	0	0	0	0	1	0	1
AT3G01420	-1	0	0	0	0	0	1
AT3G01680	0	0	0	0	0	1	1
AT3G01760	0	0	-1	0	0	0	1
AT3G01960	0	0	-1	0	0	0	1
AT3G02125	0	0	0	0	-1	0	1
AT3G02140	0	0	0	0	0	-1	1
AT3G02190	0	1	0	0	0	0	1
AT3G02200	1	0	0	0	0	0	1
AT3G02450	0	-1	0	0	0	0	1
AT3G02620	0	0	0	0	0	1	1
AT3G02740	0	0	-1	0	0	0	1
AT3G02810	0	0	1	0	0	0	1
AT3G02870	0	1	0	0	0	0	1
AT3G02885	0	0	-1	0	0	0	1
AT3G02990	0	0	-1	0	0	0	1
AT3G03010	1	0	0	0	0	0	1
AT3G03020	0	0	-1	0	0	0	1
AT3G03080	0	0	1	0	0	0	1
AT3G03380	0	-1	0	0	0	0	1
AT3G03430	0	0	1	0	0	0	1
AT3G03760	0	0	0	0	1	0	1
AT3G03800	0	0	1	0	0	0	1
AT3G03900	0	0	1	0	0	0	1
AT3G04040	0	0	-1	0	0	0	1
AT3G04160	0	1	0	0	0	0	1
AT3G04220	-1	0	0	0	0	0	1
AT3G04480	0	0	-1	0	0	0	1
AT3G04520	0	0	0	0	-1	0	1
AT3G04580	0	0	-1	0	0	0	1
AT3G04630	0	0	0	0	0	-1	1
AT3G04680	0	1	0	0	0	0	1
AT3G04700	0	0	1	0	0	0	1
AT3G04780	0	1	0	0	0	0	1
AT3G04860	0	0	0	0	0	-1	1
AT3G04990	0	1	0	0	0	0	1
AT3G05150	0	0	0	0	1	0	1
AT3G05230	0	1	0	0	0	0	1
AT3G05327	0	-1	0	0	0	0	1
AT3G05410	0	-1	0	0	0	0	1
AT3G05780	0	0	0	0	0	1	1
AT3G05800	0	0	0	0	0	-1	1
AT3G06020	0	0	1	0	0	0	1
AT3G06160	0	0	0	0	0	1	1
AT3G06170	0	0	-1	0	0	0	1
AT3G06220	0	0	0	0	0	-1	1
AT3G06540	0	0	-1	0	0	0	1
AT3G06545	0	0	1	0	0	0	1
AT3G06620	0	0	-1	0	0	0	1
AT3G06650	0	0	1	0	0	0	1
AT3G06730	0	0	1	0	0	0	1
AT3G06810	0	-1	0	0	0	0	1
AT3G06820	1	0	0	0	0	0	1
AT3G07120	0	0	0	0	0	1	1
AT3G07390	0	0	0	0	0	1	1
AT3G07580	0	0	0	0	0	-1	1
AT3G07620	0	0	0	0	1	0	1
AT3G07630	-1	0	0	0	0	0	1
AT3G07830	0	0	0	0	0	1	1
AT3G08590	-1	0	0	0	0	0	1
AT3G08630	0	0	1	0	0	0	1
AT3G08750	0	0	0	0	1	0	1
AT3G08885	0	0	0	-1	0	0	1
AT3G09020	0	0	-1	0	0	0	1
AT3G09060	1	0	0	0	0	0	1
AT3G09210	0	-1	0	0	0	0	1
AT3G09240	0	0	0	0	0	1	1
AT3G09350	0	0	-1	0	0	0	1
AT3G09375	0	0	1	0	0	0	1
AT3G09400	0	-1	0	0	0	0	1
AT3G09930	0	0	0	0	0	1	1
AT3G10010	0	0	0	0	0	1	1
AT3G10116	0	0	1	0	0	0	1
AT3G10120	0	0	-1	0	0	0	1
AT3G10185	1	0	0	0	0	0	1
AT3G10300	0	0	-1	0	0	0	1
AT3G10350	0	-1	0	0	0	0	1
AT3G10370	-1	0	0	0	0	0	1
AT3G10380	0	0	-1	0	0	0	1
AT3G10480	0	0	0	0	0	-1	1
AT3G10575	0	0	0	0	1	0	1
AT3G10815	-1	0	0	0	0	0	1
AT3G11010	0	0	-1	0	0	0	1
AT3G11150	0	0	0	0	-1	0	1
AT3G11160	0	0	1	0	0	0	1
AT3G11165	0	0	1	0	0	0	1
AT3G11180	0	0	0	0	1	0	1
AT3G11230	0	0	-1	0	0	0	1
AT3G11270	0	1	0	0	0	0	1
AT3G11415	0	0	0	0	1	0	1
AT3G11540	1	0	0	0	0	0	1
AT3G11560	0	-1	0	0	0	0	1
AT3G11740	0	0	0	0	0	1	1
AT3G12000	0	0	0	0	0	1	1
AT3G12030	-1	0	0	0	0	0	1
AT3G12050	0	1	0	0	0	0	1
AT3G12130	0	1	0	0	0	0	1
AT3G12160	0	0	0	0	1	0	1
AT3G12500	0	0	0	0	-1	0	1
AT3G12540	0	0	1	0	0	0	1
AT3G13040	0	0	-1	0	0	0	1
AT3G13120	0	0	0	0	0	1	1
AT3G13277	-1	0	0	0	0	0	1
AT3G13280	0	0	0	0	1	0	1
AT3G13320	0	0	-1	0	0	0	1
AT3G13404	0	0	0	-1	0	0	1
AT3G13433	-1	0	0	0	0	0	1
AT3G13680	0	0	0	0	1	0	1
AT3G13800	0	-1	0	0	0	0	1
AT3G13820	0	0	1	0	0	0	1
AT3G13840	0	-1	0	0	0	0	1
AT3G13940	0	1	0	0	0	0	1
AT3G14172	0	1	0	0	0	0	1
AT3G14205	0	-1	0	0	0	0	1
AT3G14740	0	0	0	0	0	-1	1
AT3G14780	0	0	1	0	0	0	1
AT3G14840	0	0	0	-1	0	0	1
AT3G14970	0	0	1	0	0	0	1
AT3G15354	0	-1	0	0	0	0	1
AT3G15440	0	0	0	0	1	0	1
AT3G15490	0	0	1	0	0	0	1
AT3G15520	0	0	0	0	0	1	1
AT3G15536	-1	0	0	0	0	0	1
AT3G15700	0	0	1	0	0	0	1
AT3G15740	0	0	0	0	0	1	1
AT3G16170	0	0	1	0	0	0	1
AT3G16200	0	1	0	0	0	0	1
AT3G16240	0	0	0	0	0	1	1
AT3G16300	0	0	0	0	0	1	1
AT3G16330	1	0	0	0	0	0	1
AT3G16500	1	0	0	0	0	0	1
AT3G16580	0	0	0	0	1	0	1
AT3G16690	-1	0	0	0	0	0	1
AT3G16840	1	0	0	0	0	0	1
AT3G17170	0	0	1	0	0	0	1
AT3G17200	1	0	0	0	0	0	1
AT3G17300	0	1	0	0	0	0	1
AT3G17310	0	1	0	0	0	0	1
AT3G17660	0	0	1	0	0	0	1
AT3G17670	0	-1	0	0	0	0	1
AT3G17690	0	0	0	0	0	-1	1
AT3G17790	0	0	0	0	0	-1	1
AT3G17910	1	0	0	0	0	0	1
AT3G18040	0	0	1	0	0	0	1
AT3G18362	0	0	0	0	1	0	1
AT3G18380	0	1	0	0	0	0	1
AT3G18390	0	0	0	0	0	1	1
AT3G18715	0	0	0	0	-1	0	1
AT3G18773	0	-1	0	0	0	0	1
AT3G18777	0	0	-1	0	0	0	1
AT3G18840	1	0	0	0	0	0	1
AT3G18930	0	-1	0	0	0	0	1
AT3G19045	0	0	-1	0	0	0	1
AT3G19090	0	0	1	0	0	0	1
AT3G19130	0	0	0	0	-1	0	1
AT3G19150	-1	0	0	0	0	0	1
AT3G19200	1	0	0	0	0	0	1
AT3G19290	0	0	-1	0	0	0	1
AT3G19360	0	0	1	0	0	0	1
AT3G19760	0	1	0	0	0	0	1
AT3G19950	-1	0	0	0	0	0	1
AT3G20060	0	0	-1	0	0	0	1
AT3G20085	-1	0	0	0	0	0	1
AT3G20120	0	1	0	0	0	0	1
AT3G20190	0	0	1	0	0	0	1
AT3G20230	0	0	0	0	0	1	1
AT3G20370	0	0	0	-1	0	0	1
AT3G20500	0	0	-1	0	0	0	1
AT3G20580	0	0	1	0	0	0	1
AT3G20640	0	0	0	0	1	0	1
AT3G20710	0	0	0	0	1	0	1
AT3G20780	1	0	0	0	0	0	1
AT3G20820	0	0	1	0	0	0	1
AT3G20990	0	0	1	0	0	0	1
AT3G21180	0	0	1	0	0	0	1
AT3G21310	0	0	1	0	0	0	1
AT3G21320	0	0	1	0	0	0	1
AT3G21460	0	0	-1	0	0	0	1
AT3G21710	0	0	-1	0	0	0	1
AT3G21781	0	0	-1	0	0	0	1
AT3G21890	0	0	0	1	0	0	1
AT3G21937	0	0	0	0	0	1	1
AT3G21945	0	0	0	0	0	1	1
AT3G21970	0	0	0	0	0	1	1
AT3G22104	0	0	0	0	0	1	1
AT3G22120	0	0	0	-1	0	0	1
AT3G22200	0	-1	0	0	0	0	1
AT3G22235	0	0	-1	0	0	0	1
AT3G22415	-1	0	0	0	0	0	1
AT3G22420	0	0	0	0	1	0	1
AT3G22430	0	0	-1	0	0	0	1
AT3G22510	0	0	0	0	0	1	1
AT3G22640	0	0	0	0	1	0	1
AT3G22650	0	0	0	0	1	0	1
AT3G22800	0	0	1	0	0	0	1
AT3G22820	-1	0	0	0	0	0	1
AT3G22961	-1	0	0	0	0	0	1
AT3G23060	0	0	0	0	0	1	1
AT3G23130	0	0	0	0	0	1	1
AT3G23300	0	-1	0	0	0	0	1
AT3G23310	0	0	0	0	-1	0	1
AT3G23325	0	0	0	0	0	-1	1
AT3G23580	1	0	0	0	0	0	1
AT3G24000	1	0	0	0	0	0	1
AT3G24220	0	0	1	0	0	0	1
AT3G24280	0	0	0	0	1	0	1
AT3G24360	0	0	1	0	0	0	1
AT3G24770	1	0	0	0	0	0	1
AT3G25030	0	1	0	0	0	0	1
AT3G25060	0	0	1	0	0	0	1
AT3G25510	0	0	-1	0	0	0	1
AT3G25530	-1	0	0	0	0	0	1
AT3G25573	0	-1	0	0	0	0	1
AT3G25620	0	0	0	0	-1	0	1
AT3G25810	0	0	0	0	0	1	1
AT3G25815	0	-1	0	0	0	0	1
AT3G25980	0	0	0	0	0	-1	1
AT3G26010	0	0	1	0	0	0	1
AT3G26090	0	0	-1	0	0	0	1
AT3G26140	0	0	1	0	0	0	1
AT3G26320	0	0	-1	0	0	0	1
AT3G26390	0	0	0	0	1	0	1
AT3G26445	0	0	0	0	1	0	1
AT3G26520	0	-1	0	0	0	0	1
AT3G26550	1	0	0	0	0	0	1
AT3G26900	0	-1	0	0	0	0	1
AT3G27010	0	0	-1	0	0	0	1
AT3G27260	0	0	-1	0	0	0	1
AT3G27350	0	0	1	0	0	0	1
AT3G27360	0	0	0	0	0	-1	1
AT3G27400	0	0	-1	0	0	0	1
AT3G27540	0	-1	0	0	0	0	1
AT3G27580	0	1	0	0	0	0	1
AT3G27620	0	0	0	0	0	1	1
AT3G27720	0	1	0	0	0	0	1
AT3G27810	0	0	1	0	0	0	1
AT3G27880	0	0	1	0	0	0	1
AT3G27906	0	0	1	0	0	0	1
AT3G27970	-1	0	0	0	0	0	1
AT3G28153	0	0	1	0	0	0	1
AT3G28223	0	0	0	0	1	0	1
AT3G28350	0	0	1	0	0	0	1
AT3G28390	0	0	0	0	1	0	1
AT3G28490	0	0	0	0	1	0	1
AT3G28560	1	0	0	0	0	0	1
AT3G28600	0	0	0	0	0	1	1
AT3G28715	-1	0	0	0	0	0	1
AT3G28820	0	0	0	0	0	1	1
AT3G28840	0	0	1	0	0	0	1
AT3G28920	-1	0	0	0	0	0	1
AT3G28925	1	0	0	0	0	0	1
AT3G28990	1	0	0	0	0	0	1
AT3G29034	0	0	-1	0	0	0	1
AT3G30180	0	0	0	1	0	0	1
AT3G30340	0	0	1	0	0	0	1
AT3G30803	0	0	0	0	0	1	1
AT3G36659	0	0	1	0	0	0	1
AT3G42050	0	-1	0	0	0	0	1
AT3G43240	0	1	0	0	0	0	1
AT3G43400	0	1	0	0	0	0	1
AT3G43828	0	0	-1	0	0	0	1
AT3G43970	0	1	0	0	0	0	1
AT3G44190	0	0	-1	0	0	0	1
AT3G44200	-1	0	0	0	0	0	1
AT3G44220	0	0	1	0	0	0	1
AT3G44230	0	0	1	0	0	0	1
AT3G44560	0	0	-1	0	0	0	1
AT3G44680	1	0	0	0	0	0	1
AT3G44890	0	0	0	0	0	1	1
AT3G45080	0	0	0	0	1	0	1
AT3G45400	0	0	1	0	0	0	1
AT3G45480	0	0	0	0	1	0	1
AT3G45540	0	0	0	0	1	0	1
AT3G45570	0	0	1	0	0	0	1
AT3G45660	1	0	0	0	0	0	1
AT3G45860	0	-1	0	0	0	0	1
AT3G45940	0	0	1	0	0	0	1
AT3G46070	0	0	0	0	0	1	1
AT3G46280	-1	0	0	0	0	0	1
AT3G46460	-1	0	0	0	0	0	1
AT3G46580	0	1	0	0	0	0	1
AT3G46640	0	-1	0	0	0	0	1
AT3G46650	0	0	-1	0	0	0	1
AT3G46690	0	0	-1	0	0	0	1
AT3G46700	-1	0	0	0	0	0	1
AT3G46730	0	-1	0	0	0	0	1
AT3G46970	0	-1	0	0	0	0	1
AT3G47010	0	0	-1	0	0	0	1
AT3G47050	0	0	-1	0	0	0	1
AT3G47130	0	0	0	0	0	1	1
AT3G47550	0	0	-1	0	0	0	1
AT3G47560	0	-1	0	0	0	0	1
AT3G47730	0	0	-1	0	0	0	1
AT3G48010	0	0	1	0	0	0	1
AT3G48020	0	0	-1	0	0	0	1
AT3G48140	0	0	-1	0	0	0	1
AT3G48180	0	0	0	0	1	0	1
AT3G48240	0	0	1	0	0	0	1
AT3G48470	1	0	0	0	0	0	1
AT3G48550	0	0	1	0	0	0	1
AT3G48810	0	1	0	0	0	0	1
AT3G48860	0	0	-1	0	0	0	1
AT3G49300	0	0	0	0	1	0	1
AT3G49340	0	-1	0	0	0	0	1
AT3G49620	0	0	-1	0	0	0	1
AT3G49725	1	0	0	0	0	0	1
AT3G49730	0	1	0	0	0	0	1
AT3G49760	0	0	0	0	0	-1	1
AT3G49820	0	0	0	0	0	-1	1
AT3G49930	-1	0	0	0	0	0	1
AT3G49970	0	0	0	0	-1	0	1
AT3G50040	0	0	1	0	0	0	1
AT3G50110	0	0	1	0	0	0	1
AT3G50120	0	0	1	0	0	0	1
AT3G50140	0	-1	0	0	0	0	1
AT3G50210	-1	0	0	0	0	0	1
AT3G50420	1	0	0	0	0	0	1
AT3G50460	0	-1	0	0	0	0	1
AT3G51075	0	0	0	0	0	1	1
AT3G51140	0	-1	0	0	0	0	1
AT3G51160	-1	0	0	0	0	0	1
AT3G51190	0	0	1	0	0	0	1
AT3G51270	1	0	0	0	0	0	1
AT3G51300	0	0	1	0	0	0	1
AT3G51470	0	0	1	0	0	0	1
AT3G51550	0	-1	0	0	0	0	1
AT3G51690	0	0	1	0	0	0	1
AT3G51710	0	-1	0	0	0	0	1
AT3G51830	0	0	-1	0	0	0	1
AT3G52010	0	0	1	0	0	0	1
AT3G52040	0	1	0	0	0	0	1
AT3G52120	0	-1	0	0	0	0	1
AT3G52420	0	1	0	0	0	0	1
AT3G52440	0	0	0	0	0	1	1
AT3G52480	0	-1	0	0	0	0	1
AT3G52490	0	0	0	0	0	1	1
AT3G52620	0	0	0	0	0	1	1
AT3G52748	0	-1	0	0	0	0	1
AT3G52750	0	-1	0	0	0	0	1
AT3G53010	0	0	0	0	1	0	1
AT3G53030	0	0	-1	0	0	0	1
AT3G53100	0	0	0	0	1	0	1
AT3G53150	0	0	-1	0	0	0	1
AT3G53220	1	0	0	0	0	0	1
AT3G53232	0	0	0	0	1	0	1
AT3G53270	0	0	-1	0	0	0	1
AT3G53360	1	0	0	0	0	0	1
AT3G53460	0	0	0	0	0	1	1
AT3G53510	0	0	0	0	0	1	1
AT3G53710	-1	0	0	0	0	0	1
AT3G54020	1	0	0	0	0	0	1
AT3G54350	1	0	0	0	0	0	1
AT3G54620	0	0	-1	0	0	0	1
AT3G54650	1	0	0	0	0	0	1
AT3G54700	0	0	1	0	0	0	1
AT3G54730	0	0	0	0	1	0	1
AT3G54826	0	0	0	0	0	-1	1
AT3G54910	0	0	1	0	0	0	1
AT3G54920	1	0	0	0	0	0	1
AT3G54960	-1	0	0	0	0	0	1
AT3G54990	0	0	1	0	0	0	1
AT3G55180	0	0	0	0	0	1	1
AT3G55200	0	1	0	0	0	0	1
AT3G55300	1	0	0	0	0	0	1
AT3G55410	0	0	-1	0	0	0	1
AT3G55440	-1	0	0	0	0	0	1
AT3G55450	0	0	-1	0	0	0	1
AT3G55590	0	0	1	0	0	0	1
AT3G55646	0	0	-1	0	0	0	1
AT3G55870	0	0	0	0	1	0	1
AT3G55900	-1	0	0	0	0	0	1
AT3G56000	0	0	-1	0	0	0	1
AT3G56090	1	0	0	0	0	0	1
AT3G56420	0	0	0	0	0	1	1
AT3G56580	0	1	0	0	0	0	1
AT3G57040	0	-1	0	0	0	0	1
AT3G57120	0	0	0	0	-1	0	1
AT3G57157	0	0	1	0	0	0	1
AT3G57430	0	-1	0	0	0	0	1
AT3G57580	0	1	0	0	0	0	1
AT3G57600	0	0	1	0	0	0	1
AT3G57630	0	0	-1	0	0	0	1
AT3G57690	0	0	1	0	0	0	1
AT3G57730	0	0	-1	0	0	0	1
AT3G57770	0	0	-1	0	0	0	1
AT3G57800	0	0	0	0	1	0	1
AT3G57950	0	0	1	0	0	0	1
AT3G57960	0	0	1	0	0	0	1
AT3G58050	0	-1	0	0	0	0	1
AT3G58060	0	0	0	0	1	0	1
AT3G58210	0	0	1	0	0	0	1
AT3G58240	0	0	0	0	0	1	1
AT3G58250	0	0	0	0	1	0	1
AT3G58260	0	0	0	0	1	0	1
AT3G58280	0	0	1	0	0	0	1
AT3G58360	0	0	1	0	0	0	1
AT3G58780	0	0	0	0	0	1	1
AT3G58790	0	-1	0	0	0	0	1
AT3G58830	0	-1	0	0	0	0	1
AT3G58860	0	0	0	0	1	0	1
AT3G58950	0	0	1	0	0	0	1
AT3G59090	0	0	-1	0	0	0	1
AT3G59100	1	0	0	0	0	0	1
AT3G59370	0	-1	0	0	0	0	1
AT3G59400	0	-1	0	0	0	0	1
AT3G59480	0	0	0	0	0	1	1
AT3G59680	1	0	0	0	0	0	1
AT3G59710	0	-1	0	0	0	0	1
AT3G59750	0	0	0	0	0	-1	1
AT3G59960	0	0	0	0	0	1	1
AT3G60070	0	0	1	0	0	0	1
AT3G60164	-1	0	0	0	0	0	1
AT3G60280	0	0	1	0	0	0	1
AT3G60300	0	-1	0	0	0	0	1
AT3G60530	0	1	0	0	0	0	1
AT3G60957	0	0	0	0	-1	0	1
AT3G61010	0	0	0	0	0	1	1
AT3G61120	0	0	0	0	1	0	1
AT3G61390	0	0	-1	0	0	0	1
AT3G61520	0	1	0	0	0	0	1
AT3G61730	0	0	1	0	0	0	1
AT3G61790	0	0	-1	0	0	0	1
AT3G61880	0	0	-1	0	0	0	1
AT3G61920	0	0	1	0	0	0	1
AT3G62070	0	0	0	0	0	-1	1
AT3G62690	0	-1	0	0	0	0	1
AT3G62760	0	0	0	0	0	1	1
AT3G62840	0	1	0	0	0	0	1
AT3G62880	-1	0	0	0	0	0	1
AT3G63020	0	0	0	0	0	1	1
AT3G63170	0	0	0	0	1	0	1
AT4G00120	0	0	0	0	0	1	1
AT4G00180	0	0	1	0	0	0	1
AT4G00250	0	0	0	0	0	1	1
AT4G00270	0	1	0	0	0	0	1
AT4G00350	0	0	1	0	0	0	1
AT4G00390	0	0	0	0	1	0	1
AT4G00400	0	0	0	0	1	0	1
AT4G00525	0	1	0	0	0	0	1
AT4G00695	0	0	1	0	0	0	1
AT4G00755	0	0	1	0	0	0	1
AT4G00920	0	0	0	0	1	0	1
AT4G00930	1	0	0	0	0	0	1
AT4G00950	0	-1	0	0	0	0	1
AT4G01020	0	0	0	0	0	-1	1
AT4G01120	0	0	0	0	-1	0	1
AT4G01130	0	-1	0	0	0	0	1
AT4G01170	0	1	0	0	0	0	1
AT4G01190	0	0	0	0	1	0	1
AT4G01335	0	-1	0	0	0	0	1
AT4G01440	0	0	0	0	1	0	1
AT4G01910	-1	0	0	0	0	0	1
AT4G01960	0	0	0	0	0	-1	1
AT4G02060	0	0	0	0	0	-1	1
AT4G02250	0	0	1	0	0	0	1
AT4G02330	0	0	0	-1	0	0	1
AT4G02405	0	0	-1	0	0	0	1
AT4G02510	0	-1	0	0	0	0	1
AT4G02660	0	0	1	0	0	0	1
AT4G02733	0	0	0	0	0	1	1
AT4G02950	0	0	0	0	0	1	1
AT4G03290	0	0	1	0	0	0	1
AT4G03450	0	0	-1	0	0	0	1
AT4G03460	0	-1	0	0	0	0	1
AT4G03935	1	0	0	0	0	0	1
AT4G03960	0	1	0	0	0	0	1
AT4G04105	-1	0	0	0	0	0	1
AT4G04293	-1	0	0	0	0	0	1
AT4G04340	0	-1	0	0	0	0	1
AT4G04350	0	-1	0	0	0	0	1
AT4G04490	0	0	-1	0	0	0	1
AT4G04540	0	0	-1	0	0	0	1
AT4G04745	0	0	-1	0	0	0	1
AT4G04780	1	0	0	0	0	0	1
AT4G04840	0	0	-1	0	0	0	1
AT4G04980	0	0	0	0	0	1	1
AT4G05130	0	0	-1	0	0	0	1
AT4G05310	0	0	1	0	0	0	1
AT4G06746	0	0	-1	0	0	0	1
AT4G08520	0	1	0	0	0	0	1
AT4G08540	0	0	-1	0	0	0	1
AT4G08790	0	1	0	0	0	0	1
AT4G08840	0	0	1	0	0	0	1
AT4G08980	1	0	0	0	0	0	1
AT4G09040	0	0	0	0	0	1	1
AT4G09570	0	-1	0	0	0	0	1
AT4G09640	1	0	0	0	0	0	1
AT4G09770	-1	0	0	0	0	0	1
AT4G09965	0	0	0	0	0	1	1
AT4G10170	0	0	-1	0	0	0	1
AT4G10440	0	0	1	0	0	0	1
AT4G10500	0	0	-1	0	0	0	1
AT4G10507	0	0	0	0	1	0	1
AT4G10730	0	0	-1	0	0	0	1
AT4G10740	0	0	1	0	0	0	1
AT4G10890	0	0	1	0	0	0	1
AT4G10970	0	0	-1	0	0	0	1
AT4G10990	0	0	-1	0	0	0	1
AT4G11030	0	0	0	0	0	1	1
AT4G11040	1	0	0	0	0	0	1
AT4G11220	-1	0	0	0	0	0	1
AT4G11810	0	0	1	0	0	0	1
AT4G11920	0	1	0	0	0	0	1
AT4G12382	0	0	0	0	1	0	1
AT4G12440	0	0	0	0	-1	0	1
AT4G12545	-1	0	0	0	0	0	1
AT4G12920	0	0	1	0	0	0	1
AT4G12940	0	0	1	0	0	0	1
AT4G13050	0	1	0	0	0	0	1
AT4G13100	0	0	1	0	0	0	1
AT4G13410	0	-1	0	0	0	0	1
AT4G13560	0	0	1	0	0	0	1
AT4G13564	-1	0	0	0	0	0	1
AT4G13615	0	0	-1	0	0	0	1
AT4G13790	0	0	0	0	0	1	1
AT4G13890	0	0	-1	0	0	0	1
AT4G13930	0	0	1	0	0	0	1
AT4G14250	0	0	1	0	0	0	1
AT4G14301	0	0	0	0	0	1	1
AT4G14368	0	0	0	0	0	1	1
AT4G14390	0	-1	0	0	0	0	1
AT4G14530	0	0	1	0	0	0	1
AT4G14548	0	-1	0	0	0	0	1
AT4G14580	0	0	-1	0	0	0	1
AT4G14605	0	0	-1	0	0	0	1
AT4G14620	0	0	0	0	0	1	1
AT4G14630	-1	0	0	0	0	0	1
AT4G14760	-1	0	0	0	0	0	1
AT4G14840	1	0	0	0	0	0	1
AT4G14850	0	1	0	0	0	0	1
AT4G15090	0	1	0	0	0	0	1
AT4G15100	0	0	0	0	1	0	1
AT4G15130	0	0	-1	0	0	0	1
AT4G15215	1	0	0	0	0	0	1
AT4G15230	0	0	0	0	0	1	1
AT4G15260	0	0	-1	0	0	0	1
AT4G15330	0	0	-1	0	0	0	1
AT4G15350	1	0	0	0	0	0	1
AT4G15390	0	0	0	0	1	0	1
AT4G15650	0	0	0	0	1	0	1
AT4G15802	0	1	0	0	0	0	1
AT4G15980	0	0	0	0	1	0	1
AT4G16030	0	0	1	0	0	0	1
AT4G16060	-1	0	0	0	0	0	1
AT4G16144	0	-1	0	0	0	0	1
AT4G16155	0	0	0	0	1	0	1
AT4G16540	0	0	1	0	0	0	1
AT4G16770	0	0	-1	0	0	0	1
AT4G16830	0	0	-1	0	0	0	1
AT4G17200	0	0	1	0	0	0	1
AT4G17210	0	0	0	0	0	1	1
AT4G17430	0	1	0	0	0	0	1
AT4G17660	0	0	-1	0	0	0	1
AT4G17690	0	0	0	0	1	0	1
AT4G17920	0	0	1	0	0	0	1
AT4G18040	0	1	0	0	0	0	1
AT4G18070	0	0	0	0	-1	0	1
AT4G18080	0	0	0	0	0	1	1
AT4G18180	0	0	0	0	0	1	1
AT4G18190	0	0	1	0	0	0	1
AT4G18375	1	0	0	0	0	0	1
AT4G18680	0	0	1	0	0	0	1
AT4G18840	0	1	0	0	0	0	1
AT4G18920	0	0	0	0	0	1	1
AT4G19220	1	0	0	0	0	0	1
AT4G19240	1	0	0	0	0	0	1
AT4G19350	0	1	0	0	0	0	1
AT4G19645	0	0	1	0	0	0	1
AT4G19700	0	0	-1	0	0	0	1
AT4G20000	0	0	-1	0	0	0	1
AT4G20080	0	0	0	0	1	0	1
AT4G20100	0	0	1	0	0	0	1
AT4G20160	0	0	0	0	1	0	1
AT4G20320	0	1	0	0	0	0	1
AT4G20450	0	0	0	0	1	0	1
AT4G20980	0	1	0	0	0	0	1
AT4G21130	0	0	0	0	1	0	1
AT4G21200	0	0	0	0	0	1	1
AT4G21330	0	0	1	0	0	0	1
AT4G21440	0	0	-1	0	0	0	1
AT4G21450	0	0	-1	0	0	0	1
AT4G21640	0	0	0	0	0	1	1
AT4G21770	0	0	1	0	0	0	1
AT4G21920	0	-1	0	0	0	0	1
AT4G21930	0	0	-1	0	0	0	1
AT4G22030	0	0	0	0	0	1	1
AT4G22070	0	0	1	0	0	0	1
AT4G22214	0	0	0	0	1	0	1
AT4G22470	0	0	-1	0	0	0	1
AT4G22758	-1	0	0	0	0	0	1
AT4G22780	0	0	-1	0	0	0	1
AT4G23140	0	0	-1	0	0	0	1
AT4G23230	0	0	-1	0	0	0	1
AT4G23310	0	0	-1	0	0	0	1
AT4G23320	0	0	-1	0	0	0	1
AT4G23340	0	0	0	-1	0	0	1
AT4G23440	0	0	0	0	0	-1	1
AT4G23450	0	0	-1	0	0	0	1
AT4G23560	0	0	0	0	0	1	1
AT4G23610	0	0	-1	0	0	0	1
AT4G23790	0	0	0	0	-1	0	1
AT4G23800	0	0	0	0	0	-1	1
AT4G23810	0	0	-1	0	0	0	1
AT4G23940	0	0	1	0	0	0	1
AT4G24100	0	0	-1	0	0	0	1
AT4G24175	1	0	0	0	0	0	1
AT4G24240	0	0	0	0	-1	0	1
AT4G24265	0	1	0	0	0	0	1
AT4G24290	0	0	-1	0	0	0	1
AT4G24590	0	0	-1	0	0	0	1
AT4G24740	0	0	-1	0	0	0	1
AT4G24750	0	0	0	0	0	1	1
AT4G24890	0	0	0	0	1	0	1
AT4G25040	0	0	0	0	0	1	1
AT4G25260	0	-1	0	0	0	0	1
AT4G25580	0	0	-1	0	0	0	1
AT4G25770	0	0	-1	0	0	0	1
AT4G25835	0	0	0	0	0	1	1
AT4G26050	0	0	-1	0	0	0	1
AT4G26160	0	0	-1	0	0	0	1
AT4G26200	0	0	-1	0	0	0	1
AT4G26400	0	-1	0	0	0	0	1
AT4G26555	0	-1	0	0	0	0	1
AT4G26690	0	-1	0	0	0	0	1
AT4G26820	0	0	0	0	0	1	1
AT4G27020	0	0	-1	0	0	0	1
AT4G27070	0	0	0	0	0	-1	1
AT4G27080	1	0	0	0	0	0	1
AT4G27250	0	0	0	0	0	1	1
AT4G27330	0	0	1	0	0	0	1
AT4G27420	0	0	0	0	1	0	1
AT4G27440	0	0	0	0	0	1	1
AT4G27650	0	0	-1	0	0	0	1
AT4G27745	0	0	-1	0	0	0	1
AT4G27810	1	0	0	0	0	0	1
AT4G27840	0	0	0	1	0	0	1
AT4G27900	0	1	0	0	0	0	1
AT4G27910	0	0	1	0	0	0	1
AT4G28085	0	0	-1	0	0	0	1
AT4G28090	0	0	1	0	0	0	1
AT4G28162	0	0	0	0	1	0	1
AT4G28340	0	0	-1	0	0	0	1
AT4G28580	0	0	0	0	1	0	1
AT4G28703	1	0	0	0	0	0	1
AT4G28710	0	0	-1	0	0	0	1
AT4G28790	0	0	0	0	0	1	1
AT4G29380	0	-1	0	0	0	0	1
AT4G29560	1	0	0	0	0	0	1
AT4G29658	0	0	1	0	0	0	1
AT4G29780	0	-1	0	0	0	0	1
AT4G30100	0	-1	0	0	0	0	1
AT4G30170	0	0	1	0	0	0	1
AT4G30300	0	-1	0	0	0	0	1
AT4G30630	0	0	0	0	0	-1	1
AT4G30640	0	-1	0	0	0	0	1
AT4G30730	0	0	1	0	0	0	1
AT4G30750	0	-1	0	0	0	0	1
AT4G30900	0	0	-1	0	0	0	1
AT4G30920	0	-1	0	0	0	0	1
AT4G30935	0	0	1	0	0	0	1
AT4G31040	0	-1	0	0	0	0	1
AT4G31110	0	0	0	0	0	1	1
AT4G31310	-1	0	0	0	0	0	1
AT4G31354	-1	0	0	0	0	0	1
AT4G31400	0	1	0	0	0	0	1
AT4G31510	0	-1	0	0	0	0	1
AT4G31877	-1	0	0	0	0	0	1
AT4G32105	0	0	1	0	0	0	1
AT4G32170	0	0	0	0	0	1	1
AT4G32250	0	0	-1	0	0	0	1
AT4G32430	0	1	0	0	0	0	1
AT4G32490	0	0	1	0	0	0	1
AT4G32500	0	0	0	0	0	1	1
AT4G32510	0	0	1	0	0	0	1
AT4G32620	1	0	0	0	0	0	1
AT4G32910	1	0	0	0	0	0	1
AT4G33145	0	0	1	0	0	0	1
AT4G33390	0	0	1	0	0	0	1
AT4G33430	0	0	-1	0	0	0	1
AT4G33467	0	0	-1	0	0	0	1
AT4G33490	-1	0	0	0	0	0	1
AT4G33550	0	-1	0	0	0	0	1
AT4G33660	0	-1	0	0	0	0	1
AT4G33666	0	0	-1	0	0	0	1
AT4G33800	0	0	0	0	0	1	1
AT4G33925	0	1	0	0	0	0	1
AT4G33950	0	0	-1	0	0	0	1
AT4G34100	0	-1	0	0	0	0	1
AT4G34140	-1	0	0	0	0	0	1
AT4G34170	0	0	1	0	0	0	1
AT4G34410	0	0	-1	0	0	0	1
AT4G34419	1	0	0	0	0	0	1
AT4G34460	0	0	-1	0	0	0	1
AT4G34470	0	0	1	0	0	0	1
AT4G34610	0	-1	0	0	0	0	1
AT4G34710	0	0	0	-1	0	0	1
AT4G34730	0	-1	0	0	0	0	1
AT4G34760	0	0	0	0	0	1	1
AT4G34800	0	0	0	0	1	0	1
AT4G34870	0	1	0	0	0	0	1
AT4G35030	0	-1	0	0	0	0	1
AT4G35080	0	0	1	0	0	0	1
AT4G35165	0	0	0	0	0	1	1
AT4G35290	0	0	-1	0	0	0	1
AT4G35320	-1	0	0	0	0	0	1
AT4G35530	1	0	0	0	0	0	1
AT4G35650	0	0	0	0	1	0	1
AT4G35860	0	-1	0	0	0	0	1
AT4G35987	0	0	0	0	-1	0	1
AT4G36010	0	0	0	0	-1	0	1
AT4G36070	0	0	0	0	0	1	1
AT4G36120	1	0	0	0	0	0	1
AT4G36150	0	0	-1	0	0	0	1
AT4G36160	0	1	0	0	0	0	1
AT4G36290	1	0	0	0	0	0	1
AT4G36515	0	0	-1	0	0	0	1
AT4G36810	-1	0	0	0	0	0	1
AT4G36820	1	0	0	0	0	0	1
AT4G36890	-1	0	0	0	0	0	1
AT4G36910	0	0	0	0	1	0	1
AT4G37022	-1	0	0	0	0	0	1
AT4G37100	0	1	0	0	0	0	1
AT4G37130	0	1	0	0	0	0	1
AT4G37230	0	1	0	0	0	0	1
AT4G37320	0	0	0	0	0	1	1
AT4G37410	0	0	1	0	0	0	1
AT4G37510	0	-1	0	0	0	0	1
AT4G37630	1	0	0	0	0	0	1
AT4G37640	0	0	-1	0	0	0	1
AT4G37700	-1	0	0	0	0	0	1
AT4G37860	0	0	1	0	0	0	1
AT4G37920	0	-1	0	0	0	0	1
AT4G38030	0	0	1	0	0	0	1
AT4G38160	0	0	0	0	0	1	1
AT4G38440	1	0	0	0	0	0	1
AT4G38550	0	-1	0	0	0	0	1
AT4G38560	0	0	-1	0	0	0	1
AT4G38590	0	0	0	0	0	1	1
AT4G38620	0	1	0	0	0	0	1
AT4G38640	-1	0	0	0	0	0	1
AT4G38710	0	0	0	0	0	-1	1
AT4G38730	0	0	-1	0	0	0	1
AT4G38740	0	0	0	0	0	-1	1
AT4G38870	0	0	0	0	0	1	1
AT4G38920	-1	0	0	0	0	0	1
AT4G39040	0	0	0	0	0	1	1
AT4G39170	0	1	0	0	0	0	1
AT4G39380	1	0	0	0	0	0	1
AT4G39460	0	0	1	0	0	0	1
AT4G39610	0	0	1	0	0	0	1
AT4G39795	-1	0	0	0	0	0	1
AT4G39880	0	1	0	0	0	0	1
AT4G39952	1	0	0	0	0	0	1
AT5G01030	1	0	0	0	0	0	1
AT5G01190	0	0	0	0	1	0	1
AT5G01380	0	-1	0	0	0	0	1
AT5G01460	1	0	0	0	0	0	1
AT5G01550	-1	0	0	0	0	0	1
AT5G01770	1	0	0	0	0	0	1
AT5G01910	0	0	0	0	0	-1	1
AT5G02110	0	0	0	0	0	1	1
AT5G02200	0	-1	0	0	0	0	1
AT5G02210	0	0	0	0	0	1	1
AT5G02250	0	-1	0	0	0	0	1
AT5G02440	0	1	0	0	0	0	1
AT5G02460	0	1	0	0	0	0	1
AT5G02490	0	0	-1	0	0	0	1
AT5G02850	0	1	0	0	0	0	1
AT5G02890	0	1	0	0	0	0	1
AT5G02990	0	0	0	0	0	1	1
AT5G03000	0	0	0	0	1	0	1
AT5G03080	-1	0	0	0	0	0	1
AT5G03230	0	0	0	0	-1	0	1
AT5G03280	0	0	-1	0	0	0	1
AT5G03350	0	0	0	-1	0	0	1
AT5G03370	-1	0	0	0	0	0	1
AT5G03430	-1	0	0	0	0	0	1
AT5G03435	0	0	-1	0	0	0	1
AT5G03480	0	0	0	0	0	1	1
AT5G03510	0	0	1	0	0	0	1
AT5G03560	0	-1	0	0	0	0	1
AT5G03990	0	0	-1	0	0	0	1
AT5G04250	0	0	0	0	1	0	1
AT5G04370	0	0	0	0	0	1	1
AT5G04400	0	0	0	0	1	0	1
AT5G04480	0	-1	0	0	0	0	1
AT5G04540	0	-1	0	0	0	0	1
AT5G04950	0	0	-1	0	0	0	1
AT5G05160	0	0	0	0	0	-1	1
AT5G05340	0	0	-1	0	0	0	1
AT5G05350	0	0	1	0	0	0	1
AT5G05740	0	0	0	0	0	1	1
AT5G06220	0	-1	0	0	0	0	1
AT5G06260	-1	0	0	0	0	0	1
AT5G06450	0	0	-1	0	0	0	1
AT5G06790	-1	0	0	0	0	0	1
AT5G06810	0	1	0	0	0	0	1
AT5G06820	0	-1	0	0	0	0	1
AT5G06839	0	0	0	0	1	0	1
AT5G06920	0	0	1	0	0	0	1
AT5G06960	0	0	-1	0	0	0	1
AT5G07420	0	0	0	0	0	1	1
AT5G07490	0	0	0	0	0	1	1
AT5G07540	0	0	0	0	0	1	1
AT5G07570	0	0	1	0	0	0	1
AT5G07572	0	0	1	0	0	0	1
AT5G07780	0	0	0	0	0	1	1
AT5G07790	0	0	0	0	-1	0	1
AT5G08120	0	1	0	0	0	0	1
AT5G08185	-1	0	0	0	0	0	1
AT5G08250	0	0	0	0	0	1	1
AT5G08305	1	0	0	0	0	0	1
AT5G08330	0	0	-1	0	0	0	1
AT5G08415	0	0	0	0	1	0	1
AT5G08680	-1	0	0	0	0	0	1
AT5G08712	0	0	0	1	0	0	1
AT5G08740	0	-1	0	0	0	0	1
AT5G09370	0	0	1	0	0	0	1
AT5G09440	0	0	-1	0	0	0	1
AT5G09460	0	0	0	0	0	-1	1
AT5G09520	0	0	1	0	0	0	1
AT5G09540	1	0	0	0	0	0	1
AT5G09560	0	0	1	0	0	0	1
AT5G09600	-1	0	0	0	0	0	1
AT5G09670	0	0	-1	0	0	0	1
AT5G10010	0	1	0	0	0	0	1
AT5G10110	0	1	0	0	0	0	1
AT5G10150	0	0	0	0	1	0	1
AT5G10278	0	0	0	0	0	1	1
AT5G10450	0	-1	0	0	0	0	1
AT5G10570	0	0	-1	0	0	0	1
AT5G10625	0	0	-1	0	0	0	1
AT5G11130	0	0	0	0	0	1	1
AT5G11170	1	0	0	0	0	0	1
AT5G11260	1	0	0	0	0	0	1
AT5G11400	0	0	1	0	0	0	1
AT5G11412	0	0	0	0	0	1	1
AT5G11440	0	0	1	0	0	0	1
AT5G11540	0	0	1	0	0	0	1
AT5G11900	0	1	0	0	0	0	1
AT5G12480	0	0	-1	0	0	0	1
AT5G13150	0	0	1	0	0	0	1
AT5G13460	1	0	0	0	0	0	1
AT5G13900	0	0	0	0	0	1	1
AT5G14010	0	0	1	0	0	0	1
AT5G14090	0	-1	0	0	0	0	1
AT5G14170	1	0	0	0	0	0	1
AT5G14290	0	0	1	0	0	0	1
AT5G14300	0	0	1	0	0	0	1
AT5G14380	0	0	1	0	0	0	1
AT5G14602	0	0	1	0	0	0	1
AT5G14670	0	0	0	0	1	0	1
AT5G14800	0	0	1	0	0	0	1
AT5G14830	0	1	0	0	0	0	1
AT5G14850	1	0	0	0	0	0	1
AT5G14860	0	0	0	0	0	1	1
AT5G14950	0	0	-1	0	0	0	1
AT5G15010	0	1	0	0	0	0	1
AT5G15110	0	0	1	0	0	0	1
AT5G15280	0	1	0	0	0	0	1
AT5G15340	0	1	0	0	0	0	1
AT5G15380	0	0	0	0	1	0	1
AT5G15480	0	0	1	0	0	0	1
AT5G15490	0	0	0	0	1	0	1
AT5G15500	0	0	-1	0	0	0	1
AT5G15620	0	0	1	0	0	0	1
AT5G15730	0	0	-1	0	0	0	1
AT5G15853	0	-1	0	0	0	0	1
AT5G15940	1	0	0	0	0	0	1
AT5G16020	0	0	0	0	0	1	1
AT5G16080	0	-1	0	0	0	0	1
AT5G16110	0	-1	0	0	0	0	1
AT5G16120	0	-1	0	0	0	0	1
AT5G16440	0	0	1	0	0	0	1
AT5G16560	0	0	0	0	0	-1	1
AT5G16650	0	-1	0	0	0	0	1
AT5G16680	0	-1	0	0	0	0	1
AT5G16770	0	0	-1	0	0	0	1
AT5G16960	0	0	1	0	0	0	1
AT5G17030	0	0	0	0	0	1	1
AT5G17040	0	-1	0	0	0	0	1
AT5G17050	0	0	-1	0	0	0	1
AT5G17080	0	1	0	0	0	0	1
AT5G17180	0	0	1	0	0	0	1
AT5G17200	0	0	0	0	0	1	1
AT5G17500	0	0	1	0	0	0	1
AT5G17590	0	0	0	0	1	0	1
AT5G17760	0	1	0	0	0	0	1
AT5G17770	0	0	1	0	0	0	1
AT5G18010	0	-1	0	0	0	0	1
AT5G18050	-1	0	0	0	0	0	1
AT5G18060	0	-1	0	0	0	0	1
AT5G18150	0	0	-1	0	0	0	1
AT5G18180	0	0	1	0	0	0	1
AT5G18202	0	0	1	0	0	0	1
AT5G18400	0	0	-1	0	0	0	1
AT5G18407	-1	0	0	0	0	0	1
AT5G18525	0	-1	0	0	0	0	1
AT5G19310	0	1	0	0	0	0	1
AT5G19320	0	1	0	0	0	0	1
AT5G19460	0	-1	0	0	0	0	1
AT5G19470	0	-1	0	0	0	0	1
AT5G19510	1	0	0	0	0	0	1
AT5G19530	0	1	0	0	0	0	1
AT5G19600	0	0	1	0	0	0	1
AT5G19640	0	0	0	0	0	1	1
AT5G19660	-1	0	0	0	0	0	1
AT5G19870	-1	0	0	0	0	0	1
AT5G20170	1	0	0	0	0	0	1
AT5G20260	0	0	1	0	0	0	1
AT5G20610	0	0	-1	0	0	0	1
AT5G20885	0	1	0	0	0	0	1
AT5G20960	0	0	-1	0	0	0	1
AT5G21030	-1	0	0	0	0	0	1
AT5G21222	0	-1	0	0	0	0	1
AT5G21960	0	0	0	-1	0	0	1
AT5G22060	0	0	-1	0	0	0	1
AT5G22200	0	0	0	0	1	0	1
AT5G22260	0	0	1	0	0	0	1
AT5G22340	0	0	0	0	0	1	1
AT5G22530	-1	0	0	0	0	0	1
AT5G22570	0	0	-1	0	0	0	1
AT5G22670	0	0	0	0	0	1	1
AT5G22960	0	0	1	0	0	0	1
AT5G23170	0	0	0	0	1	0	1
AT5G23180	0	0	1	0	0	0	1
AT5G23520	0	0	-1	0	0	0	1
AT5G23820	0	0	0	0	-1	0	1
AT5G23960	0	0	0	0	0	1	1
AT5G24090	0	0	1	0	0	0	1
AT5G24165	-1	0	0	0	0	0	1
AT5G24270	-1	0	0	0	0	0	1
AT5G24470	0	0	0	-1	0	0	1
AT5G24600	0	1	0	0	0	0	1
AT5G24660	0	0	-1	0	0	0	1
AT5G24790	0	0	0	0	1	0	1
AT5G24800	0	0	0	0	0	1	1
AT5G24870	-1	0	0	0	0	0	1
AT5G25010	-1	0	0	0	0	0	1
AT5G25070	-1	0	0	0	0	0	1
AT5G25190	0	0	-1	0	0	0	1
AT5G25290	0	0	0	0	1	0	1
AT5G25450	0	-1	0	0	0	0	1
AT5G25480	1	0	0	0	0	0	1
AT5G25530	0	0	0	0	1	0	1
AT5G25550	0	0	0	0	1	0	1
AT5G25757	0	1	0	0	0	0	1
AT5G26000	0	0	0	0	0	1	1
AT5G26010	-1	0	0	0	0	0	1
AT5G26160	0	0	1	0	0	0	1
AT5G26220	0	0	0	0	0	-1	1
AT5G26731	1	0	0	0	0	0	1
AT5G26749	0	1	0	0	0	0	1
AT5G26780	0	1	0	0	0	0	1
AT5G26790	0	1	0	0	0	0	1
AT5G26820	0	-1	0	0	0	0	1
AT5G26910	1	0	0	0	0	0	1
AT5G26940	0	0	0	0	1	0	1
AT5G27030	0	1	0	0	0	0	1
AT5G27060	0	0	-1	0	0	0	1
AT5G27290	0	0	0	0	0	1	1
AT5G27380	0	-1	0	0	0	0	1
AT5G27490	0	0	1	0	0	0	1
AT5G27600	0	0	-1	0	0	0	1
AT5G27660	1	0	0	0	0	0	1
AT5G27730	0	0	0	0	-1	0	1
AT5G27750	1	0	0	0	0	0	1
AT5G27910	0	0	1	0	0	0	1
AT5G27927	0	0	-1	0	0	0	1
AT5G28010	0	0	-1	0	0	0	1
AT5G28470	0	0	1	0	0	0	1
AT5G28530	0	1	0	0	0	0	1
AT5G28888	0	0	1	0	0	0	1
AT5G28919	0	0	0	0	1	0	1
AT5G28920	0	0	0	0	1	0	1
AT5G30500	0	0	0	0	1	0	1
AT5G33432	0	-1	0	0	0	0	1
AT5G34940	1	0	0	0	0	0	1
AT5G35400	0	1	0	0	0	0	1
AT5G35510	-1	0	0	0	0	0	1
AT5G35550	0	0	0	1	0	0	1
AT5G35560	0	0	-1	0	0	0	1
AT5G35580	0	0	-1	0	0	0	1
AT5G35600	0	0	1	0	0	0	1
AT5G35601	0	-1	0	0	0	0	1
AT5G35680	0	0	-1	0	0	0	1
AT5G35700	0	0	0	0	1	0	1
AT5G35740	0	0	0	0	0	1	1
AT5G36100	0	0	0	0	0	1	1
AT5G36910	0	0	0	0	0	1	1
AT5G36960	0	0	0	0	-1	0	1
AT5G37050	1	0	0	0	0	0	1
AT5G37072	0	0	1	0	0	0	1
AT5G37130	1	0	0	0	0	0	1
AT5G37550	0	-1	0	0	0	0	1
AT5G37660	0	0	0	0	0	-1	1
AT5G37860	0	0	0	0	1	0	1
AT5G38100	1	0	0	0	0	0	1
AT5G38130	0	0	0	0	1	0	1
AT5G38230	0	-1	0	0	0	0	1
AT5G38240	0	0	-1	0	0	0	1
AT5G38250	0	0	-1	0	0	0	1
AT5G38435	0	0	0	0	0	1	1
AT5G38450	0	0	0	0	0	1	1
AT5G38700	0	0	-1	0	0	0	1
AT5G38730	0	1	0	0	0	0	1
AT5G38760	0	0	0	0	0	1	1
AT5G38930	1	0	0	0	0	0	1
AT5G39010	0	0	0	0	1	0	1
AT5G39120	-1	0	0	0	0	0	1
AT5G39340	0	0	-1	0	0	0	1
AT5G39350	1	0	0	0	0	0	1
AT5G39450	0	0	-1	0	0	0	1
AT5G39720	0	0	-1	0	0	0	1
AT5G39910	0	0	0	0	0	1	1
AT5G40020	0	-1	0	0	0	0	1
AT5G40330	-1	0	0	0	0	0	1
AT5G40400	0	1	0	0	0	0	1
AT5G40600	0	0	1	0	0	0	1
AT5G40620	0	0	0	0	0	1	1
AT5G40900	0	-1	0	0	0	0	1
AT5G40940	0	0	0	0	0	1	1
AT5G41260	0	0	-1	0	0	0	1
AT5G41380	0	1	0	0	0	0	1
AT5G41610	1	0	0	0	0	0	1
AT5G41612	0	1	0	0	0	0	1
AT5G41685	0	1	0	0	0	0	1
AT5G41730	0	0	0	0	0	1	1
AT5G41780	0	0	1	0	0	0	1
AT5G41820	0	0	1	0	0	0	1
AT5G41992	-1	0	0	0	0	0	1
AT5G42170	0	0	0	0	0	1	1
AT5G42430	0	0	1	0	0	0	1
AT5G42445	0	0	0	0	0	1	1
AT5G42510	0	0	0	0	0	1	1
AT5G42690	0	0	0	0	0	1	1
AT5G43010	0	1	0	0	0	0	1
AT5G43180	-1	0	0	0	0	0	1
AT5G43270	0	0	0	0	1	0	1
AT5G43285	0	0	1	0	0	0	1
AT5G43290	0	0	0	0	0	1	1
AT5G43340	0	0	0	0	0	1	1
AT5G43400	0	0	1	0	0	0	1
AT5G43580	0	0	0	0	1	0	1
AT5G43620	0	-1	0	0	0	0	1
AT5G43640	0	0	1	0	0	0	1
AT5G43695	0	0	0	0	0	1	1
AT5G43745	0	0	0	0	0	1	1
AT5G43760	0	-1	0	0	0	0	1
AT5G43790	0	1	0	0	0	0	1
AT5G43840	0	-1	0	0	0	0	1
AT5G44120	0	0	0	0	0	1	1
AT5G44210	0	0	-1	0	0	0	1
AT5G44255	0	-1	0	0	0	0	1
AT5G44265	0	0	1	0	0	0	1
AT5G44300	0	0	0	0	0	1	1
AT5G44410	0	-1	0	0	0	0	1
AT5G44575	-1	0	0	0	0	0	1
AT5G44585	-1	0	0	0	0	0	1
AT5G44690	0	0	1	0	0	0	1
AT5G44720	0	0	-1	0	0	0	1
AT5G44960	0	0	1	0	0	0	1
AT5G44980	0	0	1	0	0	0	1
AT5G45130	0	0	-1	0	0	0	1
AT5G45150	1	0	0	0	0	0	1
AT5G45210	0	0	0	0	0	1	1
AT5G45220	0	0	-1	0	0	0	1
AT5G45490	-1	0	0	0	0	0	1
AT5G45710	0	-1	0	0	0	0	1
AT5G45730	0	0	1	0	0	0	1
AT5G45860	0	0	0	0	-1	0	1
AT5G45910	0	0	1	0	0	0	1
AT5G46290	0	0	1	0	0	0	1
AT5G46580	0	0	0	0	0	1	1
AT5G46795	0	0	0	0	0	1	1
AT5G46950	0	0	0	0	1	0	1
AT5G47077	-1	0	0	0	0	0	1
AT5G47110	0	-1	0	0	0	0	1
AT5G47580	0	0	-1	0	0	0	1
AT5G47920	0	0	1	0	0	0	1
AT5G48230	0	0	1	0	0	0	1
AT5G48410	-1	0	0	0	0	0	1
AT5G48440	0	0	-1	0	0	0	1
AT5G48470	0	0	1	0	0	0	1
AT5G48590	0	-1	0	0	0	0	1
AT5G48780	0	-1	0	0	0	0	1
AT5G49030	0	-1	0	0	0	0	1
AT5G49210	0	1	0	0	0	0	1
AT5G49215	0	0	0	0	0	-1	1
AT5G49250	0	0	1	0	0	0	1
AT5G49260	0	0	1	0	0	0	1
AT5G49270	0	0	0	0	1	0	1
AT5G49310	0	0	1	0	0	0	1
AT5G49340	0	0	1	0	0	0	1
AT5G49370	0	0	1	0	0	0	1
AT5G49390	0	0	1	0	0	0	1
AT5G50030	0	0	1	0	0	0	1
AT5G50040	0	0	0	0	0	1	1
AT5G50150	1	0	0	0	0	0	1
AT5G50290	0	1	0	0	0	0	1
AT5G50480	0	0	1	0	0	0	1
AT5G50800	0	0	-1	0	0	0	1
AT5G50890	1	0	0	0	0	0	1
AT5G51060	0	0	1	0	0	0	1
AT5G51080	1	0	0	0	0	0	1
AT5G51210	1	0	0	0	0	0	1
AT5G51310	-1	0	0	0	0	0	1
AT5G51330	0	0	1	0	0	0	1
AT5G51340	0	0	0	0	-1	0	1
AT5G51500	0	0	1	0	0	0	1
AT5G51770	0	0	-1	0	0	0	1
AT5G52055	0	0	1	0	0	0	1
AT5G52230	1	0	0	0	0	0	1
AT5G52300	0	0	-1	0	0	0	1
AT5G52330	0	0	1	0	0	0	1
AT5G52730	-1	0	0	0	0	0	1
AT5G52770	-1	0	0	0	0	0	1
AT5G52810	0	0	-1	0	0	0	1
AT5G52920	0	0	1	0	0	0	1
AT5G53170	0	-1	0	0	0	0	1
AT5G53310	0	0	-1	0	0	0	1
AT5G53520	0	0	1	0	0	0	1
AT5G53530	0	0	-1	0	0	0	1
AT5G53570	0	0	0	0	-1	0	1
AT5G53700	0	0	1	0	0	0	1
AT5G53820	0	0	1	0	0	0	1
AT5G53900	0	1	0	0	0	0	1
AT5G54062	0	0	0	0	1	0	1
AT5G54095	0	0	1	0	0	0	1
[truncated: 12,460 more rows]
