# Supplementary material
Source: MDPI journal article supplement (https://www.mdpi.com/2075-4655/1/2/8)
Supplement: s1 [file s1 › Supplementary/Tables-S1to6/Table_S2.xls]

## Sheet: L>t0
	biological process
GO-term ID	Term	Tested_list_percentage	Genome_percentage	adj_pvalue
GO:0000041	transition metal ion transport	0.51	0.27	0.0164665
GO:0000103	sulfate assimilation	0.12	0.03	0.0273139
GO:0000160	phosphorelay signal transduction system	1.11	0.6	0.000442486
GO:0000271	polysaccharide biosynthetic process	0.65	0.4	0.0354006
GO:0000272	polysaccharide catabolic process	0.39	0.21	0.0474914
GO:0000273	lipoate metabolic process	0.07	0.01	0.0426869
GO:0000302	response to reactive oxygen species	0.67	0.39	0.017575
GO:0005976	polysaccharide metabolic process	1.2	0.73	0.00253368
GO:0005978	glycogen biosynthetic process	0.14	0.03	0.0164665
GO:0005982	starch metabolic process	0.32	0.07	7.41787e-05
GO:0005983	starch catabolic process	0.14	0.02	0.00341199
GO:0005985	sucrose metabolic process	0.14	0.03	0.0246098
GO:0006006	glucose metabolic process	0.72	0.42	0.0121391
GO:0006007	glucose catabolic process	0.62	0.37	0.0323548
GO:0006032	chitin catabolic process	0.18	0.06	0.0426869
GO:0006066	alcohol metabolic process	1.99	1.18	2.93417e-05
GO:0006073	cellular glucan metabolic process	0.72	0.36	0.00184623
GO:0006081	cellular aldehyde metabolic process	0.21	0.06	0.00988802
GO:0006096	glycolytic process	0.49	0.29	0.049992
GO:0006163	purine nucleotide metabolic process	0.99	0.5	0.000264237
GO:0006164	purine nucleotide biosynthetic process	0.95	0.49	0.000422995
GO:0006457	protein folding	1.2	0.8	0.0135849
GO:0006470	protein dephosphorylation	0.62	0.16	1.78114e-07
GO:0006519	cellular amino acid metabolic process	3.29	1.82	4.53549e-10
GO:0006520	cellular amino acid metabolic process	2.16	1.14	9.28582e-08
GO:0006534	cysteine metabolic process	0.23	0.04	0.000314371
GO:0006536	glutamate metabolic process	0.14	0.03	0.0164665
GO:0006551	leucine metabolic process	0.12	0.03	0.0400686
GO:0006568	tryptophan metabolic process	0.21	0.04	0.00140513
GO:0006595	polyamine metabolic process	0.14	0.03	0.0246098
GO:0006623	protein targeting to vacuole	0.14	0.04	0.0452873
GO:0006629	lipid metabolic process	3.96	2.38	1.9511e-09
GO:0006631	fatty acid metabolic process	1.09	0.61	0.000884639
GO:0006662	glycerol ether metabolic process	0.11	0.02	0.0282431
GO:0006665	sphingolipid metabolic process	0.16	0.05	0.049992
GO:0006721	terpenoid metabolic process	0.49	0.29	0.0452267
GO:0006725	cellular aromatic compound metabolic process	2.46	1.22	4.07142e-10
GO:0006772	thiamine metabolic process	0.12	0.02	0.00558
GO:0006779	porphyrin-containing compound biosynthetic process	0.44	0.14	0.000285986
GO:0006783	heme biosynthetic process	0.14	0.01	0.000285986
GO:0006790	sulfur compound metabolic process	1.51	0.35	4.20122e-19
GO:0006811	ion transport	3.68	1.74	2.50781e-16
GO:0006812	cation transport	2.9	1.46	2.18071e-11
GO:0006813	potassium ion transport	0.74	0.33	0.000285986
GO:0006814	sodium ion transport	0.33	0.09	0.000353506
GO:0006820	anion transport	0.6	0.24	0.000388316
GO:0006821	chloride transport	0.14	0.04	0.0346836
GO:0006825	copper ion transport	0.23	0.09	0.0253562
GO:0006835	dicarboxylic acid transport	0.44	0.24	0.0337916
GO:0006855	drug transmembrane transport	0.46	0.19	0.00331567
GO:0006857	oligopeptide transport	0.53	0.16	1.45967e-05
GO:0006865	amino acid transport	0.62	0.14	4.93065e-08
GO:0006873	cellular ion homeostasis	0.42	0.23	0.0402254
GO:0006875	cellular metal ion homeostasis	0.26	0.11	0.0271075
GO:0006914	autophagy	0.19	0.04	0.00361216
GO:0006915	apoptotic process	1.62	0.35	1.53245e-21
GO:0006952	defense response	5.98	1.91	1.3841e-51
GO:0006955	immune response	2.73	0.72	1.01245e-29
GO:0006970	response to osmotic stress	2.59	0.95	2.28702e-18
GO:0006972	hyperosmotic response	0.35	0.11	0.00111373
GO:0006979	response to oxidative stress	1.92	0.68	2.12983e-14
GO:0006995	cellular response to nitrogen starvation	0.09	0.01	0.0273505
GO:0007031	peroxisome organization	0.18	0.06	0.0426869
GO:0007242	intracellular signal transduction	4.05	2.96	0.000203805
GO:0007243	intracellular signal transduction	0.11	0.02	0.0282431
GO:0007568	aging	0.49	0.17	0.000287193
GO:0007623	circadian rhythm	0.32	0.11	0.00361216
GO:0008037	cell recognition	0.3	0.11	0.00742368
GO:0008219	cell death	2.46	0.52	1.71983e-33
GO:0008272	sulfate transport	0.14	0.03	0.0164665
GO:0008610	lipid biosynthetic process	1.95	1.35	0.00292271
GO:0008615	pyridoxine biosynthetic process	0.09	0.01	0.0135849
GO:0008643	carbohydrate transport	0.56	0.24	0.00104084
GO:0008652	cellular amino acid biosynthetic process	1	0.5	0.000188347
GO:0009062	fatty acid catabolic process	0.28	0.07	0.00104084
GO:0009063	cellular amino acid catabolic process	0.42	0.08	7.26892e-07
GO:0009069	serine family amino acid metabolic process	0.35	0.12	0.00199143
GO:0009072	aromatic amino acid family metabolic process	0.48	0.13	2.23123e-05
GO:0009073	aromatic amino acid family biosynthetic process	0.28	0.12	0.0221745
GO:0009081	branched-chain amino acid metabolic process	0.21	0.09	0.045286
GO:0009105	lipoate biosynthetic process	0.07	0.01	0.0426869
GO:0009107	lipoate biosynthetic process	0.07	0.01	0.0426869
GO:0009117	nucleotide metabolic process	1.43	0.77	4.79949e-05
GO:0009165	nucleotide biosynthetic process	1.06	0.59	0.00109976
GO:0009228	thiamine biosynthetic process	0.11	0.01	0.00868959
GO:0009239	enterobactin biosynthetic process	0.44	0.22	0.0164665
GO:0009250	glucan biosynthetic process	0.42	0.24	0.049019
GO:0009259	ribonucleotide metabolic process	0.97	0.5	0.000459592
GO:0009266	response to temperature stimulus	2.45	1.1	2.49149e-12
GO:0009267	cellular response to starvation	0.44	0.13	0.000115441
GO:0009269	response to desiccation	0.21	0.02	7.157e-05
GO:0009308	amine metabolic process	2.76	1.46	1.36719e-09
GO:0009311	oligosaccharide metabolic process	0.33	0.12	0.00517251
GO:0009314	response to radiation	2.8	1.23	1.32418e-14
GO:0009407	toxin catabolic process	0.42	0.09	2.0848e-06
GO:0009408	response to heat	0.6	0.33	0.0171242
GO:0009409	response to cold	1.85	0.77	1.03112e-10
GO:0009411	response to UV	0.39	0.19	0.0282431
GO:0009414	response to water deprivation	1.37	0.35	1.02599e-15
GO:0009415	response to water	1.43	0.37	5.51697e-16
GO:0009416	response to light stimulus	2.8	1.18	9.03462e-16
GO:0009605	response to external stimulus	2.52	0.91	2.28702e-18
GO:0009606	tropism	0.26	0.12	0.045286
GO:0009607	response to biotic stimulus	4.43	1.17	3.53514e-48
GO:0009610	response to symbiotic fungus	0.09	0.02	0.0452267
GO:0009611	response to wounding	1.32	0.37	1.01264e-13
GO:0009617	response to bacterium	2.22	0.44	9.46612e-32
GO:0009620	response to fungus	1.21	0.22	6.74963e-19
GO:0009624	response to nematode	0.44	0.12	2.88133e-05
GO:0009625	response to insect	0.14	0.02	0.00626227
GO:0009626	plant-type hypersensitive response	0.48	0.07	7.57283e-09
GO:0009627	systemic acquired resistance	0.26	0.06	0.000781715
GO:0009631	cold acclimation	0.23	0.03	4.66646e-05
GO:0009636	response to toxic substance	0.72	0.16	1.45232e-09
GO:0009637	response to blue light	0.49	0.09	9.57237e-08
GO:0009638	phototropism	0.16	0.01	0.000224941
GO:0009639	response to red or far red light	0.97	0.44	3.5401e-05
GO:0009642	response to light intensity	0.58	0.15	4.96473e-07
GO:0009644	response to high light intensity	0.37	0.09	4.20459e-05
GO:0009651	response to salt stress	2.36	0.89	3.77506e-16
GO:0009657	plastid organization	0.69	0.19	1.67687e-07
GO:0009658	chloroplast organization	0.4	0.12	0.000216202
GO:0009684	indoleacetic acid biosynthetic process	0.14	0.01	0.000285986
GO:0009697	salicylic acid biosynthetic process	0.07	0.01	0.0426869
GO:0009699	phenylpropanoid biosynthetic process	0.62	0.38	0.0458748
GO:0009700	indole phytoalexin biosynthetic process	0.11	0.01	0.00868959
GO:0009723	response to ethylene	1.39	0.68	3.15866e-06
GO:0009725	response to hormone	4.75	2.49	2.07898e-16
GO:0009733	response to auxin	1.46	0.98	0.00729325
GO:0009737	response to abscisic acid	1.95	0.7	1.20326e-14
GO:0009738	abscisic acid-activated signaling pathway	0.48	0.25	0.0238295
GO:0009739	response to gibberellin	0.58	0.34	0.0284921
GO:0009743	response to carbohydrate	1.74	0.37	2.3225e-23
GO:0009751	response to salicylic acid	1.07	0.32	2.29664e-10
GO:0009753	response to jasmonic acid	1.18	0.33	2.71915e-12
GO:0009755	hormone-mediated signaling pathway	2.01	1.3	0.000439732
GO:0009765	photosynthesis, light harvesting	0.49	0.02	9.03462e-16
GO:0009767	photosynthetic electron transport chain	0.42	0.05	1.52242e-08
GO:0009773	photosynthetic electron transport in photosystem I	0.21	0.01	9.1156e-07
GO:0009814	defense response, incompatible interaction	0.97	0.15	1.19426e-16
GO:0009816	defense response to bacterium, incompatible interaction	0.33	0.03	2.03554e-08
GO:0009817	defense response to fungus, incompatible interaction	0.3	0.03	7.2311e-07
GO:0009820	alkaloid metabolic process	0.42	0.14	0.000436968
GO:0009821	alkaloid biosynthetic process	0.14	0.02	0.00341199
GO:0009835	fruit ripening	0.11	0.02	0.0428611
GO:0009850	auxin metabolic process	0.26	0.09	0.00621826
GO:0009851	auxin biosynthetic process	0.19	0.04	0.00234885
GO:0009853	photorespiration	0.28	0.1	0.00875043
GO:0009862	systemic acquired resistance, salicylic acid mediated signaling pathway	0.11	0.02	0.0428611
GO:0009863	salicylic acid mediated signaling pathway	0.21	0.06	0.00726922
GO:0009873	ethylene-activated signaling pathway	0.9	0.46	0.000620012
GO:0009875	pollen-pistil interaction	0.26	0.1	0.0171591
GO:0009902	chloroplast relocation	0.09	0.01	0.0135849
GO:0009970	cellular response to sulfate starvation	0.12	0.02	0.0101331
GO:0010017	red or far-red light signaling pathway	0.33	0.17	0.0470874
GO:0010027	thylakoid membrane organization	0.18	0.03	0.00131165
GO:0010038	response to metal ion	2.23	1.03	1.06857e-10
GO:0010109	regulation of photosynthesis	0.23	0.01	8.65134e-07
GO:0010114	response to red light	0.6	0.08	8.39096e-12
GO:0010118	stomatal movement	0.33	0.1	0.000702629
GO:0010119	regulation of stomatal movement	0.18	0.06	0.0338384
GO:0010120	camalexin biosynthetic process	0.09	0.01	0.0273505
GO:0010149	senescence	0.23	0.07	0.00868959
GO:0010167	response to nitrate	0.14	0.02	0.00341199
GO:0010188	response to microbial phytotoxin	0.11	0	0.000285986
GO:0010190	cytochrome b6f complex assembly	0.07	0.01	0.0426869
GO:0010193	response to ozone	0.23	0.05	0.000871202
GO:0010200	response to chitin	1.43	0.18	4.48946e-28
GO:0010205	photoinhibition	0.12	0	6.01812e-05
GO:0010206	photosystem II repair	0.07	0	0.0196299
GO:0010207	photosystem II assembly	0.11	0.01	0.00868959
GO:0010218	response to far red light	0.39	0.08	5.94797e-06
GO:0010304	PSII associated light-harvesting complex II catabolic process	0.07	0.01	0.0426869
GO:0012501	programmed cell death	2.23	0.44	6.33369e-32
GO:0015706	nitrate transport	0.11	0.01	0.00868959
GO:0015743	malate transport	0.07	0	0.0196299
GO:0015804	neutral amino acid transport	0.07	0.01	0.0426869
GO:0015833	peptide transport	0.53	0.17	5.16428e-05
GO:0015977	carbon fixation	0.23	0.03	0.000185205
GO:0015979	photosynthesis	2.09	0.3	7.13766e-38
GO:0015992	proton transport	0.63	0.31	0.00341199
GO:0015994	chlorophyll metabolic process	0.51	0.12	6.93228e-07
GO:0015995	chlorophyll biosynthetic process	0.33	0.1	0.00131165
GO:0015996	chlorophyll catabolic process	0.14	0.01	0.000285986
GO:0016042	lipid catabolic process	1.06	0.58	0.000866438
GO:0016051	carbohydrate biosynthetic process	1.67	0.72	3.04801e-09
GO:0016052	carbohydrate catabolic process	1.14	0.63	0.000517427
GO:0016116	carotenoid metabolic process	0.25	0.07	0.00274369
GO:0016192	vesicle-mediated transport	1.3	0.94	0.0402628
GO:0016226	iron-sulfur cluster assembly	0.21	0.03	0.000498305
GO:0016311	dephosphorylation	0.69	0.2	3.42879e-07
GO:0016559	peroxisome fission	0.09	0.02	0.0452267
GO:0016998	cell wall macromolecule catabolic process	0.26	0.07	0.00239764
GO:0018298	protein-chromophore linkage	0.26	0.05	0.000121849
GO:0019252	starch biosynthetic process	0.16	0.03	0.00988802
GO:0019253	reductive pentose-phosphate cycle	0.21	0.01	9.1156e-07
GO:0019318	hexose metabolic process	0.99	0.53	0.00089419
GO:0019320	hexose catabolic process	0.62	0.37	0.0356593
GO:0019395	fatty acid oxidation	0.23	0.08	0.0154683
GO:0019684	photosynthesis, light reaction	1.16	0.14	1.00032e-23
GO:0019685	photosynthesis, dark reaction	0.23	0.01	2.15802e-07
GO:0019725	cellular homeostasis	1.62	0.54	1.93574e-13
GO:0019748	secondary metabolic process	2.66	1.12	5.51375e-15
GO:0019752	carboxylic acid metabolic process	4.26	2.25	1.32418e-14
GO:0019760	glucosinolate metabolic process	0.49	0.07	2.36029e-09
GO:0022900	electron transport chain	1.41	0.48	2.37744e-11
GO:0030001	metal ion transport	2.11	0.98	4.2826e-10
GO:0030003	cellular cation homeostasis	0.39	0.19	0.0282431
GO:0030149	sphingolipid catabolic process	0.07	0	0.0196299
GO:0030259	lipid glycosylation	0.07	0	0.0196299
GO:0030968	endoplasmic reticulum unfolded protein response	0.07	0.01	0.0426869
GO:0031347	regulation of defense response	0.35	0.14	0.00540761
GO:0031348	negative regulation of defense response	0.16	0.02	0.00215029
GO:0031407	oxylipin metabolic process	0.3	0.06	7.42564e-05
GO:0033014	tetrapyrrole biosynthetic process	0.48	0.16	0.000156968
GO:0034050	host programmed cell death induced by symbiont	0.48	0.07	1.48923e-08
GO:0034976	response to endoplasmic reticulum stress	0.14	0.02	0.00626227
GO:0040034	regulation of development, heterochronic	0.19	0.05	0.00828862
GO:0042128	nitrate assimilation	0.16	0.02	0.00215029
GO:0042325	regulation of phosphorylation	0.25	0.07	0.00540761
GO:0042362	fat-soluble vitamin biosynthetic process	0.12	0.02	0.0171591
GO:0042398	cellular modified amino acid biosynthetic process	1.04	0.55	0.000456317
GO:0042493	response to drug	0.6	0.27	0.00150789
GO:0042538	hyperosmotic salinity response	0.33	0.09	0.000353506
GO:0042545	cell wall modification	0.63	0.38	0.0338384
GO:0042548	regulation of photosynthesis, light reaction	0.19	0.01	1.52467e-05
GO:0042594	response to starvation	0.51	0.14	8.11196e-06
GO:0042742	defense response to bacterium	1.78	0.3	6.28499e-29
GO:0042819	vitamin B6 biosynthetic process	0.09	0.01	0.0135849
GO:0042981	regulation of apoptotic process	0.14	0.03	0.0164665
GO:0043043	peptide biosynthetic process	0.49	0.23	0.00570816
GO:0043067	regulation of programmed cell death	0.28	0.05	4.24306e-05
GO:0043069	negative regulation of programmed cell death	0.14	0.02	0.00341199
GO:0043085	positive regulation of catalytic activity	0.28	0.05	7.36929e-05
GO:0043241	protein complex disassembly	0.19	0.07	0.0362836
GO:0043269	regulation of ion transport	0.09	0.02	0.0452267
GO:0043562	cellular response to nitrogen levels	0.11	0.02	0.0282431
GO:0044262	cellular carbohydrate metabolic process	2.66	1.42	4.07774e-09
GO:0045087	innate immune response	2.6	0.56	7.82335e-35
GO:0045454	cell redox homeostasis	1.16	0.3	4.40268e-13
GO:0045730	respiratory burst	0.09	0	0.0012452
GO:0045962	positive regulation of development, heterochronic	0.11	0	0.00131165
GO:0046466	membrane lipid catabolic process	0.07	0.01	0.0426869
GO:0046685	response to arsenic-containing substance	0.11	0.01	0.00868959
GO:0046686	response to cadmium ion	1.92	0.85	5.26938e-10
GO:0048544	recognition of pollen	0.26	0.08	0.00338403
GO:0050790	regulation of catalytic activity	0.79	0.42	0.00215029
GO:0050832	defense response to fungus	0.86	0.15	4.09975e-14
GO:0051246	regulation of protein metabolic process	0.56	0.29	0.00951041
GO:0051347	positive regulation of transferase activity	0.16	0.03	0.00374113
GO:0051707	response to other organism	4.15	1	1.02766e-49
GO:0052386	cell wall thickening	0.25	0.02	2.12112e-06
GO:0052542	defense response by callose deposition	0.26	0.01	4.93065e-08
GO:0052543	callose deposition in cell wall	0.23	0.02	8.26404e-06
GO:0052544	defense response by callose deposition in cell wall	0.23	0.01	8.65134e-07
GO:0055085	transmembrane transport	1.58	0.63	4.83397e-10
	cellular component
GO-term ID	Term	Tested_list_percentage	Genome_percentage	adj_pvalue
GO:0000325	plant-type vacuole	0.55	0.15	2.51416e-06
GO:0005618	cell wall	2.57	1.8	0.00113129
GO:0005773	vacuole	4.29	1.55	1.41126e-31
GO:0005777	peroxisome	1.11	0.35	2.16054e-10
GO:0008287	protein serine/threonine phosphatase complex	0.56	0.19	3.41473e-05
GO:0009505	plant-type cell wall	1.14	0.79	0.0381405
GO:0009509	chromoplast	0.07	0	0.0272617
GO:0009521	photosystem	0.83	0.1	2.6282e-17
GO:0009522	photosystem I	0.39	0.03	2.21861e-10
GO:0009523	photosystem II	0.56	0.08	7.54983e-11
GO:0009579	thylakoid	5.23	0.72	1.36587e-99
GO:0010598	NAD(P)H dehydrogenase complex (plastoquinone)	0.14	0.01	0.000308727
GO:0016469	proton-transporting two-sector ATPase complex	0.55	0.26	0.00586522
GO:0019898	extrinsic component of membrane	0.51	0.26	0.0196168
GO:0030076	light-harvesting complex	0.35	0.05	3.52916e-07
GO:0031977	thylakoid lumen	1.14	0.09	1.21626e-28
GO:0033178	proton-transporting two-sector ATPase complex, catalytic domain	0.33	0.14	0.0138549
GO:0033179	proton-transporting V-type ATPase, V0 domain	0.16	0.02	0.00267156
GO:0042579	microbody	1.11	0.35	2.16054e-10
GO:0042651	thylakoid membrane	3.94	0.31	3.40206e-99
GO:0048046	apoplast	2.66	0.86	3.43981e-23
	molecular function
GO-term ID	Term	Tested_list_percentage	Genome_percentage	adj_pvalue
GO:0000287	magnesium ion binding	1.99	0.92	4.66855e-09
GO:0000293	ferric-chelate reductase activity	0.12	0	0.000494786
GO:0003995	acyl-CoA dehydrogenase activity	0.11	0.02	0.0346735
GO:0003997	acyl-CoA oxidase activity	0.09	0.01	0.0167765
GO:0004021	L-alanine:2-oxoglutarate aminotransferase activity	0.07	0	0.0236271
GO:0004124	cysteine synthase activity	0.11	0.02	0.0203402
GO:0004177	aminopeptidase activity	0.28	0.09	0.00763794
GO:0004197	cysteine-type endopeptidase activity	0.42	0.2	0.0178147
GO:0004222	metalloendopeptidase activity	0.32	0.14	0.0330846
GO:0004364	glutathione transferase activity	0.51	0.09	2.36851e-08
GO:0004497	monooxygenase activity	1.83	0.96	1.78801e-06
GO:0004601	peroxidase activity	0.63	0.34	0.0125834
GO:0004602	glutathione peroxidase activity	0.12	0.01	0.00161938
GO:0004630	phospholipase D activity	0.12	0.02	0.0134298
GO:0004675	transmembrane receptor protein serine/threonine kinase activity	0.16	0.01	0.000342511
GO:0004707	MAP kinase activity	0.25	0.08	0.0100331
GO:0004712	protein serine/threonine/tyrosine kinase activity	0.44	0.13	0.000133828
GO:0004721	phosphoprotein phosphatase activity	1.13	0.56	8.25665e-05
GO:0004722	protein serine/threonine phosphatase activity	0.9	0.4	7.49503e-05
GO:0004806	triglyceride lipase activity	0.26	0.12	0.0496964
GO:0004871	signal transducer activity	5.24	2.7	6.63875e-18
GO:0004872	receptor activity	4.24	2.01	7.48936e-18
GO:0004888	transmembrane signaling receptor activity	2.27	0.76	7.48936e-18
GO:0005216	ion channel activity	0.81	0.36	0.000217038
GO:0005244	voltage-gated ion channel activity	0.49	0.25	0.0183721
GO:0005254	chloride channel activity	0.14	0.03	0.0201782
GO:0005261	cation channel activity	0.51	0.23	0.00415656
GO:0005275	amine transmembrane transporter activity	0.67	0.17	1.92738e-07
GO:0005351	sugar:proton symporter activity	0.65	0.27	0.000424754
GO:0005375	copper ion transmembrane transporter activity	0.21	0.06	0.00996959
GO:0005496	steroid binding	0.93	0.38	1.03324e-05
GO:0005506	iron ion binding	3.59	2.02	5.87196e-10
GO:0005507	copper ion binding	0.86	0.53	0.0167765
GO:0005509	calcium ion binding	2.55	1.06	2.95652e-14
GO:0005516	calmodulin binding	1.02	0.49	0.000133347
GO:0005528	FK506 binding	0.18	0.05	0.0167765
GO:0005529	carbohydrate binding	0.65	0.34	0.00763794
GO:0005543	phospholipid binding	0.49	0.24	0.0109768
GO:0008061	chitin binding	0.11	0.02	0.0346735
GO:0008113	peptide-methionine (S)-S-oxide reductase activity	0.16	0.02	0.00169047
GO:0008194	UDP-glycosyltransferase activity	1.43	0.58	2.12141e-08
GO:0008235	metalloexopeptidase activity	0.19	0.05	0.00771813
GO:0008237	metallopeptidase activity	0.76	0.45	0.0187025
GO:0008266	poly(U) RNA binding	0.18	0.03	0.00583627
GO:0008289	lipid binding	1.88	1.08	2.794e-05
GO:0008324	cation transmembrane transporter activity	3.57	1.83	7.68777e-13
GO:0008453	alanine-glyoxylate transaminase activity	0.09	0	0.00763794
GO:0008483	transaminase activity	0.39	0.12	0.000895666
GO:0008667	2,3-dihydro-2,3-dihydroxybenzoate dehydrogenase activity	0.44	0.22	0.0201782
GO:0008794	arsenate reductase (glutaredoxin) activity	0.18	0.02	0.000252938
GO:0008937	ferredoxin-NAD(P) reductase activity	0.09	0.01	0.0167765
GO:0009881	photoreceptor activity	0.14	0.03	0.0135975
GO:0010181	FMN binding	0.3	0.06	0.00020132
GO:0015020	glucuronosyltransferase activity	0.12	0.02	0.00771813
GO:0015035	protein disulfide oxidoreductase activity	0.55	0.09	9.8406e-09
GO:0015036	disulfide oxidoreductase activity	0.63	0.1	2.69105e-10
GO:0015038	glutathione disulfide oxidoreductase activity	0.09	0.01	0.0167765
GO:0015075	ion transmembrane transporter activity	4.38	2.18	9.23473e-17
GO:0015103	inorganic anion transmembrane transporter activity	0.42	0.16	0.00181444
GO:0015112	nitrate transmembrane transporter activity	0.12	0.02	0.0134298
GO:0015116	sulfate transmembrane transporter activity	0.14	0.02	0.00871594
GO:0015140	malate transmembrane transporter activity	0.07	0	0.0236271
GO:0015144	carbohydrate transmembrane transporter activity	0.74	0.33	0.000365384
GO:0015171	amino acid transmembrane transporter activity	0.6	0.12	1.90959e-08
GO:0015172	acidic amino acid transmembrane transporter activity	0.11	0	0.000424754
GO:0015174	basic amino acid transmembrane transporter activity	0.07	0	0.0236271
GO:0015175	neutral amino acid transmembrane transporter activity	0.14	0	0.000133347
GO:0015197	peptide transporter activity	0.21	0.05	0.00522335
GO:0015198	oligopeptide transporter activity	0.21	0.03	0.000757158
GO:0015238	drug transmembrane transporter activity	0.65	0.26	0.000291611
GO:0015293	symporter activity	1.37	0.65	3.35795e-06
GO:0015297	antiporter activity	0.99	0.49	0.000298796
GO:0015326	basic amino acid transmembrane transporter activity	0.12	0.02	0.020904
GO:0015399	primary active transmembrane transporter activity	1.55	0.73	7.17207e-07
GO:0016168	chlorophyll binding	0.4	0.02	7.74892e-11
GO:0016208	AMP binding	0.19	0.07	0.0346735
GO:0016211	ammonia ligase activity	0.12	0.02	0.00771813
GO:0016298	lipase activity	0.69	0.42	0.0347329
GO:0016614	oxidoreductase activity, acting on CH-OH group of donors	1.21	0.77	0.00763794
GO:0016616	oxidoreductase activity, acting on the CH-OH group of donors, NAD or NADP as acceptor	1.06	0.67	0.0136919
GO:0016627	oxidoreductase activity, acting on the CH-CH group of donors	0.84	0.42	0.000883704
GO:0016628	oxidoreductase activity, acting on the CH-CH group of donors, NAD or NADP as acceptor	0.55	0.28	0.0115082
GO:0016656	monodehydroascorbate reductase (NADH) activity	0.07	0	0.0236271
GO:0016667	oxidoreductase activity, acting on a sulfur group of donors	1.06	0.18	1.58998e-16
GO:0016671	oxidoreductase activity, acting on a sulfur group of donors, disulfide as acceptor	0.3	0.05	7.56785e-05
GO:0016701	oxidoreductase activity, acting on single donors with incorporation of molecular oxygen	0.53	0.17	6.84456e-05
GO:0016702	oxidoreductase activity, acting on single donors with incorporation of molecular oxygen, incorporation of two atoms of oxygen	0.42	0.16	0.00181444
GO:0016705	oxidoreductase activity, acting on paired donors, with incorporation or reduction of molecular oxygen	1.13	0.63	0.00119993
GO:0016709	oxidoreductase activity, acting on paired donors, with incorporation or reduction of molecular oxygen, NAD(P)H as one donor, and incorporation of one atom of oxygen	0.42	0.21	0.0278924
GO:0016746	transferase activity, transferring acyl groups	1.35	0.9	0.0109768
GO:0016747	transferase activity, transferring acyl groups other than amino-acyl groups	1.23	0.82	0.0155997
GO:0016757	transferase activity, transferring glycosyl groups	2.38	1.42	9.62375e-06
GO:0016758	transferase activity, transferring hexosyl groups	1.99	1.1	4.21597e-06
GO:0016765	transferase activity, transferring alkyl or aryl (other than methyl) groups	0.81	0.33	5.92486e-05
GO:0016769	transferase activity, transferring nitrogenous groups	0.48	0.17	0.000506212
GO:0016783	sulfurtransferase activity	0.12	0.02	0.0134298
GO:0016791	phosphatase activity	1.72	0.86	8.67568e-07
GO:0016810	hydrolase activity, acting on carbon-nitrogen (but not peptide) bonds	0.62	0.33	0.0131052
GO:0016813	hydrolase activity, acting on carbon-nitrogen (but not peptide) bonds, in linear amidines	0.09	0.01	0.0167765
GO:0016820	hydrolase activity, acting on acid anhydrides, catalyzing transmembrane movement of substances	1.37	0.59	2.3902e-07
GO:0016829	lyase activity	2.04	1.08	7.1901e-07
GO:0016830	carbon-carbon lyase activity	0.6	0.35	0.0372053
GO:0016836	hydro-lyase activity	0.44	0.19	0.00738782
GO:0016844	strictosidine synthase activity	0.16	0.02	0.00322348
GO:0016846	carbon-sulfur lyase activity	0.35	0.12	0.00219532
GO:0016847	1-aminocyclopropane-1-carboxylate synthase activity	0.23	0.07	0.0115082
GO:0016853	isomerase activity	1.32	0.76	0.000613234
GO:0016887	ATPase activity	2.22	1.58	0.00583627
GO:0016987	sigma factor activity	0.09	0	0.00763794
GO:0017040	ceramidase activity	0.09	0.01	0.0167765
GO:0019144	ADP-sugar diphosphatase activity	0.11	0.01	0.00583627
GO:0019825	oxygen binding	1.18	0.65	0.000494786
GO:0020037	heme binding	1.79	1.12	0.000506212
GO:0030145	manganese ion binding	1.72	0.61	7.68777e-13
GO:0030151	molybdenum ion binding	0.12	0.02	0.00771813
GO:0030170	pyridoxal phosphate binding	0.79	0.32	5.9151e-05
GO:0030246	carbohydrate binding	1.25	0.61	2.39222e-05
GO:0030551	cyclic nucleotide binding	0.23	0.07	0.0115082
GO:0030611	arsenate reductase activity	0.19	0.02	7.54969e-05
GO:0031072	heat shock protein binding	0.79	0.43	0.00497692
GO:0035091	phosphatidylinositol binding	0.37	0.16	0.0163251
GO:0035251	UDP-glucosyltransferase activity	0.77	0.29	1.72897e-05
GO:0042277	peptide binding	0.35	0.15	0.0134298
GO:0042285	xylosyltransferase activity	0.11	0.02	0.0203402
GO:0042578	phosphoric ester hydrolase activity	2.04	1.04	1.49017e-07
GO:0043295	glutathione binding	0.14	0.01	0.000432719
GO:0045551	cinnamyl-alcohol dehydrogenase activity	0.12	0.03	0.0498124
GO:0046527	glucosyltransferase activity	0.88	0.35	1.12967e-05
GO:0046870	cadmium ion binding	0.09	0.01	0.0336194
GO:0046873	metal ion transmembrane transporter activity	1.13	0.58	0.000177782
GO:0046906	tetrapyrrole binding	2.2	1.15	1.28488e-07
GO:0047631	ADP-ribose diphosphatase activity	0.09	0	0.00763794
GO:0048037	cofactor binding	3.48	1.52	1.37751e-17
GO:0050403	trans-zeatin O-beta-D-glucosyltransferase activity	0.09	0	0.00181444
GO:0050502	cis-zeatin O-beta-D-glucosyltransferase activity	0.09	0	0.00181444
GO:0050660	flavin adenine dinucleotide binding	1.21	0.44	7.65361e-09
GO:0050662	coenzyme binding	2.55	1.08	6.45153e-14
GO:0051119	sugar transmembrane transporter activity	0.7	0.3	0.000300168
GO:0051213	dioxygenase activity	0.42	0.16	0.00303166
GO:0051536	iron-sulfur cluster binding	0.67	0.22	1.03324e-05
GO:0051537	2 iron, 2 sulfur cluster binding	0.28	0.07	0.00105901
GO:0051539	4 iron, 4 sulfur cluster binding	0.23	0.09	0.0495609
GO:0070290	N-acylphosphatidylethanolamine-specific phospholipase D activity	0.12	0.02	0.00771813
GO:0080043	quercetin 3-O-glucosyltransferase activity	0.18	0.05	0.0226811
GO:0080044	quercetin 7-O-glucosyltransferase activity	0.16	0.03	0.00876055

## Sheet: L<t0
	biological process
GO-term ID	Term	Tested_list_percentage	Genome_percentage	adj_pvalue
GO:0000087	mitotic M phase	0.47	0.07	2.87898e-07
GO:0000226	microtubule cytoskeleton organization	0.5	0.07	4.71571e-08
GO:0000278	mitotic cell cycle	0.88	0.1	2.01888e-15
GO:0000280	nuclear division	0.5	0.08	2.36286e-07
GO:0000724	double-strand break repair via homologous recombination	0.12	0.02	0.0323686
GO:0000902	cell morphogenesis	1.28	0.59	2.75503e-05
GO:0000904	cell morphogenesis involved in differentiation	0.28	0.11	0.0326813
GO:0000910	cytokinesis	0.52	0.07	1.19152e-08
GO:0000911	cytokinesis by cell plate formation	0.21	0.03	0.000940827
GO:0000914	phragmoplast assembly	0.12	0	0.000369526
GO:0001510	RNA methylation	0.21	0.03	0.000540138
GO:0001708	cell fate specification	0.31	0.04	5.45091e-05
GO:0006259	DNA metabolic process	4.6	2.19	6.30601e-16
GO:0006260	DNA replication	1.95	0.81	4.58792e-09
GO:0006261	DNA-dependent DNA replication	0.71	0.09	1.05404e-11
GO:0006265	DNA topological change	0.26	0.07	0.00960868
GO:0006268	DNA unwinding involved in DNA replication	0.19	0.01	0.00029234
GO:0006270	DNA replication initiation	0.24	0.01	1.43131e-05
GO:0006275	regulation of DNA replication	0.21	0.02	0.000292876
GO:0006281	DNA repair	2.02	0.44	1.08828e-21
GO:0006298	mismatch repair	0.19	0.03	0.00196391
GO:0006302	double-strand break repair	0.28	0.04	0.000115844
GO:0006304	DNA modification	0.4	0.08	4.53548e-05
GO:0006306	DNA methylation	0.38	0.08	0.000134088
GO:0006310	DNA recombination	0.78	0.15	8.80164e-10
GO:0006325	chromatin organization	2.75	0.55	1.59899e-31
GO:0006333	chromatin assembly or disassembly	1.35	0.31	6.3607e-14
GO:0006334	nucleosome assembly	1.12	0.19	6.78367e-15
GO:0006338	chromatin remodeling	0.19	0.03	0.00531113
GO:0006349	regulation of gene expression by genetic imprinting	0.14	0.02	0.00901875
GO:0006364	rRNA processing	0.9	0.32	1.06117e-05
GO:0006379	mRNA cleavage	0.12	0.01	0.0192336
GO:0006396	RNA processing	2.82	1.2	1.78958e-12
GO:0006397	mRNA processing	0.71	0.38	0.0175251
GO:0006457	protein folding	1.47	0.78	0.000192094
GO:0006461	protein complex assembly	1.38	0.86	0.00871666
GO:0006626	protein targeting to mitochondrion	0.21	0.03	0.00157548
GO:0006730	one-carbon metabolic process	1.02	0.32	1.69546e-07
GO:0006913	nucleocytoplasmic transport	0.74	0.38	0.00937414
GO:0006949	syncytium formation	0.17	0.01	0.000535062
GO:0006974	cellular response to DNA damage stimulus	2.09	0.45	2.05942e-22
GO:0007005	mitochondrion organization	0.33	0.07	0.000249526
GO:0007010	cytoskeleton organization	1.12	0.29	2.87927e-10
GO:0007017	microtubule-based process	1.64	0.22	2.147e-25
GO:0007018	microtubule-based movement	1.19	0.11	5.63922e-22
GO:0007049	cell cycle	3.2	0.48	1.20991e-45
GO:0007050	cell cycle arrest	0.12	0.01	0.0101289
GO:0007059	chromosome segregation	0.28	0.04	0.000189571
GO:0007067	mitotic nuclear division	0.47	0.07	1.69546e-07
GO:0007126	meiotic nuclear division	0.66	0.06	5.7229e-13
GO:0007140	male meiosis	0.09	0.01	0.0419317
GO:0007166	cell surface receptor signaling pathway	1.78	1.27	0.0321594
GO:0007169	transmembrane receptor protein tyrosine kinase signaling pathway	0.9	0.34	2.38089e-05
GO:0007276	gamete generation	0.24	0.05	0.0040673
GO:0007346	regulation of mitotic cell cycle	0.19	0.03	0.00335824
GO:0007389	pattern specification process	1.35	0.21	4.54971e-19
GO:0008283	cell proliferation	0.4	0.13	0.00265402
GO:0008356	asymmetric cell division	0.17	0	6.04552e-05
GO:0008361	regulation of cell size	1.3	0.67	0.000248247
GO:0008380	RNA splicing	0.62	0.29	0.00703712
GO:0008544	epidermis development	0.76	0.29	0.000165646
GO:0009294	DNA mediated transformation	0.28	0.05	0.000441937
GO:0009451	RNA modification	0.66	0.37	0.0313812
GO:0009553	embryo sac development	0.59	0.19	0.000148836
GO:0009555	pollen development	0.62	0.33	0.0266752
GO:0009561	megagametogenesis	0.31	0.12	0.0273198
GO:0009606	tropism	0.36	0.11	0.00448412
GO:0009616	virus induced gene silencing	0.12	0.01	0.00468181
GO:0009629	response to gravity	0.31	0.1	0.00774676
GO:0009630	gravitropism	0.31	0.08	0.00345485
GO:0009640	photomorphogenesis	0.33	0.14	0.0447841
GO:0009653	anatomical structure morphogenesis	3.44	1.24	4.3981e-20
GO:0009733	response to auxin	1.49	1.01	0.0208239
GO:0009734	auxin-activated signaling pathway	0.71	0.32	0.00182495
GO:0009739	response to gibberellin	0.62	0.35	0.0447841
GO:0009740	gibberellic acid mediated signaling pathway	0.33	0.08	0.000687872
GO:0009790	embryo development	2.47	1.09	3.39439e-10
GO:0009791	post-embryonic development	5.88	2.41	1.4191e-27
GO:0009793	embryo development ending in seed dormancy	2.28	0.98	6.78805e-10
GO:0009799	specification of symmetry	0.12	0	0.000369526
GO:0009825	multidimensional cell growth	0.33	0.12	0.01238
GO:0009826	unidimensional cell growth	0.93	0.44	0.000782613
GO:0009887	organ morphogenesis	1.52	0.38	3.99532e-14
GO:0009892	negative regulation of metabolic process	1.45	0.48	8.02264e-10
GO:0009908	flower development	2.47	0.68	1.12223e-20
GO:0009909	regulation of flower development	0.71	0.22	1.43131e-05
GO:0009913	epidermal cell differentiation	0.76	0.28	0.000115844
GO:0009933	meristem structural organization	0.45	0.08	4.56428e-06
GO:0009934	regulation of meristem structural organization	0.21	0.03	0.00157548
GO:0009943	adaxial/abaxial axis specification	0.36	0.01	3.93816e-09
GO:0009944	polarity specification of adaxial/abaxial axis	0.33	0.01	1.24987e-09
GO:0009954	proximal/distal pattern formation	0.09	0	0.00898686
GO:0009955	adaxial/abaxial pattern specification	0.45	0.02	1.74948e-11
GO:0009956	radial pattern formation	0.09	0.01	0.0213679
GO:0009958	positive gravitropism	0.17	0.02	0.00421347
GO:0009965	leaf morphogenesis	0.78	0.24	4.59025e-06
GO:0010015	root morphogenesis	0.62	0.22	0.000354343
GO:0010016	shoot system morphogenesis	1.07	0.35	1.29561e-07
GO:0010051	xylem and phloem pattern formation	0.47	0.07	2.87898e-07
GO:0010073	meristem maintenance	0.59	0.08	4.1491e-09
GO:0010074	maintenance of meristem identity	0.28	0.03	9.0378e-06
GO:0010075	regulation of meristem growth	0.21	0.04	0.00253274
GO:0010084	specification of organ axis polarity	0.33	0.01	5.50858e-09
GO:0010087	phloem or xylem histogenesis	0.26	0.07	0.00960868
GO:0010103	stomatal complex morphogenesis	0.21	0.02	0.000292876
GO:0010154	fruit development	2.68	1.19	7.36563e-11
GO:0010212	response to ionizing radiation	0.24	0.01	4.92719e-06
GO:0010229	inflorescence development	0.17	0.01	0.000535062
GO:0010252	auxin homeostasis	0.19	0.03	0.00196391
GO:0010305	leaf vascular tissue pattern formation	0.19	0.03	0.00335824
GO:0010332	response to gamma radiation	0.17	0.01	0.000213755
GO:0010374	stomatal complex development	0.26	0.05	0.000898012
GO:0010476	gibberellin mediated signaling pathway	0.33	0.08	0.000687872
GO:0010588	cotyledon vascular tissue pattern formation	0.14	0.02	0.00901875
GO:0016049	cell growth	1.23	0.65	0.000687872
GO:0016071	mRNA metabolic process	0.81	0.44	0.0113984
GO:0016125	sterol metabolic process	0.26	0.09	0.0261089
GO:0016126	sterol biosynthetic process	0.26	0.08	0.01238
GO:0016441	posttranscriptional gene silencing	0.69	0.25	0.000223258
GO:0016458	gene silencing	0.97	0.29	8.01279e-08
GO:0016481	negative regulation of transcription, DNA-templated	0.45	0.14	0.000984764
GO:0016568	chromatin modification	1.57	0.25	2.69157e-21
GO:0016570	histone modification	0.59	0.12	2.87933e-07
GO:0019827	stem cell maintenance	0.33	0.04	4.46756e-06
GO:0022621	shoot system development	2.18	0.68	9.25567e-16
GO:0030029	actin filament-based process	0.57	0.22	0.00151893
GO:0030036	actin cytoskeleton organization	0.43	0.17	0.0090946
GO:0030154	cell differentiation	2.25	0.8	1.12426e-13
GO:0030261	chromosome condensation	0.09	0.01	0.0213679
GO:0031047	gene silencing by RNA	0.74	0.25	4.01175e-05
GO:0031507	heterochromatin assembly	0.09	0	0.00898686
GO:0032259	methylation	0.97	0.22	2.38626e-10
GO:0032504	multicellular organism reproduction	0.43	0.14	0.00146377
GO:0032508	DNA duplex unwinding	0.21	0.02	0.000292876
GO:0033044	regulation of chromosome organization	0.17	0	6.04552e-05
GO:0035266	meristem growth	0.21	0.04	0.00390323
GO:0040008	regulation of growth	0.36	0.1	0.00160634
GO:0040029	regulation of gene expression, epigenetic	1.26	0.39	3.10183e-09
GO:0042023	DNA endoreduplication	0.28	0.05	0.000292876
GO:0042254	ribosome biogenesis	2.94	0.44	6.17181e-42
GO:0042547	cell wall modification involved in multidimensional cell growth	0.24	0.07	0.0140332
GO:0045165	cell fate commitment	0.31	0.07	0.000687872
GO:0045787	positive regulation of cell cycle	0.12	0	0.000369526
GO:0045814	negative regulation of gene expression, epigenetic	0.28	0.03	3.67094e-05
GO:0048229	gametophyte development	1.12	0.48	2.66455e-05
GO:0048316	seed development	2.54	1.15	4.6606e-10
GO:0048364	root development	1.21	0.49	3.3895e-06
GO:0048366	leaf development	1.4	0.42	7.36563e-11
GO:0048367	shoot system development	2.16	0.67	1.30809e-15
GO:0048437	floral organ development	0.97	0.28	6.15556e-08
GO:0048438	floral whorl development	0.88	0.24	8.86018e-08
GO:0048439	flower morphogenesis	0.12	0	0.000369526
GO:0048440	carpel development	0.4	0.12	0.000984764
GO:0048444	floral organ morphogenesis	0.24	0.06	0.0105844
GO:0048467	gynoecium development	0.5	0.13	4.53548e-05
GO:0048507	meristem development	1.02	0.25	6.26322e-10
GO:0048509	regulation of meristem development	0.45	0.11	0.000128686
GO:0048513	organ development	4.6	1.57	4.77975e-29
GO:0048569	post-embryonic organ development	1	0.28	2.40955e-08
GO:0048589	developmental growth	1.33	0.54	1.08605e-06
GO:0048598	embryonic morphogenesis	0.09	0.01	0.0419317
GO:0048638	regulation of developmental growth	0.28	0.06	0.000672608
GO:0048645	organ formation	0.36	0.06	5.45091e-05
GO:0048825	cotyledon development	0.38	0.04	4.92549e-07
GO:0048827	phyllome development	1.71	0.44	2.01888e-15
GO:0048864	stem cell development	0.36	0.04	1.04162e-06
GO:0051258	protein polymerization	0.43	0.11	0.000182644
GO:0051276	chromosome organization	3.25	0.62	7.71332e-39
GO:0051301	cell division	2.06	0.34	1.659e-27
GO:0051302	regulation of cell division	0.17	0.03	0.0109618
GO:0051726	regulation of cell cycle	1.33	0.19	1.09665e-19
GO:0065002	intracellular protein transmembrane transport	0.17	0.04	0.0337632
	cellular component
GO-term ID	Term	Tested_list_percentage	Genome_percentage	adj_pvalue
GO:0000151	ubiquitin ligase complex	1.38	0.72	0.000188728
GO:0000793	condensed chromosome	0.19	0.02	0.000937269
GO:0005618	cell wall	3.44	1.71	2.35393e-11
GO:0005694	chromosome	2.82	0.65	1.4109e-29
GO:0005732	small nucleolar ribonucleoprotein complex	0.71	0.26	9.46361e-05
GO:0005829	cytosol	6.69	1.7	4.73352e-63
GO:0005834	heterotrimeric G-protein complex	0.43	0.18	0.01494
GO:0005840	ribosome	6.48	1.02	1.26312e-92
GO:0005856	cytoskeleton	2.63	0.79	1.21881e-20
GO:0009505	plant-type cell wall	1.23	0.8	0.0212524
GO:0009506	plasmodesma	0.17	0.03	0.0112556
GO:0009524	phragmoplast	0.4	0.11	0.000483157
GO:0015630	microtubule cytoskeleton	2.04	0.3	1.38894e-30
GO:0022626	cytosolic ribosome	5.22	0.35	4.90466e-116
GO:0030529	ribonucleoprotein complex	7.64	1.58	2.0487e-88
GO:0030880	RNA polymerase complex	0.31	0.05	6.845e-05
GO:0031225	anchored component of membrane	1.47	0.7	1.27433e-05
GO:0031226	intrinsic component of plasma membrane	0.88	0.33	2.12664e-05
GO:0031461	cullin-RING ubiquitin ligase complex	1.02	0.44	5.82471e-05
GO:0032040	small-subunit processome	0.09	0.01	0.0421505
GO:0044445	cytosolic part	4.93	0.26	1.33502e-118
GO:0046658	anchored component of plasma membrane	0.78	0.12	1.56192e-11
GO:0080008	Cul4-RING E3 ubiquitin ligase complex	0.97	0.3	1.13132e-07
	molecular function
GO-term ID	Term	Tested_list_percentage	Genome_percentage	adj_pvalue
GO:0000175	3'-5'-exoribonuclease activity	0.17	0.02	0.0117506
GO:0003678	DNA helicase activity	0.33	0.04	1.23662e-05
GO:0003684	damaged DNA binding	0.43	0.08	2.53762e-05
GO:0003690	double-stranded DNA binding	0.38	0.07	0.000154652
GO:0003697	single-stranded DNA binding	0.26	0.04	0.000608119
GO:0003713	transcription coactivator activity	0.26	0.06	0.0113325
GO:0003725	double-stranded RNA binding	0.21	0.05	0.0295093
GO:0003735	structural constituent of ribosome	6.19	0.75	2.08177e-103
GO:0003774	motor activity	1.16	0.22	2.82741e-13
GO:0003777	microtubule motor activity	0.93	0.11	1.97772e-14
GO:0003887	DNA-directed DNA polymerase activity	0.4	0.04	9.68969e-07
GO:0003899	DNA-directed RNA polymerase activity	0.66	0.15	1.26841e-06
GO:0003916	DNA topoisomerase activity	0.26	0.07	0.0138738
GO:0003924	GTPase activity	0.93	0.45	0.00284763
GO:0003968	RNA-directed RNA polymerase activity	0.12	0.01	0.0265236
GO:0004221	ubiquitin thiolesterase activity	0.45	0.17	0.0138738
GO:0004386	helicase activity	1.66	0.41	9.29145e-15
GO:0004407	histone deacetylase activity	0.19	0.04	0.0207772
GO:0004518	nuclease activity	1.45	0.63	6.21074e-06
GO:0004527	exonuclease activity	0.71	0.2	6.68341e-06
GO:0004693	cyclin-dependent protein serine/threonine kinase activity	0.36	0.1	0.00337093
GO:0005200	structural constituent of cytoskeleton	0.33	0.07	0.00145086
GO:0008017	microtubule binding	0.4	0.04	9.68969e-07
GO:0008092	cytoskeletal protein binding	0.88	0.33	8.59533e-05
GO:0008168	methyltransferase activity	1.66	0.83	3.81691e-05
GO:0008170	N-methyltransferase activity	0.5	0.12	8.59533e-05
GO:0008276	protein methyltransferase activity	0.5	0.1	7.15306e-06
GO:0008327	methyl-CpG binding	0.21	0.03	0.00148821
GO:0008408	3'-5' exonuclease activity	0.38	0.06	1.6318e-05
GO:0008757	S-adenosylmethionine-dependent methyltransferase activity	0.85	0.33	0.000167909
GO:0010279	indole-3-acetic acid amido synthetase activity	0.12	0	0.00449836
GO:0015450	P-P-bond-hydrolysis-driven protein transmembrane transporter activity	0.45	0.2	0.0425595
GO:0015631	tubulin binding	0.52	0.06	8.98372e-09
GO:0016274	protein-arginine N-methyltransferase activity	0.12	0	0.00449836
GO:0016538	cyclin-dependent protein serine/threonine kinase regulator activity	0.55	0.04	1.93112e-10
GO:0016563	transcription activator activity	0.76	0.41	0.0379833
GO:0016887	ATPase activity	2.78	1.53	2.22608e-06
GO:0018024	histone-lysine N-methyltransferase activity	0.36	0.07	0.000313618
GO:0019843	rRNA binding	0.83	0.18	1.10462e-08
GO:0019887	protein kinase regulator activity	0.55	0.07	4.65351e-08
GO:0030983	mismatched DNA binding	0.19	0.02	0.00157303
GO:0032549	ribonucleoside binding	0.12	0.01	0.0129118
GO:0042054	histone methyltransferase activity	0.45	0.07	3.57431e-06
GO:0042393	histone binding	0.21	0.03	0.00148821
GO:0042802	identical protein binding	0.93	0.5	0.0138738
GO:0042973	glucan endo-1,3-beta-D-glucosidase activity	0.24	0.02	8.68319e-05
GO:0043565	sequence-specific DNA binding	2.8	1.46	1.92741e-07
GO:0046983	protein dimerization activity	1.3	0.83	0.0374746
GO:0051082	unfolded protein binding	0.76	0.38	0.0138738

## Sheet: L>I
	biological process
GO-term ID	Term	Tested_list_percentage	Genome_percentage	adj_pvalue
GO:0000103	sulfate assimilation	0.17	0.02	0.00198865
GO:0000160	two-component signal transduction system (phosphorelay)	1.62	0.53	8.3157e-12
GO:0000165	MAPK cascade	0.13	0	0.000540212
GO:0000273	lipoic acid metabolic process	0.09	0.01	0.0256092
GO:0001539	ciliary or flagellar motility	0.48	0.13	9.23954e-05
GO:0005978	glycogen biosynthetic process	0.15	0.03	0.0252472
GO:0005982	starch metabolic process	0.3	0.08	0.00173594
GO:0005985	sucrose metabolic process	0.15	0.04	0.032685
GO:0006032	chitin catabolic process	0.19	0.06	0.0397949
GO:0006073	cellular glucan metabolic process	0.71	0.38	0.0100001
GO:0006081	cellular aldehyde metabolic process	0.24	0.06	0.00775527
GO:0006109	regulation of carbohydrate metabolic process	0.11	0.02	0.0390395
GO:0006470	protein dephosphorylation	0.6	0.18	1.55117e-05
GO:0006519	cellular amino acid metabolic process	3.33	1.87	2.60E-008
GO:0006520	cellular amino acid metabolic process	2.05	1.2	7.32455e-05
GO:0006534	cysteine metabolic process	0.26	0.04	0.000279942
GO:0006555	methionine metabolic process	0.32	0.12	0.0152533
GO:0006563	L-serine metabolic process	0.22	0.07	0.0247755
GO:0006568	tryptophan metabolic process	0.26	0.04	0.000279942
GO:0006595	polyamine metabolic process	0.15	0.04	0.032685
GO:0006629	lipid metabolic process	3.69	2.5	5.53539e-05
GO:0006721	terpenoid metabolic process	0.6	0.28	0.00403472
GO:0006725	cellular aromatic compound metabolic process	2.77	1.22	2.00492e-12
GO:0006783	heme biosynthetic process	0.13	0.01	0.0074176
GO:0006790	sulfur compound metabolic process	1.84	0.34	1.63079e-24
GO:0006811	ion transport	3.26	1.89	1.54374e-07
GO:0006812	cation transport	2.46	1.59	0.000355408
GO:0006813	potassium ion transport	0.65	0.36	0.0256092
GO:0006814	sodium ion transport	0.28	0.11	0.0271192
GO:0006816	calcium ion transport	0.24	0.07	0.0137695
GO:0006820	anion transport	0.56	0.27	0.00836422
GO:0006821	chloride transport	0.17	0.04	0.0131626
GO:0006857	oligopeptide transport	0.58	0.16	1.18469e-05
GO:0006865	amino acid transport	0.5	0.18	0.00135332
GO:0006873	cellular ion homeostasis	0.45	0.23	0.0346807
GO:0006875	cellular metal ion homeostasis	0.3	0.11	0.0138508
GO:0006904	vesicle docking involved in exocytosis	0.24	0.09	0.040394
GO:0006914	autophagy	0.19	0.05	0.0139541
GO:0006915	apoptotic process	2.07	0.32	3.02216e-31
GO:0006952	defense response	7.13	1.88	5.12036e-68
GO:0006955	immune response	3.46	0.67	7.46891e-44
GO:0006970	response to osmotic stress	2.64	1.01	3.62486e-15
GO:0006972	hyperosmotic response	0.32	0.13	0.0183708
GO:0006979	response to oxidative stress	1.92	0.73	2.33779e-11
GO:0006986	response to unfolded protein	0.09	0.01	0.0459741
GO:0007166	cell surface receptor signaling pathway	1.9	1.24	0.00240571
GO:0007186	G-protein coupled receptor signaling pathway	1.38	0.79	0.000996219
GO:0007242	intracellular signaling cascade	5.01	2.84	4.55184e-12
GO:0007243	intracellular protein kinase cascade	0.15	0.01	0.00198865
GO:0007568	aging	0.6	0.17	8.96464e-06
GO:0007623	circadian rhythm	0.35	0.11	0.00371136
GO:0008037	cell recognition	0.39	0.1	0.00030567
GO:0008219	cell death	3.11	0.48	6.22342e-47
GO:0008299	isoprenoid biosynthetic process	0.63	0.33	0.0171203
GO:0008615	positive regulation of cell death	0.09	0.01	0.0459741
GO:0008643	carbohydrate transport	0.56	0.25	0.00538633
GO:0008652	cellular amino acid biosynthetic process	1.1	0.5	6.05878e-05
GO:0009069	serine family amino acid metabolic process	0.35	0.13	0.0112629
GO:0009072	aromatic amino acid family metabolic process	0.52	0.14	2.86013e-05
GO:0009073	aromatic amino acid family biosynthetic process	0.37	0.11	0.00131165
GO:0009105	lipoate biosynthetic process	0.09	0.01	0.0256092
GO:0009239	enterobactin biosynthetic process	0.45	0.22	0.0272919
GO:0009266	response to temperature stimulus	2.4	1.16	6.32666e-09
GO:0009267	cellular response to starvation	0.43	0.15	0.00141676
GO:0009269	response to desiccation	0.24	0.03	8.62241e-05
GO:0009308	amine metabolic process	2.7	1.53	8.72266e-07
GO:0009311	oligosaccharide metabolic process	0.41	0.12	0.000544396
GO:0009312	oligosaccharide biosynthetic process	0.32	0.09	0.00174222
GO:0009314	response to radiation	2.74	1.3	1.36245e-10
GO:0009407	toxin catabolic process	0.52	0.08	5.42135e-08
GO:0009408	response to heat	0.71	0.33	0.00160413
GO:0009409	response to cold	1.75	0.83	7.3328e-07
GO:0009414	response to water deprivation	1.69	0.34	5.24381e-21
GO:0009415	response to water	1.77	0.35	3.59278e-22
GO:0009416	response to light stimulus	2.74	1.25	1.9662e-11
GO:0009605	response to external stimulus	2.83	0.92	6.87514e-21
GO:0009607	response to biotic stimulus	5.01	1.2	2.02629e-52
GO:0009611	response to wounding	1.45	0.39	1.15301e-13
GO:0009617	response to bacterium	2.44	0.47	3.33214e-31
GO:0009620	response to fungus	1.58	0.19	1.60058e-27
GO:0009624	response to nematode	0.43	0.13	0.000540212
GO:0009625	response to insect	0.17	0.02	0.00198865
GO:0009626	plant-type hypersensitive response	0.65	0.06	1.26684e-13
GO:0009627	systemic acquired resistance	0.35	0.06	1.94953e-05
GO:0009631	cold acclimation	0.24	0.03	0.00030567
GO:0009636	response to toxin	0.84	0.16	6.06369e-11
GO:0009637	response to blue light	0.39	0.13	0.00198865
GO:0009638	phototropism	0.15	0.02	0.00378065
GO:0009639	response to red or far red light	0.91	0.47	0.00224211
GO:0009642	response to light intensity	0.58	0.16	1.55117e-05
GO:0009644	response to high light intensity	0.35	0.1	0.00173594
GO:0009651	response to salt stress	2.44	0.93	4.518e-14
GO:0009657	plastid organization	0.65	0.22	5.2641e-05
GO:0009658	chloroplast organization	0.41	0.13	0.00119625
GO:0009684	indoleacetic acid biosynthetic process	0.13	0.01	0.0074176
GO:0009696	salicylic acid metabolic process	0.15	0.03	0.0168289
GO:0009697	salicylic acid biosynthetic process	0.09	0.01	0.0256092
GO:0009698	phenylpropanoid metabolic process	0.86	0.5	0.0146593
GO:0009699	phenylpropanoid biosynthetic process	0.67	0.39	0.0290164
GO:0009700	indole phytoalexin biosynthetic process	0.15	0.01	0.000374107
GO:0009704	de-etiolation	0.11	0	0.0024183
GO:0009723	response to ethylene stimulus	1.86	0.62	3.97235e-13
GO:0009725	response to hormone stimulus	5.66	2.43	1.81222e-26
GO:0009733	response to auxin stimulus	1.53	0.99	0.00587905
GO:0009735	response to cytokinin stimulus	0.54	0.21	0.00110805
GO:0009736	cytokinin mediated signaling pathway	0.3	0.13	0.0397949
GO:0009737	response to abscisic acid stimulus	2.16	0.71	1.37029e-15
GO:0009738	abscisic acid mediated signaling pathway	0.67	0.23	4.91745e-05
GO:0009739	response to gibberellin stimulus	0.71	0.33	0.00160413
GO:0009743	response to carbohydrate stimulus	2.16	0.36	3.02216e-31
GO:0009751	response to salicylic acid stimulus	1.3	0.31	1.45947e-13
GO:0009753	response to jasmonic acid stimulus	1.25	0.35	2.59297e-11
GO:0009755	hormone-mediated signaling pathway	2.81	1.19	1.68098e-13
GO:0009765	photosynthesis, light harvesting	0.37	0.06	6.11543e-06
GO:0009767	photosynthetic electron transport chain	0.3	0.09	0.00405825
GO:0009773	photosynthetic electron transport in photosystem I	0.19	0.02	0.00030567
GO:0009813	flavonoid biosynthetic process	0.39	0.17	0.0179426
GO:0009814	defense response, incompatible interaction	1.21	0.14	8.65973e-22
GO:0009816	defense response to bacterium, incompatible interaction	0.37	0.03	1.01783e-07
GO:0009817	defense response to fungus, incompatible interaction	0.39	0.03	3.50465e-09
GO:0009821	alkaloid biosynthetic process	0.13	0.03	0.0304705
GO:0009835	fruit ripening	0.13	0.02	0.021419
GO:0009850	auxin metabolic process	0.28	0.09	0.00959153
GO:0009851	auxin biosynthetic process	0.24	0.04	0.000527058
GO:0009862	systemic acquired resistance, salicylic acid mediated signaling pathway	0.15	0.02	0.00378065
GO:0009863	salicylic acid mediated signaling pathway	0.3	0.05	7.31094e-05
GO:0009867	jasmonic acid mediated signaling pathway	0.3	0.07	0.000633031
GO:0009873	ethylene mediated signaling pathway	1.27	0.41	1.09353e-09
GO:0009875	pollen-pistil interaction	0.35	0.09	0.000996219
GO:0009902	chloroplast relocation	0.13	0	0.000540212
GO:0010017	red or far-red light signaling pathway	0.37	0.17	0.0357785
GO:0010027	thylakoid membrane organization	0.15	0.04	0.032685
GO:0010038	response to metal ion	2.07	1.11	3.45223e-06
GO:0010104	regulation of ethylene mediated signaling pathway	0.13	0.03	0.0304705
GO:0010114	response to red light	0.48	0.12	3.71845e-05
GO:0010118	stomatal movement	0.43	0.09	1.42857e-05
GO:0010119	regulation of stomatal movement	0.26	0.05	0.000678657
GO:0010120	camalexin biosynthetic process	0.15	0	0.000106376
GO:0010149	senescence	0.28	0.07	0.00167598
GO:0010150	leaf senescence	0.22	0.05	0.00756906
GO:0010167	response to nitrate	0.13	0.03	0.0304705
GO:0010188	response to microbial phytotoxin	0.11	0	0.0024183
GO:0010193	response to ozone	0.24	0.05	0.00275798
GO:0010200	response to chitin	1.84	0.16	1.47736e-38
GO:0010218	response to far red light	0.28	0.11	0.0271192
GO:0010260	organ senescence	0.24	0.05	0.00275798
GO:0010304	PSII associated light-harvesting complex II catabolic process	0.09	0.01	0.0256092
GO:0010380	regulation of chlorophyll biosynthetic process	0.11	0.01	0.025269
GO:0010942	pyridoxine biosynthetic process	0.09	0.01	0.0459741
GO:0012501	programmed cell death	2.79	0.42	5.19927e-43
GO:0015031	protein transport	2.25	1.73	0.0428981
GO:0015706	nitrate transport	0.11	0.01	0.025269
GO:0015804	neutral amino acid transport	0.09	0.01	0.0256092
GO:0015833	peptide transport	0.58	0.18	3.7334e-05
GO:0015914	phospholipid transport	0.15	0.03	0.0111285
GO:0015979	photosynthesis	1.47	0.48	5.79634e-11
GO:0015994	chlorophyll metabolic process	0.39	0.15	0.00904475
GO:0015996	chlorophyll catabolic process	0.17	0.01	8.01638e-05
GO:0016051	carbohydrate biosynthetic process	1.66	0.77	7.18831e-07
GO:0016114	terpenoid biosynthetic process	0.48	0.22	0.0165668
GO:0016116	carotenoid metabolic process	0.28	0.07	0.00167598
GO:0016192	vesicle-mediated transport	1.38	0.95	0.025269
GO:0016226	iron-sulfur cluster assembly	0.24	0.04	0.000527058
GO:0016311	dephosphorylation	0.69	0.22	1.07324e-05
GO:0016559	peroxisome fission	0.11	0.01	0.025269
GO:0016998	cell wall macromolecule catabolic process	0.32	0.07	0.000348436
GO:0018298	protein-chromophore linkage	0.24	0.06	0.00565853
GO:0019252	starch biosynthetic process	0.17	0.04	0.0131626
GO:0019684	photosynthesis, light reaction	0.86	0.23	1.77879e-08
GO:0019725	cellular homeostasis	1.73	0.56	9.99156e-13
GO:0019748	secondary metabolic process	3.07	1.11	3.1543e-19
GO:0019752	carboxylic acid metabolic process	3.91	2.39	1.54374e-07
GO:0019760	glucosinolate metabolic process	0.65	0.06	2.7093e-13
GO:0022900	electron transport chain	1.27	0.54	2.22086e-06
GO:0030001	metal ion transport	1.94	1.05	1.13478e-05
GO:0030003	cellular cation homeostasis	0.43	0.19	0.0162385
GO:0031347	regulation of defense response	0.52	0.12	3.53368e-06
GO:0031348	negative regulation of defense response	0.19	0.02	0.000587657
GO:0031407	oxylipin metabolic process	0.28	0.07	0.00227411
GO:0034050	host programmed cell death induced by symbiont	0.65	0.06	2.7093e-13
GO:0034620	cellular response to unfolded protein	0.09	0.01	0.0459741
GO:0034976	response to endoplasmic reticulum stress	0.13	0.03	0.0438725
GO:0042128	nitrate assimilation	0.17	0.03	0.00348773
GO:0042325	regulation of phosphorylation	0.24	0.08	0.0271337
GO:0042398	cellular modified amino acid biosynthetic process	1.21	0.54	1.45431e-05
GO:0042538	hyperosmotic salinity response	0.3	0.1	0.0111959
GO:0042594	response to starvation	0.5	0.16	0.000285804
GO:0042742	defense response to bacterium	1.88	0.34	2.57264e-25
GO:0042819	vitamin B6 biosynthetic process	0.09	0.01	0.0459741
GO:0042981	regulation of apoptotic process	0.17	0.03	0.00565853
GO:0043043	peptide biosynthetic process	0.48	0.24	0.0304705
GO:0043067	regulation of programmed cell death	0.35	0.04	3.57074e-06
GO:0043068	positive regulation of programmed cell death	0.09	0.01	0.0256092
GO:0043069	negative regulation of programmed cell death	0.17	0.02	0.00110805
GO:0043085	positive regulation of catalytic activity	0.28	0.06	0.000825045
GO:0043269	regulation of ion transport	0.11	0.01	0.025269
GO:0044262	cellular carbohydrate metabolic process	2.48	1.51	3.8502e-05
GO:0045087	innate immune response	3.26	0.52	5.69101e-48
GO:0045454	cell redox homeostasis	1.21	0.33	2.59297e-11
GO:0045730	respiratory burst	0.11	0	0.000587634
GO:0046246	terpene biosynthetic process	0.24	0.07	0.0104965
GO:0046283	anthocyanin metabolic process	0.19	0.06	0.0397949
GO:0046685	response to arsenic-containing substance	0.13	0.01	0.00368869
GO:0046686	response to cadmium ion	1.69	0.93	9.8026e-05
GO:0046836	glycolipid transport	0.09	0	0.0114238
GO:0048278	vesicle docking	0.24	0.09	0.0487163
GO:0048544	recognition of pollen	0.35	0.07	0.000119467
GO:0050832	defense response to fungus	1.17	0.12	3.56531e-22
GO:0051246	regulation of protein metabolic process	0.56	0.3	0.0278304
GO:0051347	positive regulation of transferase activity	0.17	0.03	0.00565853
GO:0051603	proteolysis involved in cellular protein catabolic process	2.2	1.67	0.0331324
GO:0051707	response to other organism	4.71	1.03	7.31793e-54
GO:0052386	cell wall thickening	0.3	0.02	2.05702e-07
GO:0052542	defense response by callose deposition	0.32	0.01	3.49415e-09
GO:0052543	callose deposition in cell wall	0.28	0.02	9.62505e-07
GO:0052544	defense response by callose deposition in cell wall	0.28	0.01	9.78267e-08
GO:0055085	transmembrane transport	1.3	0.72	0.000837823
	cellular component
GO-term ID	Term	Tested_list_percentage	Genome_percentage	adj_pvalue
GO:0000325	plant-type vacuole	0.5	0.17	0.000736654
GO:0005768	endosome	0.45	0.2	0.0138967
GO:0005773	vacuole	4.06	1.7	6.97532e-20
GO:0005777	peroxisome	0.91	0.41	0.000266745
GO:0008287	protein serine/threonine phosphatase complex	0.6	0.19	8.9638e-05
GO:0009288	bacterial-type flagellum	0.5	0.14	0.000106376
GO:0009509	chromoplast	0.09	0	0.0146224
GO:0009521	photosystem	0.56	0.17	8.9638e-05
GO:0009522	photosystem I	0.32	0.05	6.5291e-05
GO:0009579	thylakoid	3.87	1.13	1.10074e-32
GO:0010598	NAD(P)H dehydrogenase complex (plastoquinone)	0.17	0.01	0.000100543
GO:0019861	flagellum	0.5	0.15	0.000132363
GO:0030076	light-harvesting complex	0.26	0.07	0.0104752
GO:0031977	thylakoid lumen	0.78	0.19	6.80878e-08
GO:0042579	microbody	0.91	0.41	0.000266745
GO:0042651	thylakoid membrane	3.07	0.6	1.23333e-38
GO:0048046	apoplast	1.97	1.05	1.06272e-05
	molecular function
GO-term ID	Term	Tested_list_percentage	Genome_percentage	adj_pvalue
GO:0000155	phosphorelay sensor kinase activity	0.24	0.05	0.00453013
GO:0000287	magnesium ion binding	1.9	0.98	5.58871e-06
GO:0000293	ferric-chelate reductase activity	0.13	0.01	0.00262677
GO:0004021	L-alanine:2-oxoglutarate aminotransferase activity	0.09	0	0.0144553
GO:0004222	metalloendopeptidase activity	0.35	0.15	0.0288684
GO:0004364	glutathione transferase activity	0.6	0.09	2.27873e-09
GO:0004437	inositol or phosphatidylinositol phosphatase activity	0.28	0.09	0.015234
GO:0004497	monooxygenase activity	2.01	0.96	2.64027e-07
GO:0004602	glutathione peroxidase activity	0.13	0.01	0.00579218
GO:0004673	protein histidine kinase activity	0.24	0.05	0.00453013
GO:0004675	transmembrane receptor protein serine/threonine kinase activity	0.17	0.01	0.000931389
GO:0004707	MAP kinase activity	0.26	0.08	0.0160607
GO:0004712	protein serine/threonine/tyrosine kinase activity	0.5	0.13	6.49398e-05
GO:0004714	transmembrane receptor protein tyrosine kinase activity	0.11	0.01	0.00952851
GO:0004721	phosphoprotein phosphatase activity	1.19	0.57	0.000117664
GO:0004722	protein serine/threonine phosphatase activity	0.95	0.41	0.000112034
GO:0004806	triglyceride lipase activity	0.32	0.11	0.0111017
GO:0004842	ubiquitin-protein ligase activity	1.27	0.79	0.00991995
GO:0004871	signal transducer activity	6.61	2.57	2.30891e-36
GO:0004872	receptor activity	5.27	1.93	5.75835e-32
GO:0004888	transmembrane signaling receptor activity	2.72	0.74	2.57094e-24
GO:0005216	ion channel activity	0.95	0.36	8.57688e-06
GO:0005244	voltage-gated ion channel activity	0.56	0.25	0.00700642
GO:0005254	chloride channel activity	0.17	0.03	0.00833863
GO:0005261	cation channel activity	0.58	0.22	0.0012168
GO:0005267	potassium channel activity	0.41	0.2	0.0404586
GO:0005275	amine transmembrane transporter activity	0.58	0.21	0.000538836
GO:0005319	lipid transporter activity	0.24	0.07	0.0221202
GO:0005345	purine base transmembrane transporter activity	0.22	0.05	0.0079344
GO:0005351	sugar:hydrogen symporter activity	0.6	0.3	0.0111761
GO:0005496	steroid binding	0.95	0.4	7.89887e-05
GO:0005506	iron ion binding	3.89	2.03	4.38371e-11
GO:0005509	calcium ion binding	2.74	1.09	3.19875e-14
GO:0005516	calmodulin binding	1.19	0.49	4.32296e-06
GO:0005529	sugar binding	0.73	0.34	0.00228006
GO:0005543	phospholipid binding	0.56	0.24	0.00391423
GO:0008061	chitin binding	0.13	0.02	0.0160607
GO:0008113	peptide-methionine-(S)-S-oxide reductase activity	0.22	0.01	5.74207e-05
GO:0008194	UDP-glycosyltransferase activity	1.6	0.59	2.11513e-09
GO:0008289	lipid binding	2.05	1.08	4.66649e-06
GO:0008324	cation transmembrane transporter activity	3.09	1.98	6.22162e-05
GO:0008453	alanine-glyoxylate transaminase activity	0.09	0.01	0.0324395
GO:0008483	transaminase activity	0.35	0.14	0.0240759
GO:0008667	2,3-dihydro-2,3-dihydroxybenzoate dehydrogenase activity	0.45	0.22	0.0347143
GO:0008794	arsenate reductase (glutaredoxin) activity	0.24	0.01	4.66649e-06
GO:0008937	ferredoxin-NAD(P) reductase activity	0.11	0.01	0.00952851
GO:0009011	starch synthase activity	0.09	0.01	0.0324395
GO:0009881	photoreceptor activity	0.19	0.02	0.000995899
GO:0009927	histidine phosphotransfer kinase activity	0.13	0.01	0.00579218
GO:0010181	FMN binding	0.28	0.07	0.00498477
GO:0015035	protein disulfide oxidoreductase activity	0.63	0.1	3.43423e-09
GO:0015036	disulfide oxidoreductase activity	0.69	0.12	1.83486e-09
GO:0015075	ion transmembrane transporter activity	3.89	2.36	2.64027e-07
GO:0015085	calcium ion transmembrane transporter activity	0.15	0.04	0.0421092
GO:0015144	carbohydrate transmembrane transporter activity	0.67	0.36	0.0160607
GO:0015171	amino acid transmembrane transporter activity	0.48	0.16	0.00126066
GO:0015175	neutral amino acid transmembrane transporter activity	0.11	0.01	0.0314533
GO:0015197	peptide transporter activity	0.22	0.06	0.0136864
GO:0015198	oligopeptide transporter activity	0.22	0.04	0.00391423
GO:0015205	nucleobase transmembrane transporter activity	0.24	0.06	0.00833863
GO:0015238	drug transmembrane transporter activity	0.63	0.28	0.00494233
GO:0015239	multidrug transporter activity	0.17	0.04	0.0160607
GO:0015293	symporter activity	1.17	0.71	0.0111017
GO:0015297	antiporter activity	0.91	0.52	0.0135043
GO:0015399	primary active transmembrane transporter activity	1.36	0.8	0.00264038
GO:0015932	nucleobase-containing compound transmembrane transporter activity	0.3	0.13	0.0432041
GO:0016168	chlorophyll binding	0.28	0.06	0.00132961
GO:0016208	AMP binding	0.24	0.06	0.010769
GO:0016563	transcription activator activity	0.71	0.42	0.0343747
GO:0016564	transcription repressor activity	0.41	0.17	0.0127795
GO:0016627	oxidoreductase activity, acting on the CH-CH group of donors	0.78	0.45	0.0233273
GO:0016628	oxidoreductase activity, acting on the CH-CH group of donors, NAD or NADP as acceptor	0.54	0.29	0.0364013
GO:0016667	oxidoreductase activity, acting on a sulfur group of donors	1.21	0.19	1.56937e-17
GO:0016671	oxidoreductase activity, acting on a sulfur group of donors, disulfide as acceptor	0.41	0.04	1.8125e-07
GO:0016701	oxidoreductase activity, acting on single donors with incorporation of molecular oxygen	0.52	0.18	0.00108995
GO:0016702	oxidoreductase activity, acting on single donors with incorporation of molecular oxygen, incorporation of two atoms of oxygen	0.43	0.16	0.00619337
GO:0016705	oxidoreductase activity, acting on paired donors, with incorporation or reduction of molecular oxygen	1.1	0.66	0.00991995
GO:0016709	oxidoreductase activity, acting on paired donors, with incorporation or reduction of molecular oxygen, NADH or NADPH as one donor, and incorporation of one atom of oxygen	0.45	0.22	0.026996
GO:0016757	transferase activity, transferring glycosyl groups	2.51	1.43	6.73577e-06
GO:0016758	transferase activity, transferring hexosyl groups	2.14	1.11	1.5767e-06
GO:0016765	transferase activity, transferring alkyl or aryl (other than methyl) groups	0.89	0.34	3.31667e-05
GO:0016769	transferase activity, transferring nitrogenous groups	0.45	0.18	0.00791259
GO:0016783	sulfurtransferase activity	0.15	0.02	0.00597991
GO:0016791	phosphatase activity	1.86	0.88	4.5889e-07
GO:0016810	hydrolase activity, acting on carbon-nitrogen (but not peptide) bonds	0.67	0.34	0.0123193
GO:0016820	hydrolase activity, acting on acid anhydrides, catalyzing transmembrane movement of substances	1.19	0.65	0.00197724
GO:0016829	lyase activity	1.84	1.16	0.00224462
GO:0016846	carbon-sulfur lyase activity	0.43	0.11	0.0001955
GO:0016847	1-aminocyclopropane-1-carboxylate synthase activity	0.32	0.06	0.000156675
GO:0016879	ligase activity, forming carbon-nitrogen bonds	1.69	1.05	0.00301317
GO:0016881	acid-amino acid ligase activity	1.4	0.88	0.00753342
GO:0017089	glycolipid transporter activity	0.09	0	0.0144553
GO:0019144	ADP-sugar diphosphatase activity	0.11	0.01	0.0172608
GO:0019787	small conjugating protein ligase activity	1.36	0.81	0.00348843
GO:0019825	oxygen binding	1.51	0.61	1.01204e-07
GO:0020037	heme binding	1.97	1.12	7.89887e-05
GO:0030145	manganese ion binding	1.69	0.66	4.59245e-09
GO:0030151	molybdenum ion binding	0.17	0.01	0.000381286
GO:0030170	pyridoxal phosphate binding	0.78	0.34	0.000995899
GO:0030246	carbohydrate binding	1.3	0.63	7.16492e-05
GO:0030551	cyclic nucleotide binding	0.26	0.07	0.00833863
GO:0030552	cAMP binding	0.19	0.04	0.0132962
GO:0030553	cGMP binding	0.19	0.04	0.00978654
GO:0030611	arsenate reductase activity	0.26	0.01	1.12662e-06
GO:0035091	phosphatidylinositol binding	0.39	0.17	0.0223916
GO:0035251	UDP-glucosyltransferase activity	0.86	0.3	5.43178e-06
GO:0042578	phosphoric ester hydrolase activity	2.14	1.07	4.16426e-07
GO:0043295	glutathione binding	0.17	0.01	0.000128343
GO:0045551	cinnamyl-alcohol dehydrogenase activity	0.15	0.03	0.0211455
GO:0046527	glucosyltransferase activity	0.99	0.35	1.78369e-06
GO:0046873	metal ion transmembrane transporter activity	1.12	0.6	0.00152007
GO:0046906	tetrapyrrole binding	2.25	1.19	1.5767e-06
GO:0047631	ADP-ribose diphosphatase activity	0.09	0.01	0.0324395
GO:0048037	cofactor binding	3.07	1.68	7.01619e-08
GO:0050403	trans-zeatin O-beta-D-glucosyltransferase activity	0.09	0	0.0144553
GO:0050502	cis-zeatin O-beta-D-glucosyltransferase activity	0.09	0	0.0144553
GO:0050660	flavin adenine dinucleotide binding	1.14	0.48	9.41454e-06
GO:0050662	coenzyme binding	2.14	1.21	2.85497e-05
GO:0051119	sugar transmembrane transporter activity	0.65	0.33	0.0111017
GO:0051213	dioxygenase activity	0.43	0.17	0.00848389
GO:0051536	iron-sulfur cluster binding	0.65	0.24	0.000397873
GO:0051537	2 iron, 2 sulfur cluster binding	0.28	0.08	0.00650289
GO:0051861	glycolipid binding	0.09	0	0.0144553
GO:0080043	quercetin 3-O-glucosyltransferase activity	0.19	0.05	0.0234578
GO:0080044	quercetin 7-O-glucosyltransferase activity	0.15	0.04	0.0421092

## Sheet: L<I
	biological process
GO-term ID	Term	Tested_list_percentage	Genome_percentage	adj_pvalue
GO:0000087	M phase of mitotic cell cycle	0.33	0.09	0.00151483
GO:0000226	microtubule cytoskeleton organization	0.37	0.08	0.00012524
GO:0000278	mitotic cell cycle	0.47	0.15	0.000670897
GO:0000280	nuclear division	0.35	0.09	0.00123127
GO:0000902	cell morphogenesis	1.18	0.59	0.000192844
GO:0000910	cytokinesis	0.39	0.08	4.43888e-05
GO:0000911	cytokinesis by cell plate formation	0.18	0.03	0.00393639
GO:0000914	phragmoplast assembly	0.1	0	0.00120879
GO:0001510	RNA methylation	0.14	0.03	0.0443781
GO:0001708	cell fate specification	0.2	0.06	0.0210478
GO:0006071	gene silencing	0.67	0.33	0.00473645
GO:0006085	acetyl-CoA biosynthetic process	0.1	0.01	0.0240727
GO:0006259	DNA metabolic process	3.28	2.37	0.00205861
GO:0006260	DNA replication	1.34	0.9	0.0207702
GO:0006261	DNA-dependent DNA replication	0.47	0.12	4.32392e-05
GO:0006265	DNA topological change	0.22	0.08	0.0359349
GO:0006268	DNA unwinding involved in replication	0.14	0.02	0.00709576
GO:0006270	DNA-dependent DNA replication initiation	0.18	0.02	0.000784003
GO:0006281	DNA repair	1.3	0.53	3.95754e-07
GO:0006304	DNA modification	0.35	0.08	0.000495745
GO:0006306	DNA methylation	0.33	0.08	0.00118915
GO:0006310	DNA recombination	0.53	0.18	0.000389334
GO:0006325	chromatin organization	1.91	0.65	1.53372e-13
GO:0006333	chromatin assembly or disassembly	1.04	0.34	1.08792e-07
GO:0006334	nucleosome assembly	0.9	0.21	5.60084e-10
GO:0006364	rRNA processing	0.73	0.34	0.00188031
GO:0006629	lipid metabolic process	3.44	2.53	0.0026138
GO:0006631	fatty acid metabolic process	1.04	0.64	0.0146736
GO:0006633	fatty acid biosynthetic process	0.86	0.46	0.00499102
GO:0006730	one-carbon metabolic process	0.73	0.36	0.00373928
GO:0006974	response to DNA damage stimulus	1.34	0.54	2.9382e-07
GO:0007010	cytoskeleton organization	1.04	0.28	6.52471e-10
GO:0007017	microtubule-based process	1.36	0.23	1.91628e-19
GO:0007018	microtubule-based movement	1.02	0.12	1.34336e-18
GO:0007047	cellular cell wall organization	1.87	0.91	6.11953e-07
GO:0007049	cell cycle	2.28	0.58	1.21017e-22
GO:0007050	cell cycle arrest	0.1	0.01	0.0240727
GO:0007059	chromosome segregation	0.22	0.05	0.00421108
GO:0007067	mitosis	0.33	0.08	0.00118915
GO:0007126	meiosis	0.47	0.08	6.11953e-07
GO:0007169	transmembrane receptor protein tyrosine kinase signaling pathway	0.73	0.36	0.00322132
GO:0007267	cell-cell signaling	0.33	0.09	0.00197302
GO:0007276	gamete generation	0.22	0.05	0.00421108
GO:0007389	pattern specification process	0.79	0.28	1.81192e-05
GO:0008283	cell proliferation	0.33	0.14	0.0367079
GO:0008356	asymmetric cell division	0.1	0.01	0.0240727
GO:0008361	regulation of cell size	1.16	0.68	0.0041371
GO:0009553	embryo sac development	0.49	0.2	0.00435897
GO:0009555	pollen development	0.81	0.28	8.6917e-06
GO:0009556	microsporogenesis	0.18	0.03	0.0022765
GO:0009567	double fertilization forming a zygote and endosperm	0.18	0.05	0.0364582
GO:0009653	anatomical structure morphogenesis	3.08	1.25	3.6053e-16
GO:0009740	gibberellic acid mediated signaling pathway	0.24	0.09	0.0346543
GO:0009790	embryo development	1.79	1.18	0.00428358
GO:0009791	post-embryonic development	4.28	2.62	3.94334e-08
GO:0009793	embryo development ending in seed dormancy	1.65	1.07	0.00437902
GO:0009799	specification of symmetry	0.1	0	0.00120879
GO:0009826	unidimensional cell growth	0.92	0.43	0.000491635
GO:0009832	plant-type cell wall biogenesis	0.43	0.12	0.000266395
GO:0009834	secondary cell wall biogenesis	0.2	0.03	0.00136313
GO:0009856	pollination	0.63	0.36	0.0428289
GO:0009887	organ morphogenesis	1.16	0.42	1.43606e-07
GO:0009892	negative regulation of metabolic process	1	0.54	0.00244499
GO:0009908	flower development	2.12	0.7	1.30012e-15
GO:0009932	cell tip growth	0.49	0.16	0.000506351
GO:0009933	meristem structural organization	0.35	0.09	0.000969878
GO:0009934	regulation of meristem structural organization	0.2	0.03	0.00136313
GO:0009943	adaxial/abaxial axis specification	0.26	0.02	8.6917e-06
GO:0009944	polarity specification of adaxial/abaxial axis	0.24	0.02	5.73444e-06
GO:0009954	proximal/distal pattern formation	0.1	0	0.00120879
GO:0009955	adaxial/abaxial pattern specification	0.31	0.03	6.85379e-06
GO:0009958	positive gravitropism	0.14	0.02	0.0123809
GO:0009965	leaf morphogenesis	0.53	0.28	0.0312776
GO:0010016	shoot morphogenesis	0.75	0.39	0.00522521
GO:0010073	meristem maintenance	0.43	0.1	6.47521e-05
GO:0010074	maintenance of meristem identity	0.18	0.04	0.00901881
GO:0010075	regulation of meristem growth	0.16	0.04	0.0351266
GO:0010084	specification of organ axis polarity	0.24	0.02	1.44401e-05
GO:0010103	stomatal complex morphogenesis	0.18	0.02	0.00136313
GO:0010154	fruit development	1.93	1.29	0.00419735
GO:0010166	wax metabolic process	0.18	0.03	0.0022765
GO:0010208	pollen wall assembly	0.26	0.02	3.70979e-06
GO:0010212	response to ionizing radiation	0.16	0.02	0.0022765
GO:0010252	auxin homeostasis	0.14	0.03	0.0312776
GO:0010332	response to gamma radiation	0.12	0.01	0.00662644
GO:0010374	stomatal complex development	0.26	0.04	0.000258296
GO:0010476	gibberellin mediated signaling pathway	0.24	0.09	0.0346543
GO:0010584	pollen exine formation	0.22	0.01	8.09546e-06
GO:0016049	cell growth	1.1	0.66	0.00863293
GO:0016126	sterol biosynthetic process	0.22	0.08	0.0447962
GO:0016458	glycerol metabolic process	0.24	0.06	0.00473645
GO:0016568	chromatin modification	0.98	0.33	3.95754e-07
GO:0016570	histone modification	0.37	0.15	0.0150186
GO:0019827	stem cell maintenance	0.22	0.05	0.00421108
GO:0019953	sexual reproduction	0.69	0.16	1.08792e-07
GO:0022621	shoot system development	1.51	0.76	2.84038e-05
GO:0030029	actin filament-based process	0.57	0.21	0.000706428
GO:0030036	actin cytoskeleton organization	0.45	0.16	0.00194251
GO:0030154	cell differentiation	2.16	0.78	4.93371e-14
GO:0030261	chromosome condensation	0.08	0.01	0.0434237
GO:0032259	methylation	0.67	0.25	0.000229051
GO:0032504	multicellular organism reproduction	0.39	0.14	0.00419735
GO:0032508	DNA duplex unwinding	0.16	0.03	0.00668291
GO:0035266	meristem growth	0.16	0.05	0.0474025
GO:0040029	regulation of gene expression, epigenetic	0.81	0.45	0.0111743
GO:0042127	regulation of cell proliferation	0.2	0.05	0.0150334
GO:0042254	ribosome biogenesis	2.38	0.48	1.4857e-29
GO:0042309	homoiothermy	0.49	0.2	0.00511444
GO:0042545	cell wall modification	0.67	0.39	0.0346543
GO:0042546	cell wall biogenesis	0.49	0.18	0.00180172
GO:0043086	negative regulation of catalytic activity	0.41	0.17	0.0150334
GO:0045814	negative regulation of gene expression, epigenetic	0.22	0.04	0.001302
GO:0048229	gametophyte development	1.26	0.43	6.83954e-09
GO:0048232	male gamete generation	0.14	0.03	0.0312776
GO:0048235	pollen sperm cell differentiation	0.14	0.01	0.00194251
GO:0048316	seed development	1.81	1.24	0.0101132
GO:0048366	leaf development	0.96	0.47	0.0009324
GO:0048367	shoot development	1.51	0.75	1.90751e-05
GO:0048437	floral organ development	1.16	0.23	7.28415e-15
GO:0048438	floral whorl development	1.12	0.18	8.65872e-17
GO:0048439	flower morphogenesis	0.08	0	0.0189908
GO:0048440	carpel development	0.45	0.1	2.55072e-05
GO:0048441	petal development	0.22	0.02	5.39497e-05
GO:0048443	stamen development	0.47	0.06	7.18804e-08
GO:0048444	floral organ morphogenesis	0.26	0.05	0.00105601
GO:0048467	gynoecium development	0.53	0.11	1.06829e-06
GO:0048507	meristem development	0.75	0.28	5.87869e-05
GO:0048509	regulation of meristem development	0.35	0.12	0.00855294
GO:0048513	organ development	3.48	1.69	8.85201e-13
GO:0048569	post-embryonic organ development	1.18	0.23	2.54351e-15
GO:0048589	developmental growth	1.26	0.53	2.12549e-06
GO:0048638	regulation of developmental growth	0.2	0.06	0.0364582
GO:0048645	organ formation	0.29	0.07	0.00172017
GO:0048825	cotyledon development	0.26	0.05	0.00105601
GO:0048827	phyllome development	1.16	0.51	1.55682e-05
GO:0048864	stem cell development	0.24	0.05	0.00172017
GO:0048868	pollen tube development	0.49	0.19	0.0021239
GO:0050826	response to freezing	0.53	0.24	0.00709783
GO:0051258	protein polymerization	0.33	0.12	0.011187
GO:0051276	chromosome organization	2.26	0.74	1.08076e-16
GO:0051301	cell division	1.57	0.39	3.6053e-16
GO:0051726	regulation of cell cycle	0.98	0.23	6.98145e-11
	cellular component
GO-term ID	Term	Tested_list_percentage	Genome_percentage	adj_pvalue
GO:0000793	condensed chromosome	0.18	0.02	0.000419389
GO:0005618	cell wall	3.28	1.69	4.30975e-11
GO:0005694	chromosome	2.12	0.72	1.21083e-15
GO:0005829	cytosol	5.34	1.82	7.8745e-39
GO:0005840	ribosome	5.34	1.09	3.84122e-69
GO:0005856	cytoskeleton	2.38	0.78	2.18105e-18
GO:0005938	cell cortex	0.31	0.12	0.0246829
GO:0009295	nucleoid	0.24	0.09	0.0296245
GO:0009341	beta-galactosidase complex	0.26	0.07	0.00402941
GO:0009360	DNA polymerase III complex	0.08	0	0.0164481
GO:0009505	plant-type cell wall	1.38	0.76	0.000218844
GO:0009524	phragmoplast	0.35	0.11	0.00334494
GO:0015630	microtubule cytoskeleton	1.71	0.31	3.07373e-24
GO:0016324	apical plasma membrane	0.14	0.02	0.00313924
GO:0022626	cytosolic ribosome	4.3	0.39	1.86872e-92
GO:0030529	ribonucleoprotein complex	6.17	1.69	1.11528e-59
GO:0031225	anchored to membrane	1.91	0.6	6.31369e-16
GO:0031226	intrinsic to plasma membrane	0.79	0.33	0.000115442
GO:0044445	cytosolic part	4.05	0.3	9.7196e-95
GO:0045177	apical part of cell	0.2	0.02	0.000115442
GO:0046658	anchored to plasma membrane	0.59	0.14	4.87981e-07
	molecular function
GO-term ID	Term	Tested_list_percentage	Genome_percentage	adj_pvalue
GO:0003735	structural constituent of ribosome	5.11	0.81	1.48102e-79
GO:0003774	motor activity	1.08	0.22	2.86774e-13
GO:0003777	microtubule motor activity	0.88	0.1	1.49568e-15
GO:0003841	1-acylglycerol-3-phosphate O-acyltransferase activity	0.12	0.02	0.0375761
GO:0003887	DNA-directed DNA polymerase activity	0.31	0.05	0.00034574
GO:0004091	carboxylesterase activity	1.87	1.02	5.62005e-05
GO:0004386	helicase activity	0.9	0.52	0.0375761
GO:0004553	hydrolase activity, hydrolyzing O-glycosyl compounds	2.4	1.28	1.46466e-06
GO:0004565	beta-galactosidase activity	0.31	0.09	0.0173978
GO:0004650	polygalacturonase activity	0.47	0.19	0.0155684
GO:0004693	cyclin-dependent protein kinase activity	0.31	0.1	0.0226297
GO:0004857	enzyme inhibitor activity	1.14	0.58	0.00108499
GO:0005200	structural constituent of cytoskeleton	0.26	0.08	0.0276372
GO:0008017	microtubule binding	0.33	0.05	6.38656e-05
GO:0008092	cytoskeletal protein binding	0.79	0.33	0.000713884
GO:0008276	protein methyltransferase activity	0.35	0.11	0.0147474
GO:0008408	3'-5' exonuclease activity	0.26	0.07	0.0139057
GO:0008889	glycerophosphodiester phosphodiesterase activity	0.16	0.02	0.00894093
GO:0010279	indole-3-acetic acid amido synthetase activity	0.1	0	0.0147474
GO:0015631	tubulin binding	0.41	0.06	6.59992e-06
GO:0016538	cyclin-dependent protein kinase regulator activity	0.47	0.05	5.98268e-09
GO:0016798	hydrolase activity, acting on glycosyl bonds	2.48	1.35	1.90636e-06
GO:0016887	ATPase activity	2.3	1.59	0.0133043
GO:0018024	histone-lysine N-methyltransferase activity	0.26	0.08	0.0276372
GO:0019843	rRNA binding	0.65	0.19	2.57019e-05
GO:0019887	protein kinase regulator activity	0.47	0.08	1.46466e-06
GO:0030570	pectate lyase activity	0.22	0.06	0.0263679
GO:0030599	pectinesterase activity	0.94	0.4	0.000190568
GO:0032549	ribonucleoside binding	0.1	0.01	0.0333245
GO:0042054	histone methyltransferase activity	0.31	0.09	0.0124864
GO:0043565	sequence-specific DNA binding	2.24	1.53	0.0121825
GO:0046910	pectinesterase inhibitor activity	0.57	0.14	6.59992e-06
GO:0050825	ice binding	0.49	0.2	0.0168263

## Sheet: t0>I
	biological process
GO-term ID	Term	Tested_list_percentage	Genome_percentage	adj_pvalue
GO:0000087	mitotic M phase	0.33	0.09	1.51483E-3
GO:0000226	microtubule cytoskeleton organization	0.37	0.08	1.2524E-4
GO:0000278	mitotic cell cycle	0.47	0.15	6.70897E-4
GO:0000280	nuclear division	0.35	0.09	1.23127E-3
GO:0000902	cell morphogenesis	1.18	0.59	1.92844E-4
GO:0000910	cytokinesis	0.39	0.08	4.43888E-5
GO:0000911	cytokinesis by cell plate formation	0.18	0.03	3.93639E-3
GO:0000914	phragmoplast assembly	0.1	0	1.20879E-3
GO:0001510	RNA methylation	0.14	0.03	4.43781E-2
GO:0001708	cell fate specification	0.2	0.06	2.10478E-2
GO:0006071	glycerol metabolic process	0.24	0.06	4.73645E-3
GO:0006085	acetyl-CoA biosynthetic process	0.1	0.01	2.40727E-2
GO:0006259	DNA metabolic process	3.28	2.37	2.05861E-3
GO:0006260	DNA replication	1.34	0.9	2.07702E-2
GO:0006261	DNA-dependent DNA replication	0.47	0.12	4.32392E-5
GO:0006265	DNA topological change	0.22	0.08	3.59349E-2
GO:0006268	DNA unwinding involved in DNA replication	0.14	0.02	7.09576E-3
GO:0006270	DNA replication initiation	0.18	0.02	7.84003E-4
GO:0006281	DNA repair	1.3	0.53	3.95754E-7
GO:0006304	DNA modification	0.35	0.08	4.95745E-4
GO:0006306	DNA methylation	0.33	0.08	1.18915E-3
GO:0006310	DNA recombination	0.53	0.18	3.89334E-4
GO:0006325	chromatin organization	1.91	0.65	1.53372E-13
GO:0006333	chromatin assembly or disassembly	1.04	0.34	1.08792E-7
GO:0006334	nucleosome assembly	0.9	0.21	5.60084E-10
GO:0006364	rRNA processing	0.73	0.34	1.88031E-3
GO:0006629	lipid metabolic process	3.44	2.53	2.6138E-3
GO:0006631	fatty acid metabolic process	1.04	0.64	1.46736E-2
GO:0006633	fatty acid biosynthetic process	0.86	0.46	4.99102E-3
GO:0006730	one-carbon metabolic process	0.73	0.36	3.73928E-3
GO:0006974	cellular response to DNA damage stimulus	1.34	0.54	2.9382E-7
GO:0007010	cytoskeleton organization	1.04	0.28	6.52471E-10
GO:0007017	microtubule-based process	1.36	0.23	1.91628E-19
GO:0007018	microtubule-based movement	1.02	0.12	1.34336E-18
GO:0007047	cell wall organization	1.87	0.91	6.11953E-7
GO:0007049	cell cycle	2.28	0.58	1.21017E-22
GO:0007050	cell cycle arrest	0.1	0.01	2.40727E-2
GO:0007059	chromosome segregation	0.22	0.05	4.21108E-3
GO:0007067	mitotic nuclear division	0.33	0.08	1.18915E-3
GO:0007126	meiotic nuclear division	0.47	0.08	6.11953E-7
GO:0007169	transmembrane receptor protein tyrosine kinase signaling pathway	0.73	0.36	3.22132E-3
GO:0007267	cell-cell signaling	0.33	0.09	1.97302E-3
GO:0007276	gamete generation	0.22	0.05	4.21108E-3
GO:0007389	pattern specification process	0.79	0.28	1.81192E-5
GO:0008283	cell proliferation	0.33	0.14	3.67079E-2
GO:0008356	asymmetric cell division	0.1	0.01	2.40727E-2
GO:0008361	regulation of cell size	1.16	0.68	4.1371E-3
GO:0009553	embryo sac development	0.49	0.2	4.35897E-3
GO:0009555	pollen development	0.81	0.28	8.6917E-6
GO:0009556	microsporogenesis	0.18	0.03	2.2765E-3
GO:0009567	double fertilization forming a zygote and endosperm	0.18	0.05	3.64582E-2
GO:0009653	anatomical structure morphogenesis	3.08	1.25	3.6053E-16
GO:0009740	gibberellic acid mediated signaling pathway	0.24	0.09	3.46543E-2
GO:0009790	embryo development	1.79	1.18	4.28358E-3
GO:0009791	post-embryonic development	4.28	2.62	3.94334E-8
GO:0009793	embryo development ending in seed dormancy	1.65	1.07	4.37902E-3
GO:0009799	specification of symmetry	0.1	0	1.20879E-3
GO:0009826	unidimensional cell growth	0.92	0.43	4.91635E-4
GO:0009832	plant-type cell wall biogenesis	0.43	0.12	2.66395E-4
GO:0009834	plant-type secondary cell wall biogenesis	0.2	0.03	1.36313E-3
GO:0009856	pollination	0.63	0.36	4.28289E-2
GO:0009887	organ morphogenesis	1.16	0.42	1.43606E-7
GO:0009892	negative regulation of metabolic process	1	0.54	2.44499E-3
GO:0009908	flower development	2.12	0.7	1.30012E-15
GO:0009932	cell tip growth	0.49	0.16	5.06351E-4
GO:0009933	meristem structural organization	0.35	0.09	9.69878E-4
GO:0009934	regulation of meristem structural organization	0.2	0.03	1.36313E-3
GO:0009943	adaxial/abaxial axis specification	0.26	0.02	8.6917E-6
GO:0009944	polarity specification of adaxial/abaxial axis	0.24	0.02	5.73444E-6
GO:0009954	proximal/distal pattern formation	0.1	0	1.20879E-3
GO:0009955	adaxial/abaxial pattern specification	0.31	0.03	6.85379E-6
GO:0009958	positive gravitropism	0.14	0.02	1.23809E-2
GO:0009965	leaf morphogenesis	0.53	0.28	3.12776E-2
GO:0010016	shoot system morphogenesis	0.75	0.39	5.22521E-3
GO:0010073	meristem maintenance	0.43	0.1	6.47521E-5
GO:0010074	maintenance of meristem identity	0.18	0.04	9.01881E-3
GO:0010075	regulation of meristem growth	0.16	0.04	3.51266E-2
GO:0010084	specification of organ axis polarity	0.24	0.02	1.44401E-5
GO:0010103	stomatal complex morphogenesis	0.18	0.02	1.36313E-3
GO:0010154	fruit development	1.93	1.29	4.19735E-3
GO:0010166	wax metabolic process	0.18	0.03	2.2765E-3
GO:0010208	pollen wall assembly	0.26	0.02	3.70979E-6
GO:0010212	response to ionizing radiation	0.16	0.02	2.2765E-3
GO:0010252	auxin homeostasis	0.14	0.03	3.12776E-2
GO:0010332	response to gamma radiation	0.12	0.01	6.62644E-3
GO:0010374	stomatal complex development	0.26	0.04	2.58296E-4
GO:0010476	gibberellin mediated signaling pathway	0.24	0.09	3.46543E-2
GO:0010584	pollen exine formation	0.22	0.01	8.09546E-6
GO:0016049	cell growth	1.1	0.66	8.63293E-3
GO:0016126	sterol biosynthetic process	0.22	0.08	4.47962E-2
GO:0016458	gene silencing	0.67	0.33	4.73645E-3
GO:0016568	chromatin modification	0.98	0.33	3.95754E-7
GO:0016570	histone modification	0.37	0.15	1.50186E-2
GO:0019827	stem cell maintenance	0.22	0.05	4.21108E-3
GO:0019953	sexual reproduction	0.69	0.16	1.08792E-7
GO:0022621	shoot system development	1.51	0.76	2.84038E-5
GO:0030029	actin filament-based process	0.57	0.21	7.06428E-4
GO:0030036	actin cytoskeleton organization	0.45	0.16	1.94251E-3
GO:0030154	cell differentiation	2.16	0.78	4.93371E-14
GO:0030261	chromosome condensation	0.08	0.01	4.34237E-2
GO:0032259	methylation	0.67	0.25	2.29051E-4
GO:0032504	multicellular organism reproduction	0.39	0.14	4.19735E-3
GO:0032508	DNA duplex unwinding	0.16	0.03	6.68291E-3
GO:0035266	meristem growth	0.16	0.05	4.74025E-2
GO:0040029	regulation of gene expression, epigenetic	0.81	0.45	1.11743E-2
GO:0042127	regulation of cell proliferation	0.2	0.05	1.50334E-2
GO:0042254	ribosome biogenesis	2.38	0.48	1.4857E-29
GO:0042309	homoiothermy	0.49	0.2	5.11444E-3
GO:0042545	cell wall modification	0.67	0.39	3.46543E-2
GO:0042546	cell wall biogenesis	0.49	0.18	1.80172E-3
GO:0043086	negative regulation of catalytic activity	0.41	0.17	1.50334E-2
GO:0045814	negative regulation of gene expression, epigenetic	0.22	0.04	1.302E-3
GO:0048229	gametophyte development	1.26	0.43	6.83954E-9
GO:0048232	male gamete generation	0.14	0.03	3.12776E-2
GO:0048235	pollen sperm cell differentiation	0.14	0.01	1.94251E-3
GO:0048316	seed development	1.81	1.24	1.01132E-2
GO:0048366	leaf development	0.96	0.47	9.324E-4
GO:0048367	shoot system development	1.51	0.75	1.90751E-5
GO:0048437	floral organ development	1.16	0.23	7.28415E-15
GO:0048438	floral whorl development	1.12	0.18	8.65872E-17
GO:0048439	flower morphogenesis	0.08	0	1.89908E-2
GO:0048440	carpel development	0.45	0.1	2.55072E-5
GO:0048441	petal development	0.22	0.02	5.39497E-5
GO:0048443	stamen development	0.47	0.06	7.18804E-8
GO:0048444	floral organ morphogenesis	0.26	0.05	1.05601E-3
GO:0048467	gynoecium development	0.53	0.11	1.06829E-6
GO:0048507	meristem development	0.75	0.28	5.87869E-5
GO:0048509	regulation of meristem development	0.35	0.12	8.55294E-3
GO:0048513	organ development	3.48	1.69	8.85201E-13
GO:0048569	post-embryonic organ development	1.18	0.23	2.54351E-15
GO:0048589	developmental growth	1.26	0.53	2.12549E-6
GO:0048638	regulation of developmental growth	0.2	0.06	3.64582E-2
GO:0048645	organ formation	0.29	0.07	1.72017E-3
GO:0048825	cotyledon development	0.26	0.05	1.05601E-3
GO:0048827	phyllome development	1.16	0.51	1.55682E-5
GO:0048864	stem cell development	0.24	0.05	1.72017E-3
GO:0048868	pollen tube development	0.49	0.19	2.1239E-3
GO:0050826	response to freezing	0.53	0.24	7.09783E-3
GO:0051258	protein polymerization	0.33	0.12	1.1187E-2
GO:0051276	chromosome organization	2.26	0.74	1.08076E-16
GO:0051301	cell division	1.57	0.39	3.6053E-16
GO:0051726	regulation of cell cycle	0.98	0.23	6.98145E-11
	cellular component
GO-term ID	Term	Tested_list_percentage	Genome_percentage	adj_pvalue
GO:0000793	condensed chromosome	0.18	0.02	4.19389E-4
GO:0005618	cell wall	3.28	1.69	4.30975E-11
GO:0005694	chromosome	2.12	0.72	1.21083E-15
GO:0005829	cytosol	5.34	1.82	7.8745E-39
GO:0005840	ribosome	5.34	1.09	3.84122E-69
GO:0005856	cytoskeleton	2.38	0.78	2.18105E-18
GO:0005938	cell cortex	0.31	0.12	2.46829E-2
GO:0009295	nucleoid	0.24	0.09	2.96245E-2
GO:0009341	beta-galactosidase complex	0.26	0.07	4.02941E-3
GO:0009360	DNA polymerase III complex	0.08	0	1.64481E-2
GO:0009505	plant-type cell wall	1.38	0.76	2.18844E-4
GO:0009524	phragmoplast	0.35	0.11	3.34494E-3
GO:0015630	microtubule cytoskeleton	1.71	0.31	3.07373E-24
GO:0016324	apical plasma membrane	0.14	0.02	3.13924E-3
GO:0022626	cytosolic ribosome	4.3	0.39	1.86872E-92
GO:0030529	ribonucleoprotein complex	6.17	1.69	1.11528E-59
GO:0031225	anchored component of membrane	1.91	0.6	6.31369E-16
GO:0031226	intrinsic component of plasma membrane	0.79	0.33	1.15442E-4
GO:0044445	cytosolic part	4.05	0.3	9.7196E-95
GO:0045177	apical part of cell	0.2	0.02	1.15442E-4
GO:0046658	anchored component of plasma membrane	0.59	0.14	4.87981E-7
	molecular function
GO-term ID	Term	Tested_list_percentage	Genome_percentage	adj_pvalue
GO:0003735	structural constituent of ribosome	5.11	0.81	1.48102E-79
GO:0003774	motor activity	1.08	0.22	2.86774E-13
GO:0003777	microtubule motor activity	0.88	0.1	1.49568E-15
GO:0003841	1-acylglycerol-3-phosphate O-acyltransferase activity	0.12	0.02	3.75761E-2
GO:0003887	DNA-directed DNA polymerase activity	0.31	0.05	3.4574E-4
GO:0004091	carboxylic ester hydrolase activity	1.87	1.02	5.62005E-5
GO:0004386	helicase activity	0.9	0.52	3.75761E-2
GO:0004553	hydrolase activity, hydrolyzing O-glycosyl compounds	2.4	1.28	1.46466E-6
GO:0004565	beta-galactosidase activity	0.31	0.09	1.73978E-2
GO:0004650	polygalacturonase activity	0.47	0.19	1.55684E-2
GO:0004693	cyclin-dependent protein serine/threonine kinase activity	0.31	0.1	2.26297E-2
GO:0004857	enzyme inhibitor activity	1.14	0.58	1.08499E-3
GO:0005200	structural constituent of cytoskeleton	0.26	0.08	2.76372E-2
GO:0008017	microtubule binding	0.33	0.05	6.38656E-5
GO:0008092	cytoskeletal protein binding	0.79	0.33	7.13884E-4
GO:0008276	protein methyltransferase activity	0.35	0.11	1.47474E-2
GO:0008408	3'-5' exonuclease activity	0.26	0.07	1.39057E-2
GO:0008889	glycerophosphodiester phosphodiesterase activity	0.16	0.02	8.94093E-3
GO:0010279	indole-3-acetic acid amido synthetase activity	0.1	0	1.47474E-2
GO:0015631	tubulin binding	0.41	0.06	6.59992E-6
GO:0016538	cyclin-dependent protein serine/threonine kinase regulator activity	0.47	0.05	5.98268E-9
GO:0016798	hydrolase activity, acting on glycosyl bonds	2.48	1.35	1.90636E-6
GO:0016887	ATPase activity	2.3	1.59	1.33043E-2
GO:0018024	histone-lysine N-methyltransferase activity	0.26	0.08	2.76372E-2
GO:0019843	rRNA binding	0.65	0.19	2.57019E-5
GO:0019887	protein kinase regulator activity	0.47	0.08	1.46466E-6
GO:0030570	pectate lyase activity	0.22	0.06	2.63679E-2
GO:0030599	pectinesterase activity	0.94	0.4	1.90568E-4
GO:0032549	ribonucleoside binding	0.1	0.01	3.33245E-2
GO:0042054	histone methyltransferase activity	0.31	0.09	1.24864E-2
GO:0043565	sequence-specific DNA binding	2.24	1.53	1.21825E-2
GO:0046910	pectinesterase inhibitor activity	0.57	0.14	6.59992E-6
GO:0050825	ice binding	0.49	0.2	1.68263E-2

## Sheet: t0<I
	biological process
GO-term ID	Term	Tested_list_percentage	Genome_percentage	adj_pvalue
GO:0005976	polysaccharide metabolic process	1.23	0.75	0.0289242
GO:0006066	alcohol metabolic process	2.2	1.2	6.42144e-05
GO:0006071	glycerol metabolic process	0.26	0.07	0.0182683
GO:0006629	lipid metabolic process	4.83	2.36	5.75312e-14
GO:0006631	fatty acid metabolic process	1.56	0.58	1.3438e-07
GO:0006633	fatty acid biosynthetic process	1.05	0.44	0.000255516
GO:0006725	cellular aromatic compound metabolic process	2.15	1.34	0.00310717
GO:0006790	sulfur compound metabolic process	0.89	0.51	0.0356633
GO:0006811	ion transport	2.78	1.99	0.0148012
GO:0006812	cation transport	2.35	1.63	0.0157229
GO:0006857	oligopeptide transport	0.54	0.18	0.0021432
GO:0006865	amino acid transport	0.49	0.19	0.0145812
GO:0006869	lipid transport	0.89	0.43	0.00458158
GO:0006952	defense response	3.81	2.49	0.000117097
GO:0006979	response to oxidative stress	1.4	0.84	0.00969413
GO:0007047	cellular cell wall organization	1.92	0.94	1.31653e-05
GO:0008610	lipid biosynthetic process	2.43	1.32	1.62674e-05
GO:0008643	carbohydrate transport	0.66	0.25	0.00162894
GO:0009063	cellular amino acid catabolic process	0.51	0.09	5.54326e-06
GO:0009266	response to temperature stimulus	2.12	1.23	0.000463217
GO:0009269	response to desiccation	0.18	0.04	0.0470429
GO:0009314	response to radiation	2.15	1.42	0.00938787
GO:0009409	response to cold	1.89	0.84	1.34638e-06
GO:0009416	response to light stimulus	2.15	1.38	0.0049713
GO:0009555	pollen development	0.72	0.32	0.0062868
GO:0009607	response to biotic stimulus	2.71	1.63	0.000159594
GO:0009611	response to wounding	0.89	0.49	0.0237229
GO:0009617	response to bacterium	1.25	0.69	0.0058151
GO:0009624	response to nematode	0.43	0.14	0.00514709
GO:0009637	response to blue light	0.46	0.12	0.000942384
GO:0009664	peptide transport	0.54	0.19	0.00447322
GO:0009684	indoleacetic acid biosynthetic process	0.15	0.01	0.00815878
GO:0009698	phenylpropanoid metabolic process	0.97	0.5	0.00717242
GO:0009699	phenylpropanoid biosynthetic process	0.72	0.39	0.045973
GO:0009753	response to jasmonic acid stimulus	0.89	0.43	0.00458158
GO:0009765	photosynthesis, light harvesting	0.49	0.05	9.6313e-08
GO:0009767	photosynthetic electron transport chain	0.46	0.07	8.39718e-06
GO:0009773	photosynthetic electron transport in photosystem I	0.23	0.02	0.00027094
GO:0009808	lignin metabolic process	0.46	0.17	0.00957705
GO:0009809	lignin biosynthetic process	0.33	0.12	0.0315861
GO:0009820	alkaloid metabolic process	0.49	0.15	0.00211536
GO:0009821	alkaloid biosynthetic process	0.15	0.03	0.0343615
GO:0009827	plant-type cell wall modification	0.36	0.11	0.0119758
GO:0009832	plant-type cell wall biogenesis	0.41	0.13	0.0070705
GO:0009834	secondary cell wall biogenesis	0.31	0.02	7.84717e-06
GO:0009850	auxin metabolic process	0.28	0.09	0.0471372
GO:0009851	auxin biosynthetic process	0.2	0.05	0.0315861
GO:0009853	photorespiration	0.36	0.1	0.0065548
GO:0009856	pollination	0.74	0.36	0.0119758
GO:0009932	cell tip growth	0.43	0.18	0.0307552
GO:0010114	response to red light	0.56	0.12	9.41465e-06
GO:0010208	pollen wall assembly	0.28	0.03	6.42144e-05
GO:0010218	response to far red light	0.36	0.1	0.0065548
GO:0010584	pollen exine formation	0.26	0.01	2.58528e-05
GO:0015833	plant-type cell wall organization	0.54	0.21	0.00841044
GO:0015977	carbon fixation	0.31	0.04	0.000107087
GO:0015979	photosynthesis	2.02	0.43	6.86195e-20
GO:0016042	lipid catabolic process	1.4	0.56	5.09789e-06
GO:0016051	carbohydrate biosynthetic process	1.35	0.83	0.0180506
GO:0016052	carbohydrate catabolic process	1.2	0.66	0.0062868
GO:0019253	reductive pentose-phosphate cycle	0.28	0.01	3.57014e-06
GO:0019318	hexose metabolic process	1.02	0.56	0.0119758
GO:0019684	photosynthesis, light reaction	1.05	0.22	3.2554e-10
GO:0019685	photosynthesis, dark reaction	0.28	0.01	6.92085e-06
GO:0019725	cellular homeostasis	1.25	0.66	0.00310717
GO:0019748	secondary metabolic process	2.43	1.25	5.09789e-06
GO:0019752	carboxylic acid metabolic process	3.96	2.42	5.54326e-06
GO:0019760	glucosinolate metabolic process	0.38	0.11	0.00584158
GO:0019915	lipid storage	0.18	0.04	0.0470429
GO:0022900	electron transport chain	1.35	0.55	7.84717e-06
GO:0042493	response to drug	0.64	0.29	0.0119758
GO:0042545	cell redox homeostasis	0.87	0.4	0.00372123
GO:0042546	cell wall biogenesis	0.46	0.2	0.0319536
GO:0042742	defense response to bacterium	1.02	0.5	0.00338537
GO:0044262	cellular carbohydrate metabolic process	2.5	1.52	0.000403068
GO:0045454	cell wall modification	0.87	0.37	0.00115907
GO:0048235	pollen sperm cell differentiation	0.13	0.02	0.0476422
GO:0048438	floral whorl development	0.61	0.28	0.0188105
GO:0048868	pollen tube development	0.51	0.19	0.00767807
GO:0051707	response to other organism	2.4	1.45	0.000514693
GO:0055085	transmembrane transport	1.33	0.74	0.00453029
	cellular component
GO-term ID	Term	Tested_list_percentage	Genome_percentage	adj_pvalue
GO:0005618	cell wall	3.01	1.79	8.92555e-06
GO:0005773	vacuole	2.81	1.94	0.00282289
GO:0005777	peroxisome	0.82	0.44	0.0123472
GO:0005811	lipid particle	0.18	0.04	0.0340892
GO:0009341	beta-galactosidase complex	0.28	0.08	0.00873704
GO:0009505	plant-type cell wall	1.51	0.76	8.03162e-05
GO:0009521	photosystem	0.92	0.13	3.29406e-13
GO:0009522	photosystem I	0.49	0.04	8.80527e-10
GO:0009523	photosystem II	0.56	0.11	1.30489e-06
GO:0009579	thylakoid	4.83	1.06	4.20278e-49
GO:0010598	NAD(P)H dehydrogenase complex (plastoquinone)	0.2	0.01	2.25124e-05
GO:0012511	monolayer-surrounded lipid storage body	0.18	0.04	0.0340892
GO:0016324	apical plasma membrane	0.2	0.01	6.73138e-05
GO:0030076	light-harvesting complex	0.41	0.06	4.14235e-06
GO:0031012	extracellular matrix	0.26	0.07	0.00980302
GO:0031225	anchored to membrane	1.35	0.72	0.000749713
GO:0031977	thylakoid lumen	0.89	0.19	1.92605e-09
GO:0042579	microbody	0.82	0.44	0.0123472
GO:0042651	thylakoid membrane	3.7	0.58	9.26418e-50
GO:0045177	apical part of cell	0.26	0.02	1.78025e-05
GO:0048046	apoplast	3.01	0.92	3.50282e-21
	molecular function
GO-term ID	Term	Tested_list_percentage	Genome_percentage	adj_pvalue
GO:0000293	ferric-chelate reductase activity	0.13	0.01	0.0180672
GO:0003841	1-acylglycerol-3-phosphate O-acyltransferase activity	0.13	0.02	0.0468211
GO:0004089	carbonate dehydratase activity	0.18	0.04	0.0468211
GO:0004091	carboxylesterase activity	2.63	0.94	1.55801e-13
GO:0004366	glycerol-3-phosphate O-acyltransferase activity	0.13	0.01	0.0325737
GO:0004467	long-chain fatty acid-CoA ligase activity	0.13	0.02	0.0468211
GO:0004497	monooxygenase activity	1.89	1.01	0.000115467
GO:0004553	hydrolase activity, hydrolyzing O-glycosyl compounds	2.73	1.27	8.60423e-09
GO:0004565	beta-galactosidase activity	0.36	0.09	0.00513681
GO:0004601	peroxidase activity	0.84	0.33	0.000496127
GO:0004857	enzyme inhibitor activity	1.63	0.53	1.16918e-09
GO:0005275	amine transmembrane transporter activity	0.56	0.22	0.00813476
GO:0005351	sugar:hydrogen symporter activity	0.82	0.27	5.48738e-05
GO:0005506	iron ion binding	3.75	2.1	1.08414e-07
GO:0005509	calcium ion binding	1.92	1.25	0.0120629
GO:0008146	sulfotransferase activity	0.2	0.04	0.0180672
GO:0008266	poly(U) RNA binding	0.2	0.04	0.0180672
GO:0008289	lipid binding	1.81	1.14	0.00831723
GO:0008324	cation transmembrane transporter activity	3.3	1.98	1.65866e-05
GO:0008453	alanine-glyoxylate transaminase activity	0.1	0.01	0.0357459
GO:0008794	arsenate reductase (glutaredoxin) activity	0.18	0.03	0.0118693
GO:0008825	cyclopropane-fatty-acyl-phospholipid synthase activity	0.15	0.03	0.0357459
GO:0009672	auxin:hydrogen symporter activity	0.15	0.03	0.0469377
GO:0015035	protein disulfide oxidoreductase activity	0.43	0.14	0.00561095
GO:0015036	disulfide oxidoreductase activity	0.51	0.16	0.00144699
GO:0015075	ion transmembrane transporter activity	3.86	2.4	1.10513e-05
GO:0015144	carbohydrate transmembrane transporter activity	0.92	0.33	4.46622e-05
GO:0015171	amino acid transmembrane transporter activity	0.49	0.17	0.00561095
GO:0015198	oligopeptide transporter activity	0.2	0.05	0.0336431
GO:0015250	water channel activity	0.31	0.09	0.0183359
GO:0015293	symporter activity	1.56	0.67	4.32613e-06
GO:0015297	antiporter activity	0.92	0.53	0.0387883
GO:0015299	solute:proton antiporter activity	0.49	0.23	0.0468211
GO:0015399	primary active transmembrane transporter activity	1.33	0.82	0.0230861
GO:0016168	chlorophyll binding	0.43	0.04	3.36856e-07
GO:0016207	4-coumarate-CoA ligase activity	0.15	0.03	0.0357459
GO:0016298	lipase activity	0.84	0.42	0.00966814
GO:0016614	oxidoreductase activity, acting on CH-OH group of donors	1.38	0.78	0.00513681
GO:0016616	oxidoreductase activity, acting on the CH-OH group of donors, NAD or NADP as acceptor	1.12	0.69	0.0383168
GO:0016620	oxidoreductase activity, acting on the aldehyde or oxo group of donors, NAD or NADP as acceptor	0.41	0.13	0.00655762
GO:0016667	oxidoreductase activity, acting on a sulfur group of donors	0.66	0.3	0.00981561
GO:0016701	oxidoreductase activity, acting on single donors with incorporation of molecular oxygen	0.54	0.19	0.00425199
GO:0016702	oxidoreductase activity, acting on single donors with incorporation of molecular oxygen, incorporation of two atoms of oxygen	0.41	0.17	0.0468211
GO:0016705	oxidoreductase activity, acting on paired donors, with incorporation or reduction of molecular oxygen	1.2	0.66	0.0065156
GO:0016709	oxidoreductase activity, acting on paired donors, with incorporation or reduction of molecular oxygen, NADH or NADPH as one donor, and incorporation of one atom of oxygen	0.54	0.21	0.00966814
GO:0016746	transferase activity, transferring acyl groups	1.51	0.91	0.00981561
GO:0016747	transferase activity, transferring acyl groups other than amino-acyl groups	1.35	0.83	0.0192223
GO:0016798	hydrolase activity, acting on glycosyl bonds	2.86	1.34	4.85004e-09
GO:0016820	hydrolase activity, acting on acid anhydrides, catalyzing transmembrane movement of substances	1.23	0.66	0.00513681
GO:0016829	lyase activity	2.2	1.13	7.99284e-06
GO:0016830	carbon-carbon lyase activity	0.74	0.35	0.0107951
GO:0016844	strictosidine synthase activity	0.2	0.03	0.00425199
GO:0016853	isomerase activity	1.25	0.8	0.0468211
GO:0016857	racemase and epimerase activity, acting on carbohydrates and derivatives	0.31	0.11	0.0388792
GO:0019825	oxygen binding	1.3	0.66	0.00121077
GO:0020037	heme binding	2.07	1.13	8.9413e-05
GO:0030246	carbohydrate binding	1.12	0.67	0.0284453
GO:0030570	pectate lyase activity	0.28	0.05	0.00396801
GO:0030599	pectinesterase activity	1.3	0.36	2.1252e-09
GO:0030611	arsenate reductase activity	0.18	0.03	0.0180672
GO:0045330	aspartyl esterase activity	0.43	0.18	0.0325737
GO:0046906	tetrapyrrole binding	2.5	1.18	5.38138e-08
GO:0046910	pectinesterase inhibitor activity	0.74	0.13	1.04363e-08
GO:0048037	cofactor binding	3.12	1.7	6.00203e-07
GO:0050660	flavin adenine dinucleotide binding	1.23	0.48	1.10513e-05
GO:0050662	coenzyme binding	2.45	1.18	1.9513e-07
GO:0051119	sugar transmembrane transporter activity	0.84	0.31	0.000135406
GO:0051920	peroxiredoxin activity	0.13	0.02	0.0468211

## Sheet: t0>t2
	biological process
GO-term ID	Term	Tested_list_percentage	Genome_percentage	adj_pvalue
GO:0000160	two-component signal transduction system (phosphorelay)	3.79	0.65	3.50683e-06
GO:0006629	lipid metabolic process	5.8	2.64	0.0054164
GO:0006725	cellular aromatic compound metabolic process	3.79	1.41	0.00742847
GO:0006800	oxygen and reactive oxygen species metabolic process	1.56	0.37	0.0297385
GO:0006820	anion transport	1.56	0.29	0.0106713
GO:0006857	oligopeptide transport	1.56	0.2	0.00218502
GO:0006869	lipid transport	2.23	0.46	0.00233808
GO:0006952	defense response	9.38	2.56	9.08266e-10
GO:0006955	immune response	3.35	1.05	0.00353455
GO:0006970	response to osmotic stress	3.79	1.21	0.00201989
GO:0006979	response to oxidative stress	4.02	0.87	2.39917e-05
GO:0009266	response to temperature stimulus	3.79	1.31	0.00353455
GO:0009314	response to radiation	4.91	1.47	8.88774e-05
GO:0009409	response to cold	3.12	0.94	0.00353455
GO:0009414	response to water deprivation	3.12	0.5	2.29911e-05
GO:0009415	response to water	3.12	0.53	2.72e-05
GO:0009416	response to light stimulus	4.91	1.43	6.36338e-05
GO:0009605	response to external stimulus	3.57	1.17	0.00342329
GO:0009607	response to biotic stimulus	5.58	1.72	4.10339e-05
GO:0009611	response to wounding	2.9	0.51	6.36338e-05
GO:0009617	response to bacterium	3.12	0.73	0.000393911
GO:0009620	response to fungus	2.46	0.37	9.07871e-05
GO:0009631	cold acclimation	1.12	0.05	0.000318556
GO:0009637	response to blue light	1.12	0.15	0.0167368
GO:0009639	response to red or far red light	2.01	0.52	0.014763
GO:0009651	response to salt stress	3.35	1.13	0.00616298
GO:0009698	phenylpropanoid metabolic process	2.01	0.54	0.0181419
GO:0009699	phenylpropanoid biosynthetic process	1.56	0.41	0.0491695
GO:0009718	anthocyanin biosynthetic process	0.89	0.05	0.00353455
GO:0009723	response to ethylene stimulus	3.57	0.77	6.05838e-05
GO:0009725	response to hormone stimulus	9.38	2.82	8.04666e-09
GO:0009737	response to abscisic acid stimulus	3.57	0.89	0.000230197
GO:0009743	response to carbohydrate stimulus	4.46	0.57	2.39199e-09
GO:0009751	response to salicylic acid stimulus	1.79	0.44	0.0201016
GO:0009753	response to jasmonic acid stimulus	2.9	0.45	2.83121e-05
GO:0009755	hormone-mediated signaling pathway	4.46	1.39	0.000355081
GO:0009807	lignan biosynthetic process	0.67	0.04	0.0234731
GO:0009814	defense response, incompatible interaction	1.34	0.29	0.0360925
GO:0009873	ethylene mediated signaling pathway	2.9	0.51	6.36338e-05
GO:0009910	negative regulation of flower development	0.89	0.1	0.0230427
GO:0010023	proanthocyanidin biosynthetic process	0.45	0.01	0.0310684
GO:0010114	response to red light	1.34	0.16	0.00342329
GO:0010200	response to chitin	4.24	0.35	2.48695e-11
GO:0010218	response to far red light	1.12	0.12	0.00742847
GO:0015833	peptide transport	1.56	0.22	0.00280001
GO:0016042	lipid catabolic process	2.23	0.65	0.017841
GO:0018298	protein-chromophore linkage	0.89	0.07	0.0116832
GO:0019748	secondary metabolic process	4.69	1.36	8.88774e-05
GO:0031347	regulation of defense response	1.12	0.16	0.0201016
GO:0042398	cellular modified amino acid biosynthetic process	2.23	0.62	0.0139509
GO:0042493	response to drug	1.56	0.31	0.014763
GO:0042742	defense response to bacterium	2.68	0.54	0.000398202
GO:0042744	hydrogen peroxide catabolic process	1.34	0.25	0.0226898
GO:0045087	innate immune response	3.12	0.9	0.00279386
GO:0046283	anthocyanin metabolic process	0.89	0.07	0.0105688
GO:0050832	defense response to fungus	2.23	0.25	3.90614e-05
GO:0051707	response to other organism	5.36	1.52	2.68241e-05
GO:0080028	nitrile biosynthetic process	0.45	0.01	0.0310684
	cellular component
GO-term ID	Term	Tested_list_percentage	Genome_percentage	adj_pvalue
GO:0005618	cell wall	6.47	1.88	2.60733e-06
GO:0009505	plant-type cell wall	3.57	0.82	8.35998e-05
GO:0048046	apoplast	4.24	1.14	8.35998e-05
	molecular function
GO-term ID	Term	Tested_list_percentage	Genome_percentage	adj_pvalue
GO:0004091	carboxylesterase activity	4.02	1.11	0.00130069
GO:0004185	serine-type carboxypeptidase activity	1.34	0.21	0.0336287
GO:0004553	hydrolase activity, hydrolyzing O-glycosyl compounds	4.46	1.42	0.00206161
GO:0004601	peroxidase activity	1.79	0.38	0.0270652
GO:0005506	iron ion binding	6.7	2.25	0.000178471
GO:0005529	sugar binding	1.79	0.38	0.0270652
GO:0016168	chlorophyll binding	0.89	0.08	0.0366756
GO:0016563	transcription activator activity	2.01	0.44	0.0186099
GO:0016701	oxidoreductase activity, acting on single donors with incorporation of molecular oxygen	1.34	0.22	0.0336287
GO:0016798	hydrolase activity, acting on glycosyl bonds	4.46	1.49	0.0033282
GO:0020037	heme binding	3.57	1.21	0.0158959
GO:0046906	tetrapyrrole binding	4.46	1.3	0.00123317
GO:0080030	methyl indole-3-acetate esterase activity	0.67	0.02	0.015307
GO:0080032	methyl jasmonate esterase activity	0.67	0.01	0.00651588

## Sheet: t0<t2
	biological process
GO-term ID	Term	Tested_list_percentage	Genome_percentage	adj_pvalue
GO:0006629	lipid metabolic process	7.17	2.65	0.0055661
GO:0006949	syncytium formation	0.8	0.03	0.0465266
GO:0007242	intracellular signaling cascade	7.17	3.14	0.0269918
GO:0007389	pattern specification process	3.59	0.34	3.61373e-05
GO:0008356	asymmetric cell division	0.8	0.02	0.0330746
GO:0009267	cellular response to starvation	1.59	0.18	0.0277938
GO:0009314	response to radiation	5.58	1.49	0.00129439
GO:0009416	response to light stimulus	5.58	1.44	0.00100037
GO:0009605	response to external stimulus	4.38	1.18	0.00758111
GO:0009639	response to red or far red light	3.19	0.52	0.00236873
GO:0009653	anatomical structure morphogenesis	6.37	1.5	0.000148484
GO:0009725	response to hormone stimulus	9.96	2.85	1.84157e-05
GO:0009734	auxin mediated signaling pathway	1.99	0.36	0.0445465
GO:0009737	response to abscisic acid stimulus	3.19	0.91	0.0445465
GO:0009739	response to gibberellin stimulus	3.59	0.36	5.03241e-05
GO:0009740	gibberellic acid mediated signaling pathway	2.39	0.09	3.61373e-05
GO:0009755	hormone-mediated signaling pathway	5.98	1.4	0.000246577
GO:0009791	post-embryonic development	11.95	2.8	2.25005e-08
GO:0009827	plant-type cell wall modification	1.59	0.13	0.0131366
GO:0009828	plant-type cell wall loosening	1.59	0.1	0.00564404
GO:0009887	organ morphogenesis	3.59	0.51	0.000452614
GO:0009908	flower development	7.17	0.87	2.21957e-08
GO:0009942	longitudinal axis specification	1.2	0.05	0.0143771
GO:0009965	leaf morphogenesis	1.99	0.3	0.0277618
GO:0010014	meristem initiation	0.8	0.02	0.0330746
GO:0010016	shoot morphogenesis	3.59	0.42	0.000148484
GO:0010114	response to red light	1.59	0.16	0.0226272
GO:0010187	negative regulation of seed germination	0.8	0.02	0.0330746
GO:0010374	stomatal complex development	1.2	0.07	0.0226272
GO:0010476	gibberellin mediated signaling pathway	2.39	0.09	3.61373e-05
GO:0016036	cellular response to phosphate starvation	1.2	0.1	0.0465266
GO:0016042	lipid catabolic process	2.79	0.65	0.0326142
GO:0019748	secondary metabolic process	4.78	1.38	0.00758111
GO:0022621	shoot system development	4.38	0.85	0.00069859
GO:0030154	cell differentiation	6.37	0.95	1.20785e-06
GO:0042547	cell wall modification involved in multidimensional cell growth	1.2	0.08	0.030023
GO:0042594	response to starvation	1.59	0.2	0.034741
GO:0046685	response to arsenic-containing substance	1.2	0.02	0.00150784
GO:0048364	root development	2.79	0.57	0.0191974
GO:0048366	leaf development	2.39	0.53	0.0465266
GO:0048367	shoot development	4.38	0.84	0.000664419
GO:0048437	floral organ development	3.19	0.35	0.000287831
GO:0048438	floral whorl development	2.79	0.31	0.000791856
GO:0048440	carpel development	2.39	0.14	0.000177095
GO:0048444	floral organ morphogenesis	1.2	0.08	0.0277938
GO:0048467	gynoecium development	2.79	0.15	3.61373e-05
GO:0048507	meristem development	2.39	0.34	0.00821407
GO:0048513	organ development	9.16	1.92	4.05984e-07
GO:0048569	post-embryonic organ development	3.19	0.36	0.000287831
GO:0048645	organ formation	1.99	0.09	0.000287831
GO:0048827	phyllome development	2.79	0.6	0.0226272
GO:0051301	cell division	2.79	0.56	0.0173766
	molecular function
GO-term ID	Term	Tested_list_percentage	Genome_percentage	adj_pvalue
GO:0043565	sequence-specific DNA binding	7.97	1.59	5.52757e-06
