# Supplementary material
Source: MDPI journal article supplement (https://www.mdpi.com/2075-4655/1/2/8)
Supplement: s1 [file s1 › Supplementary/Tables-S1to6/Table_S3.xls]

## Sheet: reads and corr
Mapped reads (after removal of duplicates)								Pearson product-moment correlation coefficient
#K4me3	Repl. 1	Repl. 2	Input Repl. 1					WindowSize=200
L	7.72637	29.8733
I	10.0989	34.0034	27.7034							Rep1-Rep2		Rep1-Input1		Rep2-Input2
t0	12.5886	27.5686								K4me3	K27me3	K4me3	K27me3	K4me3	K27me3
t2	17.2433	32.9276	27.0949						L	0.899472	0.849584	0.129862	0.0430812	0.208635	0.0930924	Input I
									I	0.898011	0.75911	0.173229	0.165185	0.422063	0.146967
									t0	0.943835	0.960193	0.152797	0.0832767	0.184583	0.116487	Input t2
									t2	0.96766	0.954573	0.140892	0.0653983	0.306723	0.0945343
#K27me3	Repl. 1	Repl. 2	Input Repl. 2
L	7.07134	24.7897
I	5.86902	26.4855	26.6589
t0	14.2358	22.1853
t2	14.8179	18.4871	30.3291
								Average expression values among targets in the respective tissue (FPKM)
										L	I	t0	t2
									K4me3	63.9672	47.8592	50.6683	49.3246
									K27me3	25.7717	16.5286	9.79508	8.64051
									all genes	37.7906	27.3152	26.5781	25.7805

## Sheet: targets summary
	H3K27me3									H3K4me3
		Repl. 1	Repl. 2	overlap	% Repl. 1	% Repl. 2				Repl. 1	Repl. 2	overlap	% Repl. 1	% Repl. 2
	L	7900	9071	7026	88.9367	77.4556			L	16453	18292	16123	97.9943	88.1424
	I	8035	9399	7464	92.8936	79.4127			I	17144	17662	16621	96.9494	94.106
	t0	8467	9165	8273	97.7088	90.2673			t0	17116	18200	17040	99.556	93.6264
	t2	8563	9020	8283	96.7301	91.8293			t2	17226	17732	17088	99.1989	96.3681
	Targets in both replicates:									Targets in both replicates:
		L	I	t0	t2					L	I	t0	t2
	L	7026							L	16123
	I	6427	7464						I	15456	16621
	t0	6387	7042	8273					t0	15298	16157	17040
	t2	6395	7045	8081	8283				t2	15313	16169	16796	17088
	Comparison to published data sets									Comparison to published data sets
		ChIP-chip		ChIP-seq		ChIP-chip					ChIP-seq		ChIP-chip
		seedlings 10 days, LD		aerial material 2 wks continous light		seedlings 10 days					aerial material 2 wks continous light		seedlings 10 days
		Overlap with Farrona et al. (7245)	% overlap	Overlap with Luo et al. (6309)	% overlap	Overlap with Roudier et al. (9433)	% overlap				Overlap with Luo et al. (14205)	% overlap	Overlap with Roudier et al. (17861)	% overlap
L	7026	5928	81.8219	5559	88.1122	6251	66.2674		L	16123	13827	97.339	15453	86.5181
I	7464	6191	85.452	5690	90.1886	6676	70.7728		I	16621	13714	96.5435	15783	88.3657
t0	8273	6240	86.1284	5631	89.2534	6919	73.3489		t0	17040	13608	95.7973	15865	88.8248
t2	8283	6258	86.3768	5629	89.2217	6901	73.1581		t2	17088	13617	95.8606	15886	88.9424

## Sheet: L K4
AT1G01010
AT1G01020
AT1G01040
AT1G01050
AT1G01060
AT1G01080
AT1G01090
AT1G01100
AT1G01120
AT1G01130
AT1G01140
AT1G01160
AT1G01170
AT1G01180
AT1G01210
AT1G01220
AT1G01225
AT1G01230
AT1G01240
AT1G01250
AT1G01260
AT1G01290
AT1G01300
AT1G01320
AT1G01340
AT1G01350
AT1G01360
AT1G01390
AT1G01420
AT1G01430
AT1G01440
AT1G01448
AT1G01470
AT1G01490
AT1G01500
AT1G01510
AT1G01540
AT1G01550
AT1G01560
AT1G01570
AT1G01600
AT1G01610
AT1G01620
AT1G01630
AT1G01650
AT1G01670
AT1G01690
AT1G01710
AT1G01720
AT1G01725
AT1G01730
AT1G01740
AT1G01760
AT1G01770
AT1G01790
AT1G01800
AT1G01810
AT1G01820
AT1G01830
AT1G01840
AT1G01860
AT1G01870
AT1G01880
AT1G01910
AT1G01920
AT1G01930
AT1G01940
AT1G01950
AT1G01960
AT1G01970
AT1G01990
AT1G02000
AT1G02010
AT1G02020
AT1G02060
AT1G02080
AT1G02090
AT1G02100
AT1G02120
AT1G02110
AT1G02130
AT1G02140
AT1G02145
AT1G02150
AT1G02160
AT1G02170
AT1G02180
AT1G02220
AT1G02230
AT1G02260
AT1G02270
AT1G02280
AT1G02290
AT1G02300
AT1G02305
AT1G02330
AT1G02340
AT1G02350
AT1G02370
AT1G02380
AT1G02390
AT1G02400
AT1G02410
AT1G02420
AT1G02450
AT1G02470
AT1G02475
AT1G02500
AT1G02560
AT1G02610
AT1G02620
AT1G02640
AT1G02650
AT1G02660
AT1G02680
AT1G02690
AT1G02720
AT1G02740
AT1G02750
AT1G02780
AT1G02816
AT1G02840
AT1G02850
AT1G02860
AT1G02870
AT1G02880
AT1G02890
AT1G02910
AT1G02920
AT1G02930
AT1G02960
AT1G02970
AT1G02990
AT1G03000
AT1G03030
AT1G03040
AT1G03060
AT1G03080
AT1G03090
AT1G03100
AT1G03110
AT1G03120
AT1G03140
AT1G03150
AT1G03130
AT1G03160
AT1G03180
AT1G03190
AT1G03200
AT1G03210
AT1G03220
AT1G03230
AT1G03250
AT1G03260
AT1G03270
AT1G03280
AT1G03290
AT1G03300
AT1G03310
AT1G03340
AT1G03330
AT1G03350
AT1G03360
AT1G03365
AT1G03370
AT1G03380
AT1G03400
AT1G03410
AT1G03420
AT1G03430
AT1G03440
AT1G03457
AT1G03475
AT1G03502
AT1G03506
AT1G03510
AT1G03520
AT1G03530
AT1G03540
AT1G03560
AT1G03570
AT1G03590
AT1G03600
AT1G03610
AT1G03630
AT1G03650
AT1G03687
AT1G03680
AT1G03730
AT1G03740
AT1G03743
AT1G03746
AT1G03750
AT1G03760
AT1G03830
AT1G03850
AT1G03860
AT1G03870
AT1G03890
AT1G03900
AT1G03905
AT1G03910
AT1G03930
AT1G03935
AT1G03950
AT1G03960
AT1G03970
AT1G03980
AT1G03990
AT1G04000
AT1G04010
AT1G04030
AT1G04040
AT1G04050
AT1G04070
AT1G04080
AT1G04090
AT1G04100
AT1G04120
AT1G04130
AT1G04140
AT1G04160
AT1G04170
AT1G04190
AT1G04200
AT1G04210
AT1G04230
AT1G04240
AT1G04260
AT1G04270
AT1G04280
AT1G04290
AT1G04295
AT1G04300
AT1G04310
AT1G04350
AT1G04340
AT1G04360
AT1G04390
AT1G04400
AT1G04410
AT1G04420
AT1G04430
AT1G04440
AT1G04480
AT1G04510
AT1G04520
AT1G04530
AT1G04540
AT1G04550
AT1G04555
AT1G04570
AT1G04590
AT1G04600
AT1G04620
AT1G04630
AT1G04635
AT1G04640
AT1G04680
AT1G04690
AT1G04710
AT1G04730
AT1G04750
AT1G04760
AT1G04770
AT1G04780
AT1G04790
AT1G04810
AT1G04820
AT1G04830
AT1G04840
AT1G04850
AT1G04860
AT1G04870
AT1G04900
AT1G04910
AT1G04930
AT1G04940
AT1G04945
AT1G04950
AT1G04970
AT1G04960
AT1G04980
AT1G04985
AT1G04990
AT1G05000
AT1G05010
AT1G05020
AT1G05030
AT1G05055
AT1G05060
AT1G05065
AT1G05070
AT1G05090
AT1G05100
AT1G05120
AT1G05140
AT1G05150
AT1G05160
AT1G05170
AT1G05180
AT1G05190
AT1G05200
AT1G05205
AT1G05210
AT1G05230
AT1G05270
AT1G05300
AT1G05350
AT1G05360
AT1G05370
AT1G05380
AT1G05385
AT1G05390
AT1G05410
AT1G05430
AT1G05460
AT1G05470
AT1G05500
AT1G05520
AT1G05540
AT1G05560
AT1G05562
AT1G05570
AT1G05575
AT1G05590
AT1G05600
AT1G05620
AT1G05630
AT1G05640
AT1G05670
AT1G05675
AT1G05690
AT1G05710
AT1G05720
AT1G05730
AT1G05750
AT1G05780
AT1G05785
AT1G05790
AT1G05805
AT1G05810
AT1G05830
AT1G05840
AT1G05850
AT1G05860
AT1G05870
AT1G05890
AT1G05900
AT1G05910
AT1G05940
AT1G05950
AT1G05960
AT1G05970
AT1G06000
AT1G06002
AT1G06010
AT1G06040
AT1G06050
AT1G06060
AT1G06070
AT1G06110
AT1G06130
AT1G06140
AT1G06149
AT1G06150
AT1G06160
AT1G06190
AT1G06200
AT1G06210
AT1G06220
AT1G06230
AT1G06240
AT1G06270
AT1G06290
AT1G06380
AT1G06390
AT1G06400
AT1G06410
AT1G06430
AT1G06450
AT1G06460
AT1G06470
AT1G06500
AT1G06490
AT1G06510
AT1G06515
AT1G06530
AT1G06550
AT1G06560
AT1G06570
AT1G06580
AT1G06590
AT1G06630
AT1G06640
AT1G06645
AT1G06650
AT1G06670
AT1G06690
AT1G06680
AT1G06700
AT1G06710
AT1G06730
AT1G06720
AT1G06740
AT1G06750
AT1G06760
AT1G06770
AT1G06780
AT1G06790
AT1G06800
AT1G06820
AT1G06840
AT1G06850
AT1G06870
AT1G06890
AT1G06900
AT1G06910
AT1G06950
AT1G06960
AT1G06980
AT1G07000
AT1G07010
AT1G07020
AT1G07030
AT1G07040
AT1G07050
AT1G07070
AT1G07080
AT1G07090
AT1G07119
AT1G07120
AT1G07110
AT1G07128
AT1G07130
AT1G07135
AT1G07140
AT1G07150
AT1G07160
AT1G07170
AT1G07180
AT1G07200
AT1G07210
AT1G07220
AT1G07230
AT1G07240
AT1G07250
AT1G07260
AT1G07270
AT1G07280
AT1G07290
AT1G07310
AT1G07320
AT1G07350
AT1G07370
AT1G07360
AT1G07390
AT1G07400
AT1G07410
AT1G07420
AT1G07430
AT1G07440
AT1G07470
AT1G07480
AT1G07485
AT1G07490
AT1G07510
AT1G07520
AT1G07530
AT1G07570
AT1G07590
AT1G07600
AT1G07620
AT1G07615
AT1G07630
AT1G07650
AT1G07660
AT1G07670
AT1G07700
AT1G07705
AT1G07720
AT1G07725
AT1G07728
AT1G07740
AT1G07745
AT1G07750
AT1G07770
AT1G07780
AT1G07790
AT1G07810
AT1G07820
AT1G07830
AT1G07840
AT1G07870
AT1G07890
AT1G07901
AT1G07910
AT1G07920
AT1G07930
AT1G07940
AT1G07950
AT1G07960
AT1G07970
AT1G07980
AT1G07990
AT1G08000
AT1G08010
AT1G08030
AT1G08040
AT1G08050
AT1G08060
AT1G08070
AT1G08110
AT1G08125
AT1G08130
AT1G08180
AT1G08190
AT1G08200
AT1G08210
AT1G08220
AT1G08230
AT1G08250
AT1G08260
AT1G08270
AT1G08280
AT1G08300
AT1G08310
AT1G08315
AT1G08350
AT1G08360
AT1G08370
AT1G08380
AT1G08390
AT1G08400
AT1G08410
AT1G08420
AT1G08460
AT1G08450
AT1G08465
AT1G08470
AT1G08480
AT1G08490
AT1G08510
AT1G08520
AT1G08530
AT1G08540
AT1G08550
AT1G08570
AT1G08580
AT1G08590
AT1G08592
AT1G08600
AT1G08610
AT1G08620
AT1G08640
AT1G08650
AT1G08660
AT1G08680
AT1G08700
AT1G08710
AT1G08720
AT1G08750
AT1G08760
AT1G08770
AT1G08780
AT1G08800
AT1G08820
AT1G08830
AT1G08845
AT1G08840
AT1G08870
AT1G08880
AT1G08890
AT1G08900
AT1G08910
AT1G08920
AT1G08930
AT1G08940
AT1G08960
AT1G08970
AT1G08980
AT1G09010
AT1G09020
AT1G09040
AT1G09060
AT1G09070
AT1G09080
AT1G09100
AT1G09130
AT1G09140
AT1G09150
AT1G09160
AT1G09180
AT1G09190
AT1G09195
AT1G09200
AT1G09210
AT1G09230
AT1G09250
AT1G09270
AT1G09280
AT1G09290
AT1G09300
AT1G09310
AT1G09320
AT1G09340
AT1G09330
AT1G09350
AT1G09415
AT1G09420
AT1G09421
AT1G09430
AT1G09440
AT1G09490
AT1G09520
AT1G09530
AT1G09560
AT1G09570
AT1G09575
AT1G09580
AT1G09590
AT1G09620
AT1G09630
AT1G09640
AT1G09645
AT1G09660
AT1G09680
AT1G09690
AT1G09700
AT1G09710
AT1G09730
AT1G09740
AT1G09750
AT1G09760
AT1G09770
AT1G09780
AT1G09794
AT1G09795
AT1G09800
AT1G09810
AT1G09815
AT1G09820
AT1G09830
AT1G09840
AT1G09850
AT1G09870
AT1G09900
AT1G09910
AT1G09920
AT1G09940
AT1G09950
AT1G09960
AT1G09970
AT1G09980
AT1G10020
AT1G10030
AT1G10050
AT1G10040
AT1G10090
AT1G10095
AT1G10100
AT1G10120
AT1G10130
AT1G10140
AT1G10150
AT1G10170
AT1G10180
AT1G10200
AT1G10210
AT1G10230
AT1G10240
AT1G10270
AT1G10280
AT1G10290
AT1G10310
AT1G10320
AT1G10330
AT1G10340
AT1G10350
AT1G10360
AT1G10370
AT1G10390
AT1G10410
AT1G10417
AT1G10430
AT1G10450
AT1G10460
AT1G10470
AT1G10490
AT1G10500
AT1G10510
AT1G10522
AT1G10560
AT1G10570
AT1G10580
AT1G10590
AT1G10600
AT1G10630
AT1G10650
AT1G10657
AT1G10660
AT1G10670
AT1G10690
AT1G10700
AT1G10720
AT1G10730
AT1G10740
AT1G10760
AT1G10820
AT1G10830
AT1G10840
AT1G10850
AT1G10865
AT1G10870
AT1G10890
AT1G10900
AT1G10910
AT1G10920
AT1G10930
AT1G10940
AT1G10950
AT1G10960
AT1G10970
AT1G11000
AT1G11010
AT1G11020
AT1G11050
AT1G11060
AT1G11090
AT1G11120
AT1G11125
AT1G11130
AT1G11175
AT1G11180
AT1G11200
AT1G11210
AT1G11240
AT1G11260
AT1G11280
AT1G11290
AT1G11300
AT1G11310
AT1G11320
AT1G11330
AT1G11340
AT1G11350
AT1G11360
AT1G11380
AT1G11390
AT1G11400
AT1G11410
AT1G11430
AT1G11440
AT1G11475
AT1G11480
AT1G11530
AT1G11545
AT1G11592
AT1G11630
AT1G11640
AT1G11650
AT1G11660
AT1G11680
AT1G11700
AT1G11710
AT1G11720
AT1G11750
AT1G11755
AT1G11760
AT1G11780
AT1G11785
AT1G11790
AT1G11800
AT1G11820
AT1G11840
AT1G11860
AT1G11870
AT1G11880
AT1G11890
AT1G11905
AT1G11900
AT1G11910
AT1G11930
AT1G11940
AT1G11950
AT1G11960
AT1G12000
AT1G12013
AT1G12015
AT1G12020
AT1G12050
AT1G12060
AT1G12090
AT1G12110
AT1G12120
AT1G12140
AT1G12230
AT1G12240
AT1G12244
AT1G12250
AT1G12270
AT1G12280
AT1G12290
AT1G12294
AT1G12300
AT1G12310
AT1G12320
AT1G12330
AT1G12340
AT1G12350
AT1G12360
AT1G12370
AT1G12380
AT1G12390
AT1G12400
AT1G12410
AT1G12420
AT1G12430
AT1G12440
AT1G12450
AT1G12460
AT1G12470
AT1G12500
AT1G12520
AT1G12530
AT1G12550
AT1G12580
AT1G12620
AT1G12640
AT1G12650
AT1G12680
AT1G12700
AT1G12710
AT1G12730
AT1G12750
AT1G12760
AT1G12770
AT1G12775
AT1G12780
AT1G12790
AT1G12800
AT1G12810
AT1G12820
AT1G12840
AT1G12830
AT1G12845
AT1G12850
AT1G12860
AT1G12900
AT1G12910
AT1G12920
AT1G12930
AT1G12970
AT1G12990
AT1G13000
AT1G13020
AT1G13030
AT1G13040
AT1G13060
AT1G13080
AT1G13090
AT1G13100
AT1G13110
AT1G13120
AT1G13140
AT1G13160
AT1G13170
AT1G13180
AT1G13190
AT1G13195
AT1G13210
AT1G13220
AT1G13245
AT1G13250
AT1G13260
AT1G13270
AT1G13280
AT1G13320
AT1G13330
AT1G13350
AT1G13360
AT1G13380
AT1G13390
AT1G13410
AT1G13440
AT1G13450
AT1G13460
AT1G13470
AT1G13560
AT1G13570
AT1G13580
AT1G13630
AT1G13640
AT1G13690
AT1G13730
AT1G13740
AT1G13750
AT1G13770
AT1G13780
AT1G13800
AT1G13810
AT1G13820
AT1G13860
AT1G13870
AT1G13880
AT1G13900
AT1G13910
AT1G13920
AT1G13930
AT1G13940
AT1G13950
AT1G13960
AT1G13980
AT1G13990
AT1G14000
AT1G14010
AT1G14020
AT1G14030
AT1G14060
AT1G14070
AT1G14071
AT1G14130
AT1G14140
AT1G14150
AT1G14170
AT1G14180
AT1G14190
AT1G14200
AT1G14205
AT1G14230
AT1G14270
AT1G14280
AT1G14290
AT1G14310
AT1G14300
AT1G14320
AT1G14330
AT1G14345
AT1G14340
AT1G14350
AT1G14360
AT1G14370
AT1G14380
AT1G14400
AT1G14410
AT1G14430
AT1G14450
AT1G14460
AT1G14470
AT1G14490
AT1G14510
AT1G14520
AT1G14530
AT1G14560
AT1G14570
AT1G14580
AT1G14590
AT1G14600
AT1G14610
AT1G14620
AT1G14640
AT1G14650
AT1G14660
AT1G14670
AT1G14680
AT1G14685
AT1G14687
AT1G14690
AT1G14710
AT1G14720
AT1G14740
AT1G14750
AT1G14770
AT1G14790
AT1G14810
AT1G14820
AT1G14830
AT1G14840
AT1G14850
AT1G14880
AT1G14900
AT1G14910
AT1G14920
AT1G14970
AT1G14980
AT1G14990
AT1G15000
AT1G15002
AT1G15020
AT1G15030
AT1G15060
AT1G15080
AT1G15100
AT1G15110
AT1G15120
AT1G15125
AT1G15130
AT1G15140
AT1G15165
AT1G15170
AT1G15175
AT1G15180
AT1G15190
AT1G15200
AT1G15215
AT1G15220
AT1G15240
AT1G15230
AT1G15250
AT1G15260
AT1G15270
AT1G15280
AT1G15290
AT1G15300
AT1G15310
AT1G15340
AT1G15350
AT1G15370
AT1G15390
AT1G15400
AT1G15405
AT1G15410
AT1G15420
AT1G15430
AT1G15440
AT1G15470
AT1G15490
AT1G15500
AT1G15510
AT1G15520
AT1G15530
AT1G15550
AT1G15570
AT1G15660
AT1G15670
AT1G15690
AT1G15700
AT1G15710
AT1G15720
AT1G15730
AT1G15740
AT1G15750
AT1G15780
AT1G15790
AT1G15800
AT1G15810
AT1G15820
AT1G15825
AT1G15830
AT1G15860
AT1G15880
AT1G15900
AT1G15910
AT1G15920
AT1G15930
AT1G15940
AT1G15950
AT1G15980
AT1G15970
AT1G16000
AT1G16010
AT1G16020
AT1G16030
AT1G16040
AT1G16060
AT1G16080
AT1G16110
AT1G16130
AT1G16170
AT1G16180
AT1G16190
AT1G16210
AT1G16240
AT1G16250
AT1G16260
AT1G16270
AT1G16280
AT1G16300
AT1G16320
AT1G16340
AT1G16350
AT1G16430
AT1G16445
AT1G16470
AT1G16460
AT1G16480
AT1G16489
AT1G16490
AT1G16500
AT1G16510
AT1G16515
AT1G16520
AT1G16540
AT1G16560
AT1G16570
AT1G16590
AT1G16610
AT1G16635
AT1G16640
AT1G16650
AT1G16670
AT1G16680
AT1G16690
AT1G16700
AT1G16710
AT1G16720
AT1G16730
AT1G16740
AT1G16750
AT1G16770
AT1G16780
AT1G16790
AT1G16810
AT1G16800
AT1G16820
AT1G16825
AT1G16830
AT1G16840
AT1G16850
AT1G16858
AT1G16860
AT1G16870
AT1G16880
AT1G16890
AT1G16900
AT1G16916
AT1G16920
AT1G16930
AT1G16970
AT1G17040
AT1G17050
AT1G17070
AT1G17080
AT1G17090
AT1G17100
AT1G17110
AT1G17120
AT1G17130
AT1G17140
AT1G17145
AT1G17147
AT1G17160
AT1G17170
AT1G17200
AT1G17220
AT1G17210
AT1G17230
AT1G17235
AT1G17240
AT1G17255
AT1G17250
AT1G17270
AT1G17280
AT1G17290
AT1G17330
AT1G17340
AT1G17350
AT1G17360
AT1G17370
AT1G17380
AT1G17410
AT1G17420
AT1G17430
AT1G17440
AT1G17455
AT1G17450
AT1G17460
AT1G17470
AT1G17480
AT1G17490
AT1G17500
AT1G17510
AT1G17520
AT1G17530
AT1G17550
AT1G17580
AT1G17600
AT1G17610
AT1G17620
AT1G17630
AT1G17640
AT1G17650
AT1G17665
AT1G17670
AT1G17680
AT1G17690
AT1G17720
AT1G17730
AT1G17744
AT1G17745
AT1G17750
AT1G17760
AT1G17780
AT1G17790
AT1G17820
AT1G17840
AT1G17850
AT1G17860
AT1G17870
AT1G17880
AT1G17890
AT1G17920
AT1G17930
AT1G17940
AT1G17970
AT1G17980
AT1G17990
AT1G18000
AT1G18010
AT1G18020
AT1G18030
AT1G18040
AT1G18060
AT1G18070
AT1G18075
AT1G18080
AT1G18090
AT1G18140
AT1G18150
AT1G18160
AT1G18170
AT1G18190
AT1G18210
AT1G18260
AT1G18265
AT1G18270
AT1G18300
AT1G18320
AT1G18330
AT1G18335
AT1G18340
AT1G18360
AT1G18382
AT1G18390
AT1G18400
AT1G18415
AT1G18420
AT1G18430
AT1G18440
AT1G18450
AT1G18460
AT1G18470
AT1G18480
AT1G18485
AT1G18490
AT1G18500
AT1G18540
AT1G18550
AT1G18560
AT1G18570
AT1G18580
AT1G18590
AT1G18600
AT1G18610
AT1G18620
AT1G18630
AT1G18640
AT1G18650
AT1G18660
AT1G18670
AT1G18680
AT1G18690
AT1G18700
AT1G18710
AT1G18720
AT1G18730
AT1G18740
AT1G18745
AT1G18750
AT1G18773
AT1G18800
AT1G18810
AT1G18840
AT1G18850
AT1G18890
AT1G18900
AT1G18910
AT1G18940
AT1G18950
AT1G19000
AT1G19010
AT1G19020
AT1G19025
AT1G19050
AT1G19070
AT1G19080
AT1G19100
AT1G19110
AT1G19120
AT1G19130
AT1G19140
AT1G19150
AT1G19170
AT1G19180
AT1G19190
AT1G19200
AT1G19210
AT1G19220
AT1G19240
AT1G19250
AT1G19270
AT1G19290
AT1G19300
AT1G19310
AT1G19330
AT1G19340
AT1G19350
AT1G19360
AT1G19370
AT1G19373
AT1G19376
AT1G19380
AT1G19394
AT1G19396
AT1G19400
AT1G19430
AT1G19440
AT1G19450
AT1G19480
AT1G19485
AT1G19490
AT1G19520
AT1G19570
AT1G19580
AT1G19600
AT1G19650
AT1G19660
AT1G19670
AT1G19680
AT1G19690
AT1G19700
AT1G19710
AT1G19720
AT1G19730
AT1G19740
AT1G19770
AT1G19780
AT1G19800
AT1G19835
AT1G19840
AT1G19860
AT1G19870
AT1G19880
AT1G19910
AT1G19920
AT1G19950
AT1G19960
AT1G19970
AT1G19980
AT1G19990
AT1G20010
AT1G20015
AT1G20020
AT1G20030
AT1G20050
AT1G20070
AT1G20090
AT1G20100
AT1G20110
AT1G20140
AT1G20190
AT1G20200
AT1G20220
AT1G20225
AT1G20230
AT1G20260
AT1G20270
AT1G20300
AT1G20290
AT1G20310
AT1G20330
AT1G20340
AT1G20350
AT1G20370
AT1G20380
AT1G20410
AT1G20420
AT1G20430
AT1G20440
AT1G20450
AT1G20460
AT1G20480
AT1G20490
AT1G20510
AT1G20515
AT1G20540
AT1G20550
AT1G20560
AT1G20580
AT1G20575
AT1G20630
AT1G20620
AT1G20640
AT1G20650
AT1G20670
AT1G20693
AT1G20690
AT1G20691
AT1G20696
AT1G20760
AT1G20770
AT1G20780
AT1G20810
AT1G20816
AT1G20823
AT1G20820
AT1G20830
AT1G20840
AT1G20875
AT1G20880
AT1G20890
AT1G20910
AT1G20920
AT1G20950
AT1G20960
AT1G20970
AT1G20980
AT1G21000
AT1G21010
AT1G21050
AT1G21060
AT1G21065
AT1G21070
AT1G21080
AT1G21090
AT1G21130
AT1G21150
AT1G21160
AT1G21170
AT1G21190
AT1G21200
AT1G21250
AT1G21260
AT1G21270
AT1G21280
AT1G21281
AT1G21320
AT1G21326
AT1G21350
AT1G21370
AT1G21380
AT1G21390
AT1G21400
AT1G21410
AT1G21440
AT1G21450
AT1G21460
AT1G21480
AT1G21500
AT1G21520
AT1G21560
AT1G21580
AT1G21590
AT1G21600
AT1G21610
AT1G21630
AT1G21640
AT1G21650
AT1G21651
AT1G21660
AT1G21670
AT1G21680
AT1G21690
AT1G21695
AT1G21700
AT1G21710
AT1G21720
AT1G21730
AT1G21740
AT1G21750
AT1G21760
AT1G21770
AT1G21780
AT1G21790
AT1G21830
AT1G21840
AT1G21880
AT1G21900
AT1G21910
AT1G21920
AT1G21930
AT1G21980
AT1G22020
AT1G22030
AT1G22040
AT1G22050
AT1G22060
AT1G22070
AT1G22110
AT1G22140
AT1G22160
AT1G22180
AT1G22190
AT1G22200
AT1G22220
AT1G22250
AT1G22260
AT1G22270
AT1G22280
AT1G22300
AT1G22310
AT1G22330
AT1G22360
AT1G22370
AT1G22380
AT1G22400
AT1G22403
AT1G22410
AT1G22430
AT1G22450
AT1G22490
AT1G22500
AT1G22510
AT1G22520
AT1G22530
AT1G22540
AT1G22570
AT1G22590
AT1G22610
AT1G22620
AT1G22630
AT1G22640
AT1G22650
AT1G22660
AT1G22700
AT1G22710
AT1G22730
AT1G22740
AT1G22750
AT1G22770
AT1G22780
AT1G22790
AT1G22800
AT1G22830
AT1G22840
AT1G22850
AT1G22860
AT1G22870
AT1G22880
AT1G22882
AT1G22910
AT1G22920
AT1G22930
AT1G22940
AT1G22950
AT1G22960
AT1G22970
AT1G22985
AT1G23020
AT1G23030
AT1G23040
AT1G23050
AT1G23052
AT1G23080
AT1G23090
AT1G23140
AT1G23170
AT1G23180
AT1G23190
AT1G23220
AT1G23230
AT1G23260
AT1G23280
AT1G23290
AT1G23310
AT1G23330
AT1G23360
AT1G23390
AT1G23400
AT1G23440
AT1G23465
AT1G23480
AT1G23490
AT1G23550
AT1G23710
AT1G23740
AT1G23750
AT1G23780
AT1G23820
AT1G23830
AT1G23840
AT1G23860
AT1G23870
AT1G23880
AT1G23890
AT1G23900
AT1G23950
AT1G23960
AT1G23965
AT1G23970
AT1G23980
AT1G24040
AT1G24050
AT1G24095
AT1G24100
AT1G24120
AT1G24140
AT1G24147
AT1G24148
AT1G24150
AT1G24160
AT1G24170
AT1G24180
AT1G24190
AT1G24210
AT1G24240
AT1G24267
AT1G24280
AT1G24290
AT1G24300
AT1G24310
AT1G24330
AT1G24340
AT1G24350
AT1G24360
AT1G24440
AT1G24450
AT1G24460
AT1G24490
AT1G24510
AT1G24530
AT1G24560
AT1G24610
AT1G24625
AT1G24706
AT1G24764
AT1G24793
AT1G24800
AT1G24822
AT1G24880
AT1G24881
AT1G24996
AT1G25054
AT1G25055
AT1G25098
AT1G25097
AT1G25145
AT1G25150
AT1G25175
AT1G25210
AT1G25211
AT1G25220
AT1G25260
AT1G25275
AT1G25280
AT1G25290
AT1G25320
AT1G25350
AT1G25360
AT1G25370
AT1G25375
AT1G25380
AT1G25390
AT1G25400
AT1G25420
AT1G25425
AT1G25440
AT1G25470
AT1G25472
AT1G25480
AT1G25490
AT1G25500
AT1G25510
AT1G25520
AT1G25540
AT1G25550
AT1G25560
AT1G25570
AT1G25580
AT1G25682
AT1G26090
AT1G26100
AT1G26110
AT1G26120
AT1G26130
AT1G26150
AT1G26160
AT1G26170
AT1G26180
AT1G26190
AT1G26208
AT1G26210
AT1G26218
AT1G26220
AT1G26230
AT1G26233
AT1G26235
AT1G26260
AT1G26270
AT1G26300
AT1G26340
AT1G26370
AT1G26440
AT1G26460
AT1G26470
AT1G26490
AT1G26500
AT1G26520
AT1G26530
AT1G26550
AT1G26570
AT1G26580
AT1G26620
AT1G26630
AT1G26650
AT1G26640
AT1G26660
AT1G26665
AT1G26670
AT1G26690
AT1G26730
AT1G26740
AT1G26750
AT1G26761
AT1G26770
AT1G26800
AT1G26810
AT1G26830
AT1G26850
AT1G26880
AT1G26900
AT1G26910
AT1G26920
AT1G26921
AT1G26930
AT1G26940
AT1G26960
AT1G27000
AT1G27050
AT1G27060
AT1G27070
AT1G27090
AT1G27100
AT1G27120
AT1G27130
AT1G27150
AT1G27170
AT1G27190
AT1G27200
AT1G27210
AT1G27290
AT1G27300
AT1G27310
AT1G27320
AT1G27330
AT1G27340
AT1G27350
AT1G27360
AT1G27370
AT1G27385
AT1G27390
AT1G27400
AT1G27410
AT1G27430
AT1G27435
AT1G27440
AT1G27450
AT1G27460
AT1G27470
AT1G27480
AT1G27500
AT1G27510
AT1G27520
AT1G27530
AT1G27540
AT1G27590
AT1G27600
AT1G27630
AT1G27640
AT1G27650
AT1G27680
AT1G27690
AT1G27695
AT1G27700
AT1G27720
AT1G27730
AT1G27750
AT1G27752
AT1G27760
AT1G27770
AT1G27840
AT1G27850
AT1G27900
AT1G27910
AT1G27920
AT1G27921
AT1G27930
AT1G27950
AT1G27960
AT1G27970
AT1G27980
AT1G28050
AT1G28060
AT1G28070
AT1G28090
AT1G28100
AT1G28110
AT1G28120
AT1G28140
AT1G28150
AT1G28190
AT1G28200
AT1G28210
AT1G28230
AT1G28240
AT1G28250
AT1G28260
AT1G28280
AT1G28281
AT1G28310
AT1G28320
AT1G28330
AT1G28340
AT1G28350
AT1G28370
AT1G28380
AT1G28390
AT1G28395
AT1G28420
AT1G28410
AT1G28440
AT1G28490
AT1G28510
AT1G28520
AT1G28530
AT1G28540
AT1G28560
AT1G28580
AT1G28600
AT1G28610
AT1G28660
AT1G28670
AT1G28680
AT1G28685
AT1G28690
AT1G28760
AT1G28960
AT1G29030
AT1G29040
AT1G29041
AT1G29050
AT1G29060
AT1G29070
AT1G29120
AT1G29150
AT1G29170
AT1G29220
AT1G29240
AT1G29260
AT1G29250
AT1G29280
AT1G29300
AT1G29310
AT1G29320
AT1G29330
AT1G29340
AT1G29350
AT1G29355
AT1G29357
AT1G29370
AT1G29390
AT1G29395
AT1G29400
AT1G29410
AT1G29418
AT1G29465
AT1G29470
AT1G29530
AT1G29550
AT1G29590
AT1G29630
AT1G29640
AT1G29660
AT1G29670
AT1G29690
AT1G29700
AT1G29710
AT1G29720
AT1G29740
AT1G29750
AT1G29760
AT1G29785
AT1G29790
AT1G29800
AT1G29820
AT1G29810
AT1G29840
AT1G29850
AT1G29880
AT1G29890
AT1G29900
AT1G29910
AT1G29920
AT1G29930
AT1G29940
AT1G29950
AT1G29951
AT1G29952
AT1G29960
AT1G29965
AT1G29970
AT1G29980
AT1G29990
AT1G30000
AT1G30010
AT1G30040
AT1G30070
AT1G30090
AT1G30100
AT1G30120
AT1G30130
AT1G30200
AT1G30210
AT1G30230
AT1G30240
AT1G30250
AT1G30260
AT1G30270
AT1G30280
AT1G30282
AT1G30290
AT1G30300
AT1G30320
AT1G30330
AT1G30360
AT1G30380
AT1G30400
AT1G30410
AT1G30440
AT1G30450
AT1G30460
AT1G30470
AT1G30475
AT1G30480
AT1G30490
AT1G30500
AT1G30510
AT1G30520
AT1G30530
AT1G30540
AT1G30550
AT1G30570
AT1G30580
AT1G30590
AT1G30600
AT1G30610
AT1G30620
AT1G30630
AT1G30640
AT1G30680
AT1G30690
AT1G30740
AT1G30755
AT1G30757
AT1G30810
AT1G30820
AT1G30825
AT1G30845
AT1G30860
AT1G30890
AT1G30880
AT1G30900
AT1G30910
AT1G30960
AT1G30970
AT1G31010
AT1G31020
AT1G31070
AT1G31120
AT1G31130
AT1G31150
AT1G31160
AT1G31170
AT1G31173
AT1G31175
AT1G31180
AT1G31190
AT1G31220
AT1G31230
AT1G31240
AT1G31280
AT1G31300
AT1G31330
AT1G31335
AT1G31340
AT1G31350
AT1G31360
AT1G31410
AT1G31420
AT1G31430
AT1G31440
AT1G31460
AT1G31470
AT1G31480
AT1G31500
AT1G31540
AT1G31550
AT1G31580
AT1G31600
AT1G31650
[truncated: 14,123 more rows]

## Sheet: t0 K4
AT1G01010
AT1G01020
AT1G01040
AT1G01050
AT1G01060
AT1G01080
AT1G01090
AT1G01100
AT1G01110
AT1G01120
AT1G01130
AT1G01140
AT1G01150
AT1G01160
AT1G01170
AT1G01180
AT1G01183
AT1G01200
AT1G01210
AT1G01220
AT1G01225
AT1G01230
AT1G01240
AT1G01250
AT1G01260
AT1G01290
AT1G01300
AT1G01310
AT1G01320
AT1G01340
AT1G01350
AT1G01360
AT1G01370
AT1G01420
AT1G01430
AT1G01440
AT1G01448
AT1G01490
AT1G01500
AT1G01510
AT1G01540
AT1G01550
AT1G01560
AT1G01570
AT1G01600
AT1G01610
AT1G01620
AT1G01630
AT1G01650
AT1G01680
AT1G01670
AT1G01690
AT1G01700
AT1G01710
AT1G01720
AT1G01725
AT1G01730
AT1G01740
AT1G01760
AT1G01770
AT1G01790
AT1G01810
AT1G01800
AT1G01820
AT1G01830
AT1G01840
AT1G01860
AT1G01870
AT1G01880
AT1G01910
AT1G01920
AT1G01930
AT1G01940
AT1G01950
AT1G01960
AT1G01970
AT1G01990
AT1G02000
AT1G02010
AT1G02020
AT1G02030
AT1G02040
AT1G02060
AT1G02065
AT1G02080
AT1G02090
AT1G02100
AT1G02120
AT1G02110
AT1G02130
AT1G02140
AT1G02145
AT1G02160
AT1G02170
AT1G02180
AT1G02150
AT1G02190
AT1G02205
AT1G02230
AT1G02260
AT1G02270
AT1G02280
AT1G02290
AT1G02300
AT1G02305
AT1G02330
AT1G02350
AT1G02370
AT1G02380
AT1G02410
AT1G02420
AT1G02450
AT1G02475
AT1G02500
AT1G02530
AT1G02560
AT1G02640
AT1G02650
AT1G02660
AT1G02670
AT1G02680
AT1G02690
AT1G02720
AT1G02730
AT1G02740
AT1G02750
AT1G02780
AT1G02800
AT1G02810
AT1G02813
AT1G02816
AT1G02840
AT1G02860
AT1G02870
AT1G02880
AT1G02890
AT1G02910
AT1G02960
AT1G02965
AT1G02970
AT1G02990
AT1G03000
AT1G03030
AT1G03040
AT1G03060
AT1G03080
AT1G03090
AT1G03100
AT1G03106
AT1G03110
AT1G03120
AT1G03140
AT1G03130
AT1G03150
AT1G03160
AT1G03170
AT1G03180
AT1G03190
AT1G03200
AT1G03210
AT1G03220
AT1G03230
AT1G03250
AT1G03260
AT1G03270
AT1G03280
AT1G03290
AT1G03300
AT1G03310
AT1G03330
AT1G03350
AT1G03360
AT1G03365
AT1G03370
AT1G03380
AT1G03400
AT1G03410
AT1G03420
AT1G03430
AT1G03440
AT1G03457
AT1G03470
AT1G03475
AT1G03495
AT1G03502
AT1G03506
AT1G03510
AT1G03515
AT1G03520
AT1G03530
AT1G03540
AT1G03560
AT1G03570
AT1G03590
AT1G03600
AT1G03610
AT1G03630
AT1G03650
AT1G03687
AT1G03680
AT1G03710
AT1G03730
AT1G03740
AT1G03743
AT1G03746
AT1G03750
AT1G03760
AT1G03770
AT1G03780
AT1G03800
AT1G03830
AT1G03860
AT1G03890
AT1G03900
AT1G03905
AT1G03910
AT1G03930
AT1G03935
AT1G03940
AT1G03950
AT1G03960
AT1G03970
AT1G03980
AT1G03990
AT1G04000
AT1G04020
AT1G04010
AT1G04030
AT1G04040
AT1G04070
AT1G04080
AT1G04050
AT1G04090
AT1G04100
AT1G04110
AT1G04120
AT1G04130
AT1G04140
AT1G04150
AT1G04160
AT1G04170
AT1G04190
AT1G04200
AT1G04210
AT1G04220
AT1G04230
AT1G04240
AT1G04250
AT1G04260
AT1G04270
AT1G04280
AT1G04290
AT1G04295
AT1G04300
AT1G04310
AT1G04340
AT1G04360
AT1G04390
AT1G04400
AT1G04410
AT1G04420
AT1G04430
AT1G04440
AT1G04480
AT1G04510
AT1G04520
AT1G04530
AT1G04540
AT1G04550
AT1G04555
AT1G04570
AT1G04590
AT1G04600
AT1G04620
AT1G04630
AT1G04635
AT1G04640
AT1G04650
AT1G04680
AT1G04690
AT1G04700
AT1G04710
AT1G04730
AT1G04750
AT1G04760
AT1G04770
AT1G04780
AT1G04790
AT1G04810
AT1G04820
AT1G04830
AT1G04840
AT1G04850
AT1G04860
AT1G04870
AT1G04900
AT1G04910
AT1G04920
AT1G04930
AT1G04940
AT1G04945
AT1G04950
AT1G04970
AT1G04960
AT1G04980
AT1G04985
AT1G04990
AT1G05000
AT1G05010
AT1G05020
AT1G05030
AT1G05055
AT1G05060
AT1G05065
AT1G05070
AT1G05090
AT1G05100
AT1G05120
AT1G05136
AT1G05140
AT1G05150
AT1G05160
AT1G05170
AT1G05180
AT1G05190
AT1G05200
AT1G05205
AT1G05210
AT1G05230
AT1G05270
AT1G05300
AT1G05350
AT1G05360
AT1G05370
AT1G05380
AT1G05385
AT1G05390
AT1G05410
AT1G05420
AT1G05430
AT1G05440
AT1G05460
AT1G05470
AT1G05500
AT1G05520
AT1G05560
AT1G05562
AT1G05570
AT1G05575
AT1G05590
AT1G05600
AT1G05620
AT1G05630
AT1G05640
AT1G05670
AT1G05675
AT1G05690
AT1G05710
AT1G05720
AT1G05730
AT1G05750
AT1G05780
AT1G05785
AT1G05790
AT1G05805
AT1G05810
AT1G05830
AT1G05835
AT1G05840
AT1G05850
AT1G05860
AT1G05870
AT1G05890
AT1G05900
AT1G05910
AT1G05940
AT1G05950
AT1G05960
AT1G05970
AT1G06000
AT1G06002
AT1G06010
AT1G06040
AT1G06050
AT1G06060
AT1G06070
AT1G06080
AT1G06110
AT1G06130
AT1G06140
AT1G06149
AT1G06150
AT1G06160
AT1G06180
AT1G06190
AT1G06200
AT1G06210
AT1G06220
AT1G06230
AT1G06240
AT1G06270
AT1G06290
AT1G06310
AT1G06350
AT1G06360
AT1G06380
AT1G06390
AT1G06400
AT1G06410
AT1G06420
AT1G06430
AT1G06440
AT1G06450
AT1G06460
AT1G06470
AT1G06475
AT1G06490
AT1G06500
AT1G06510
AT1G06515
AT1G06530
AT1G06540
AT1G06550
AT1G06560
AT1G06570
AT1G06580
AT1G06590
AT1G06610
AT1G06620
AT1G06630
AT1G06650
AT1G06660
AT1G06670
AT1G06680
AT1G06690
AT1G06700
AT1G06710
AT1G06730
AT1G06720
AT1G06740
AT1G06750
AT1G06760
AT1G06770
AT1G06780
AT1G06790
AT1G06800
AT1G06820
AT1G06840
AT1G06850
AT1G06870
AT1G06890
AT1G06900
AT1G06910
AT1G06950
AT1G06960
AT1G07000
AT1G07010
AT1G07020
AT1G07030
AT1G07040
AT1G07060
AT1G07070
AT1G07080
AT1G07090
AT1G07119
AT1G07120
AT1G07110
AT1G07128
AT1G07130
AT1G07135
AT1G07140
AT1G07150
AT1G07170
AT1G07200
AT1G07210
AT1G07220
AT1G07230
AT1G07240
AT1G07250
AT1G07260
AT1G07270
AT1G07280
AT1G07290
AT1G07310
AT1G07320
AT1G07350
AT1G07370
AT1G07360
AT1G07390
AT1G07400
AT1G07410
AT1G07420
AT1G07430
AT1G07440
AT1G07470
AT1G07480
AT1G07485
AT1G07490
AT1G07510
AT1G07520
AT1G07530
AT1G07570
AT1G07590
AT1G07620
AT1G07615
AT1G07630
AT1G07650
AT1G07660
AT1G07670
AT1G07700
AT1G07702
AT1G07705
AT1G07720
AT1G07725
AT1G07728
AT1G07740
AT1G07745
AT1G07750
AT1G07770
AT1G07780
AT1G07790
AT1G07795
AT1G07810
AT1G07820
AT1G07830
AT1G07840
AT1G07870
AT1G07885
AT1G07890
AT1G07901
AT1G07910
AT1G07920
AT1G07930
AT1G07940
AT1G07950
AT1G07960
AT1G07970
AT1G07980
AT1G07990
AT1G08000
AT1G08005
AT1G08010
AT1G08030
AT1G08040
AT1G08050
AT1G08060
AT1G08070
AT1G08110
AT1G08125
AT1G08130
AT1G08180
AT1G08190
AT1G08200
AT1G08210
AT1G08220
AT1G08230
AT1G08250
AT1G08260
AT1G08270
AT1G08280
AT1G08290
AT1G08300
AT1G08310
AT1G08315
AT1G08350
AT1G08360
AT1G08370
AT1G08380
AT1G08390
AT1G08400
AT1G08410
AT1G08420
AT1G08460
AT1G08450
AT1G08470
AT1G08480
AT1G08490
AT1G08510
AT1G08520
AT1G08530
AT1G08540
AT1G08550
AT1G08560
AT1G08570
AT1G08580
AT1G08590
AT1G08592
AT1G08600
AT1G08610
AT1G08620
AT1G08640
AT1G08650
AT1G08660
AT1G08680
AT1G08700
AT1G08710
AT1G08720
AT1G08730
AT1G08750
AT1G08760
AT1G08770
AT1G08780
AT1G08800
AT1G08820
AT1G08830
AT1G08845
AT1G08840
AT1G08860
AT1G08870
AT1G08880
AT1G08900
AT1G08910
AT1G08930
AT1G08940
AT1G08960
AT1G08970
AT1G08980
AT1G09000
AT1G09010
AT1G09020
AT1G09040
AT1G09060
AT1G09070
AT1G09100
AT1G09130
AT1G09140
AT1G09150
AT1G09160
AT1G09180
AT1G09190
AT1G09195
AT1G09200
AT1G09210
AT1G09220
AT1G09230
AT1G09250
AT1G09270
AT1G09280
AT1G09290
AT1G09300
AT1G09310
AT1G09320
AT1G09340
AT1G09330
AT1G09390
AT1G09415
AT1G09420
AT1G09421
AT1G09430
AT1G09440
AT1G09450
AT1G09460
AT1G09470
AT1G09490
AT1G09510
AT1G09520
AT1G09530
AT1G09560
AT1G09570
AT1G09575
AT1G09580
AT1G09590
AT1G09600
AT1G09620
AT1G09630
AT1G09640
AT1G09645
AT1G09650
AT1G09660
AT1G09680
AT1G09690
AT1G09700
AT1G09710
AT1G09730
AT1G09740
AT1G09750
AT1G09760
AT1G09770
AT1G09780
AT1G09794
AT1G09795
AT1G09800
AT1G09810
AT1G09812
AT1G09815
AT1G09820
AT1G09830
AT1G09840
AT1G09850
AT1G09870
AT1G09900
AT1G09910
AT1G09920
AT1G09940
AT1G09950
AT1G09960
AT1G09970
AT1G09980
AT1G10020
AT1G10030
AT1G10050
AT1G10040
AT1G10090
AT1G10095
AT1G10100
AT1G10110
AT1G10120
AT1G10130
AT1G10140
AT1G10150
AT1G10170
AT1G10180
AT1G10200
AT1G10210
AT1G10230
AT1G10240
AT1G10260
AT1G10270
AT1G10280
AT1G10290
AT1G10310
AT1G10320
AT1G10330
AT1G10350
AT1G10360
AT1G10370
AT1G10390
AT1G10410
AT1G10417
AT1G10430
AT1G10450
AT1G10460
AT1G10470
AT1G10490
AT1G10500
AT1G10510
AT1G10520
AT1G10522
AT1G10530
AT1G10540
AT1G10560
AT1G10570
AT1G10580
AT1G10590
AT1G10600
AT1G10630
AT1G10640
AT1G10650
AT1G10657
AT1G10660
AT1G10670
AT1G10690
AT1G10700
AT1G10710
AT1G10720
AT1G10730
AT1G10740
AT1G10750
AT1G10760
AT1G10780
AT1G10820
AT1G10830
AT1G10840
AT1G10850
AT1G10865
AT1G10870
AT1G10880
AT1G10890
AT1G10900
AT1G10910
AT1G10920
AT1G10930
AT1G10940
AT1G10950
AT1G10960
AT1G10970
AT1G10980
AT1G10990
AT1G11000
AT1G11010
AT1G11020
AT1G11050
AT1G11060
AT1G11100
AT1G11090
AT1G11112
AT1G11120
AT1G11125
AT1G11130
AT1G11160
AT1G11175
AT1G11180
AT1G11200
AT1G11210
AT1G11220
AT1G11240
AT1G11260
AT1G11270
AT1G11280
AT1G11290
AT1G11300
AT1G11310
AT1G11320
AT1G11330
AT1G11350
AT1G11360
AT1G11370
AT1G11380
AT1G11390
AT1G11400
AT1G11420
AT1G11430
AT1G11440
AT1G11475
AT1G11480
AT1G11545
AT1G11592
AT1G11600
AT1G11630
AT1G11640
AT1G11650
AT1G11660
AT1G11670
AT1G11680
AT1G11700
AT1G11710
AT1G11720
AT1G11730
AT1G11735
AT1G11740
AT1G11750
AT1G11755
AT1G11760
AT1G11780
AT1G11790
AT1G11800
AT1G11820
AT1G11840
AT1G11860
AT1G11870
AT1G11880
AT1G11890
AT1G11905
AT1G11900
AT1G11910
AT1G11930
AT1G11940
AT1G11950
AT1G11960
AT1G12000
AT1G12013
AT1G12015
AT1G12020
AT1G12050
AT1G12060
AT1G12090
AT1G12120
AT1G12140
AT1G12160
AT1G12210
AT1G12230
AT1G12240
AT1G12244
AT1G12250
AT1G12270
AT1G12290
AT1G12294
AT1G12300
AT1G12310
AT1G12330
AT1G12340
AT1G12350
AT1G12360
AT1G12370
AT1G12380
AT1G12390
AT1G12400
AT1G12410
AT1G12420
AT1G12430
AT1G12440
AT1G12450
AT1G12460
AT1G12470
AT1G12500
AT1G12520
AT1G12530
AT1G12550
AT1G12580
AT1G12610
AT1G12620
AT1G12640
AT1G12650
AT1G12680
AT1G12700
AT1G12710
AT1G12730
AT1G12750
AT1G12760
AT1G12770
AT1G12775
AT1G12780
AT1G12790
AT1G12800
AT1G12805
AT1G12810
AT1G12820
AT1G12840
AT1G12830
AT1G12845
AT1G12850
AT1G12860
AT1G12900
AT1G12910
AT1G12920
AT1G12930
AT1G12940
AT1G12970
AT1G12980
AT1G12990
AT1G13000
AT1G13020
AT1G13030
AT1G13040
AT1G13060
AT1G13080
AT1G13090
AT1G13110
AT1G13120
AT1G13140
AT1G13160
AT1G13170
AT1G13180
AT1G13190
AT1G13195
AT1G13210
AT1G13220
AT1G13245
AT1G13250
AT1G13260
AT1G13270
AT1G13280
AT1G13290
AT1G13320
AT1G13330
AT1G13350
AT1G13360
AT1G13380
AT1G13390
AT1G13410
AT1G13440
AT1G13450
AT1G13460
AT1G13560
AT1G13570
AT1G13580
AT1G13630
AT1G13640
AT1G13690
AT1G13710
AT1G13730
AT1G13740
AT1G13750
AT1G13770
AT1G13780
AT1G13800
AT1G13810
AT1G13820
AT1G13860
AT1G13870
AT1G13880
AT1G13900
AT1G13910
AT1G13930
AT1G13940
AT1G13960
AT1G13980
AT1G13990
AT1G14000
AT1G14010
AT1G14020
AT1G14030
AT1G14040
AT1G14060
AT1G14070
AT1G14071
AT1G14130
AT1G14140
AT1G14150
AT1G14170
AT1G14180
AT1G14190
AT1G14200
AT1G14205
AT1G14230
AT1G14270
AT1G14290
AT1G14310
AT1G14300
AT1G14320
AT1G14330
AT1G14340
AT1G14345
AT1G14350
AT1G14360
AT1G14370
AT1G14380
AT1G14400
AT1G14410
AT1G14430
AT1G14440
AT1G14450
AT1G14455
AT1G14460
AT1G14470
AT1G14490
AT1G14510
AT1G14530
AT1G14560
AT1G14570
AT1G14590
AT1G14600
AT1G14610
AT1G14620
AT1G14640
AT1G14650
AT1G14660
AT1G14670
AT1G14680
AT1G14685
AT1G14686
AT1G14687
AT1G14688
AT1G14690
AT1G14710
AT1G14720
AT1G14740
AT1G14750
AT1G14770
AT1G14780
AT1G14790
AT1G14810
AT1G14820
AT1G14830
AT1G14840
AT1G14850
AT1G14890
AT1G14900
AT1G14910
AT1G14920
AT1G14970
AT1G14980
AT1G14990
AT1G15000
AT1G15002
AT1G15020
AT1G15030
AT1G15060
AT1G15080
AT1G15100
AT1G15110
AT1G15120
AT1G15130
AT1G15140
AT1G15165
AT1G15170
AT1G15175
AT1G15180
AT1G15190
AT1G15200
AT1G15215
AT1G15220
AT1G15240
AT1G15230
AT1G15250
AT1G15260
AT1G15270
AT1G15280
AT1G15290
AT1G15300
AT1G15310
AT1G15320
AT1G15330
AT1G15340
AT1G15350
AT1G15370
AT1G15390
AT1G15400
AT1G15405
AT1G15410
AT1G15420
AT1G15430
AT1G15440
AT1G15470
AT1G15480
AT1G15490
AT1G15500
AT1G15510
AT1G15520
AT1G15530
AT1G15570
AT1G15660
AT1G15670
AT1G15690
AT1G15700
AT1G15710
AT1G15720
AT1G15730
AT1G15740
AT1G15750
AT1G15760
AT1G15770
AT1G15780
AT1G15800
AT1G15810
AT1G15820
AT1G15825
AT1G15830
AT1G15860
AT1G15870
AT1G15880
AT1G15900
AT1G15910
AT1G15920
AT1G15930
AT1G15940
AT1G15950
AT1G15980
AT1G15970
AT1G16000
AT1G16010
AT1G16020
AT1G16030
AT1G16040
AT1G16060
AT1G16070
AT1G16080
AT1G16110
AT1G16170
AT1G16180
AT1G16190
AT1G16210
AT1G16220
AT1G16240
AT1G16250
AT1G16270
AT1G16280
AT1G16290
AT1G16300
AT1G16320
AT1G16330
AT1G16340
AT1G16350
AT1G16430
AT1G16440
AT1G16445
AT1G16470
AT1G16460
AT1G16480
AT1G16489
AT1G16490
AT1G16500
AT1G16510
AT1G16515
AT1G16520
AT1G16540
AT1G16560
AT1G16570
AT1G16590
AT1G16610
AT1G16630
AT1G16635
AT1G16640
AT1G16650
AT1G16670
AT1G16680
AT1G16690
AT1G16700
AT1G16710
AT1G16720
AT1G16730
AT1G16740
AT1G16750
AT1G16770
AT1G16780
AT1G16790
AT1G16810
AT1G16800
AT1G16820
AT1G16825
AT1G16830
AT1G16840
AT1G16858
AT1G16860
AT1G16870
AT1G16880
AT1G16890
AT1G16900
AT1G16910
AT1G16916
AT1G16920
AT1G16930
AT1G16970
AT1G17030
AT1G17040
AT1G17050
AT1G17070
AT1G17080
AT1G17090
AT1G17100
AT1G17110
AT1G17120
AT1G17130
AT1G17140
AT1G17145
AT1G17147
AT1G17160
AT1G17170
AT1G17200
AT1G17220
AT1G17210
AT1G17230
AT1G17232
AT1G17235
AT1G17240
AT1G17250
AT1G17255
AT1G17270
AT1G17280
AT1G17290
AT1G17330
AT1G17340
AT1G17350
AT1G17360
AT1G17370
AT1G17380
AT1G17410
AT1G17420
AT1G17430
AT1G17440
AT1G17455
AT1G17450
AT1G17460
AT1G17470
AT1G17480
AT1G17490
AT1G17500
AT1G17510
AT1G17520
AT1G17530
AT1G17550
AT1G17560
AT1G17570
AT1G17580
AT1G17590
AT1G17600
AT1G17620
AT1G17630
AT1G17640
AT1G17650
AT1G17665
AT1G17670
AT1G17680
AT1G17690
AT1G17720
AT1G17730
AT1G17744
AT1G17745
AT1G17750
AT1G17760
AT1G17780
AT1G17790
AT1G17820
AT1G17840
AT1G17850
AT1G17860
AT1G17870
AT1G17880
AT1G17890
AT1G17920
AT1G17930
AT1G17940
AT1G17970
AT1G17980
AT1G18000
AT1G18010
AT1G18030
AT1G18040
AT1G18060
AT1G18070
AT1G18075
AT1G18080
AT1G18090
AT1G18140
AT1G18150
AT1G18160
AT1G18170
AT1G18180
AT1G18190
AT1G18210
AT1G18250
AT1G18260
AT1G18265
AT1G18270
AT1G18290
AT1G18300
AT1G18320
AT1G18330
AT1G18335
AT1G18340
AT1G18360
AT1G18370
AT1G18382
AT1G18390
AT1G18415
AT1G18420
AT1G18430
AT1G18440
AT1G18450
AT1G18460
AT1G18470
AT1G18480
AT1G18485
AT1G18490
AT1G18500
AT1G18540
AT1G18550
AT1G18560
AT1G18580
AT1G18600
AT1G18610
AT1G18620
AT1G18630
AT1G18640
AT1G18650
AT1G18660
AT1G18670
AT1G18680
AT1G18690
AT1G18700
AT1G18720
AT1G18730
AT1G18740
AT1G18745
AT1G18750
AT1G18773
AT1G18800
AT1G18810
AT1G18840
AT1G18850
AT1G18890
AT1G18900
AT1G18910
AT1G18940
AT1G18950
AT1G19000
AT1G19010
AT1G19020
AT1G19025
AT1G19030
AT1G19040
AT1G19050
AT1G19070
AT1G19080
AT1G19100
AT1G19110
AT1G19120
AT1G19130
AT1G19140
AT1G19150
AT1G19170
AT1G19180
AT1G19190
AT1G19200
AT1G19210
AT1G19220
AT1G19240
AT1G19250
AT1G19270
AT1G19290
AT1G19300
AT1G19310
AT1G19330
AT1G19340
AT1G19350
AT1G19360
AT1G19370
AT1G19373
AT1G19376
AT1G19380
AT1G19400
AT1G19410
AT1G19430
AT1G19440
AT1G19450
AT1G19480
AT1G19485
AT1G19490
AT1G19520
AT1G19540
AT1G19570
AT1G19580
AT1G19600
AT1G19650
AT1G19660
AT1G19670
AT1G19680
AT1G19690
AT1G19700
AT1G19710
AT1G19720
AT1G19730
AT1G19740
AT1G19750
AT1G19770
AT1G19780
AT1G19790
AT1G19800
AT1G19830
AT1G19835
AT1G19840
AT1G19850
AT1G19860
AT1G19870
AT1G19880
AT1G19910
AT1G19920
AT1G19950
AT1G19970
AT1G19980
AT1G19990
AT1G20010
AT1G20015
AT1G20020
AT1G20030
AT1G20050
AT1G20060
AT1G20065
AT1G20090
AT1G20100
AT1G20110
AT1G20140
AT1G20200
AT1G20220
AT1G20225
AT1G20230
AT1G20260
AT1G20270
AT1G20300
AT1G20290
AT1G20310
AT1G20330
AT1G20340
AT1G20370
AT1G20380
AT1G20410
AT1G20420
AT1G20430
AT1G20440
AT1G20450
AT1G20460
AT1G20480
AT1G20490
AT1G20510
AT1G20515
AT1G20530
AT1G20540
AT1G20550
AT1G20560
AT1G20570
AT1G20575
AT1G20580
AT1G20610
AT1G20630
AT1G20620
AT1G20640
AT1G20650
AT1G20670
AT1G20693
AT1G20690
AT1G20691
AT1G20696
AT1G20720
AT1G20760
AT1G20770
AT1G20780
AT1G20810
AT1G20816
AT1G20823
AT1G20820
AT1G20830
AT1G20840
AT1G20875
AT1G20880
AT1G20890
AT1G20910
AT1G20920
AT1G20930
AT1G20950
AT1G20960
AT1G20970
AT1G20980
AT1G21000
AT1G21010
AT1G21050
AT1G21060
AT1G21065
AT1G21070
AT1G21080
AT1G21090
AT1G21150
AT1G21160
AT1G21170
AT1G21190
AT1G21200
AT1G21220
AT1G21250
AT1G21260
AT1G21270
AT1G21280
AT1G21281
AT1G21310
AT1G21320
AT1G21350
AT1G21370
AT1G21380
AT1G21390
AT1G21400
AT1G21410
AT1G21440
AT1G21450
AT1G21480
AT1G21500
AT1G21520
AT1G21560
AT1G21580
AT1G21590
AT1G21600
AT1G21610
AT1G21630
AT1G21640
AT1G21650
AT1G21651
AT1G21660
AT1G21670
AT1G21680
AT1G21690
AT1G21695
AT1G21700
AT1G21710
AT1G21720
AT1G21730
AT1G21740
AT1G21750
AT1G21760
AT1G21770
AT1G21780
AT1G21790
AT1G21830
AT1G21840
AT1G21880
AT1G21900
AT1G21920
AT1G21930
AT1G21940
AT1G21980
AT1G22020
AT1G22030
AT1G22040
AT1G22050
AT1G22060
AT1G22070
AT1G22110
AT1G22140
AT1G22160
AT1G22170
AT1G22180
AT1G22190
AT1G22200
AT1G22220
AT1G22250
AT1G22260
AT1G22270
AT1G22275
AT1G22280
AT1G22300
AT1G22310
AT1G22330
AT1G22403
AT1G22410
AT1G22430
AT1G22450
AT1G22470
AT1G22480
AT1G22490
AT1G22510
AT1G22520
AT1G22530
AT1G22540
AT1G22550
AT1G22600
AT1G22610
AT1G22620
AT1G22630
AT1G22640
AT1G22650
AT1G22660
AT1G22700
AT1G22730
AT1G22740
AT1G22750
AT1G22770
AT1G22780
AT1G22790
AT1G22800
AT1G22810
AT1G22830
AT1G22840
AT1G22850
AT1G22860
AT1G22870
AT1G22880
AT1G22882
AT1G22920
AT1G22930
AT1G22940
AT1G22950
AT1G22960
AT1G22970
AT1G22985
AT1G23000
AT1G23030
AT1G23050
AT1G23052
AT1G23080
AT1G23090
AT1G23100
AT1G23170
AT1G23180
AT1G23190
AT1G23205
AT1G23220
AT1G23230
AT1G23260
AT1G23280
AT1G23290
AT1G23300
AT1G23310
AT1G23330
AT1G23340
AT1G23360
AT1G23380
AT1G23390
AT1G23400
AT1G23410
AT1G23440
AT1G23465
AT1G23480
AT1G23490
AT1G23550
AT1G23710
AT1G23740
AT1G23750
AT1G23780
AT1G23790
AT1G23820
AT1G23860
AT1G23870
AT1G23880
AT1G23890
AT1G23900
AT1G23935
AT1G23950
AT1G23960
AT1G23965
AT1G23970
AT1G23980
AT1G24020
AT1G24040
AT1G24050
AT1G24090
AT1G24095
AT1G24100
AT1G24120
AT1G24140
AT1G24150
AT1G24160
AT1G24170
AT1G24180
AT1G24190
AT1G24210
AT1G24240
AT1G24265
AT1G24267
AT1G24280
AT1G24290
AT1G24300
AT1G24310
AT1G24330
AT1G24340
AT1G24350
AT1G24360
AT1G24440
AT1G24450
AT1G24460
AT1G24470
AT1G24490
AT1G24510
AT1G24530
AT1G24560
AT1G24610
AT1G24625
AT1G24706
AT1G24764
AT1G24793
AT1G24880
AT1G25054
AT1G25145
AT1G25210
AT1G25220
AT1G25260
AT1G25275
AT1G25280
AT1G25290
AT1G25320
AT1G25350
AT1G25360
AT1G25370
AT1G25375
AT1G25380
AT1G25390
AT1G25400
AT1G25420
AT1G25440
AT1G25450
AT1G25470
AT1G25472
AT1G25480
AT1G25490
AT1G25500
AT1G25510
AT1G25520
AT1G25530
AT1G25540
AT1G25550
AT1G25560
AT1G25570
AT1G25580
AT1G25682
AT1G26090
AT1G26100
AT1G26110
AT1G26120
AT1G26130
AT1G26150
AT1G26160
AT1G26170
AT1G26180
AT1G26190
AT1G26208
AT1G26210
AT1G26218
AT1G26220
AT1G26230
AT1G26235
AT1G26260
AT1G26270
AT1G26300
AT1G26310
AT1G26330
AT1G26340
AT1G26370
AT1G26440
AT1G26460
AT1G26470
AT1G26500
AT1G26520
AT1G26530
AT1G26540
AT1G26550
AT1G26560
AT1G26570
AT1G26580
AT1G26620
AT1G26630
AT1G26650
AT1G26660
AT1G26640
AT1G26665
AT1G26670
AT1G26690
AT1G26740
AT1G26750
AT1G26760
AT1G26761
AT1G26770
AT1G26780
AT1G26800
AT1G26810
AT1G26830
AT1G26840
AT1G26850
AT1G26880
AT1G26900
AT1G26910
AT1G26920
AT1G26930
AT1G26940
AT1G26960
AT1G27000
AT1G27050
AT1G27060
AT1G27070
AT1G27090
AT1G27100
AT1G27110
AT1G27120
AT1G27130
AT1G27140
AT1G27150
AT1G27170
AT1G27190
AT1G27200
AT1G27210
AT1G27290
AT1G27300
AT1G27310
AT1G27320
AT1G27330
AT1G27340
AT1G27350
AT1G27360
AT1G27370
AT1G27385
AT1G27390
AT1G27400
AT1G27410
AT1G27430
AT1G27435
AT1G27440
AT1G27450
AT1G27460
AT1G27470
AT1G27480
AT1G27500
AT1G27510
AT1G27520
AT1G27530
AT1G27570
AT1G27590
AT1G27600
AT1G27620
AT1G27630
AT1G27640
AT1G27650
AT1G27660
AT1G27680
AT1G27690
AT1G27695
AT1G27700
AT1G27720
AT1G27730
AT1G27750
AT1G27752
AT1G27760
AT1G27770
AT1G27820
AT1G27840
AT1G27850
AT1G27880
AT1G27900
AT1G27910
AT1G27920
AT1G27921
AT1G27930
AT1G27950
AT1G27960
AT1G27970
AT1G27980
AT1G28050
AT1G28060
AT1G28070
AT1G28090
AT1G28100
AT1G28110
AT1G28120
AT1G28130
AT1G28140
AT1G28150
AT1G28190
AT1G28200
AT1G28210
AT1G28240
AT1G28250
AT1G28260
AT1G28280
AT1G28281
AT1G28290
AT1G28310
AT1G28320
AT1G28330
AT1G28340
AT1G28350
AT1G28360
AT1G28370
AT1G28380
AT1G28390
AT1G28395
AT1G28400
AT1G28420
AT1G28410
AT1G28440
AT1G28480
AT1G28490
AT1G28510
AT1G28520
AT1G28530
AT1G28540
AT1G28560
AT1G28570
AT1G28580
AT1G28680
AT1G28685
AT1G28690
AT1G28760
AT1G28960
AT1G29030
AT1G29040
AT1G29041
AT1G29050
AT1G29060
AT1G29070
AT1G29120
AT1G29150
AT1G29160
AT1G29170
AT1G29195
AT1G29220
AT1G29240
AT1G29260
AT1G29250
AT1G29300
AT1G29310
AT1G29320
AT1G29330
AT1G29340
AT1G29350
AT1G29355
AT1G29357
AT1G29370
AT1G29390
AT1G29400
AT1G29410
AT1G29418
AT1G29420
AT1G29465
AT1G29470
AT1G29530
AT1G29550
AT1G29590
AT1G29630
AT1G29640
AT1G29670
AT1G29690
AT1G29700
AT1G29710
AT1G29740
AT1G29750
AT1G29760
AT1G29785
AT1G29790
AT1G29800
AT1G29820
AT1G29810
AT1G29840
AT1G29850
AT1G29880
AT1G29890
AT1G29900
AT1G29910
AT1G29920
AT1G29930
AT1G29940
AT1G29950
AT1G29951
AT1G29952
AT1G29960
AT1G29965
AT1G29970
AT1G29980
AT1G29990
AT1G30000
AT1G30010
AT1G30040
AT1G30070
AT1G30090
AT1G30100
AT1G30120
AT1G30130
AT1G30200
[truncated: 15,040 more rows]

## Sheet: t2 K4
AT1G01010
AT1G01020
AT1G01040
AT1G01050
AT1G01060
AT1G01080
AT1G01090
AT1G01100
AT1G01110
AT1G01120
AT1G01130
AT1G01140
AT1G01150
AT1G01160
AT1G01170
AT1G01180
AT1G01183
AT1G01200
AT1G01210
AT1G01220
AT1G01225
AT1G01230
AT1G01240
AT1G01250
AT1G01260
AT1G01290
AT1G01300
AT1G01310
AT1G01320
AT1G01340
AT1G01350
AT1G01360
AT1G01370
AT1G01420
AT1G01430
AT1G01440
AT1G01448
AT1G01490
AT1G01500
AT1G01510
AT1G01540
AT1G01550
AT1G01570
AT1G01600
AT1G01610
AT1G01620
AT1G01630
AT1G01650
AT1G01680
AT1G01670
AT1G01690
AT1G01700
AT1G01710
AT1G01720
AT1G01725
AT1G01730
AT1G01740
AT1G01760
AT1G01770
AT1G01790
AT1G01800
AT1G01810
AT1G01820
AT1G01830
AT1G01840
AT1G01860
AT1G01870
AT1G01880
AT1G01910
AT1G01920
AT1G01930
AT1G01940
AT1G01950
AT1G01960
AT1G01970
AT1G01990
AT1G02000
AT1G02010
AT1G02020
AT1G02030
AT1G02040
AT1G02050
AT1G02060
AT1G02065
AT1G02080
AT1G02090
AT1G02100
AT1G02120
AT1G02110
AT1G02130
AT1G02140
AT1G02145
AT1G02160
AT1G02170
AT1G02180
AT1G02190
AT1G02150
AT1G02205
AT1G02230
AT1G02260
AT1G02270
AT1G02280
AT1G02290
AT1G02300
AT1G02305
AT1G02330
AT1G02350
AT1G02370
AT1G02380
AT1G02410
AT1G02420
AT1G02450
AT1G02475
AT1G02500
AT1G02530
AT1G02560
AT1G02610
AT1G02640
AT1G02650
AT1G02660
AT1G02670
AT1G02680
AT1G02690
AT1G02720
AT1G02730
AT1G02740
AT1G02750
AT1G02780
AT1G02800
AT1G02810
AT1G02813
AT1G02816
AT1G02840
AT1G02860
AT1G02870
AT1G02880
AT1G02890
AT1G02910
AT1G02960
AT1G02965
AT1G02970
AT1G02990
AT1G03000
AT1G03030
AT1G03040
AT1G03060
AT1G03080
AT1G03090
AT1G03100
AT1G03106
AT1G03110
AT1G03120
AT1G03140
AT1G03130
AT1G03150
AT1G03160
AT1G03170
AT1G03180
AT1G03190
AT1G03200
AT1G03210
AT1G03220
AT1G03230
AT1G03250
AT1G03260
AT1G03270
AT1G03280
AT1G03290
AT1G03300
AT1G03310
AT1G03330
AT1G03350
AT1G03360
AT1G03365
AT1G03370
AT1G03380
AT1G03400
AT1G03410
AT1G03420
AT1G03430
AT1G03440
AT1G03457
AT1G03470
AT1G03475
AT1G03495
AT1G03502
AT1G03506
AT1G03510
AT1G03520
AT1G03530
AT1G03540
AT1G03560
AT1G03570
AT1G03590
AT1G03600
AT1G03610
AT1G03630
AT1G03650
AT1G03687
AT1G03680
AT1G03710
AT1G03730
AT1G03740
AT1G03743
AT1G03746
AT1G03750
AT1G03760
AT1G03770
AT1G03780
AT1G03800
AT1G03830
AT1G03860
AT1G03890
AT1G03900
AT1G03905
AT1G03910
AT1G03930
AT1G03935
AT1G03940
AT1G03950
AT1G03960
AT1G03970
AT1G03980
AT1G03990
AT1G04000
AT1G04020
AT1G04010
AT1G04030
AT1G04040
AT1G04070
AT1G04080
AT1G04050
AT1G04090
AT1G04100
AT1G04120
AT1G04130
AT1G04140
AT1G04150
AT1G04160
AT1G04170
AT1G04190
AT1G04200
AT1G04210
AT1G04220
AT1G04230
AT1G04240
AT1G04250
AT1G04260
AT1G04270
AT1G04280
AT1G04290
AT1G04295
AT1G04300
AT1G04310
AT1G04350
AT1G04340
AT1G04360
AT1G04390
AT1G04400
AT1G04410
AT1G04420
AT1G04430
AT1G04440
AT1G04480
AT1G04510
AT1G04520
AT1G04530
AT1G04540
AT1G04550
AT1G04555
AT1G04570
AT1G04590
AT1G04600
AT1G04620
AT1G04630
AT1G04635
AT1G04640
AT1G04650
AT1G04680
AT1G04690
AT1G04700
AT1G04710
AT1G04730
AT1G04750
AT1G04760
AT1G04770
AT1G04780
AT1G04790
AT1G04810
AT1G04820
AT1G04830
AT1G04840
AT1G04850
AT1G04860
AT1G04870
AT1G04900
AT1G04910
AT1G04930
AT1G04940
AT1G04945
AT1G04950
AT1G04970
AT1G04960
AT1G04980
AT1G04985
AT1G04990
AT1G05000
AT1G05010
AT1G05020
AT1G05030
AT1G05055
AT1G05060
AT1G05065
AT1G05070
AT1G05090
AT1G05100
AT1G05120
AT1G05140
AT1G05150
AT1G05160
AT1G05170
AT1G05180
AT1G05190
AT1G05200
AT1G05205
AT1G05210
AT1G05220
AT1G05230
AT1G05270
AT1G05300
AT1G05320
AT1G05350
AT1G05360
AT1G05370
AT1G05380
AT1G05385
AT1G05390
AT1G05410
AT1G05420
AT1G05430
AT1G05440
AT1G05460
AT1G05470
AT1G05500
AT1G05520
AT1G05560
AT1G05562
AT1G05570
AT1G05575
AT1G05590
AT1G05600
AT1G05620
AT1G05630
AT1G05640
AT1G05670
AT1G05675
AT1G05690
AT1G05710
AT1G05720
AT1G05730
AT1G05750
AT1G05780
AT1G05785
AT1G05790
AT1G05805
AT1G05810
AT1G05820
AT1G05830
AT1G05840
AT1G05850
AT1G05860
AT1G05870
AT1G05890
AT1G05900
AT1G05910
AT1G05940
AT1G05950
AT1G05960
AT1G05970
AT1G06000
AT1G06002
AT1G06010
AT1G06040
AT1G06050
AT1G06060
AT1G06070
AT1G06080
AT1G06110
AT1G06130
AT1G06140
AT1G06149
AT1G06150
AT1G06180
AT1G06190
AT1G06200
AT1G06210
AT1G06220
AT1G06230
AT1G06240
AT1G06270
AT1G06290
AT1G06310
AT1G06380
AT1G06390
AT1G06400
AT1G06410
AT1G06420
AT1G06430
AT1G06440
AT1G06450
AT1G06460
AT1G06470
AT1G06475
AT1G06490
AT1G06500
AT1G06510
AT1G06515
AT1G06530
AT1G06550
AT1G06560
AT1G06570
AT1G06580
AT1G06590
AT1G06620
AT1G06630
AT1G06650
AT1G06660
AT1G06670
AT1G06680
AT1G06690
AT1G06700
AT1G06710
AT1G06730
AT1G06720
AT1G06740
AT1G06750
AT1G06760
AT1G06770
AT1G06780
AT1G06790
AT1G06800
AT1G06820
AT1G06840
AT1G06850
AT1G06870
AT1G06890
AT1G06900
AT1G06910
AT1G06950
AT1G06960
AT1G07000
AT1G07010
AT1G07020
AT1G07030
AT1G07040
AT1G07050
AT1G07060
AT1G07070
AT1G07080
AT1G07090
AT1G07119
AT1G07120
AT1G07110
AT1G07128
AT1G07130
AT1G07135
AT1G07140
AT1G07150
AT1G07170
AT1G07200
AT1G07210
AT1G07220
AT1G07230
AT1G07240
AT1G07250
AT1G07260
AT1G07270
AT1G07280
AT1G07290
AT1G07310
AT1G07320
AT1G07350
AT1G07370
AT1G07360
AT1G07390
AT1G07400
AT1G07410
AT1G07420
AT1G07430
AT1G07440
AT1G07470
AT1G07480
AT1G07485
AT1G07490
AT1G07510
AT1G07520
AT1G07530
AT1G07570
AT1G07590
AT1G07620
AT1G07615
AT1G07630
AT1G07650
AT1G07660
AT1G07670
AT1G07700
AT1G07702
AT1G07705
AT1G07720
AT1G07725
AT1G07728
AT1G07740
AT1G07745
AT1G07750
AT1G07770
AT1G07780
AT1G07790
AT1G07795
AT1G07810
AT1G07820
AT1G07830
AT1G07840
AT1G07870
AT1G07890
AT1G07901
AT1G07910
AT1G07920
AT1G07930
AT1G07940
AT1G07950
AT1G07960
AT1G07970
AT1G07980
AT1G07990
AT1G08000
AT1G08010
AT1G08030
AT1G08040
AT1G08050
AT1G08060
AT1G08070
AT1G08110
AT1G08125
AT1G08130
AT1G08180
AT1G08190
AT1G08200
AT1G08210
AT1G08220
AT1G08230
AT1G08250
AT1G08260
AT1G08270
AT1G08280
AT1G08290
AT1G08300
AT1G08310
AT1G08315
AT1G08350
AT1G08360
AT1G08370
AT1G08380
AT1G08390
AT1G08400
AT1G08410
AT1G08420
AT1G08460
AT1G08450
AT1G08470
AT1G08480
AT1G08490
AT1G08510
AT1G08520
AT1G08530
AT1G08540
AT1G08550
AT1G08560
AT1G08570
AT1G08580
AT1G08590
AT1G08592
AT1G08600
AT1G08610
AT1G08620
AT1G08640
AT1G08650
AT1G08660
AT1G08680
AT1G08700
AT1G08710
AT1G08720
AT1G08730
AT1G08750
AT1G08760
AT1G08770
AT1G08780
AT1G08800
AT1G08820
AT1G08830
AT1G08845
AT1G08840
AT1G08860
AT1G08870
AT1G08880
AT1G08890
AT1G08900
AT1G08910
AT1G08930
AT1G08940
AT1G08960
AT1G08970
AT1G08980
AT1G09000
AT1G09010
AT1G09020
AT1G09040
AT1G09060
AT1G09070
AT1G09100
AT1G09130
AT1G09140
AT1G09150
AT1G09160
AT1G09180
AT1G09190
AT1G09195
AT1G09200
AT1G09210
AT1G09220
AT1G09230
AT1G09250
AT1G09270
AT1G09280
AT1G09290
AT1G09300
AT1G09310
AT1G09320
AT1G09340
AT1G09330
AT1G09390
AT1G09415
AT1G09420
AT1G09421
AT1G09430
AT1G09450
AT1G09470
AT1G09490
AT1G09510
AT1G09520
AT1G09530
AT1G09560
AT1G09570
AT1G09575
AT1G09580
AT1G09590
AT1G09600
AT1G09620
AT1G09630
AT1G09640
AT1G09645
AT1G09650
AT1G09660
AT1G09680
AT1G09690
AT1G09700
AT1G09710
AT1G09730
AT1G09740
AT1G09750
AT1G09760
AT1G09770
AT1G09780
AT1G09794
AT1G09795
AT1G09800
AT1G09810
AT1G09812
AT1G09815
AT1G09820
AT1G09830
AT1G09840
AT1G09850
AT1G09870
AT1G09900
AT1G09910
AT1G09920
AT1G09940
AT1G09950
AT1G09960
AT1G09970
AT1G09980
AT1G10020
AT1G10030
AT1G10050
AT1G10040
AT1G10090
AT1G10095
AT1G10110
AT1G10120
AT1G10130
AT1G10140
AT1G10150
AT1G10170
AT1G10180
AT1G10200
AT1G10210
AT1G10230
AT1G10240
AT1G10270
AT1G10280
AT1G10290
AT1G10310
AT1G10320
AT1G10330
AT1G10350
AT1G10360
AT1G10370
AT1G10390
AT1G10410
AT1G10417
AT1G10430
AT1G10450
AT1G10460
AT1G10470
AT1G10490
AT1G10500
AT1G10510
AT1G10520
AT1G10522
AT1G10530
AT1G10540
AT1G10560
AT1G10570
AT1G10580
AT1G10590
AT1G10600
AT1G10630
AT1G10640
AT1G10650
AT1G10657
AT1G10660
AT1G10670
AT1G10690
AT1G10700
AT1G10710
AT1G10720
AT1G10730
AT1G10740
AT1G10750
AT1G10760
AT1G10780
AT1G10820
AT1G10830
AT1G10840
AT1G10850
AT1G10865
AT1G10870
AT1G10880
AT1G10890
AT1G10900
AT1G10910
AT1G10920
AT1G10930
AT1G10940
AT1G10950
AT1G10960
AT1G10970
AT1G10990
AT1G11000
AT1G11010
AT1G11020
AT1G11050
AT1G11060
AT1G11100
AT1G11090
AT1G11112
AT1G11120
AT1G11125
AT1G11130
AT1G11160
AT1G11170
AT1G11175
AT1G11180
AT1G11200
AT1G11210
AT1G11220
AT1G11240
AT1G11260
AT1G11270
AT1G11280
AT1G11290
AT1G11300
AT1G11310
AT1G11320
AT1G11330
AT1G11360
AT1G11370
AT1G11380
AT1G11390
AT1G11400
AT1G11420
AT1G11430
AT1G11440
AT1G11475
AT1G11480
AT1G11530
AT1G11545
AT1G11592
AT1G11600
AT1G11630
AT1G11640
AT1G11650
AT1G11660
AT1G11670
AT1G11680
AT1G11700
AT1G11710
AT1G11720
AT1G11730
AT1G11735
AT1G11740
AT1G11750
AT1G11755
AT1G11760
AT1G11780
AT1G11790
AT1G11800
AT1G11820
AT1G11840
AT1G11860
AT1G11870
AT1G11880
AT1G11890
AT1G11905
AT1G11900
AT1G11910
AT1G11930
AT1G11940
AT1G11950
AT1G11960
AT1G12000
AT1G12013
AT1G12015
AT1G12020
AT1G12050
AT1G12060
AT1G12090
AT1G12110
AT1G12120
AT1G12140
AT1G12160
AT1G12210
AT1G12230
AT1G12240
AT1G12244
AT1G12250
AT1G12270
AT1G12290
AT1G12294
AT1G12300
AT1G12310
AT1G12330
AT1G12340
AT1G12350
AT1G12360
AT1G12370
AT1G12380
AT1G12390
AT1G12400
AT1G12410
AT1G12420
AT1G12430
AT1G12440
AT1G12450
AT1G12460
AT1G12470
AT1G12500
AT1G12520
AT1G12530
AT1G12550
AT1G12580
AT1G12610
AT1G12620
AT1G12640
AT1G12650
AT1G12680
AT1G12700
AT1G12710
AT1G12730
AT1G12750
AT1G12760
AT1G12770
AT1G12775
AT1G12780
AT1G12790
AT1G12800
AT1G12810
AT1G12820
AT1G12840
AT1G12830
AT1G12845
AT1G12850
AT1G12860
AT1G12880
AT1G12900
AT1G12910
AT1G12920
AT1G12930
AT1G12940
AT1G12970
AT1G12980
AT1G12990
AT1G13000
AT1G13020
AT1G13030
AT1G13040
AT1G13060
AT1G13080
AT1G13090
AT1G13110
AT1G13120
AT1G13140
AT1G13160
AT1G13170
AT1G13180
AT1G13190
AT1G13195
AT1G13210
AT1G13220
AT1G13245
AT1G13250
AT1G13260
AT1G13270
AT1G13280
AT1G13290
AT1G13320
AT1G13330
AT1G13350
AT1G13360
AT1G13380
AT1G13390
AT1G13410
AT1G13440
AT1G13450
AT1G13460
AT1G13560
AT1G13570
AT1G13580
AT1G13600
AT1G13630
AT1G13640
AT1G13690
AT1G13700
AT1G13710
AT1G13730
AT1G13740
AT1G13750
AT1G13770
AT1G13780
AT1G13800
AT1G13810
AT1G13820
AT1G13860
AT1G13870
AT1G13880
AT1G13900
AT1G13910
AT1G13920
AT1G13930
AT1G13940
AT1G13960
AT1G13980
AT1G13990
AT1G14000
AT1G14010
AT1G14020
AT1G14030
AT1G14040
AT1G14060
AT1G14070
AT1G14071
AT1G14130
AT1G14140
AT1G14150
AT1G14170
AT1G14180
AT1G14190
AT1G14200
AT1G14205
AT1G14210
AT1G14230
AT1G14260
AT1G14270
AT1G14290
AT1G14310
AT1G14300
AT1G14320
AT1G14330
AT1G14340
AT1G14345
AT1G14350
AT1G14360
AT1G14370
AT1G14380
AT1G14400
AT1G14410
AT1G14430
AT1G14440
AT1G14450
AT1G14455
AT1G14460
AT1G14470
AT1G14490
AT1G14510
AT1G14530
AT1G14560
AT1G14570
AT1G14590
AT1G14600
AT1G14610
AT1G14620
AT1G14630
AT1G14640
AT1G14650
AT1G14660
AT1G14670
AT1G14680
AT1G14685
AT1G14686
AT1G14687
AT1G14688
AT1G14690
AT1G14710
AT1G14720
AT1G14740
AT1G14750
AT1G14770
AT1G14780
AT1G14790
AT1G14810
AT1G14820
AT1G14830
AT1G14840
AT1G14850
AT1G14890
AT1G14900
AT1G14910
AT1G14920
AT1G14970
AT1G14980
AT1G14990
AT1G15000
AT1G15002
AT1G15020
AT1G15030
AT1G15060
AT1G15080
AT1G15100
AT1G15110
AT1G15120
AT1G15130
AT1G15140
AT1G15165
AT1G15170
AT1G15175
AT1G15180
AT1G15190
AT1G15200
AT1G15215
AT1G15220
AT1G15240
AT1G15230
AT1G15250
AT1G15260
AT1G15270
AT1G15280
AT1G15290
AT1G15300
AT1G15310
AT1G15320
AT1G15330
AT1G15340
AT1G15350
AT1G15370
AT1G15390
AT1G15400
AT1G15405
AT1G15410
AT1G15420
AT1G15430
AT1G15440
AT1G15470
AT1G15480
AT1G15490
AT1G15500
AT1G15510
AT1G15520
AT1G15530
AT1G15570
AT1G15660
AT1G15670
AT1G15690
AT1G15700
AT1G15710
AT1G15720
AT1G15730
AT1G15740
AT1G15750
AT1G15760
AT1G15770
AT1G15780
AT1G15800
AT1G15810
AT1G15820
AT1G15825
AT1G15830
AT1G15860
AT1G15870
AT1G15880
AT1G15900
AT1G15910
AT1G15920
AT1G15930
AT1G15940
AT1G15950
AT1G15980
AT1G15970
AT1G16000
AT1G16010
AT1G16020
AT1G16030
AT1G16040
AT1G16060
AT1G16070
AT1G16080
AT1G16110
AT1G16170
AT1G16180
AT1G16190
AT1G16210
AT1G16220
AT1G16240
AT1G16250
AT1G16270
AT1G16280
AT1G16290
AT1G16300
AT1G16320
AT1G16330
AT1G16340
AT1G16350
AT1G16430
AT1G16440
AT1G16445
AT1G16470
AT1G16460
AT1G16480
AT1G16489
AT1G16490
AT1G16500
AT1G16510
AT1G16515
AT1G16520
AT1G16540
AT1G16560
AT1G16570
AT1G16590
AT1G16610
AT1G16630
AT1G16635
AT1G16640
AT1G16650
AT1G16670
AT1G16680
AT1G16690
AT1G16700
AT1G16710
AT1G16720
AT1G16730
AT1G16740
AT1G16750
AT1G16770
AT1G16780
AT1G16790
AT1G16810
AT1G16800
AT1G16820
AT1G16825
AT1G16830
AT1G16840
AT1G16858
AT1G16860
AT1G16870
AT1G16880
AT1G16890
AT1G16900
AT1G16916
AT1G16920
AT1G16930
AT1G16970
AT1G17030
AT1G17040
AT1G17050
AT1G17070
AT1G17080
AT1G17090
AT1G17100
AT1G17110
AT1G17120
AT1G17130
AT1G17140
AT1G17145
AT1G17147
AT1G17160
AT1G17170
AT1G17200
AT1G17220
AT1G17210
AT1G17230
AT1G17235
AT1G17240
AT1G17250
AT1G17255
AT1G17270
AT1G17280
AT1G17290
AT1G17330
AT1G17340
AT1G17350
AT1G17360
AT1G17370
AT1G17380
AT1G17410
AT1G17420
AT1G17430
AT1G17440
AT1G17455
AT1G17450
AT1G17460
AT1G17470
AT1G17480
AT1G17490
AT1G17500
AT1G17510
AT1G17520
AT1G17530
AT1G17550
AT1G17560
AT1G17570
AT1G17580
AT1G17590
AT1G17620
AT1G17630
AT1G17640
AT1G17650
AT1G17665
AT1G17670
AT1G17680
AT1G17690
AT1G17720
AT1G17730
AT1G17744
AT1G17745
AT1G17750
AT1G17760
AT1G17780
AT1G17790
AT1G17820
AT1G17830
AT1G17840
AT1G17850
AT1G17860
AT1G17870
AT1G17880
AT1G17890
AT1G17920
AT1G17930
AT1G17940
AT1G17970
AT1G17980
AT1G18000
AT1G18010
AT1G18030
AT1G18040
AT1G18060
AT1G18070
AT1G18075
AT1G18080
AT1G18090
AT1G18140
AT1G18150
AT1G18160
AT1G18170
AT1G18180
AT1G18190
AT1G18210
AT1G18250
AT1G18260
AT1G18265
AT1G18280
AT1G18270
AT1G18290
AT1G18300
AT1G18320
AT1G18330
AT1G18335
AT1G18340
AT1G18360
AT1G18370
AT1G18382
AT1G18390
AT1G18410
AT1G18415
AT1G18420
AT1G18430
AT1G18440
AT1G18450
AT1G18460
AT1G18470
AT1G18480
AT1G18485
AT1G18490
AT1G18500
AT1G18540
AT1G18550
AT1G18560
AT1G18580
AT1G18600
AT1G18610
AT1G18620
AT1G18630
AT1G18640
AT1G18650
AT1G18660
AT1G18670
AT1G18680
AT1G18690
AT1G18700
AT1G18720
AT1G18730
AT1G18740
AT1G18745
AT1G18750
AT1G18773
AT1G18800
AT1G18840
AT1G18850
AT1G18890
AT1G18900
AT1G18910
AT1G18940
AT1G18950
AT1G19000
AT1G19010
AT1G19020
AT1G19025
AT1G19050
AT1G19070
AT1G19080
AT1G19100
AT1G19110
AT1G19120
AT1G19130
AT1G19140
AT1G19150
AT1G19170
AT1G19180
AT1G19190
AT1G19200
AT1G19210
AT1G19220
AT1G19240
AT1G19250
AT1G19270
AT1G19290
AT1G19300
AT1G19310
AT1G19330
AT1G19340
AT1G19350
AT1G19360
AT1G19370
AT1G19373
AT1G19376
AT1G19380
AT1G19400
AT1G19410
AT1G19430
AT1G19440
AT1G19450
AT1G19480
AT1G19485
AT1G19490
AT1G19520
AT1G19540
AT1G19570
AT1G19580
AT1G19600
AT1G19630
AT1G19650
AT1G19660
AT1G19670
AT1G19680
AT1G19690
AT1G19700
AT1G19710
AT1G19720
AT1G19730
AT1G19740
AT1G19750
AT1G19770
AT1G19780
AT1G19790
AT1G19800
AT1G19830
AT1G19835
AT1G19840
AT1G19850
AT1G19860
AT1G19870
AT1G19880
AT1G19910
AT1G19920
AT1G19950
AT1G19970
AT1G19980
AT1G19990
AT1G20010
AT1G20015
AT1G20020
AT1G20030
AT1G20050
AT1G20060
AT1G20065
AT1G20090
AT1G20100
AT1G20110
AT1G20140
AT1G20200
AT1G20220
AT1G20225
AT1G20230
AT1G20260
AT1G20270
AT1G20300
AT1G20290
AT1G20310
AT1G20330
AT1G20340
AT1G20370
AT1G20380
AT1G20410
AT1G20420
AT1G20430
AT1G20440
AT1G20450
AT1G20460
AT1G20480
AT1G20490
AT1G20510
AT1G20515
AT1G20530
AT1G20540
AT1G20550
AT1G20560
AT1G20570
AT1G20575
AT1G20580
AT1G20610
AT1G20620
AT1G20630
AT1G20640
AT1G20650
AT1G20670
AT1G20693
AT1G20690
AT1G20691
AT1G20696
AT1G20720
AT1G20760
AT1G20770
AT1G20780
AT1G20810
AT1G20816
AT1G20823
AT1G20820
AT1G20830
AT1G20840
AT1G20875
AT1G20880
AT1G20890
AT1G20910
AT1G20920
AT1G20930
AT1G20950
AT1G20960
AT1G20970
AT1G20980
AT1G21000
AT1G21010
AT1G21050
AT1G21060
AT1G21065
AT1G21070
AT1G21080
AT1G21090
AT1G21150
AT1G21160
AT1G21170
AT1G21190
AT1G21200
AT1G21220
AT1G21250
AT1G21260
AT1G21270
AT1G21280
AT1G21281
AT1G21310
AT1G21320
AT1G21350
AT1G21370
AT1G21390
AT1G21380
AT1G21400
AT1G21410
AT1G21440
AT1G21450
AT1G21460
AT1G21480
AT1G21500
AT1G21520
AT1G21560
AT1G21580
AT1G21590
AT1G21600
AT1G21610
AT1G21630
AT1G21640
AT1G21650
AT1G21651
AT1G21660
AT1G21670
AT1G21680
AT1G21690
AT1G21695
AT1G21700
AT1G21710
AT1G21720
AT1G21730
AT1G21740
AT1G21750
AT1G21760
AT1G21770
AT1G21780
AT1G21790
AT1G21810
AT1G21830
AT1G21840
AT1G21880
AT1G21900
AT1G21920
AT1G21930
AT1G21950
AT1G21980
AT1G22020
AT1G22030
AT1G22040
AT1G22050
AT1G22060
AT1G22070
AT1G22140
AT1G22160
AT1G22170
AT1G22180
AT1G22190
AT1G22200
AT1G22220
AT1G22250
AT1G22260
AT1G22270
AT1G22275
AT1G22280
AT1G22300
AT1G22310
AT1G22330
AT1G22403
AT1G22410
AT1G22430
AT1G22450
AT1G22470
AT1G22480
AT1G22490
AT1G22510
AT1G22520
AT1G22530
AT1G22540
AT1G22550
AT1G22600
AT1G22610
AT1G22620
AT1G22630
AT1G22640
AT1G22660
AT1G22700
AT1G22730
AT1G22740
AT1G22750
AT1G22770
AT1G22780
AT1G22790
AT1G22800
AT1G22810
AT1G22830
AT1G22840
AT1G22850
AT1G22860
AT1G22870
AT1G22880
AT1G22882
AT1G22920
AT1G22930
AT1G22940
AT1G22950
AT1G22960
AT1G22970
AT1G22985
AT1G23000
AT1G23020
AT1G23030
AT1G23050
AT1G23052
AT1G23080
AT1G23090
AT1G23100
AT1G23140
AT1G23170
AT1G23180
AT1G23190
AT1G23205
AT1G23220
AT1G23230
AT1G23260
AT1G23280
AT1G23290
AT1G23300
AT1G23310
AT1G23330
AT1G23340
AT1G23360
AT1G23380
AT1G23390
AT1G23400
AT1G23410
AT1G23440
AT1G23465
AT1G23480
AT1G23490
AT1G23550
AT1G23710
AT1G23740
AT1G23750
AT1G23780
AT1G23790
AT1G23820
AT1G23860
AT1G23870
AT1G23880
AT1G23890
AT1G23900
AT1G23935
AT1G23950
AT1G23960
AT1G23965
AT1G23970
AT1G23980
AT1G24020
AT1G24040
AT1G24050
AT1G24090
AT1G24095
AT1G24100
AT1G24120
AT1G24140
AT1G24150
AT1G24160
AT1G24170
AT1G24180
AT1G24190
AT1G24210
AT1G24240
AT1G24265
AT1G24267
AT1G24280
AT1G24290
AT1G24300
AT1G24310
AT1G24330
AT1G24340
AT1G24350
AT1G24360
AT1G24440
AT1G24450
AT1G24460
AT1G24490
AT1G24510
AT1G24530
AT1G24560
AT1G24610
AT1G24625
AT1G24706
AT1G24764
AT1G24793
AT1G24880
AT1G25054
AT1G25145
AT1G25210
AT1G25220
AT1G25260
AT1G25275
AT1G25280
AT1G25290
AT1G25320
AT1G25350
AT1G25360
AT1G25370
AT1G25375
AT1G25380
AT1G25390
AT1G25400
AT1G25420
AT1G25440
AT1G25450
AT1G25470
AT1G25472
AT1G25480
AT1G25490
AT1G25500
AT1G25510
AT1G25520
AT1G25530
AT1G25540
AT1G25550
AT1G25560
AT1G25570
AT1G25580
AT1G25682
AT1G26090
AT1G26100
AT1G26110
AT1G26120
AT1G26130
AT1G26150
AT1G26160
AT1G26170
AT1G26180
AT1G26190
AT1G26218
AT1G26220
AT1G26230
AT1G26235
AT1G26260
AT1G26270
AT1G26300
AT1G26310
AT1G26330
AT1G26340
AT1G26370
AT1G26440
AT1G26460
AT1G26470
AT1G26500
AT1G26520
AT1G26530
AT1G26540
AT1G26550
AT1G26560
AT1G26570
AT1G26580
AT1G26600
AT1G26620
AT1G26630
AT1G26650
AT1G26660
AT1G26640
AT1G26665
AT1G26670
AT1G26690
AT1G26740
AT1G26750
AT1G26760
AT1G26761
AT1G26770
AT1G26780
AT1G26800
AT1G26810
AT1G26830
AT1G26840
AT1G26850
AT1G26880
AT1G26900
AT1G26910
AT1G26930
AT1G26940
AT1G26960
AT1G27000
AT1G27050
AT1G27060
AT1G27070
AT1G27090
AT1G27100
AT1G27110
AT1G27120
AT1G27130
AT1G27140
AT1G27150
AT1G27170
AT1G27190
AT1G27200
AT1G27210
AT1G27290
AT1G27300
AT1G27310
AT1G27320
AT1G27330
AT1G27340
AT1G27350
AT1G27360
AT1G27370
AT1G27385
AT1G27390
AT1G27400
AT1G27410
AT1G27430
AT1G27435
AT1G27440
AT1G27450
AT1G27460
AT1G27470
AT1G27480
AT1G27500
AT1G27510
AT1G27520
AT1G27530
AT1G27570
AT1G27590
AT1G27600
AT1G27620
AT1G27630
AT1G27640
AT1G27650
AT1G27660
AT1G27680
AT1G27690
AT1G27695
AT1G27700
AT1G27720
AT1G27730
AT1G27750
AT1G27752
AT1G27760
AT1G27770
AT1G27820
AT1G27840
AT1G27850
AT1G27880
AT1G27890
AT1G27900
AT1G27910
AT1G27920
AT1G27921
AT1G27930
AT1G27950
AT1G27960
AT1G27970
AT1G27980
AT1G28050
AT1G28060
AT1G28070
AT1G28090
AT1G28100
AT1G28110
AT1G28120
AT1G28130
AT1G28140
AT1G28150
AT1G28190
AT1G28200
AT1G28210
AT1G28240
AT1G28250
AT1G28260
AT1G28280
AT1G28281
AT1G28290
AT1G28310
AT1G28320
AT1G28330
AT1G28340
AT1G28350
AT1G28360
AT1G28370
AT1G28380
AT1G28390
AT1G28395
AT1G28400
AT1G28420
AT1G28410
AT1G28440
AT1G28480
AT1G28490
AT1G28510
AT1G28520
AT1G28530
AT1G28540
AT1G28560
AT1G28580
AT1G28680
AT1G28685
AT1G28690
AT1G28760
AT1G28960
AT1G29030
AT1G29040
AT1G29041
AT1G29050
AT1G29060
AT1G29070
AT1G29120
AT1G29150
AT1G29160
AT1G29170
AT1G29195
AT1G29220
AT1G29240
AT1G29260
AT1G29250
AT1G29300
AT1G29310
AT1G29320
AT1G29330
AT1G29340
AT1G29350
AT1G29355
AT1G29357
AT1G29370
AT1G29390
AT1G29400
AT1G29410
AT1G29418
AT1G29420
AT1G29465
AT1G29470
AT1G29530
AT1G29550
AT1G29590
AT1G29630
AT1G29640
AT1G29670
AT1G29690
AT1G29700
AT1G29710
AT1G29740
AT1G29750
AT1G29760
AT1G29785
AT1G29790
AT1G29800
AT1G29820
AT1G29810
AT1G29840
AT1G29850
AT1G29880
AT1G29890
AT1G29900
AT1G29910
AT1G29920
AT1G29930
AT1G29940
AT1G29950
AT1G29951
AT1G29952
AT1G29960
AT1G29965
AT1G29970
AT1G29980
AT1G29990
AT1G30000
AT1G30010
AT1G30040
AT1G30070
AT1G30090
AT1G30100
AT1G30110
AT1G30120
AT1G30130
AT1G30200
AT1G30210
AT1G30230
AT1G30240
AT1G30260
[truncated: 15,088 more rows]

## Sheet: I K4
AT1G01010
AT1G01020
AT1G01030
AT1G01040
AT1G01050
AT1G01080
AT1G01090
AT1G01100
AT1G01110
AT1G01120
AT1G01130
AT1G01140
AT1G01160
AT1G01170
AT1G01180
AT1G01200
AT1G01210
AT1G01220
AT1G01225
AT1G01230
AT1G01240
AT1G01250
AT1G01260
AT1G01290
AT1G01300
AT1G01310
AT1G01320
AT1G01340
AT1G01350
AT1G01360
AT1G01370
AT1G01420
AT1G01430
AT1G01440
AT1G01448
AT1G01470
AT1G01490
AT1G01500
AT1G01510
AT1G01540
AT1G01550
AT1G01560
AT1G01570
AT1G01600
AT1G01610
AT1G01620
AT1G01630
AT1G01650
AT1G01670
AT1G01690
AT1G01710
AT1G01720
AT1G01725
AT1G01730
AT1G01740
AT1G01760
AT1G01770
AT1G01790
AT1G01800
AT1G01810
AT1G01820
AT1G01830
AT1G01840
AT1G01860
AT1G01870
AT1G01880
AT1G01900
AT1G01910
AT1G01920
AT1G01930
AT1G01940
AT1G01950
AT1G01960
AT1G01970
AT1G01990
AT1G02000
AT1G02010
AT1G02020
AT1G02060
AT1G02065
AT1G02080
AT1G02090
AT1G02100
AT1G02110
AT1G02120
AT1G02130
AT1G02140
AT1G02145
AT1G02150
AT1G02160
AT1G02170
AT1G02180
AT1G02190
AT1G02205
AT1G02220
AT1G02260
AT1G02270
AT1G02280
AT1G02290
AT1G02300
AT1G02305
AT1G02330
AT1G02350
AT1G02370
AT1G02380
AT1G02410
AT1G02420
AT1G02450
AT1G02475
AT1G02500
AT1G02560
AT1G02610
AT1G02640
AT1G02650
AT1G02660
AT1G02670
AT1G02680
AT1G02690
AT1G02720
AT1G02730
AT1G02740
AT1G02750
AT1G02780
AT1G02800
AT1G02810
AT1G02813
AT1G02816
AT1G02840
AT1G02860
AT1G02870
AT1G02880
AT1G02890
AT1G02910
AT1G02960
AT1G02970
AT1G02990
AT1G03000
AT1G03030
AT1G03040
AT1G03060
AT1G03080
AT1G03090
AT1G03100
AT1G03110
AT1G03120
AT1G03130
AT1G03140
AT1G03150
AT1G03160
AT1G03180
AT1G03190
AT1G03200
AT1G03210
AT1G03220
AT1G03230
AT1G03250
AT1G03260
AT1G03270
AT1G03280
AT1G03290
AT1G03300
AT1G03310
AT1G03330
AT1G03340
AT1G03350
AT1G03360
AT1G03365
AT1G03370
AT1G03380
AT1G03400
AT1G03410
AT1G03420
AT1G03430
AT1G03440
AT1G03457
AT1G03470
AT1G03475
AT1G03502
AT1G03506
AT1G03510
AT1G03520
AT1G03530
AT1G03540
AT1G03560
AT1G03570
AT1G03590
AT1G03600
AT1G03610
AT1G03630
AT1G03650
AT1G03680
AT1G03687
AT1G03710
AT1G03730
AT1G03740
AT1G03743
AT1G03746
AT1G03750
AT1G03760
AT1G03770
AT1G03800
AT1G03830
AT1G03860
AT1G03870
AT1G03900
AT1G03905
AT1G03910
AT1G03930
AT1G03935
AT1G03940
AT1G03950
AT1G03960
AT1G03970
AT1G03980
AT1G03990
AT1G04000
AT1G04010
AT1G04020
AT1G04030
AT1G04040
AT1G04050
AT1G04070
AT1G04080
AT1G04090
AT1G04100
AT1G04120
AT1G04130
AT1G04140
AT1G04160
AT1G04170
AT1G04190
AT1G04200
AT1G04210
AT1G04220
AT1G04230
AT1G04240
AT1G04260
AT1G04270
AT1G04280
AT1G04290
AT1G04295
AT1G04300
AT1G04310
AT1G04340
AT1G04350
AT1G04360
AT1G04390
AT1G04400
AT1G04410
AT1G04420
AT1G04430
AT1G04440
AT1G04480
AT1G04510
AT1G04520
AT1G04530
AT1G04540
AT1G04550
AT1G04555
AT1G04570
AT1G04590
AT1G04600
AT1G04620
AT1G04630
AT1G04635
AT1G04640
AT1G04650
AT1G04680
AT1G04690
AT1G04710
AT1G04730
AT1G04750
AT1G04760
AT1G04770
AT1G04780
AT1G04790
AT1G04810
AT1G04820
AT1G04830
AT1G04840
AT1G04850
AT1G04860
AT1G04870
AT1G04900
AT1G04910
AT1G04930
AT1G04940
AT1G04945
AT1G04950
AT1G04960
AT1G04970
AT1G04980
AT1G04985
AT1G04990
AT1G05000
AT1G05010
AT1G05020
AT1G05030
AT1G05055
AT1G05060
AT1G05065
AT1G05070
AT1G05090
AT1G05100
AT1G05120
AT1G05140
AT1G05150
AT1G05160
AT1G05170
AT1G05180
AT1G05190
AT1G05200
AT1G05205
AT1G05210
AT1G05270
AT1G05300
AT1G05350
AT1G05360
AT1G05370
AT1G05380
AT1G05385
AT1G05390
AT1G05410
AT1G05420
AT1G05430
AT1G05440
AT1G05460
AT1G05470
AT1G05500
AT1G05520
AT1G05540
AT1G05560
AT1G05562
AT1G05570
AT1G05590
AT1G05600
AT1G05620
AT1G05630
AT1G05640
AT1G05670
AT1G05675
AT1G05680
AT1G05690
AT1G05710
AT1G05720
AT1G05730
AT1G05750
AT1G05780
AT1G05785
AT1G05790
AT1G05805
AT1G05810
AT1G05830
AT1G05840
AT1G05850
AT1G05860
AT1G05870
AT1G05890
AT1G05900
AT1G05910
AT1G05940
AT1G05950
AT1G05960
AT1G05970
AT1G06000
AT1G06002
AT1G06010
AT1G06040
AT1G06050
AT1G06060
AT1G06070
AT1G06110
AT1G06130
AT1G06140
AT1G06149
AT1G06150
AT1G06180
AT1G06190
AT1G06200
AT1G06210
AT1G06220
AT1G06230
AT1G06240
AT1G06270
AT1G06290
AT1G06310
AT1G06380
AT1G06390
AT1G06400
AT1G06410
AT1G06420
AT1G06430
AT1G06440
AT1G06450
AT1G06460
AT1G06470
AT1G06475
AT1G06490
AT1G06500
AT1G06510
AT1G06515
AT1G06530
AT1G06550
AT1G06560
AT1G06570
AT1G06580
AT1G06590
AT1G06620
AT1G06630
AT1G06645
AT1G06650
AT1G06660
AT1G06670
AT1G06680
AT1G06690
AT1G06700
AT1G06710
AT1G06720
AT1G06730
AT1G06740
AT1G06750
AT1G06760
AT1G06770
AT1G06780
AT1G06790
AT1G06800
AT1G06820
AT1G06840
AT1G06850
AT1G06870
AT1G06890
AT1G06900
AT1G06910
AT1G06950
AT1G06960
AT1G07000
AT1G07010
AT1G07020
AT1G07030
AT1G07040
AT1G07050
AT1G07060
AT1G07070
AT1G07080
AT1G07090
AT1G07110
AT1G07119
AT1G07120
AT1G07128
AT1G07130
AT1G07135
AT1G07140
AT1G07150
AT1G07170
AT1G07200
AT1G07210
AT1G07220
AT1G07230
AT1G07240
AT1G07250
AT1G07260
AT1G07270
AT1G07280
AT1G07290
AT1G07310
AT1G07320
AT1G07350
AT1G07360
AT1G07370
AT1G07390
AT1G07400
AT1G07410
AT1G07420
AT1G07430
AT1G07440
AT1G07470
AT1G07480
AT1G07485
AT1G07490
AT1G07510
AT1G07520
AT1G07530
AT1G07570
AT1G07590
AT1G07615
AT1G07620
AT1G07630
AT1G07650
AT1G07660
AT1G07670
AT1G07700
AT1G07702
AT1G07705
AT1G07720
AT1G07725
AT1G07728
AT1G07740
AT1G07745
AT1G07750
AT1G07770
AT1G07780
AT1G07790
AT1G07810
AT1G07820
AT1G07830
AT1G07840
AT1G07870
AT1G07890
AT1G07901
AT1G07910
AT1G07920
AT1G07930
AT1G07940
AT1G07950
AT1G07960
AT1G07970
AT1G07980
AT1G07990
AT1G08000
AT1G08005
AT1G08010
AT1G08030
AT1G08040
AT1G08050
AT1G08060
AT1G08070
AT1G08110
AT1G08125
AT1G08130
AT1G08180
AT1G08190
AT1G08200
AT1G08210
AT1G08220
AT1G08230
AT1G08250
AT1G08260
AT1G08270
AT1G08280
AT1G08290
AT1G08300
AT1G08310
AT1G08315
AT1G08350
AT1G08360
AT1G08370
AT1G08380
AT1G08390
AT1G08400
AT1G08410
AT1G08420
AT1G08450
AT1G08460
AT1G08470
AT1G08480
AT1G08490
AT1G08510
AT1G08520
AT1G08530
AT1G08540
AT1G08550
AT1G08570
AT1G08580
AT1G08590
AT1G08592
AT1G08600
AT1G08610
AT1G08620
AT1G08640
AT1G08650
AT1G08660
AT1G08680
AT1G08700
AT1G08710
AT1G08720
AT1G08730
AT1G08750
AT1G08760
AT1G08770
AT1G08780
AT1G08800
AT1G08820
AT1G08830
AT1G08840
AT1G08845
AT1G08870
AT1G08880
AT1G08890
AT1G08900
AT1G08910
AT1G08920
AT1G08930
AT1G08940
AT1G08960
AT1G08970
AT1G08980
AT1G09000
AT1G09010
AT1G09020
AT1G09040
AT1G09060
AT1G09070
AT1G09100
AT1G09130
AT1G09140
AT1G09150
AT1G09160
AT1G09190
AT1G09195
AT1G09200
AT1G09210
AT1G09220
AT1G09230
AT1G09250
AT1G09270
AT1G09280
AT1G09290
AT1G09300
AT1G09320
AT1G09330
AT1G09340
AT1G09390
AT1G09415
AT1G09420
AT1G09421
AT1G09430
AT1G09440
AT1G09460
AT1G09470
AT1G09490
AT1G09520
AT1G09530
AT1G09560
AT1G09570
AT1G09575
AT1G09580
AT1G09590
AT1G09600
AT1G09620
AT1G09630
AT1G09640
AT1G09645
AT1G09650
AT1G09660
AT1G09680
AT1G09690
AT1G09700
AT1G09710
AT1G09730
AT1G09740
AT1G09750
AT1G09760
AT1G09770
AT1G09780
AT1G09794
AT1G09795
AT1G09800
AT1G09810
AT1G09812
AT1G09815
AT1G09820
AT1G09830
AT1G09840
AT1G09850
AT1G09870
AT1G09900
AT1G09910
AT1G09920
AT1G09940
AT1G09950
AT1G09960
AT1G09970
AT1G09980
AT1G10020
AT1G10030
AT1G10040
AT1G10050
AT1G10060
AT1G10090
AT1G10095
AT1G10110
AT1G10120
AT1G10130
AT1G10140
AT1G10150
AT1G10170
AT1G10180
AT1G10200
AT1G10210
AT1G10230
AT1G10240
AT1G10270
AT1G10280
AT1G10290
AT1G10310
AT1G10320
AT1G10330
AT1G10350
AT1G10360
AT1G10370
AT1G10390
AT1G10410
AT1G10417
AT1G10430
AT1G10450
AT1G10460
AT1G10470
AT1G10490
AT1G10500
AT1G10510
AT1G10520
AT1G10522
AT1G10560
AT1G10570
AT1G10580
AT1G10590
AT1G10600
AT1G10630
AT1G10640
AT1G10650
AT1G10657
AT1G10660
AT1G10670
AT1G10690
AT1G10700
AT1G10710
AT1G10720
AT1G10730
AT1G10740
AT1G10750
AT1G10760
AT1G10780
AT1G10820
AT1G10830
AT1G10840
AT1G10850
AT1G10865
AT1G10870
AT1G10890
AT1G10900
AT1G10910
AT1G10920
AT1G10930
AT1G10940
AT1G10950
AT1G10960
AT1G10970
AT1G11000
AT1G11010
AT1G11020
AT1G11050
AT1G11060
AT1G11090
AT1G11100
AT1G11112
AT1G11120
AT1G11125
AT1G11130
AT1G11160
AT1G11175
AT1G11180
AT1G11200
AT1G11210
AT1G11220
AT1G11240
AT1G11260
AT1G11270
AT1G11280
AT1G11290
AT1G11300
AT1G11310
AT1G11320
AT1G11330
AT1G11350
AT1G11360
AT1G11380
AT1G11390
AT1G11400
AT1G11410
AT1G11420
AT1G11430
AT1G11440
AT1G11475
AT1G11480
AT1G11530
AT1G11545
AT1G11592
AT1G11600
AT1G11630
AT1G11640
AT1G11650
AT1G11660
AT1G11670
AT1G11680
AT1G11700
AT1G11710
AT1G11720
AT1G11750
AT1G11755
AT1G11760
AT1G11780
AT1G11790
AT1G11800
AT1G11820
AT1G11840
AT1G11860
AT1G11870
AT1G11880
AT1G11890
AT1G11900
AT1G11905
AT1G11910
AT1G11930
AT1G11940
AT1G11950
AT1G11960
AT1G12000
AT1G12013
AT1G12015
AT1G12020
AT1G12050
AT1G12060
AT1G12080
AT1G12090
AT1G12110
AT1G12120
AT1G12140
AT1G12210
AT1G12230
AT1G12240
AT1G12244
AT1G12250
AT1G12270
AT1G12280
AT1G12290
AT1G12294
AT1G12300
AT1G12310
AT1G12320
AT1G12330
AT1G12350
AT1G12360
AT1G12370
AT1G12380
AT1G12390
AT1G12400
AT1G12410
AT1G12420
AT1G12430
AT1G12440
AT1G12450
AT1G12460
AT1G12470
AT1G12500
AT1G12520
AT1G12530
AT1G12550
AT1G12570
AT1G12580
AT1G12610
AT1G12620
AT1G12640
AT1G12650
AT1G12680
AT1G12700
AT1G12710
AT1G12730
AT1G12750
AT1G12760
AT1G12770
AT1G12775
AT1G12780
AT1G12790
AT1G12800
AT1G12810
AT1G12820
AT1G12830
AT1G12840
AT1G12845
AT1G12850
AT1G12860
AT1G12900
AT1G12910
AT1G12920
AT1G12930
AT1G12970
AT1G12990
AT1G13000
AT1G13020
AT1G13030
AT1G13040
AT1G13060
AT1G13080
AT1G13090
AT1G13120
AT1G13140
AT1G13160
AT1G13170
AT1G13180
AT1G13190
AT1G13195
AT1G13210
AT1G13220
AT1G13245
AT1G13250
AT1G13260
AT1G13270
AT1G13280
AT1G13320
AT1G13330
AT1G13350
AT1G13360
AT1G13380
AT1G13390
AT1G13410
AT1G13440
AT1G13450
AT1G13460
AT1G13560
AT1G13570
AT1G13580
AT1G13630
AT1G13640
AT1G13690
AT1G13730
AT1G13740
AT1G13750
AT1G13770
AT1G13780
AT1G13800
AT1G13810
AT1G13820
AT1G13860
AT1G13870
AT1G13880
AT1G13900
AT1G13910
AT1G13920
AT1G13930
AT1G13940
AT1G13960
AT1G13980
AT1G13990
AT1G14000
AT1G14010
AT1G14020
AT1G14030
AT1G14040
AT1G14060
AT1G14070
AT1G14071
AT1G14130
AT1G14140
AT1G14150
AT1G14170
AT1G14180
AT1G14190
AT1G14200
AT1G14205
AT1G14230
AT1G14270
AT1G14280
AT1G14290
AT1G14300
AT1G14310
AT1G14320
AT1G14330
AT1G14340
AT1G14345
AT1G14350
AT1G14360
AT1G14370
AT1G14380
AT1G14400
AT1G14410
AT1G14430
AT1G14440
AT1G14450
AT1G14460
AT1G14470
AT1G14490
AT1G14510
AT1G14530
AT1G14560
AT1G14570
AT1G14580
AT1G14590
AT1G14610
AT1G14620
AT1G14640
AT1G14650
AT1G14660
AT1G14670
AT1G14680
AT1G14685
AT1G14687
AT1G14690
AT1G14710
AT1G14720
AT1G14740
AT1G14750
AT1G14770
AT1G14780
AT1G14790
AT1G14810
AT1G14820
AT1G14830
AT1G14840
AT1G14850
AT1G14890
AT1G14900
AT1G14910
AT1G14920
AT1G14970
AT1G14980
AT1G14990
AT1G15000
AT1G15002
AT1G15020
AT1G15030
AT1G15060
AT1G15080
AT1G15100
AT1G15110
AT1G15120
AT1G15130
AT1G15140
AT1G15165
AT1G15170
AT1G15175
AT1G15180
AT1G15190
AT1G15200
AT1G15215
AT1G15220
AT1G15230
AT1G15240
AT1G15250
AT1G15260
AT1G15270
AT1G15280
AT1G15290
AT1G15300
AT1G15310
AT1G15340
AT1G15360
AT1G15370
AT1G15390
AT1G15400
AT1G15410
AT1G15420
AT1G15430
AT1G15440
AT1G15470
AT1G15480
AT1G15490
AT1G15500
AT1G15510
AT1G15520
AT1G15530
AT1G15570
AT1G15660
AT1G15670
AT1G15690
AT1G15700
AT1G15710
AT1G15720
AT1G15730
AT1G15740
AT1G15750
AT1G15760
AT1G15780
AT1G15800
AT1G15810
AT1G15820
AT1G15825
AT1G15830
AT1G15860
AT1G15870
AT1G15900
AT1G15910
AT1G15920
AT1G15930
AT1G15940
AT1G15950
AT1G15970
AT1G15980
AT1G16000
AT1G16010
AT1G16020
AT1G16030
AT1G16040
AT1G16060
AT1G16070
AT1G16080
AT1G16110
AT1G16170
AT1G16180
AT1G16190
AT1G16210
AT1G16220
AT1G16240
AT1G16250
AT1G16260
AT1G16270
AT1G16280
AT1G16290
AT1G16300
AT1G16320
AT1G16340
AT1G16350
AT1G16430
AT1G16440
AT1G16445
AT1G16460
AT1G16470
AT1G16480
AT1G16489
AT1G16490
AT1G16500
AT1G16510
AT1G16515
AT1G16520
AT1G16540
AT1G16560
AT1G16570
AT1G16590
AT1G16610
AT1G16630
AT1G16635
AT1G16640
AT1G16650
AT1G16670
AT1G16680
AT1G16690
AT1G16700
AT1G16710
AT1G16720
AT1G16730
AT1G16740
AT1G16750
AT1G16770
AT1G16780
AT1G16790
AT1G16800
AT1G16810
AT1G16820
AT1G16825
AT1G16830
AT1G16840
AT1G16858
AT1G16860
AT1G16870
AT1G16880
AT1G16890
AT1G16900
AT1G16910
AT1G16916
AT1G16920
AT1G16930
AT1G16970
AT1G17030
AT1G17040
AT1G17050
AT1G17070
AT1G17080
AT1G17090
AT1G17100
AT1G17110
AT1G17120
AT1G17130
AT1G17140
AT1G17145
AT1G17147
AT1G17160
AT1G17170
AT1G17190
AT1G17200
AT1G17210
AT1G17220
AT1G17230
AT1G17235
AT1G17240
AT1G17250
AT1G17255
AT1G17270
AT1G17280
AT1G17290
AT1G17330
AT1G17340
AT1G17350
AT1G17360
AT1G17370
AT1G17380
AT1G17410
AT1G17420
AT1G17430
AT1G17440
AT1G17450
AT1G17455
AT1G17460
AT1G17470
AT1G17480
AT1G17490
AT1G17500
AT1G17510
AT1G17520
AT1G17530
AT1G17550
AT1G17560
AT1G17570
AT1G17580
AT1G17590
AT1G17600
AT1G17610
AT1G17620
AT1G17630
AT1G17640
AT1G17650
AT1G17665
AT1G17670
AT1G17680
AT1G17690
AT1G17720
AT1G17730
AT1G17744
AT1G17745
AT1G17750
AT1G17760
AT1G17780
AT1G17790
AT1G17820
AT1G17840
AT1G17850
AT1G17860
AT1G17870
AT1G17880
AT1G17890
AT1G17920
AT1G17930
AT1G17940
AT1G17970
AT1G17980
AT1G18000
AT1G18010
AT1G18030
AT1G18040
AT1G18060
AT1G18070
AT1G18075
AT1G18080
AT1G18090
AT1G18140
AT1G18150
AT1G18160
AT1G18170
AT1G18180
AT1G18190
AT1G18210
AT1G18250
AT1G18260
AT1G18265
AT1G18270
AT1G18300
AT1G18320
AT1G18330
AT1G18335
AT1G18340
AT1G18360
AT1G18382
AT1G18390
AT1G18415
AT1G18420
AT1G18430
AT1G18440
AT1G18450
AT1G18460
AT1G18470
AT1G18480
AT1G18485
AT1G18490
AT1G18500
AT1G18540
AT1G18550
AT1G18560
AT1G18580
AT1G18590
AT1G18600
AT1G18610
AT1G18620
AT1G18630
AT1G18640
AT1G18650
AT1G18660
AT1G18670
AT1G18680
AT1G18690
AT1G18700
AT1G18720
AT1G18730
AT1G18740
AT1G18745
AT1G18750
AT1G18773
AT1G18800
AT1G18840
AT1G18850
AT1G18890
AT1G18900
AT1G18910
AT1G18940
AT1G18950
AT1G19000
AT1G19010
AT1G19020
AT1G19025
AT1G19050
AT1G19070
AT1G19080
AT1G19100
AT1G19110
AT1G19120
AT1G19130
AT1G19140
AT1G19150
AT1G19170
AT1G19180
AT1G19190
AT1G19200
AT1G19210
AT1G19220
AT1G19240
AT1G19250
AT1G19270
AT1G19290
AT1G19300
AT1G19310
AT1G19330
AT1G19340
AT1G19350
AT1G19360
AT1G19370
AT1G19373
AT1G19376
AT1G19380
AT1G19394
AT1G19396
AT1G19400
AT1G19410
AT1G19430
AT1G19440
AT1G19450
AT1G19480
AT1G19485
AT1G19490
AT1G19520
AT1G19540
AT1G19570
AT1G19580
AT1G19600
AT1G19650
AT1G19660
AT1G19670
AT1G19680
AT1G19690
AT1G19700
AT1G19710
AT1G19720
AT1G19730
AT1G19740
AT1G19750
AT1G19770
AT1G19780
AT1G19800
AT1G19830
AT1G19835
AT1G19840
AT1G19850
AT1G19860
AT1G19870
AT1G19880
AT1G19910
AT1G19920
AT1G19950
AT1G19970
AT1G19980
AT1G19990
AT1G20010
AT1G20015
AT1G20020
AT1G20030
AT1G20050
AT1G20060
AT1G20065
AT1G20090
AT1G20100
AT1G20110
AT1G20140
AT1G20190
AT1G20200
AT1G20220
AT1G20225
AT1G20230
AT1G20260
AT1G20270
AT1G20290
AT1G20300
AT1G20310
AT1G20330
AT1G20340
AT1G20370
AT1G20380
AT1G20410
AT1G20420
AT1G20430
AT1G20440
AT1G20450
AT1G20460
AT1G20480
AT1G20490
AT1G20510
AT1G20515
AT1G20540
AT1G20550
AT1G20560
AT1G20570
AT1G20575
AT1G20580
AT1G20610
AT1G20620
AT1G20630
AT1G20640
AT1G20650
AT1G20670
AT1G20690
AT1G20691
AT1G20693
AT1G20696
AT1G20720
AT1G20760
AT1G20770
AT1G20780
AT1G20810
AT1G20816
AT1G20820
AT1G20823
AT1G20830
AT1G20840
AT1G20875
AT1G20880
AT1G20890
AT1G20910
AT1G20920
AT1G20930
AT1G20950
AT1G20960
AT1G20970
AT1G20980
AT1G21000
AT1G21010
AT1G21050
AT1G21060
AT1G21065
AT1G21070
AT1G21080
AT1G21090
AT1G21150
AT1G21160
AT1G21170
AT1G21190
AT1G21200
AT1G21250
AT1G21260
AT1G21270
AT1G21280
AT1G21281
AT1G21310
AT1G21320
AT1G21350
AT1G21370
AT1G21380
AT1G21390
AT1G21400
AT1G21410
AT1G21440
AT1G21450
AT1G21460
AT1G21480
AT1G21500
AT1G21540
AT1G21560
AT1G21580
AT1G21590
AT1G21600
AT1G21610
AT1G21630
AT1G21640
AT1G21650
AT1G21651
AT1G21660
AT1G21670
AT1G21680
AT1G21690
AT1G21695
AT1G21700
AT1G21710
AT1G21720
AT1G21730
AT1G21740
AT1G21750
AT1G21760
AT1G21770
AT1G21780
AT1G21790
AT1G21830
AT1G21840
AT1G21880
AT1G21900
AT1G21910
AT1G21920
AT1G21930
AT1G21980
AT1G22020
AT1G22030
AT1G22040
AT1G22050
AT1G22060
AT1G22070
AT1G22140
AT1G22160
AT1G22170
AT1G22190
AT1G22200
AT1G22220
AT1G22250
AT1G22260
AT1G22270
AT1G22275
AT1G22280
AT1G22300
AT1G22310
AT1G22330
AT1G22400
AT1G22403
AT1G22410
AT1G22430
AT1G22450
AT1G22460
AT1G22470
AT1G22490
AT1G22510
AT1G22520
AT1G22530
AT1G22540
AT1G22600
AT1G22610
AT1G22620
AT1G22630
AT1G22640
AT1G22660
AT1G22700
AT1G22730
AT1G22740
AT1G22750
AT1G22770
AT1G22780
AT1G22790
AT1G22800
AT1G22830
AT1G22840
AT1G22850
AT1G22860
AT1G22870
AT1G22880
AT1G22882
AT1G22910
AT1G22920
AT1G22930
AT1G22940
AT1G22950
AT1G22960
AT1G22970
AT1G22985
AT1G23000
AT1G23030
AT1G23040
AT1G23050
AT1G23052
AT1G23080
AT1G23100
AT1G23140
AT1G23170
AT1G23180
AT1G23190
AT1G23205
AT1G23220
AT1G23230
AT1G23260
AT1G23280
AT1G23290
AT1G23300
AT1G23310
AT1G23330
AT1G23360
AT1G23380
AT1G23390
AT1G23400
AT1G23410
AT1G23440
AT1G23465
AT1G23480
AT1G23490
AT1G23550
AT1G23710
AT1G23740
AT1G23750
AT1G23780
AT1G23790
AT1G23820
AT1G23860
AT1G23870
AT1G23880
AT1G23890
AT1G23900
AT1G23950
AT1G23960
AT1G23965
AT1G23970
AT1G23980
AT1G24020
AT1G24040
AT1G24050
AT1G24070
AT1G24090
AT1G24095
AT1G24100
AT1G24120
AT1G24140
AT1G24150
AT1G24160
AT1G24170
AT1G24180
AT1G24190
AT1G24210
AT1G24240
AT1G24260
AT1G24265
AT1G24267
AT1G24280
AT1G24290
AT1G24300
AT1G24310
AT1G24330
AT1G24340
AT1G24350
AT1G24360
AT1G24440
AT1G24450
AT1G24460
AT1G24490
AT1G24510
AT1G24530
AT1G24560
AT1G24610
AT1G24625
AT1G24706
AT1G24764
AT1G24793
AT1G24800
AT1G24822
AT1G24880
AT1G24881
AT1G24996
AT1G25054
AT1G25055
AT1G25097
AT1G25098
AT1G25145
AT1G25150
AT1G25175
AT1G25210
AT1G25211
AT1G25220
AT1G25260
AT1G25275
AT1G25280
AT1G25290
AT1G25320
AT1G25350
AT1G25360
AT1G25370
AT1G25375
AT1G25380
AT1G25390
AT1G25400
AT1G25420
AT1G25440
AT1G25450
AT1G25470
AT1G25472
AT1G25480
AT1G25490
AT1G25500
AT1G25510
AT1G25520
AT1G25540
AT1G25550
AT1G25560
AT1G25570
AT1G25580
AT1G25682
AT1G26090
AT1G26100
AT1G26110
AT1G26120
AT1G26130
AT1G26150
AT1G26160
AT1G26170
AT1G26180
AT1G26190
AT1G26208
AT1G26210
AT1G26218
AT1G26220
AT1G26230
AT1G26233
AT1G26235
AT1G26260
AT1G26270
AT1G26300
AT1G26340
AT1G26370
AT1G26440
AT1G26460
AT1G26470
AT1G26500
AT1G26520
AT1G26530
AT1G26540
AT1G26550
AT1G26560
AT1G26570
AT1G26580
AT1G26600
AT1G26620
AT1G26630
AT1G26640
AT1G26650
AT1G26660
AT1G26665
AT1G26670
AT1G26690
AT1G26730
AT1G26740
AT1G26750
AT1G26761
AT1G26770
AT1G26780
AT1G26800
AT1G26810
AT1G26830
AT1G26840
AT1G26850
AT1G26880
AT1G26900
AT1G26910
AT1G26920
AT1G26921
AT1G26930
AT1G26940
AT1G26960
AT1G27000
AT1G27050
AT1G27060
AT1G27070
AT1G27090
AT1G27100
AT1G27120
AT1G27130
AT1G27140
AT1G27150
AT1G27170
AT1G27190
AT1G27200
AT1G27210
AT1G27290
AT1G27300
AT1G27310
AT1G27320
AT1G27330
AT1G27340
AT1G27350
AT1G27360
AT1G27370
AT1G27385
AT1G27390
AT1G27400
AT1G27410
AT1G27430
AT1G27435
AT1G27440
AT1G27450
AT1G27460
AT1G27470
AT1G27480
AT1G27500
AT1G27510
AT1G27520
AT1G27530
AT1G27540
AT1G27600
AT1G27630
AT1G27640
AT1G27650
AT1G27680
AT1G27690
AT1G27695
AT1G27700
AT1G27720
AT1G27730
AT1G27750
AT1G27752
AT1G27760
AT1G27770
AT1G27820
AT1G27840
AT1G27850
AT1G27880
AT1G27900
AT1G27910
AT1G27920
AT1G27921
AT1G27930
AT1G27950
AT1G27960
AT1G27970
AT1G27980
AT1G28050
AT1G28060
AT1G28070
AT1G28090
AT1G28100
AT1G28110
AT1G28120
AT1G28140
AT1G28150
AT1G28190
AT1G28200
AT1G28210
AT1G28230
AT1G28240
AT1G28250
AT1G28260
AT1G28280
AT1G28281
AT1G28290
AT1G28310
AT1G28320
AT1G28330
AT1G28340
AT1G28350
AT1G28360
AT1G28370
AT1G28380
AT1G28390
AT1G28395
AT1G28400
AT1G28410
AT1G28420
AT1G28440
AT1G28490
AT1G28510
AT1G28520
AT1G28530
AT1G28540
AT1G28560
AT1G28580
AT1G28600
AT1G28670
AT1G28680
AT1G28685
AT1G28690
AT1G28760
AT1G28960
AT1G29030
AT1G29040
AT1G29041
AT1G29060
AT1G29070
AT1G29120
AT1G29150
AT1G29160
AT1G29170
AT1G29195
AT1G29220
AT1G29240
AT1G29250
AT1G29260
AT1G29300
AT1G29310
AT1G29320
AT1G29330
AT1G29340
AT1G29350
AT1G29355
AT1G29357
AT1G29370
AT1G29390
AT1G29395
AT1G29400
AT1G29410
AT1G29418
AT1G29420
AT1G29460
AT1G29465
AT1G29470
AT1G29500
AT1G29510
AT1G29530
AT1G29550
AT1G29630
AT1G29640
AT1G29670
AT1G29690
AT1G29700
AT1G29710
AT1G29740
AT1G29750
AT1G29760
AT1G29785
AT1G29790
AT1G29800
AT1G29810
AT1G29840
AT1G29850
AT1G29880
AT1G29890
AT1G29900
AT1G29910
AT1G29920
AT1G29930
AT1G29940
AT1G29950
AT1G29951
AT1G29952
AT1G29960
AT1G29965
AT1G29970
AT1G29980
AT1G29990
AT1G30000
AT1G30010
AT1G30040
AT1G30070
AT1G30090
AT1G30100
AT1G30120
AT1G30130
AT1G30200
AT1G30210
AT1G30230
AT1G30240
AT1G30260
AT1G30270
AT1G30280
AT1G30282
AT1G30290
AT1G30300
AT1G30320
AT1G30330
AT1G30360
AT1G30380
AT1G30400
AT1G30410
AT1G30440
AT1G30450
AT1G30460
AT1G30470
AT1G30475
AT1G30480
AT1G30490
AT1G30500
AT1G30510
AT1G30515
AT1G30520
AT1G30530
AT1G30540
AT1G30550
AT1G30570
AT1G30580
AT1G30590
AT1G30600
AT1G30610
AT1G30620
AT1G30630
AT1G30640
AT1G30680
AT1G30690
AT1G30740
[truncated: 14,621 more rows]

## Sheet: L K27
AT4G32100
AT2G40435
AT1G30814
AT4G34580
AT3G63233
AT4G14251
AT4G03450
AT1G71695
AT4G25920
AT1G12980
AT1G08135
AT1G29010
AT1G23201
AT3G60950
AT1G09030
AT5G19720
AT3G43250
AT3G21990
AT5G18450
AT2G25630
AT3G54820
AT5G46310
AT5G45530
AT2G17600
AT3G22840
AT1G77340
AT5G35715
AT4G31250
AT2G23210
AT5G07505
AT2G21930
AT3G15170
AT4G25090
AT1G21310
AT3G18470
AT2G18870
AT5G50770
AT1G56250
AT5G04950
AT1G28305
AT5G25550
AT4G02740
AT1G02190
AT1G14100
AT3G18720
AT5G23000
AT4G20650
AT2G43600
AT2G02680
AT1G66852
AT1G22340
AT3G13790
AT4G30770
AT1G69810
AT5G63170
AT1G75600
AT5G52260
AT5G67000
AT5G36970
AT3G03272
AT4G32280
AT4G27250
AT4G03298
AT3G12880
AT2G22960
AT5G53205
AT1G65630
AT1G71390
AT1G47790
AT5G46260
AT4G34160
AT4G19910
AT4G11211
AT4G19720
AT2G38230
AT1G80850
AT3G04060
AT3G50870
AT4G19380
AT1G60073
AT2G41220
AT3G49150
AT3G09680
AT4G10596
AT1G51810
AT3G59590
AT1G25988
AT4G22235
AT1G15210
AT5G57730
AT3G63470
AT4G23710
AT2G16970
AT2G04100
AT2G18328
AT3G25905
AT3G23430
AT3G48230
AT3G44400
AT4G14690
AT3G49770
AT2G40802
AT5G42580
AT5G38770
AT4G22180
AT2G33130
AT5G22720
AT3G49700
AT1G57800
AT4G23200
AT5G52690
AT1G26380
AT1G08080
AT4G10680
AT2G38544
AT5G50060
AT2G32350
AT1G75550
AT1G71890
AT1G23120
AT3G13650
AT2G31920
AT2G05520
AT1G80090
AT4G26560
AT1G80580
AT1G44800
AT4G23670
AT1G68810
AT4G28520
AT2G31780
AT1G23720
AT4G20560
AT4G03566
AT2G04220
AT4G02317
AT3G45170
AT2G27700
AT2G40210
AT5G57625
AT5G51210
AT5G27870
AT5G16285
AT1G25510
AT3G22000
AT5G06300
AT5G24950
AT5G66710
AT3G06890
AT5G26070
AT1G05250
AT3G44560
AT1G67260
AT5G53620
AT4G31950
AT2G41380
AT1G10010
AT1G02310
AT3G61290
AT3G48310
AT5G59390
AT5G55880
AT3G49765
AT1G68270
AT3G27970
AT5G26250
AT3G09990
AT5G20560
AT5G12990
AT2G02300
AT5G42410
AT5G66816
AT1G74000
AT1G70510
AT3G47180
AT3G21360
AT5G44585
AT5G63230
AT3G05960
AT1G55580
AT4G36170
AT5G62750
AT5G61090
AT5G24960
AT2G45434
AT3G11310
AT2G43620
AT1G53340
AT2G16130
AT3G17140
AT5G50500
AT3G57250
AT3G57510
AT2G47560
AT1G56540
AT5G11630
AT4G11880
AT2G37390
AT1G26795
AT4G16024
AT1G77150
AT1G77520
AT2G03840
AT5G28640
AT4G25760
AT5G53910
AT2G05435
AT1G10747
AT5G09500
AT1G69860
AT1G33560
AT5G56970
AT1G01250
AT4G19680
AT2G38390
AT1G43650
AT5G09320
AT5G03810
AT1G51230
AT3G26470
AT1G09960
AT3G20760
AT5G23960
AT4G33600
AT1G51990
AT5G23030
AT1G75390
AT3G29580
AT1G62510
AT2G38380
AT2G33520
AT1G53625
AT5G35900
AT2G42110
AT3G05730
AT2G38940
AT1G21327
AT4G34800
AT4G28340
AT3G58350
AT2G17305
AT5G25300
AT5G45540
AT1G78710
AT1G33730
AT1G12672
AT5G40360
AT1G71280
AT3G18715
AT2G24260
AT2G18350
AT3G57620
AT3G07970
AT2G21910
AT4G28130
AT5G08070
AT3G08700
AT5G41510
AT2G40160
AT2G30933
AT5G06610
AT1G08160
AT2G22470
AT5G22870
AT2G01940
AT1G06330
AT2G02310
AT5G46130
AT4G11020
AT3G16430
AT4G01140
AT2G42990
AT2G26370
AT1G62978
AT5G05340
AT4G29280
AT3G03290
AT2G22145
AT3G22770
AT2G41810
AT4G05110
AT3G24230
AT1G47317
AT1G31010
AT5G38000
AT1G75730
AT1G19230
AT1G80840
AT5G03570
AT3G28320
AT3G57850
AT2G23160
AT1G28080
AT2G28420
AT4G10457
AT5G44630
AT1G60450
AT5G05810
AT2G40900
AT5G02340
AT1G56270
AT5G38240
AT4G15280
AT4G01925
AT5G51490
AT5G25415
AT5G18270
AT5G24100
AT2G32210
AT3G14990
AT3G18150
AT4G34790
AT3G51400
AT5G24150
AT4G23590
AT4G15417
AT3G19920
AT4G25020
AT3G44910
AT2G02660
AT1G49570
AT2G45130
AT2G39415
AT1G68470
AT1G13609
AT5G58400
AT5G50800
AT2G27750
AT3G25815
AT1G48800
AT1G47980
AT5G41390
AT4G35020
AT2G43610
AT2G38910
AT5G23190
AT1G23250
AT1G26400
AT5G19650
AT4G13090
AT3G15910
AT5G66630
AT5G07990
AT4G16230
AT3G41768
AT1G11520
AT5G60720
AT5G46890
AT3G54940
AT1G50990
AT2G25130
AT2G19806
AT4G24070
AT1G03905
AT3G55100
AT3G48275
AT5G22970
AT2G36325
AT1G22150
AT1G51320
AT5G24240
AT5G45730
AT2G44240
AT1G26700
AT1G07500
AT1G70260
AT5G17750
AT1G61563
AT2G22680
AT4G25330
AT2G40330
AT2G17470
AT1G55700
AT5G61660
AT2G19990
AT2G02540
AT1G10250
AT3G12910
AT3G24250
AT1G55650
AT1G51850
AT3G25730
AT2G03720
AT2G28960
AT3G47210
AT2G47810
AT4G39750
AT4G05105
AT3G63360
AT3G05450
AT1G55928
AT3G18010
AT5G59040
AT4G18550
AT4G35030
AT2G03170
AT5G22980
AT3G01250
AT5G49520
AT1G53645
AT3G46070
AT3G10195
AT1G10750
AT5G37180
AT1G18810
AT2G38905
AT3G01840
AT1G09930
AT2G42440
AT5G24820
AT4G26255
AT1G10585
AT2G40520
AT3G23090
AT4G28510
AT2G01830
AT2G02450
AT4G37690
AT3G28420
AT5G05050
AT4G30975
AT1G54560
AT4G30420
AT2G02440
AT1G12030
AT2G22530
AT2G15590
AT3G46190
AT2G18080
AT1G09483
AT3G36659
AT1G20320
AT4G33040
AT1G47813
AT1G66880
AT4G33020
AT3G57140
AT3G13010
AT1G70910
AT2G32360
AT5G06030
AT5G39720
AT1G05260
AT3G24670
AT4G27415
AT3G61920
AT3G02150
AT2G22050
AT1G33102
AT4G11170
AT2G20350
AT5G23790
AT1G12663
AT2G28810
AT4G22700
AT5G35660
AT1G01580
AT5G07410
AT3G44970
AT2G14210
AT5G14730
AT3G49580
AT2G22060
AT3G02242
AT4G17980
AT2G41860
AT5G60070
AT3G54410
AT2G27780
AT2G05510
AT2G15600
AT2G26380
AT1G52400
AT5G16567
AT1G66050
AT5G24790
AT5G41490
AT5G07000
AT4G32780
AT5G54225
AT1G28375
AT2G16580
AT2G37810
AT3G50390
AT1G14880
AT5G26147
AT4G14368
AT1G11190
AT5G54220
AT1G03890
AT5G23370
AT2G21220
AT5G54148
AT4G35725
AT3G49440
AT3G44700
AT1G47786
AT3G20470
AT1G59780
AT5G61630
AT3G23630
AT5G59310
AT3G19520
AT3G25750
AT1G69792
AT3G11402
AT1G58090
AT5G43066
AT5G51320
AT1G19630
AT1G20380
AT3G28570
AT2G02930
AT4G39000
AT2G03550
AT3G47170
AT1G17800
AT5G07700
AT5G38420
AT3G22235
AT5G23010
AT2G39850
AT4G01535
AT1G65681
AT5G37910
AT4G21030
AT2G18720
AT1G01410
AT1G74620
AT5G05420
AT1G51910
AT3G23060
AT1G80220
AT5G33340
AT1G06980
AT5G11320
AT3G02810
AT5G16100
AT3G14880
AT5G66340
AT2G16190
AT1G50954
AT1G50310
AT1G49475
AT5G40790
AT5G61605
AT3G25573
AT1G20900
AT5G38960
AT1G49430
AT3G12203
AT3G04570
AT5G59120
AT5G25810
AT1G28660
AT1G14040
AT2G40030
AT2G34530
AT1G01030
AT2G19050
AT5G40560
AT3G28917
AT3G14820
AT2G30840
AT2G44110
AT3G57670
AT4G30410
AT4G27140
AT5G04347
AT3G03280
AT3G43829
AT1G47480
AT1G42980
AT5G10420
AT2G37100
AT4G37580
AT1G22900
AT5G11050
AT1G75710
AT5G61700
AT3G61400
AT4G13960
AT3G62440
AT3G26790
AT2G15610
AT3G49470
AT5G42146
AT1G68800
AT1G35180
AT1G35210
AT1G63030
AT5G42591
AT5G38020
AT5G07160
AT5G17450
AT3G50120
AT3G49820
AT1G53350
AT1G66440
AT2G19425
AT3G48700
AT2G43960
AT3G30724
AT5G42250
AT5G51790
AT1G66320
AT1G66090
AT5G13380
AT4G00080
AT5G16460
AT3G12470
AT1G72860
AT1G73510
AT4G09890
AT1G33890
AT5G10340
AT5G41550
AT5G64690
AT5G04500
AT5G02035
AT4G21780
AT3G26120
AT2G33270
AT2G43820
AT5G65590
AT1G70080
AT1G56430
AT5G24879
AT1G47320
AT2G39800
AT4G15120
AT4G34970
AT5G60470
AT5G10430
AT2G43510
AT4G33610
AT4G01360
AT5G48210
AT3G01270
AT2G03030
AT1G49470
AT2G24660
AT5G10660
AT5G44020
AT3G46700
AT3G44830
AT2G28760
AT4G23882
AT4G36600
AT4G18940
AT3G59845
AT1G69080
AT3G16930
AT3G08040
AT5G24540
AT1G60370
AT5G38710
AT5G20260
AT3G21960
AT5G12940
AT2G25260
AT2G35270
AT5G15060
AT2G02140
AT4G13660
AT3G61910
AT4G39720
AT3G29670
AT1G65750
AT5G14070
AT2G17050
AT2G02060
AT1G06137
AT4G20990
AT3G26110
AT2G21010
AT1G53163
AT2G15025
AT2G30130
AT1G55030
AT3G22040
AT3G51200
AT5G50115
AT4G29640
AT1G18410
AT2G03300
AT1G01200
AT5G38530
AT3G52980
AT5G48110
AT1G04500
AT2G02700
AT5G52400
AT5G39650
AT3G50770
AT5G48430
AT3G16920
AT3G49330
AT2G39175
AT4G00540
AT4G35670
AT4G09030
AT1G77682
AT4G09100
AT1G62440
AT2G23640
AT4G05230
AT1G44740
AT5G37478
AT3G28300
AT4G33220
AT1G80325
AT1G30730
AT4G24660
AT4G16590
AT5G43520
AT4G01540
AT3G48550
AT4G29580
AT5G50190
AT4G21600
AT2G46493
AT2G33650
AT1G26796
AT5G39260
AT3G02500
AT5G50880
AT5G17073
AT4G16095
AT5G09805
AT3G23970
AT3G47480
AT1G68500
AT1G43886
AT4G36160
AT2G16575
AT5G41250
AT4G11590
AT3G44220
AT3G01020
AT5G62420
AT3G28910
AT3G21040
AT5G04380
AT4G24026
AT1G77760
AT3G24780
AT5G10504
AT5G35600
AT1G21866
AT1G14870
AT1G53820
AT5G56620
AT5G07040
AT1G51900
AT3G26782
AT4G22090
AT2G25450
AT1G29860
AT5G44380
AT1G20350
AT5G20820
AT3G31051
AT1G22370
AT4G15320
AT1G32020
AT3G49130
AT3G45960
AT5G56325
AT4G35640
AT4G08160
AT1G52695
AT1G04180
AT2G18050
AT1G03800
AT5G60615
AT4G01430
AT4G37940
AT4G17920
AT5G54062
AT2G19890
AT3G23950
AT2G45400
AT1G47370
AT2G32280
AT1G14950
AT1G79430
AT1G55660
AT3G45290
AT1G10260
AT2G41233
AT2G22170
AT4G21000
AT1G33750
AT1G61270
AT5G53190
AT2G19800
AT1G78390
AT4G00120
AT3G26150
AT5G46010
AT5G46875
AT1G52000
AT4G25250
AT1G37130
AT1G31310
AT1G27040
AT1G15630
AT3G55677
AT5G52620
AT4G24060
AT1G01183
AT1G04670
AT5G48510
AT4G28365
AT2G04495
AT4G11340
AT3G14970
AT2G25820
AT4G02300
AT2G14206
AT5G10030
AT3G52970
AT2G25330
AT5G14800
AT4G34419
AT4G02280
AT1G24480
AT4G08770
AT4G03565
AT3G49950
AT1G78960
AT1G72140
AT2G21140
AT1G05291
AT2G01300
AT5G25400
AT5G09940
AT1G51000
AT5G38120
AT2G36890
AT3G16590
AT1G18310
AT5G49690
AT3G55590
AT5G37690
AT3G19430
AT2G40990
AT3G20690
AT5G46380
AT5G37730
AT5G14345
AT5G23470
AT5G06230
AT5G63660
AT3G04360
AT2G32540
AT3G10845
AT1G78476
AT3G57950
AT1G13300
AT2G46720
AT2G35670
AT5G26805
AT2G28970
AT4G11655
AT1G47350
AT5G51610
AT3G19660
AT2G45830
AT3G49360
AT3G15840
AT1G24010
AT1G14960
AT4G28395
AT4G30280
AT2G21610
AT4G09850
AT5G07625
AT1G21300
AT4G18050
AT4G25160
AT2G23060
AT2G03250
AT1G34500
AT1G32660
AT1G30220
AT3G28270
AT1G24530
AT1G59730
AT5G03120
AT3G04990
AT4G22640
AT1G62420
AT3G46613
AT5G57620
AT4G03620
AT1G06080
AT3G41979
AT2G45110
AT1G09790
AT4G25260
AT1G02405
AT4G19790
AT5G65100
AT1G61590
AT5G43300
AT1G25400
AT5G17795
AT3G06370
AT5G49240
AT2G03020
AT4G02670
AT3G27410
AT1G43140
AT2G01023
AT5G45970
AT2G23900
AT1G49770
AT3G28330
AT2G44745
AT1G51300
AT4G19930
AT1G56150
AT2G22800
AT5G45870
AT4G22160
AT3G27500
AT3G21680
AT2G02120
AT1G75520
AT1G53890
AT1G53130
AT5G03260
AT5G01370
AT4G11190
AT1G47885
AT5G26920
AT3G60010
AT4G37950
AT2G34110
AT5G57130
AT5G56370
AT1G16290
AT3G47400
AT4G19810
AT3G58390
AT4G13345
AT5G47450
AT4G36250
AT3G58440
AT3G01185
AT1G23730
AT4G11745
AT1G49450
AT3G61500
AT2G39030
AT1G33080
AT1G04330
AT5G11130
AT3G25190
AT5G66815
AT2G27930
AT1G64290
AT3G17720
AT1G65350
AT1G02205
AT3G29830
AT2G34790
AT3G45285
AT1G63440
AT1G13290
AT5G55770
AT3G51171
AT2G34204
AT3G54070
AT5G56420
AT3G50740
AT4G13572
AT2G20080
AT3G60100
AT1G62810
AT1G68280
AT1G05580
AT1G11185
AT1G50880
AT5G53210
AT4G14465
AT2G16225
AT4G12950
AT3G46086
AT1G44830
AT5G01240
AT4G15396
AT2G28610
AT5G06040
AT4G39130
AT2G14500
AT5G36100
AT4G23370
AT1G65113
AT2G31081
AT3G01080
AT1G68180
AT2G13680
AT5G39440
AT1G61630
AT1G48910
AT1G28590
AT5G38450
AT2G45750
AT1G70860
AT3G51700
AT3G55580
AT3G21371
AT1G75790
AT1G68170
AT5G11660
AT4G14810
AT2G44010
AT2G44030
AT1G64930
AT3G52520
AT2G45650
AT5G14010
AT5G40020
AT2G23170
AT2G30940
AT1G30950
AT3G58865
AT1G07860
AT3G06962
AT4G13240
AT2G14580
AT5G28490
AT1G51240
AT3G59160
AT5G44490
AT3G25655
AT4G26820
AT4G08590
AT4G22810
AT5G26190
AT5G05790
AT5G37420
AT3G51190
AT5G65850
AT2G04500
AT1G62270
AT1G02940
AT1G68130
AT5G62320
AT3G12430
AT1G60350
AT5G23950
AT5G01340
AT2G01340
AT5G55720
AT5G55080
AT2G47040
AT2G30770
AT3G48231
AT2G28630
AT3G53770
AT2G03290
AT3G61150
AT1G18570
AT5G53990
AT4G25410
AT3G01331
AT3G12970
AT5G44330
AT5G05430
AT2G43270
AT4G26280
AT3G17260
AT5G42210
AT5G40348
AT3G26550
AT2G39320
AT1G70270
AT4G16563
AT3G28220
AT1G01670
AT1G34580
AT1G02050
AT5G50870
AT1G80100
AT5G56200
AT2G26050
AT4G00180
AT4G13210
AT4G09110
AT1G48698
AT2G29125
AT1G71930
AT1G32270
AT3G45940
AT3G23100
AT4G23600
AT3G19274
AT1G15640
AT1G20120
AT5G67060
AT3G16530
AT4G38410
AT5G17320
AT1G56040
AT5G65730
AT2G32550
AT1G05370
AT1G47435
AT4G16540
AT1G68630
AT4G24300
AT5G48070
AT4G22510
AT3G11435
AT5G52130
AT1G17060
AT1G31040
AT3G21980
AT2G34140
AT1G67865
AT1G68825
AT3G15370
AT3G50755
AT3G11430
AT1G05510
AT1G49100
AT2G45450
AT4G18320
AT2G21050
AT4G14820
AT1G05500
AT5G07630
AT2G26695
AT2G23880
AT1G02580
AT3G48300
AT4G15750
AT2G44560
AT3G04290
AT1G66450
AT2G16005
AT4G15500
AT2G36190
AT4G33330
AT5G26100
AT3G11150
AT2G29790
AT3G03540
AT4G14250
AT2G28220
AT3G09940
AT3G51860
AT3G44350
AT1G54720
AT4G22960
AT2G25940
AT5G17820
AT4G17580
AT5G66400
AT5G46960
AT2G33710
AT2G23240
AT3G45560
AT4G10160
AT1G11510
AT5G01320
AT4G35370
AT1G56560
AT2G21260
AT5G39690
AT1G30660
AT1G61660
AT1G52140
AT1G68600
AT1G60410
AT3G60120
AT1G66490
AT4G09820
AT3G53640
AT4G35733
AT2G45760
AT3G07620
AT4G37720
AT4G29120
AT4G33870
AT5G02890
AT4G17700
AT3G01240
AT1G49110
AT4G10465
AT2G21920
AT2G45220
AT3G43860
AT5G24560
AT1G71050
AT1G77650
AT5G25340
AT2G34210
AT5G36925
AT1G49310
AT5G43840
AT5G43603
AT2G46255
AT2G28010
AT1G69650
AT5G54030
AT5G10180
AT5G58390
AT5G37320
AT5G33355
AT1G19620
AT2G31910
AT1G59670
AT5G07540
AT1G26973
AT2G34610
AT1G66960
AT2G30750
AT4G11393
AT3G09520
AT2G37010
AT1G74990
AT1G66540
AT1G33840
AT5G42180
AT4G15765
AT5G43610
AT2G46640
AT4G01355
AT3G22800
AT3G15050
AT1G21326
AT1G31772
AT5G15120
AT2G27670
AT3G58360
AT4G29710
AT3G43410
AT1G13608
AT1G69795
AT4G18910
AT2G21490
AT4G15310
AT5G41570
AT1G15010
AT3G45610
AT1G06800
AT2G39530
AT1G52830
AT1G68320
AT1G20800
AT5G30500
AT2G19420
AT4G39010
AT4G09600
AT3G13290
AT1G23160
AT3G44765
AT1G66860
AT1G26200
AT3G57540
AT2G25780
AT1G65760
AT1G29870
AT2G25160
AT1G08230
AT5G20390
AT4G13290
AT3G27720
AT3G21710
AT1G20180
AT1G53683
AT1G48810
AT2G03500
AT2G47260
AT1G03170
AT1G27461
AT1G47610
AT2G41410
AT3G01880
AT1G76830
AT4G00050
AT1G04280
AT4G26950
AT3G09960
AT3G54700
AT1G55020
AT1G29660
AT5G11977
AT5G41500
AT3G28321
AT2G18130
AT1G65060
AT4G16260
AT4G04490
AT3G20898
AT4G20550
AT3G55240
AT1G53940
AT1G02790
AT4G21840
AT2G19070
AT1G79580
AT3G26934
AT3G25170
AT1G47389
AT5G53905
AT4G27170
AT2G34925
AT1G73330
AT4G33120
AT1G35140
AT4G23380
AT3G52527
AT1G79420
AT2G24800
AT1G52070
AT1G22015
AT3G17060
AT1G33280
AT4G08450
AT1G23240
AT5G41660
AT5G57785
AT3G49200
AT2G33880
AT1G59810
AT1G28306
AT5G41590
AT1G54300
AT1G03840
AT4G16235
AT1G11125
AT5G42600
AT3G26147
AT4G12890
AT5G50300
AT1G03495
AT1G70450
AT1G05320
AT5G09970
AT5G49525
AT1G78820
AT2G27570
AT1G03790
AT5G45307
AT1G68750
AT1G22065
AT2G43060
AT3G62990
AT1G48190
AT5G08360
AT4G18920
AT5G56490
AT5G25420
AT5G07690
AT5G05120
AT2G18880
AT1G69940
AT1G01070
AT1G74420
AT1G30790
AT5G64790
AT3G26511
AT5G65800
AT5G25160
AT4G13610
AT2G23960
AT1G56680
AT5G07760
AT2G27120
AT5G36870
AT1G79480
AT1G21850
AT2G36110
AT3G01260
AT5G57780
AT2G38060
AT1G44478
AT4G00390
AT2G37430
AT2G43880
AT2G31005
AT3G54320
AT2G26130
AT1G75910
AT1G77200
AT1G55380
AT5G23395
AT4G02270
AT5G65070
AT5G57720
AT5G46810
AT4G15870
AT3G49190
AT2G24810
AT1G20860
AT1G18200
AT3G44300
AT5G17650
AT2G18690
AT3G26290
AT5G07322
AT5G14011
AT1G28160
AT2G23400
AT4G11390
AT3G44960
AT2G47770
AT5G27530
AT3G48280
AT1G70970
AT5G11990
AT3G18550
AT2G42050
AT1G70920
AT5G61865
AT4G14060
AT5G60810
AT4G18850
AT1G08320
AT4G01180
AT5G55856
AT3G54450
AT5G23020
AT5G19600
AT5G38010
AT3G23290
AT2G02340
AT3G12900
AT5G61100
AT4G01985
AT1G21960
AT3G61118
AT5G63600
AT5G50160
AT4G12500
AT4G00315
AT2G32890
AT1G71770
AT4G30290
AT2G18196
AT5G25140
AT1G63245
AT4G05240
AT5G54210
AT4G30460
AT4G18620
AT3G19410
AT2G34880
AT4G35165
AT3G04070
AT1G19670
AT2G21030
AT1G23000
AT1G14700
AT5G22430
AT5G14020
AT4G12280
AT2G14220
AT1G27660
AT5G25330
AT5G19530
AT5G05113
AT3G23220
AT5G11930
AT4G09440
AT1G07720
AT3G28600
AT3G20580
AT1G48325
AT2G02650
AT2G02630
AT3G44540
AT1G26310
AT2G38530
AT5G17950
AT1G52110
AT2G31082
AT4G10865
AT2G35910
AT3G59170
AT5G17850
AT3G59600
AT1G59453
AT5G39533
AT5G43590
AT5G22160
AT3G61550
AT3G28243
AT1G18860
AT3G60790
AT5G50360
AT2G20430
AT1G75930
AT1G77700
AT5G38610
AT5G63590
AT3G50180
AT5G47000
AT4G32580
AT1G54550
AT4G22517
AT5G19110
AT4G02780
AT2G03830
AT3G61035
AT1G65890
AT3G16670
AT3G29050
AT1G55240
AT5G17700
AT5G28000
AT5G16235
AT3G19070
AT1G28650
AT1G46264
AT3G21940
AT1G18760
AT1G78470
AT1G65210
AT2G01990
AT4G14165
AT2G16220
AT5G55800
AT5G38435
AT2G27660
AT3G22330
AT5G15500
AT3G57630
AT5G50801
AT5G39240
AT1G52827
AT4G02870
AT2G40805
AT1G65680
AT4G01420
AT3G61198
AT3G44920
AT1G06280
AT5G01680
AT2G30310
AT3G10080
AT1G11150
AT5G57510
AT3G55130
AT1G08465
AT2G16050
AT1G54890
AT5G07475
AT5G42590
AT4G29970
AT3G17550
AT2G27420
AT4G33465
AT4G22110
AT4G20810
AT5G49250
AT2G17310
AT5G55750
AT1G33610
AT4G39360
AT1G32910
AT5G27310
AT2G27935
AT1G58450
AT1G78460
AT5G38990
AT1G12200
AT4G00890
AT1G72490
AT1G66120
AT1G02950
AT4G20510
AT3G07540
AT5G40620
AT4G05430
AT4G00300
AT2G18820
AT5G16370
AT2G40910
AT1G26815
AT1G65880
AT3G22340
AT5G55135
AT5G18690
AT5G53740
AT4G24030
AT2G27535
AT5G56640
AT3G54340
AT3G04520
AT2G24030
AT2G21890
AT4G32215
AT3G01085
AT5G44300
AT5G59100
AT2G34870
AT4G01516
AT1G33860
AT2G16740
AT5G57090
AT1G09550
AT2G14560
AT1G62210
AT4G19800
AT3G43890
AT2G18340
AT3G30530
AT1G80730
AT1G30840
AT4G11780
AT5G13600
AT4G13310
AT1G80470
AT1G57830
AT1G21330
AT2G27520
AT3G42960
AT3G52820
AT3G12460
AT2G37370
AT1G11420
AT3G60647
AT5G42500
AT1G02550
AT5G37870
AT2G44810
AT5G18990
AT5G02110
AT4G30040
AT2G32470
AT3G43900
AT2G17960
AT1G55740
AT1G48730
AT4G38030
AT2G02010
AT4G10850
AT5G35110
AT4G28530
AT2G22590
AT1G53790
AT1G07175
AT2G23520
AT1G08990
AT3G55180
AT5G12000
AT2G48080
AT1G78840
AT4G24310
AT2G38120
AT4G01450
AT5G07490
AT5G37030
AT5G01900
AT5G54820
AT3G52740
AT3G18518
AT2G37610
AT1G05290
AT1G63205
AT5G41505
AT2G42350
AT1G34545
AT3G53290
AT2G41930
AT2G28710
AT5G22390
AT1G52130
AT5G60970
AT2G41400
AT5G14300
AT3G50290
AT3G03480
AT5G52900
AT5G43890
AT5G39540
AT4G19820
AT2G46140
AT2G04840
AT2G24740
AT1G47810
AT1G33550
AT2G02990
AT1G78260
AT4G18680
AT1G22720
AT4G38780
AT3G27480
AT3G47600
AT3G29680
AT1G51920
AT3G46330
AT5G50760
AT3G14060
AT5G03800
AT3G61680
AT4G17860
AT3G10590
AT2G34080
AT1G35290
AT1G45201
AT2G30370
AT4G29020
AT1G12805
AT3G13130
AT5G62660
AT1G29080
AT1G48990
AT1G08100
AT1G79370
AT3G46614
AT3G15534
AT1G59530
AT3G10572
AT3G13228
AT1G63295
AT5G58910
AT2G43150
AT5G40780
AT4G37420
AT5G53510
AT5G42690
AT3G44990
AT2G32860
AT1G57550
AT4G28850
AT5G22380
AT5G39370
AT5G38070
AT3G44980
AT1G73000
AT5G04120
AT4G23520
AT3G63230
AT1G63880
AT1G67710
AT3G43270
AT1G58310
AT1G49860
AT3G26815
AT1G67270
AT1G31620
AT1G49005
AT3G23190
AT1G18970
AT2G14670
AT5G62848
AT5G26630
AT3G23130
AT3G10340
AT5G52830
AT1G75490
AT4G33930
AT4G14780
AT2G22810
AT5G09370
AT4G16220
AT3G15920
AT1G68450
AT5G49630
AT1G66630
AT3G22345
AT3G05727
AT4G10310
AT4G23990
AT4G36820
AT5G35950
AT1G79680
AT5G38750
AT5G35770
AT5G14830
AT1G27020
AT2G46360
AT4G20590
AT3G19890
AT5G55250
AT4G20230
AT5G22250
AT1G78760
AT1G44542
AT3G48940
AT3G41762
AT5G17430
AT3G62220
AT5G10000
AT4G33710
AT2G19630
AT2G40920
AT1G20070
AT4G11770
AT2G25150
AT5G46610
AT1G30740
AT4G14730
AT3G50160
AT5G22180
AT3G47010
AT1G28430
AT2G19500
AT1G12190
AT2G29940
AT2G02020
AT3G06020
AT2G47880
AT2G28140
AT4G10600
AT1G62990
AT4G25040
AT3G17150
AT5G61110
AT1G13370
AT5G53290
AT2G36030
AT1G62560
AT5G41810
AT4G18980
AT3G62180
AT1G51490
AT4G37450
AT3G11250
AT3G44810
AT2G14692
AT4G37970
AT3G14480
AT1G58037
AT1G35330
AT1G09500
AT3G23030
AT3G13640
AT3G12500
AT2G21100
AT1G69870
AT3G21910
AT2G02080
AT1G24260
AT1G35545
AT5G25960
AT5G38030
AT1G60580
AT1G33760
AT5G56320
AT1G13430
AT1G32975
AT4G15350
AT2G23410
AT1G10380
AT5G63350
AT4G34250
AT5G47600
AT2G31432
AT2G42425
AT5G06790
AT3G63110
AT5G53610
AT3G13760
AT3G30725
AT2G27080
AT1G73560
AT1G22360
AT3G62690
AT1G07985
AT3G04200
AT5G66390
AT4G12050
AT2G15400
AT5G06250
AT2G04480
AT4G22485
AT4G33230
AT2G41240
AT1G47390
AT5G63580
AT4G30470
AT1G43640
AT1G72100
AT3G47870
AT5G41761
AT1G11230
AT3G51740
AT4G35150
AT3G17730
AT5G05598
AT5G52680
AT4G16810
AT3G48720
AT1G22210
AT3G16432
AT5G53250
AT1G44080
AT4G09190
AT2G31420
AT5G07930
AT4G13968
AT1G18050
AT1G14755
AT3G18660
AT5G27807
AT2G25370
AT2G21060
AT1G29140
AT4G03170
AT1G55110
AT3G22060
AT1G55420
AT1G14250
AT1G67775
AT1G73590
AT2G46495
AT4G11050
AT3G60900
AT3G22022
AT1G21470
AT2G34000
AT1G29195
AT5G06640
AT1G61105
AT1G66245
AT3G17320
AT3G55300
AT4G18870
AT1G62570
AT3G61280
AT1G43020
AT1G23350
AT4G12930
AT1G23660
AT1G35630
AT4G32378
AT3G15536
AT3G10460
AT4G28100
AT5G37220
AT1G56240
AT3G11920
AT5G52150
AT1G12130
AT1G67000
AT3G15700
AT2G37740
AT3G18670
AT1G04600
AT5G54365
AT2G18590
AT1G26945
AT2G23010
AT1G67870
AT2G28850
AT1G28230
AT1G06350
AT5G09750
AT1G66220
AT2G17060
AT3G45577
AT4G22400
AT4G02733
AT1G62710
AT1G26390
AT2G19000
AT1G28695
AT1G75160
AT1G10620
AT1G34047
AT1G66420
AT1G59660
AT3G11580
AT1G51820
AT5G54490
AT5G19040
AT2G47115
AT1G75940
AT4G13985
AT2G43890
AT4G15360
AT1G52460
AT3G28415
AT1G68390
AT3G29636
AT3G19200
AT1G08670
AT5G25250
AT3G21200
AT5G66840
AT3G50470
AT2G21840
AT5G15040
AT1G78370
AT4G17695
AT1G64360
AT4G04630
AT5G44220
AT5G43760
AT3G27415
AT3G13730
[truncated: 5,026 more rows]

## Sheet: t0 K27
AT5G16970
AT4G32100
AT1G30814
AT4G34580
AT4G03450
AT1G71695
AT1G12980
AT1G08135
AT1G29010
AT5G55650
AT1G23201
AT1G09030
AT5G19720
AT5G18450
AT2G25630
AT2G17600
AT5G46240
AT3G25717
AT5G35715
AT5G56110
AT2G21930
AT2G29300
AT4G25090
AT1G21310
AT2G18870
AT1G56250
AT5G04950
AT4G25980
AT5G25550
AT4G02740
AT5G23000
AT1G66852
AT4G30770
AT1G69810
AT1G72450
AT3G03272
AT3G12880
AT2G22960
AT5G53205
AT5G38950
AT1G65630
AT1G71390
AT1G47790
AT5G46260
AT4G19720
AT3G03350
AT3G50870
AT3G14500
AT4G19380
AT1G49500
AT1G28460
AT5G37667
AT3G49150
AT3G09680
AT1G51810
AT3G59590
AT1G25988
AT4G22235
AT2G16970
AT3G46920
AT3G13820
AT2G15080
AT3G49770
AT3G13437
AT2G40802
AT2G33130
AT5G22720
AT1G52200
AT1G54410
AT1G57800
AT4G23200
AT5G19580
AT5G52690
AT1G08080
AT5G50060
AT1G75550
AT1G71890
AT2G31920
AT4G26560
AT4G23670
AT3G28780
AT4G20560
AT4G02317
AT2G31080
AT2G27700
AT2G40210
AT5G57625
AT5G16285
AT5G50011
AT5G24950
AT3G06890
AT1G05250
AT3G44560
AT1G67260
AT4G31950
AT1G10010
AT1G24575
AT5G54610
AT3G27970
AT5G26250
AT3G09990
AT5G20560
AT5G12990
AT4G26530
AT2G02300
AT1G74000
AT5G57670
AT3G05960
AT1G55580
AT5G62750
AT2G45434
AT1G53340
AT2G16130
AT3G17140
AT5G50500
AT3G57510
AT2G47560
AT1G56540
AT4G11880
AT2G37390
AT1G77150
AT4G27400
AT5G09500
AT1G69860
AT2G38390
AT1G43650
AT5G03810
AT1G51230
AT3G26470
AT1G09960
AT3G20760
AT4G33600
AT1G51990
AT5G23030
AT1G05562
AT5G11830
AT3G29580
AT2G38380
AT2G33520
AT1G53625
AT1G63360
AT5G55045
AT4G16162
AT4G34800
AT4G28340
AT3G14510
AT1G78710
AT3G57620
AT3G07970
AT4G28130
AT5G08070
AT3G08700
AT5G41510
AT2G40160
AT5G06610
AT2G22470
AT5G22870
AT2G01940
AT1G06330
AT2G02310
AT4G11020
AT3G16430
AT1G51440
AT3G20950
AT1G62978
AT5G05340
AT2G41810
AT4G05110
AT3G44080
AT5G56920
AT1G47317
AT5G38000
AT1G80840
AT3G28320
AT2G23160
AT5G44630
AT5G05810
AT2G40900
AT5G02340
AT2G46440
AT4G15280
AT4G01925
AT5G18270
AT5G24100
AT1G71300
AT2G32210
AT4G34790
AT3G51400
AT4G23590
AT1G48690
AT4G15417
AT4G13560
AT3G19920
AT1G49570
AT5G62830
AT2G45130
AT2G39415
AT1G68470
AT1G13609
AT5G58400
AT5G50800
AT1G48800
AT1G47980
AT5G40680
AT5G52750
AT4G35020
AT2G38910
AT3G62780
AT1G26400
AT4G13090
AT3G15910
AT3G26240
AT4G16230
AT3G41768
AT1G11520
AT1G50990
AT2G25130
AT3G55100
AT5G22970
AT2G36325
AT1G22150
AT1G51320
AT5G24240
AT1G26700
AT1G07500
AT1G70260
AT2G40750
AT1G61563
AT1G23145
AT4G25330
AT3G09920
AT2G40330
AT2G02540
AT1G10250
AT3G12910
AT1G55650
AT1G51850
AT3G25730
AT2G03720
AT1G45191
AT2G28960
AT3G47210
AT4G39750
AT2G04842
AT3G63360
AT3G05450
AT1G55928
AT3G18010
AT4G18550
AT3G01250
AT5G49520
AT3G46070
AT5G37180
AT1G18810
AT3G01840
AT1G09930
AT1G10585
AT2G45580
AT2G31360
AT3G23090
AT4G28510
AT2G01830
AT2G02450
AT4G34750
AT4G37690
AT3G28420
AT5G05050
AT4G30975
AT1G54560
AT4G30420
AT3G45920
AT3G02910
AT2G27430
AT3G36659
AT1G20320
AT4G33040
AT1G66880
AT4G33020
AT1G51790
AT5G24050
AT3G13010
AT2G32360
AT1G05260
AT1G64110
AT4G27415
AT3G61920
AT2G20350
AT5G23790
AT5G35660
AT3G44970
AT2G14210
AT3G02242
AT2G41860
AT3G54410
AT2G15600
AT3G23270
AT1G52400
AT5G16567
AT5G24790
AT5G41490
AT1G10770
AT4G32780
AT5G14740
AT2G16580
AT5G47550
AT3G50390
AT1G14880
AT5G26147
AT4G14368
AT1G11190
AT1G03890
AT2G21220
AT4G35725
AT5G61630
AT3G23630
AT3G14360
AT1G69792
AT5G43066
AT1G19630
AT2G02930
AT2G03550
AT4G10540
AT5G38420
AT3G22235
AT2G39850
AT1G65681
AT5G37910
AT4G21030
AT2G18720
AT1G74620
AT5G05420
AT3G23060
AT4G05130
AT5G11320
AT3G14880
AT5G66340
AT2G16190
AT1G50310
AT3G45600
AT3G25573
AT1G49430
AT3G04570
AT5G59120
AT1G28660
AT2G01554
AT5G40560
AT3G28917
AT3G14820
AT2G44110
AT4G30410
AT4G27140
AT5G04347
AT3G03280
AT3G43829
AT2G36420
AT1G47480
AT4G37580
AT1G22900
AT5G11050
AT3G01680
AT5G61700
AT3G49470
AT1G35180
AT1G35210
AT3G03341
AT1G63030
AT5G07160
AT5G35338
AT3G50120
AT4G16780
AT1G53350
AT1G69818
AT1G66440
AT2G19425
AT3G30724
AT5G42250
AT1G66320
AT5G16460
AT1G33890
AT2G20750
AT3G29720
AT5G65590
AT1G70080
AT2G12462
AT1G47320
AT4G34970
AT5G60470
AT4G33610
AT4G01360
AT2G24660
AT5G44020
AT2G28760
AT4G23882
AT4G18940
AT1G67590
AT1G69080
AT1G31400
AT3G08040
AT5G24540
AT1G73300
AT5G20260
AT1G30530
AT2G35270
AT5G52740
AT1G65750
AT5G14070
AT5G44870
AT2G02060
AT2G17610
AT2G30130
AT1G08630
AT5G50115
AT4G29640
AT2G03300
AT3G52980
AT1G04500
AT1G56500
AT1G21130
AT5G48430
AT5G18130
AT2G39175
AT4G09030
AT5G61740
AT4G33220
AT4G24660
AT4G16590
AT3G48550
AT4G29580
AT5G50190
AT4G21600
AT1G26796
AT5G48710
AT1G26800
AT5G09805
AT4G05360
AT3G47480
AT3G03780
AT1G68500
AT1G43886
AT2G16575
AT5G41250
AT3G44220
AT3G33084
AT3G28910
AT1G77760
AT3G24780
AT1G24062
AT5G35600
AT1G53820
AT5G56620
AT5G07040
AT1G51900
AT3G26782
AT4G22090
AT1G20350
AT1G22370
AT4G15320
AT1G32020
AT1G13245
AT1G53265
AT4G35640
AT4G08160
AT1G52695
AT1G04180
AT1G64400
AT4G17920
AT5G54062
AT2G19890
AT2G45400
AT1G14950
AT1G55660
AT1G10260
AT1G33750
AT1G61270
AT4G16748
AT2G19800
AT4G00120
AT1G52000
AT1G37130
AT1G31310
AT3G55677
AT4G28365
AT2G02580
AT5G55560
AT5G37860
AT3G14970
AT2G25820
AT4G02300
AT2G14206
AT5G10030
AT2G25330
AT4G08770
AT4G03565
AT1G72140
AT2G21140
AT1G05291
AT2G01300
AT1G14420
AT4G15460
AT5G38120
AT2G36890
AT3G16650
AT3G16590
AT5G39200
AT5G37730
AT5G14345
AT5G63660
AT2G35960
AT2G32540
AT3G10845
AT1G78476
AT1G13300
AT2G46720
AT2G28970
AT4G11655
AT5G03210
AT1G47350
AT3G56390
AT3G19660
AT2G45830
AT5G46320
AT1G24010
AT4G28395
AT4G30280
AT1G21300
AT2G03250
AT1G32660
AT3G04990
AT5G38590
AT1G62420
AT3G46613
AT5G57620
AT4G03620
AT3G46840
AT3G41979
AT2G45110
AT1G09790
AT5G65100
AT1G60270
AT1G25400
AT5G17795
AT3G06370
AT5G49240
AT1G43140
AT2G01023
AT5G45970
AT2G23900
AT1G49770
AT3G28330
AT1G51300
AT1G56150
AT3G27500
AT2G02120
AT1G75520
AT1G53890
AT5G01370
AT4G11190
AT5G26920
AT4G37950
AT5G01734
AT5G57130
AT3G47400
AT4G19810
AT4G13345
AT5G47450
AT4G36250
AT3G61500
AT1G33080
AT5G66815
AT2G27930
AT1G64290
AT3G24240
AT1G56300
AT4G33560
AT3G51171
AT2G34204
AT3G50740
AT3G19600
AT2G20080
AT3G60100
AT1G62810
AT1G68280
AT3G58310
AT1G05580
AT1G50880
AT4G14465
AT5G39420
AT3G46086
AT1G44830
AT4G27950
AT4G15396
AT3G32030
AT4G23370
AT5G08240
AT3G01080
AT1G61630
AT1G28590
AT5G38450
AT1G24145
AT3G55580
AT1G68170
AT4G14810
AT5G17860
AT4G30880
AT2G44030
AT2G45650
AT5G40020
AT2G30940
AT3G06962
AT4G13240
AT5G28490
AT1G51240
AT3G59160
AT3G25655
AT5G40280
AT3G04010
AT1G23270
AT4G15910
AT3G51190
AT5G65850
AT5G62320
AT5G23950
AT2G01340
AT5G55080
AT2G47040
AT2G30770
AT3G48231
AT2G28630
AT3G53770
AT2G03290
AT3G61150
AT4G25410
AT3G01331
AT3G12970
AT5G44330
AT5G05430
AT4G26280
AT3G17260
AT2G39320
AT1G70270
AT5G03552
AT1G34580
AT5G56200
AT2G26050
AT4G00180
AT4G09110
AT5G24530
AT3G45940
AT5G65165
AT1G15640
AT5G67060
AT3G16530
AT1G56040
AT5G65730
AT4G16540
AT4G24300
AT4G18390
AT5G48070
AT4G22510
AT3G11435
AT3G23850
AT3G21980
AT2G34140
AT1G68825
AT3G15370
AT3G50755
AT3G11430
AT1G49100
AT2G45450
AT5G07630
AT2G26695
AT2G23880
AT1G02580
AT4G15750
AT2G44560
AT4G10520
AT3G04290
AT2G16005
AT2G36190
AT4G33330
AT1G02650
AT3G11150
AT2G29790
AT3G03540
AT4G14250
AT3G09940
AT3G51860
AT1G65485
AT2G25940
AT5G17820
AT5G66400
AT5G46960
AT3G23010
AT3G45560
AT5G02100
AT5G01320
AT5G39690
AT5G37210
AT1G52140
AT5G53010
AT1G60410
AT3G60120
AT3G53640
AT2G16586
AT4G35733
AT3G46720
AT2G45760
AT3G01240
AT1G49110
AT3G43860
AT5G24560
AT1G71050
AT1G77650
AT5G25340
AT5G36925
AT1G58360
AT5G43840
AT5G54030
AT5G10180
AT5G58390
AT5G37320
AT5G33355
AT1G19620
AT2G31910
AT2G29040
AT5G07540
AT2G34610
AT1G66960
AT2G30750
AT4G11393
AT3G09520
AT2G37010
AT5G42180
AT5G43610
AT2G46640
AT3G22800
AT1G21326
AT2G27670
AT2G41945
AT1G68230
AT1G63370
AT4G18910
AT2G21490
AT4G15310
AT5G41570
AT1G06800
AT5G26262
AT2G39530
AT1G52830
AT3G13830
AT1G68320
AT1G20800
AT2G24700
AT2G19420
AT4G39010
AT1G45015
AT4G09600
AT1G23160
AT2G29060
AT3G57540
AT1G65760
AT2G25160
AT3G42180
AT5G19260
AT4G13290
AT3G27720
AT3G13710
AT1G48810
AT2G03500
AT2G47260
AT1G03170
AT3G01880
AT1G76830
AT1G04280
AT4G26950
AT5G57650
AT3G54700
AT1G55020
AT5G41500
AT4G16260
AT4G04490
AT3G20898
AT4G20550
AT3G55240
AT1G02790
AT4G21840
AT3G26934
AT1G47389
AT2G31110
AT4G27170
AT2G34925
AT4G33120
AT1G79420
AT2G24800
AT1G52070
AT3G17060
AT1G33280
AT5G65980
AT4G08450
AT5G57785
AT3G49200
AT1G59810
AT1G28306
AT2G31020
AT1G32650
AT5G41590
AT4G16235
AT4G05170
AT5G42600
AT4G12890
AT3G02920
AT5G09970
AT1G78820
AT2G27570
AT1G03790
AT1G68750
AT1G22065
AT2G16535
AT5G56820
AT2G43060
AT4G18920
AT5G56490
AT5G22460
AT3G49570
AT5G07690
AT5G05120
AT2G18880
AT4G19700
AT1G02220
AT3G29195
AT5G64790
AT4G33280
AT5G65800
AT4G13610
AT1G56680
AT5G07760
AT5G36870
AT5G57780
AT4G00390
AT2G37430
AT3G09400
AT2G43880
AT1G22140
AT1G77200
AT5G23395
AT4G02270
AT5G57720
AT3G49190
AT1G20860
AT1G18200
AT3G44300
AT1G02965
AT3G26290
AT5G14011
AT1G28160
AT2G23400
AT2G47770
AT3G04420
AT5G66740
AT2G14095
AT5G60810
AT4G01180
AT5G55856
AT5G43860
AT2G28725
AT3G54450
AT5G19600
AT2G02340
AT4G01985
AT5G63600
AT5G50160
AT4G12500
AT4G00315
AT2G32890
AT2G23130
AT1G71770
AT4G30290
AT1G63245
AT5G54210
AT4G30460
AT2G15042
AT2G34880
AT4G35165
AT3G04070
AT5G22430
AT4G12280
AT2G14220
AT5G25330
AT5G19530
AT5G05113
AT3G23220
AT1G07720
AT3G20580
AT2G02650
AT3G07870
AT1G26310
AT2G38530
AT5G17950
AT2G31082
AT4G10865
AT3G59600
AT1G59453
AT1G26950
AT3G60570
AT3G60790
AT2G31560
AT1G75930
AT1G77700
AT4G32580
AT1G54550
AT4G22517
AT3G61900
AT2G03830
AT3G16670
AT3G29050
AT5G16235
AT4G05180
AT3G19070
AT1G28650
AT1G18760
AT1G78470
AT2G01990
AT3G46050
AT5G38435
AT2G36750
AT2G37130
AT1G52827
AT4G02870
AT4G23610
AT1G06280
AT5G01680
AT3G10080
AT1G08465
AT1G32970
AT5G07475
AT5G42590
AT4G29970
AT3G17550
AT2G39010
AT4G33465
AT4G22110
AT4G20810
AT5G49250
AT2G17310
AT5G55750
AT1G32910
AT5G27310
AT2G27935
AT1G58450
AT1G78460
AT4G12220
AT1G72490
AT4G05430
AT2G40910
AT1G26815
AT1G65880
AT3G22340
AT5G18690
AT5G63087
AT2G27535
AT2G21890
AT3G08870
AT1G29590
AT3G01085
AT2G34870
AT1G33860
AT2G16740
AT1G09550
AT4G19800
AT3G43890
AT3G30530
AT1G80730
AT4G13310
AT1G21330
AT2G37370
AT5G18990
AT5G02110
AT1G57980
AT2G32470
AT3G43900
AT2G17960
AT2G15580
AT4G38030
AT4G10850
AT5G35110
AT5G12000
AT1G78840
AT3G46480
AT2G03750
AT5G37030
AT5G54820
AT3G52740
AT2G37610
AT2G42350
AT2G28710
AT1G44940
AT5G22390
AT1G52130
AT5G52900
AT5G39540
AT4G19820
AT2G24740
AT1G47810
AT1G33550
AT4G23150
AT3G27480
AT3G29680
AT1G51920
AT4G17860
AT1G35290
AT3G13130
AT3G19030
AT1G23050
AT2G38325
AT1G48990
AT1G29080
AT1G08100
AT3G15534
AT5G03710
AT3G46650
AT3G45790
AT1G63295
AT5G35550
AT2G43150
AT1G63420
AT4G37420
AT5G53510
AT5G22380
AT5G38070
AT1G73000
AT5G04120
AT4G23520
AT3G63230
AT1G63880
AT2G46710
AT3G43270
AT1G79110
AT1G58420
AT1G49860
AT3G26815
AT3G25270
AT1G49005
AT2G01280
AT3G23190
AT1G18970
AT2G14670
AT5G62848
AT3G23130
AT3G10340
AT5G52830
AT1G72430
AT2G44195
AT2G22810
AT1G11210
AT5G49630
AT1G66630
AT3G05727
AT3G09530
AT4G23990
AT1G31640
AT2G46360
AT4G20590
AT5G36660
AT4G20230
AT5G22250
AT1G78760
AT1G44542
AT5G17430
AT5G10000
AT4G23250
AT5G46610
AT1G28430
AT2G19500
AT1G12190
AT5G18860
AT3G06020
AT2G47880
AT2G07560
AT2G28140
AT5G03204
AT3G17150
AT3G58290
AT1G13370
AT2G36030
AT3G62180
AT1G51490
AT2G18320
AT3G14480
AT1G58037
AT1G69870
AT2G02080
AT1G24260
AT5G63350
AT1G68960
AT2G31432
AT2G42425
AT5G06790
AT5G53610
AT3G13760
AT1G22360
AT3G62690
AT1G75040
AT1G07985
AT3G04200
AT5G66390
AT4G12050
AT3G11680
AT2G15400
AT2G04480
AT1G18520
AT1G11230
AT1G67640
AT4G35150
AT4G09930
AT5G52680
AT3G48720
AT1G22210
AT1G44080
AT5G07930
AT4G18770
AT1G18050
AT1G14755
AT5G27807
AT2G18970
AT1G29140
AT4G03170
AT1G55110
AT3G22060
AT1G55420
AT1G73590
AT4G11050
AT3G60900
AT1G57730
AT1G21470
AT1G61105
AT5G25310
AT2G34800
AT3G17320
AT2G04038
AT1G53880
AT1G65610
AT4G18870
AT4G35660
AT1G64380
AT4G16990
AT3G61280
AT1G43020
AT4G12930
AT1G23660
AT1G35630
AT4G32378
AT3G15536
AT3G10460
AT4G28100
AT5G37220
AT1G56240
AT4G09540
AT5G52150
AT1G67000
AT2G37740
AT3G18670
AT2G46430
AT2G18590
AT1G26945
AT2G23010
AT1G67870
AT5G06270
AT2G28850
AT1G06350
AT5G09750
AT1G66220
AT2G17060
AT3G45577
AT4G22400
AT4G02733
AT3G26855
AT1G26390
AT2G19000
AT1G28695
AT1G75160
AT2G30230
AT1G51820
AT5G19040
AT4G15360
AT1G52460
AT1G68390
AT3G29636
AT5G25250
AT2G21840
AT5G15040
AT1G78370
AT4G17695
AT5G59720
AT5G55330
AT4G22050
AT3G49280
AT3G57260
AT3G21770
AT3G18957
AT5G40420
AT4G20530
AT1G80050
AT1G54750
AT3G09285
AT1G28130
AT3G43960
AT1G50090
AT5G11590
AT1G62280
AT5G28690
AT3G04765
AT5G39471
AT5G66300
AT3G45110
AT1G73870
AT5G23380
AT2G26870
AT2G31945
AT4G32540
AT3G06778
AT5G62060
AT1G35490
AT1G51220
AT1G49260
AT3G50480
AT1G12010
AT4G24010
AT3G50570
AT3G26830
AT2G36970
AT1G19640
AT2G22930
AT3G52790
AT3G56890
AT5G50950
AT1G22380
AT4G33860
AT2G28315
AT1G15840
AT4G24000
AT1G18290
AT5G46600
AT2G41870
AT2G02250
AT5G53780
AT2G24950
AT2G03180
AT1G68520
AT3G45755
AT1G66390
AT5G19100
AT1G19890
AT2G37180
AT3G27990
AT1G54575
AT2G15029
AT1G65310
AT5G12280
AT5G16740
AT5G54700
AT2G34320
AT3G53060
AT4G36700
AT1G63870
AT4G31470
AT2G18500
AT5G23212
AT4G12960
AT5G50120
AT2G24735
AT1G73965
AT1G80820
AT1G58160
AT1G48530
AT5G50010
AT5G10220
AT2G43580
AT5G39900
AT5G50040
AT5G26800
AT3G22700
AT2G33160
AT4G18900
AT3G53305
AT5G58890
AT2G24710
AT2G37090
AT2G16890
AT1G30190
AT2G26865
AT1G14550
AT1G46120
AT3G19310
AT1G62450
AT3G04170
AT1G79130
AT5G28515
AT4G08360
AT3G21050
AT1G58340
AT3G53980
AT1G44090
AT1G70840
AT2G35612
AT3G47750
AT3G13435
AT1G10880
AT5G08695
AT5G07260
AT5G08391
AT2G44581
AT2G28590
AT3G12850
AT5G42280
AT2G26690
AT1G63580
AT4G16160
AT1G07610
AT5G12270
AT4G22650
AT2G34340
AT5G65158
AT3G51895
AT3G12977
AT5G46830
AT1G77110
AT1G16705
AT5G02260
AT4G09740
AT3G10510
AT5G38440
AT1G69480
AT5G50260
AT2G02290
AT1G71520
AT3G26820
AT3G19550
AT3G50460
AT3G60720
AT2G25680
AT1G07850
AT1G35190
AT3G21840
AT4G06658
AT3G27840
AT1G53120
AT3G57270
AT1G03620
AT1G26790
AT5G41720
AT2G23840
AT1G74110
AT5G49130
AT1G47360
AT1G65770
AT4G29450
AT1G13600
AT5G44120
AT1G18390
AT1G26797
AT5G62510
AT2G39518
AT1G28190
AT3G17230
AT4G01490
AT5G48060
AT4G18720
AT5G60610
AT5G44345
AT3G04190
AT5G05300
AT1G08090
AT5G20790
AT4G25990
AT1G66460
AT1G72580
AT3G24535
AT1G74080
AT5G53100
AT1G12960
AT1G65360
AT4G05100
AT4G01190
AT4G12330
AT1G71030
AT5G16170
AT5G23220
AT3G47250
AT3G27510
AT4G03610
AT1G21910
AT1G33090
AT3G60700
AT3G07850
AT4G30140
AT1G66190
AT4G32880
AT3G25165
AT1G12940
AT4G22170
AT1G03990
AT4G22530
AT4G19925
AT3G23960
AT5G54745
AT5G54400
AT3G21880
AT1G44318
AT1G70880
AT4G01520
AT5G38344
AT4G19250
AT1G12180
AT1G71002
AT1G18780
AT3G49980
AT5G19560
AT3G16800
AT2G34700
AT5G25430
AT1G15330
AT1G19930
AT4G23360
AT3G52535
AT2G31470
AT2G28056
AT3G45570
AT3G21320
AT3G41761
AT4G18990
AT2G29490
AT2G42530
AT4G00885
AT1G11770
AT1G10220
AT5G55855
AT3G62070
AT5G05250
AT3G60270
AT2G48130
AT2G23230
AT1G22120
AT1G52050
AT5G24910
AT5G08150
AT5G03010
AT3G49780
AT5G15110
AT3G14950
AT2G19360
AT3G23250
AT3G20610
AT5G50130
AT3G56730
AT2G20870
AT5G67430
AT2G42410
AT2G13810
AT1G70560
AT1G32170
AT1G25530
AT4G27160
AT4G25810
AT5G53870
AT2G33190
AT1G29160
AT1G62490
AT5G20100
AT2G05400
AT4G33420
AT5G63225
AT5G56300
AT2G42840
AT2G34540
AT1G24625
AT5G37660
AT2G45190
AT1G13200
AT4G35820
AT5G45880
AT4G27420
AT1G02620
AT3G04320
AT3G14810
AT2G46880
AT1G64000
AT4G38530
AT1G33930
AT2G28180
AT2G47550
AT2G46375
AT4G20235
AT5G07560
AT4G33900
AT1G35250
AT3G20880
AT2G18490
AT4G28397
AT1G52700
AT1G60986
AT4G34210
AT2G37540
AT3G10720
AT5G46270
AT4G04080
AT3G29430
AT3G27416
AT3G26930
AT3G16680
AT5G25320
AT2G30430
AT3G21210
AT2G36560
AT1G62410
AT1G76210
AT3G28915
AT4G36930
AT1G12064
AT2G30290
AT5G27380
AT2G43745
AT2G43530
AT3G28070
AT2G34360
AT5G17980
AT1G17710
AT5G67450
AT1G14240
AT1G11250
AT3G14362
AT4G01780
AT2G31425
AT5G43110
AT2G03010
AT5G42860
AT1G35910
AT4G05475
AT5G60010
AT1G76800
AT3G09270
AT3G45780
AT2G15010
AT1G09240
AT4G15390
AT1G67810
AT1G70850
AT2G44925
AT3G53232
AT1G56360
AT4G22490
AT3G23560
AT5G01120
AT3G19710
AT1G18835
AT5G46050
AT1G57570
AT4G21850
AT3G27400
AT1G06020
AT2G39590
AT4G15740
AT1G11915
AT3G22730
AT1G53023
AT5G61890
AT1G33440
AT1G75590
AT4G29930
AT1G72290
AT5G06730
AT1G63835
AT5G19880
AT5G37920
AT2G25990
AT3G62380
AT4G19260
AT4G15690
AT4G37770
AT3G49051
AT5G19730
AT3G19002
AT2G43570
AT3G47090
AT5G22990
AT3G26812
AT4G01830
AT5G47220
AT1G56120
AT5G02920
AT4G24980
AT3G60090
AT2G18150
AT1G64060
AT5G46520
AT5G59090
AT3G62230
AT1G41830
AT2G26580
AT4G31900
AT1G08440
AT1G34490
AT3G63095
AT3G45760
AT3G01326
AT2G23220
AT4G24130
AT1G17430
AT1G43800
AT5G16030
AT5G04360
AT5G18600
AT1G44608
AT5G43340
AT3G16380
AT2G36710
AT1G12600
AT2G41100
AT3G28380
AT2G31750
AT1G08150
AT3G20160
AT5G01075
AT2G23171
AT5G03600
AT4G25590
AT4G21895
AT5G64770
AT1G77080
AT3G13229
AT5G04330
AT1G69890
AT1G15610
AT5G51310
AT5G02370
AT5G12910
AT4G15093
AT5G08090
AT3G20210
AT5G26260
AT1G48720
AT4G12470
AT2G18010
AT1G09932
AT3G22050
AT4G08620
AT4G26483
AT1G15460
AT4G30970
AT2G15260
AT4G10640
AT1G11920
AT5G07550
AT2G40610
AT1G66970
AT4G08750
AT1G48000
AT2G35770
AT3G50510
AT3G19160
AT1G20135
AT1G62700
AT3G49020
AT2G05720
AT3G56060
AT1G72220
AT1G23210
AT1G49320
AT1G66400
AT1G58280
AT5G06080
AT2G01780
AT2G25735
AT1G60320
AT4G13490
AT1G65300
AT4G26250
AT2G29320
AT2G35080
AT4G15735
AT1G14780
AT1G31000
AT3G27785
AT1G47405
AT3G19000
AT4G30230
AT1G05310
AT5G59930
AT3G14780
AT1G28330
AT4G30120
AT5G48420
AT5G21280
AT4G30980
AT3G21890
AT2G31180
AT3G46340
AT1G13620
AT3G59180
AT5G17740
AT5G39470
AT1G43010
AT2G01008
AT2G39060
AT4G21690
AT3G48208
AT4G14370
AT5G07430
AT3G01530
AT1G01630
AT4G11521
AT2G16990
AT3G43670
AT1G05577
AT1G30930
AT1G18790
AT1G66270
AT5G62340
AT3G52450
AT1G11990
AT3G59230
AT4G12920
AT1G14120
AT3G59010
AT3G57460
AT1G26870
AT3G29060
AT1G20080
AT5G15175
AT1G13610
AT1G18350
AT1G08500
AT5G56560
AT2G22155
AT5G46877
AT2G40670
AT3G25420
AT3G12710
AT1G21430
AT5G40050
AT2G36440
AT1G48060
AT2G01021
AT1G58270
AT5G22910
AT4G28720
AT4G12510
AT2G23260
AT2G42040
AT4G28800
AT5G24410
AT5G05910
AT3G60000
AT2G18480
AT4G24644
AT3G47710
AT1G70940
AT1G06810
AT1G68568
AT5G37381
AT5G50200
AT3G44096
AT5G24580
AT5G46690
AT3G55540
AT2G41690
AT2G17090
AT5G52340
AT1G65090
AT3G50190
AT2G27070
AT1G34560
AT1G33110
AT3G55110
AT1G29280
AT5G52140
AT3G11300
AT4G04090
AT2G36695
AT4G11930
AT2G41280
AT3G59930
AT3G17200
AT2G08986
AT3G46160
AT1G52290
AT3G24216
AT4G16050
AT5G20860
AT3G08810
AT5G38800
AT2G38304
AT2G02240
AT3G44670
AT3G47360
AT4G39060
AT2G32690
AT2G21000
AT5G55507
AT1G21930
AT3G52330
AT1G32713
AT1G78860
AT5G25180
AT5G63450
AT1G62340
AT3G55512
AT5G48940
AT3G45250
AT1G21010
AT1G61688
AT3G13960
AT1G55440
AT2G22990
AT3G56230
AT2G17290
AT1G62220
AT3G13280
AT5G20370
AT1G24147
AT3G26270
AT2G32788
AT3G20940
AT1G35890
AT3G53300
AT1G23910
AT4G38000
AT5G62330
AT3G48960
AT1G48510
AT5G41290
AT1G24520
AT1G66370
AT1G09026
AT2G10450
AT1G58225
AT2G28460
AT4G36100
AT1G47603
AT5G52720
AT5G54150
AT5G58465
AT1G34245
AT1G57565
AT3G51600
AT5G41300
AT1G47860
AT4G20800
AT2G24850
AT1G35255
AT1G24020
AT5G48950
AT3G29034
AT2G16230
AT4G18425
AT1G13400
AT1G52190
AT2G24510
AT3G28990
AT1G30040
AT5G24825
AT1G28360
AT4G16640
AT4G21362
AT5G48130
AT1G72210
AT4G29370
AT1G02070
AT5G05965
AT5G43180
AT4G37840
AT3G01940
AT5G02580
AT2G19450
AT5G17120
AT3G13630
AT5G38980
AT5G01190
AT4G07820
AT2G36210
AT4G25950
AT4G14540
AT1G59940
AT1G32585
AT1G57943
AT2G29740
AT3G06390
AT5G39280
AT3G42880
AT4G36280
AT4G12980
AT1G21550
AT3G11110
AT2G27389
AT5G37500
AT5G02510
AT2G16380
AT1G15550
AT5G67390
AT1G02340
AT5G59370
AT4G30960
AT2G01520
AT2G36120
AT3G51030
AT3G25790
AT1G71970
AT2G41910
AT4G22800
AT3G44790
AT2G18670
AT4G34600
AT5G55930
AT5G43935
AT5G15725
AT4G29610
AT3G05300
AT4G22080
AT1G26320
AT3G10990
AT2G45360
AT4G01500
AT2G01660
AT1G67025
AT2G14760
AT1G64160
AT1G51780
AT5G03680
AT5G06839
AT1G63200
AT2G31430
AT3G26610
AT2G34010
AT4G28670
AT2G22760
AT2G04050
AT4G02871
AT2G43871
AT1G66160
AT1G73120
AT3G47510
AT4G16000
AT5G46540
AT1G48820
AT3G58190
AT3G27809
AT1G18075
AT1G73680
AT3G10600
AT2G26720
AT5G65380
AT1G02810
AT5G58500
AT2G31700
AT1G17950
AT1G21990
AT5G54360
AT1G29110
AT2G29370
AT4G11810
AT4G20200
AT3G10116
AT3G10280
AT3G21240
AT1G73580
AT1G22651
AT5G38580
AT3G46410
AT2G44070
AT1G53815
AT1G53640
AT2G32200
AT5G38130
AT1G69120
AT1G23760
AT2G26420
AT1G26350
AT3G55900
AT1G64910
AT2G33670
AT2G04170
AT1G32510
AT5G53720
AT5G17090
AT2G14080
AT1G62035
AT5G42430
AT2G40370
AT5G37950
AT5G42510
AT1G28304
AT5G26080
AT1G78090
AT2G32270
AT2G26160
AT4G35400
AT2G35585
AT5G54585
AT3G54990
AT3G17152
AT5G17720
[truncated: 6,273 more rows]

## Sheet: t2 K27
AT5G16970
AT4G32100
AT1G30814
AT4G34580
AT4G03450
AT1G71695
AT1G12980
AT1G08135
AT1G29010
AT5G55650
AT1G23201
AT1G09030
AT5G19720
AT5G18450
AT2G25630
AT2G17600
AT3G25717
AT5G35715
AT5G56110
AT2G21930
AT4G25090
AT1G21310
AT2G18870
AT1G56250
AT5G04950
AT4G25980
AT5G25550
AT4G02740
AT5G23000
AT1G66852
AT4G30770
AT1G69810
AT1G72450
AT3G03272
AT3G12880
AT2G22960
AT5G38950
AT1G65630
AT1G71390
AT1G47790
AT5G46260
AT4G19720
AT3G03350
AT3G50870
AT3G14500
AT4G19380
AT1G49500
AT1G28460
AT5G37667
AT3G49150
AT3G09680
AT1G51810
AT3G59590
AT1G25988
AT4G22235
AT3G63470
AT2G16970
AT1G79700
AT3G46920
AT3G13820
AT2G15080
AT3G49770
AT3G13437
AT2G40802
AT2G33130
AT5G22720
AT1G52200
AT1G54410
AT1G57800
AT4G23200
AT5G19580
AT5G52690
AT1G08080
AT5G50060
AT1G75550
AT1G71890
AT2G31920
AT4G26560
AT4G23670
AT3G28780
AT4G20560
AT4G02317
AT2G31080
AT2G27700
AT2G40210
AT5G57625
AT5G16285
AT5G24950
AT3G06890
AT1G05250
AT3G44560
AT1G67260
AT4G31950
AT1G10010
AT1G24575
AT5G54610
AT3G27970
AT5G26250
AT3G09990
AT5G20560
AT5G12990
AT4G26530
AT2G02300
AT1G74000
AT5G57670
AT3G05960
AT1G55580
AT5G62750
AT2G45434
AT1G53340
AT2G16130
AT3G17140
AT5G50500
AT3G57510
AT2G47560
AT1G56540
AT4G11880
AT2G37390
AT1G77150
AT4G27400
AT2G19440
AT5G09500
AT1G69860
AT2G38390
AT1G43650
AT5G03810
AT1G51230
AT3G26470
AT1G09960
AT3G20760
AT4G33600
AT1G51990
AT5G23030
AT1G05562
AT5G11830
AT3G29580
AT2G38380
AT2G33520
AT1G53625
AT1G27180
AT1G63360
AT4G16162
AT4G34800
AT4G28340
AT3G14510
AT1G78710
AT3G57620
AT3G07970
AT4G28130
AT5G08070
AT3G08700
AT5G41510
AT2G40160
AT5G06610
AT2G22470
AT5G22870
AT2G01940
AT1G06330
AT2G02310
AT4G11020
AT3G16430
AT1G51440
AT3G20950
AT1G62978
AT5G05340
AT2G41810
AT4G05110
AT3G44080
AT5G56920
AT1G47317
AT5G38000
AT1G80840
AT3G28320
AT2G23160
AT5G44630
AT5G05810
AT2G40900
AT5G02340
AT2G46440
AT4G15280
AT4G01925
AT5G18270
AT5G24100
AT1G71300
AT2G32210
AT4G34790
AT3G51400
AT4G23590
AT1G48690
AT4G15417
AT4G13560
AT3G19920
AT1G49570
AT5G62830
AT2G45130
AT2G39415
AT1G68470
AT1G13609
AT5G58400
AT5G50800
AT1G48800
AT1G47980
AT5G40680
AT5G52750
AT4G35020
AT2G38910
AT3G62780
AT1G26400
AT4G13090
AT3G15910
AT3G26240
AT4G16230
AT1G11520
AT1G50990
AT2G25130
AT3G55100
AT5G22970
AT2G36325
AT1G22150
AT1G51320
AT5G24240
AT1G26700
AT1G07500
AT1G70260
AT2G40750
AT1G61563
AT1G23145
AT4G25330
AT3G09920
AT2G40330
AT2G02540
AT1G10250
AT3G12910
AT1G55650
AT1G51850
AT3G25730
AT2G03720
AT1G45191
AT2G28960
AT3G47210
AT4G39750
AT2G04842
AT3G63360
AT3G05450
AT1G55928
AT3G18010
AT4G18550
AT3G01250
AT5G49520
AT3G46070
AT5G37180
AT1G18810
AT3G01840
AT1G09930
AT1G10585
AT2G45580
AT2G31360
AT3G23090
AT4G28510
AT2G01830
AT2G02450
AT4G34750
AT4G37690
AT3G28420
AT5G05050
AT4G30975
AT1G54560
AT4G30420
AT3G45920
AT3G02910
AT2G27430
AT3G36659
AT1G20320
AT4G33040
AT1G66880
AT4G33020
AT1G51790
AT3G13010
AT2G32360
AT1G05260
AT1G64110
AT4G27415
AT3G61920
AT2G20350
AT5G23790
AT5G35660
AT3G44970
AT2G14210
AT3G02242
AT2G41860
AT3G54410
AT2G15600
AT3G23270
AT1G52400
AT5G16567
AT5G24790
AT5G41490
AT1G10770
AT4G32780
AT5G14740
AT2G16580
AT5G47550
AT3G50390
AT1G14880
AT5G26147
AT4G14368
AT1G03890
AT2G21220
AT4G35725
AT5G61630
AT3G23630
AT1G69792
AT5G43066
AT1G19630
AT2G02930
AT2G03550
AT4G10540
AT5G38420
AT3G22235
AT2G39850
AT1G65681
AT5G37910
AT4G21030
AT2G18720
AT1G74620
AT5G05420
AT3G23060
AT4G05130
AT5G11320
AT3G14880
AT2G16190
AT1G50310
AT3G45600
AT3G25573
AT1G49430
AT3G04570
AT5G59120
AT1G28660
AT2G01554
AT5G40560
AT3G28917
AT3G14820
AT2G44110
AT4G30410
AT4G27140
AT5G04347
AT3G03280
AT3G43829
AT1G47480
AT4G37580
AT1G22900
AT5G11050
AT3G01680
AT5G61700
AT3G49470
AT1G35180
AT1G35210
AT3G03341
AT1G63030
AT5G07160
AT5G35338
AT3G50120
AT4G16780
AT1G53350
AT1G69818
AT1G66440
AT2G19425
AT3G30724
AT5G42250
AT1G66320
AT5G16460
AT1G33890
AT2G20750
AT3G29720
AT2G33270
AT5G65590
AT1G70080
AT2G12462
AT1G47320
AT4G04370
AT4G34970
AT5G60470
AT4G33610
AT4G01360
AT2G24660
AT5G44020
AT2G28760
AT4G23882
AT4G18940
AT1G67590
AT1G69080
AT1G31400
AT3G08040
AT5G24540
AT1G73300
AT5G20260
AT1G30530
AT2G35270
AT5G52740
AT1G65750
AT5G14070
AT5G44870
AT2G02060
AT2G17610
AT2G30130
AT5G50115
AT4G29640
AT2G03300
AT3G52980
AT1G04500
AT1G56500
AT1G21130
AT5G48430
AT5G18130
AT2G39175
AT4G09030
AT5G61740
AT4G33220
AT4G24660
AT4G16590
AT3G48550
AT4G29580
AT5G50190
AT4G21600
AT1G26796
AT5G48710
AT5G09805
AT4G05360
AT3G47480
AT3G03780
AT1G68500
AT1G43886
AT2G16575
AT5G41250
AT3G44220
AT3G33084
AT3G28910
AT1G77760
AT3G24780
AT1G24062
AT5G35600
AT1G53820
AT5G56620
AT5G07040
AT1G51900
AT3G26782
AT4G22090
AT1G20350
AT1G22370
AT4G15320
AT1G32020
AT1G13245
AT1G53265
AT4G35640
AT4G08160
AT1G52695
AT1G04180
AT1G64400
AT4G17920
AT5G54062
AT2G19890
AT2G45400
AT1G14950
AT1G55660
AT1G10260
AT1G33750
AT1G61270
AT4G16748
AT2G19800
AT4G00120
AT1G52000
AT1G37130
AT1G31310
AT3G55677
AT4G28365
AT2G02580
AT5G55560
AT5G37860
AT3G14970
AT2G25820
AT4G02300
AT2G14206
AT5G10030
AT2G25330
AT2G03980
AT4G08770
AT4G03565
AT1G72140
AT2G21140
AT1G05291
AT2G01300
AT1G14420
AT4G15460
AT5G38120
AT2G36890
AT3G16650
AT3G16590
AT5G39200
AT5G37730
AT5G14345
AT5G63660
AT2G35960
AT2G32540
AT3G10845
AT1G78476
AT1G13300
AT2G46720
AT2G28970
AT4G11655
AT5G03210
AT1G47350
AT3G56390
AT3G19660
AT2G45830
AT5G46320
AT1G24010
AT4G28395
AT4G30280
AT1G21300
AT2G03250
AT1G32660
AT3G04990
AT5G38590
AT1G62420
AT3G46613
AT5G57620
AT4G03620
AT3G46840
AT3G29690
AT2G45110
AT1G09790
AT5G65100
AT1G60270
AT1G25400
AT5G17795
AT3G06370
AT5G49240
AT1G43140
AT2G01023
AT5G45970
AT2G23900
AT1G49770
AT3G28330
AT1G51300
AT1G56150
AT3G27500
AT2G02120
AT1G75520
AT1G53890
AT5G01370
AT4G11190
AT5G26920
AT4G37950
AT5G01734
AT5G57130
AT3G47400
AT4G19810
AT4G13345
AT5G47450
AT4G36250
AT3G61500
AT1G33080
AT5G66815
AT2G27930
AT1G64290
AT3G24240
AT1G56300
AT4G33560
AT3G51171
AT2G34204
AT3G50740
AT3G19600
AT2G20080
AT3G60100
AT1G62810
AT1G68280
AT3G58310
AT1G05580
AT1G50880
AT4G14465
AT5G39420
AT3G46086
AT1G44830
AT4G27950
AT4G15396
AT3G32030
AT4G23370
AT5G08240
AT3G01080
AT1G61630
AT1G28590
AT5G38450
AT1G24145
AT3G55580
AT1G68170
AT4G14810
AT5G17860
AT4G30880
AT2G44030
AT2G45650
AT5G40020
AT2G30940
AT3G06962
AT4G13240
AT5G28490
AT1G51240
AT3G59160
AT3G25655
AT5G40280
AT3G04010
AT1G23270
AT3G51190
AT5G65850
AT5G62320
AT5G23950
AT2G01340
AT5G55080
AT2G47040
AT2G30770
AT3G48231
AT2G28630
AT3G53770
AT2G03290
AT3G61150
AT4G25410
AT3G01331
AT3G12970
AT5G44330
AT5G05430
AT4G26280
AT3G17260
AT2G39320
AT1G70270
AT5G03552
AT1G34580
AT5G56200
AT2G26050
AT4G00180
AT4G09110
AT5G24530
AT3G45940
AT5G65165
AT1G15640
AT5G67060
AT3G16530
AT1G56040
AT5G65730
AT4G16540
AT4G24300
AT4G18390
AT5G48070
AT4G22510
AT3G11435
AT3G23850
AT3G21980
AT2G34140
AT1G68825
AT3G15370
AT3G50755
AT3G11430
AT1G49100
AT2G45450
AT5G07630
AT2G26695
AT2G23880
AT1G02580
AT4G15750
AT2G44560
AT4G10520
AT3G04290
AT2G16005
AT2G36190
AT4G33330
AT1G02650
AT3G11150
AT2G29790
AT3G03540
AT4G14250
AT3G09940
AT3G51860
AT1G65485
AT2G25940
AT5G17820
AT5G66400
AT5G46960
AT3G23010
AT3G45560
AT5G02100
AT5G01320
AT5G39690
AT5G37210
AT1G52140
AT1G60410
AT3G60120
AT3G53640
AT4G35733
AT2G45760
AT3G01240
AT1G49110
AT3G43860
AT5G24560
AT1G71050
AT1G77650
AT5G25340
AT5G36925
AT5G43840
AT5G54030
AT5G10180
AT5G58390
AT5G37320
AT5G33355
AT1G19620
AT2G31910
AT2G29040
AT5G07540
AT2G34610
AT1G66960
AT2G30750
AT4G11393
AT3G09520
AT2G37010
AT5G42180
AT5G43610
AT2G46640
AT3G22800
AT1G21326
AT2G27670
AT2G41945
AT1G68230
AT1G63370
AT4G18910
AT4G05510
AT2G21490
AT4G15310
AT5G41570
AT1G06800
AT5G26262
AT2G39530
AT1G52830
AT3G13830
AT1G68320
AT1G20800
AT2G24700
AT2G19420
AT4G39010
AT1G45015
AT4G09600
AT1G23160
AT2G29060
AT3G57540
AT1G65760
AT2G25160
AT1G08230
AT3G42180
AT5G19260
AT4G13290
AT3G27720
AT3G21510
AT3G13710
AT1G48810
AT3G53960
AT2G03500
AT2G47260
AT1G03170
AT3G01880
AT1G76830
AT1G04280
AT4G26950
AT5G57650
AT3G54700
AT1G55020
AT5G41500
AT4G16260
AT4G04490
AT3G20898
AT4G20550
AT3G55240
AT1G02790
AT4G21840
AT3G26934
AT1G47389
AT2G31110
AT4G27170
AT2G34925
AT4G33120
AT1G79420
AT2G24800
AT1G52070
AT3G17060
AT1G33280
AT5G65980
AT4G08450
AT5G57785
AT3G49200
AT1G59810
AT1G28306
AT2G31020
AT1G32650
AT5G41590
AT5G12236
AT4G16235
AT4G05170
AT5G42600
AT4G12890
AT3G02920
AT5G09970
AT1G78820
AT2G27570
AT1G03790
AT1G68750
AT1G22065
AT2G16535
AT2G43060
AT4G18920
AT5G56490
AT5G22460
AT5G07690
AT5G05120
AT2G18880
AT4G19700
AT1G02220
AT5G64790
AT4G33280
AT5G65800
AT4G13610
AT1G56680
AT5G07760
AT5G36870
AT5G57780
AT4G00390
AT2G37430
AT3G09400
AT2G43880
AT1G77200
AT5G23395
AT4G02270
AT5G57720
AT3G49190
AT1G20860
AT1G18200
AT3G44300
AT1G02965
AT3G26290
AT5G14011
AT1G28160
AT2G23400
AT2G47770
AT3G04420
AT5G66740
AT2G14095
AT5G60810
AT4G01180
AT5G55856
AT5G43860
AT2G28725
AT3G54450
AT5G19600
AT2G02340
AT4G01985
AT5G63600
AT5G50160
AT4G12500
AT4G00315
AT2G32890
AT2G23130
AT1G71770
AT4G30290
AT1G63245
AT5G54210
AT4G30460
AT2G15042
AT2G34880
AT4G35165
AT3G04070
AT2G21030
AT5G22430
AT4G12280
AT2G14220
AT5G25330
AT5G19530
AT5G05113
AT3G23220
AT1G07720
AT3G20580
AT2G02650
AT3G07870
AT1G26310
AT2G38530
AT5G17950
AT2G31082
AT4G10865
AT3G59600
AT1G59453
AT1G26950
AT3G60570
AT3G60790
AT2G31560
AT1G75930
AT1G77700
AT4G32580
AT1G54550
AT4G22517
AT3G61900
AT2G03830
AT3G16670
AT3G29050
AT5G16235
AT4G05180
AT3G19070
AT1G28650
AT1G18760
AT1G78470
AT2G01990
AT3G46050
AT5G38435
AT2G36750
AT2G37130
AT1G74810
AT1G52827
AT4G02870
AT4G23610
AT1G06280
AT5G01680
AT3G10080
AT1G08465
AT1G32970
AT5G07475
AT5G42590
AT4G29970
AT3G17550
AT2G39010
AT4G33465
AT4G22110
AT4G20810
AT5G49250
AT2G17310
AT5G55750
AT1G32910
AT5G27310
AT2G27935
AT1G58450
AT1G78460
AT4G12220
AT1G72490
AT1G21670
AT4G05430
AT2G40910
AT1G26815
AT1G65880
AT3G22340
AT5G18690
AT5G63087
AT2G27535
AT2G21890
AT3G08870
AT1G29590
AT3G01085
AT2G34870
AT1G33860
AT2G16740
AT1G09550
AT4G19800
AT3G43890
AT3G30530
AT1G80730
AT5G13600
AT4G13310
AT1G21330
AT2G37370
AT5G18990
AT5G02110
AT1G57980
AT2G32470
AT2G17960
AT2G15580
AT4G38030
AT4G10850
AT5G35110
AT5G12000
AT1G78840
AT3G46480
AT2G03750
AT5G37030
AT5G54820
AT3G52740
AT2G37610
AT2G42350
AT2G28710
AT1G44940
AT5G22390
AT1G52130
AT5G52900
AT5G39540
AT4G19820
AT2G24740
AT1G47810
AT1G33550
AT1G33055
AT4G23150
AT3G27480
AT3G29680
AT1G51920
AT4G17860
AT1G35290
AT3G13130
AT3G19030
AT1G23050
AT2G38325
AT1G48990
AT1G29080
AT1G08100
AT3G15534
AT5G03710
AT3G46650
AT3G45790
AT1G63295
AT5G35550
AT2G43150
AT1G63420
AT4G37420
AT5G53510
AT5G22380
AT5G38070
AT1G73000
AT5G04120
AT4G23520
AT3G63230
AT1G63880
AT2G46710
AT3G43270
AT1G79110
AT1G58420
AT1G49860
AT3G26815
AT3G25270
AT1G49005
AT2G01280
AT3G23190
AT1G18970
AT2G14670
AT5G62848
AT3G23130
AT3G10340
AT5G52830
AT1G72430
AT2G44195
AT2G22810
AT1G11210
AT5G49630
AT1G66630
AT3G05727
AT3G09530
AT4G23990
AT1G31640
AT2G46360
AT4G20590
AT5G36660
AT4G20230
AT5G22250
AT1G78760
AT1G44542
AT5G17430
AT5G10000
AT5G46610
AT1G28430
AT2G19500
AT1G12190
AT5G18860
AT3G06020
AT2G47880
AT2G07560
AT2G28140
AT5G03204
AT3G17150
AT3G58290
AT1G13370
AT2G36030
AT3G62180
AT1G51490
AT2G18320
AT3G14480
AT1G58037
AT1G69870
AT2G02080
AT1G24260
AT5G63350
AT1G68960
AT2G31432
AT2G42425
AT5G06790
AT5G53610
AT3G13760
AT1G22360
AT3G62690
AT1G75040
AT1G07985
AT3G04200
AT5G66390
AT4G12050
AT3G11680
AT2G15400
AT2G04480
AT1G18520
AT1G11230
AT1G67640
AT4G35150
AT4G09930
AT5G52680
AT3G48720
AT1G22210
AT1G44080
AT5G07930
AT4G18770
AT1G18050
AT1G14755
AT5G27807
AT2G18970
AT1G29140
AT4G03170
AT1G55110
AT3G22060
AT1G55420
AT1G73590
AT4G11050
AT3G60900
AT1G57730
AT1G21470
AT1G61105
AT2G34800
AT3G17320
AT2G04038
AT1G53880
AT1G65610
AT4G18870
AT4G35660
AT4G16990
AT3G61280
AT1G43020
AT4G12930
AT1G23660
AT1G35630
AT4G32378
AT3G15536
AT3G10460
AT4G28100
AT5G37220
AT1G56240
AT4G09540
AT5G52150
AT1G67000
AT2G37740
AT3G18670
AT5G54365
AT2G18590
AT1G26945
AT2G23010
AT1G67870
AT5G06270
AT2G28850
AT1G06350
AT5G09750
AT1G66220
AT2G17060
AT3G45577
AT4G22400
AT4G02733
AT3G26855
AT1G26390
AT2G19000
AT1G28695
AT1G75160
AT2G30230
AT1G51820
AT5G19040
AT4G15360
AT1G52460
AT1G68390
AT5G25250
AT2G21840
AT5G15040
AT1G78370
AT4G17695
AT3G44630
AT5G59720
AT5G55330
AT4G22050
AT3G49280
AT3G57260
AT3G21770
AT3G18957
AT5G40420
AT4G20530
AT1G80050
AT1G54750
AT3G09285
AT1G28130
AT3G43960
AT1G50090
AT5G11590
AT1G62280
AT5G28690
AT3G04765
AT5G39471
AT5G66300
AT3G45110
AT1G73870
AT5G23380
AT2G26870
AT2G31945
AT4G32540
AT3G06778
AT5G62060
AT1G35490
AT1G51220
AT1G49260
AT3G50480
AT1G12010
AT4G24010
AT3G50570
AT3G26830
AT2G36970
AT1G19640
AT2G22930
AT3G52790
AT3G56890
AT5G50950
AT1G22380
AT3G53830
AT4G33860
AT2G28315
AT1G15840
AT4G24000
AT1G18290
AT5G46600
AT2G41870
AT2G02250
AT5G53780
AT2G24950
AT2G03180
AT1G68520
AT3G45755
AT1G66390
AT5G19100
AT1G19890
AT2G37180
AT3G27990
AT1G54575
AT2G15029
AT1G65310
AT5G07030
AT5G12280
AT5G16740
AT5G54700
AT2G34320
AT3G20450
AT3G53060
AT4G36700
AT1G63870
AT4G31470
AT2G18500
AT5G23212
AT4G12960
AT5G50120
AT2G24735
AT1G73965
AT1G80820
AT1G58160
AT1G48530
AT5G10220
AT2G43580
AT5G39900
AT5G50040
AT5G44270
AT5G26800
AT3G22700
AT2G33160
AT4G18900
AT3G53305
AT5G58890
AT2G24710
AT2G37090
AT2G16890
AT1G30190
AT2G26865
AT1G14550
AT1G46120
AT3G19310
AT1G62450
AT3G04170
AT1G79130
AT5G28515
AT4G08360
AT3G21050
AT1G58340
AT3G53980
AT1G44090
AT1G70840
AT2G35612
AT3G47750
AT3G13435
AT1G10880
AT5G08695
AT5G07260
AT5G08391
AT2G44581
AT2G28590
AT3G12850
AT5G42280
AT2G26690
AT1G63580
AT4G16160
AT1G07610
AT5G12270
AT4G22650
AT2G34340
AT5G65158
AT3G51895
AT3G12977
AT5G46830
AT1G77110
AT1G16705
AT5G02260
AT4G09740
AT3G10510
AT5G38440
AT1G69480
AT5G50260
AT2G02290
AT1G71520
AT3G26820
AT3G19550
AT3G50460
AT3G60720
AT2G25680
AT1G07850
AT1G35190
AT3G21840
AT4G06658
AT3G27840
AT3G57270
AT1G03620
AT1G26790
AT5G41720
AT2G23840
AT1G74110
AT5G49130
AT1G47360
AT1G65770
AT4G29450
AT1G13600
AT5G44120
AT1G18390
AT1G26797
AT5G62510
AT2G39518
AT1G28190
AT3G17230
AT4G01490
AT5G48060
AT4G18720
AT5G60610
AT5G44345
AT3G04190
AT5G05300
AT1G08090
AT5G20790
AT4G25990
AT1G66460
AT1G72580
AT3G24535
AT1G74080
AT5G53100
AT1G12960
AT1G65360
AT4G05100
AT4G01190
AT4G12330
AT1G71030
AT5G16170
AT5G23220
AT3G47250
AT3G27510
AT4G03610
AT1G21910
AT1G33090
AT3G60700
AT3G07850
AT4G04745
AT4G30140
AT1G66190
AT4G32880
AT3G25165
AT1G12940
AT4G22170
AT1G03990
AT4G22530
AT3G11420
AT4G19925
AT3G23960
AT5G54745
AT5G54400
AT3G21880
AT1G44318
AT1G70880
AT4G01520
AT5G38344
AT4G19250
AT1G12180
AT1G71002
AT1G18780
AT3G49980
AT5G19560
AT3G16800
AT2G34700
AT5G25430
AT1G15330
AT1G19930
AT4G23360
AT3G52535
AT2G31470
AT2G28056
AT3G45570
AT4G18990
AT2G29490
AT2G42530
AT4G00885
AT1G11770
AT1G10220
AT5G55855
AT3G62070
AT5G05250
AT3G60270
AT2G48130
AT2G23230
AT1G22120
AT1G52050
AT5G24910
AT5G08150
AT5G54370
AT5G03010
AT3G49780
AT5G15110
AT3G14950
AT2G19360
AT3G23250
AT3G20610
AT5G50130
AT2G20870
AT5G67430
AT2G42410
AT2G13810
AT1G70560
AT1G32170
AT1G25530
AT4G27160
AT4G25810
AT5G53870
AT2G33190
AT1G29160
AT1G62490
AT5G20100
AT2G05400
AT4G33420
AT5G63225
AT5G56300
AT2G42840
AT2G34540
AT1G24625
AT5G37660
AT2G45190
AT1G13200
AT4G35820
AT5G45880
AT4G27420
AT1G02620
AT3G04320
AT3G14810
AT2G46880
AT1G64000
AT4G38530
AT1G33930
AT2G28180
AT2G47550
AT2G46375
AT4G20235
AT5G07560
AT4G33900
AT1G35250
AT3G20880
AT2G18490
AT4G28397
AT1G52700
AT1G60986
AT4G34210
AT2G37540
AT3G10720
AT5G46270
AT4G04080
AT3G29430
AT3G27416
AT3G26930
AT3G16680
AT5G25320
AT2G30430
AT3G21210
AT2G36560
AT1G62410
AT1G76210
AT3G28915
AT1G12064
AT2G30290
AT5G27380
AT2G43745
AT2G43530
AT3G28070
AT2G34360
AT5G17980
AT1G17710
AT5G67450
AT1G14240
AT1G11250
AT3G14362
AT4G01780
AT2G31425
AT5G43110
AT2G03010
AT5G42860
AT1G35910
AT4G05475
AT5G60010
AT1G76800
AT3G09270
AT3G45780
AT2G15010
AT1G09240
AT4G15390
AT1G67810
AT1G70850
AT2G44925
AT3G53232
AT1G56360
AT4G22490
AT3G23560
AT5G01120
AT3G19710
AT1G18835
AT5G46050
AT1G57570
AT4G21850
AT3G27400
AT1G06020
AT2G39590
AT4G15740
AT1G11915
AT3G22730
AT1G53023
AT5G61890
AT1G33440
AT1G75590
AT4G29930
AT1G72290
AT5G06730
AT1G63835
AT5G19880
AT5G37920
AT2G25990
AT3G62380
AT4G19260
AT4G15690
AT4G37770
AT3G49051
AT5G19730
AT3G19002
AT2G43570
AT3G47090
AT5G22990
AT3G26812
AT4G01830
AT5G47220
AT1G56120
AT5G02920
AT4G24980
AT3G60090
AT2G18150
AT1G64060
AT5G46520
AT5G59090
AT3G62230
AT1G41830
AT2G26580
AT4G31900
AT1G08440
AT1G34490
AT3G63095
AT3G45760
AT3G01326
AT2G23220
AT4G24130
AT1G17430
AT1G43800
AT5G16030
AT5G18600
AT1G44608
AT5G43340
AT2G36710
AT1G12600
AT2G41100
AT3G28380
AT2G31750
AT1G08150
AT3G20160
AT5G01075
AT2G23171
AT5G03600
AT4G25590
AT4G21895
AT5G64770
AT1G77080
AT3G13229
AT5G04330
AT1G53160
AT1G69890
AT1G15610
AT5G51310
AT5G02370
AT5G12910
AT4G15093
AT5G08090
AT3G20210
AT5G26260
AT1G48720
AT4G12470
AT2G18010
AT1G09932
AT3G22050
AT4G08620
AT4G26483
AT1G15460
AT4G30970
AT2G15260
AT1G11920
AT5G07550
AT2G40610
AT4G16770
AT4G08750
AT1G48000
AT2G35770
AT3G50510
AT3G19160
AT1G20135
AT1G62700
AT3G49020
AT2G05720
AT3G56060
AT1G72220
AT1G23210
AT1G49320
AT1G66400
AT1G58280
AT5G06080
AT2G01780
AT2G25735
AT1G60320
AT4G13490
AT2G25409
AT1G65300
AT4G26250
AT2G29320
AT2G35080
AT4G15735
AT1G14780
AT1G31000
AT3G27785
AT1G47405
AT3G19000
AT4G30230
AT1G05310
AT5G59930
AT3G14780
AT1G28330
AT4G30120
AT5G48420
AT5G21280
AT4G30980
AT3G21890
AT2G31180
AT5G41450
AT3G46340
AT1G13620
AT3G59180
AT5G17740
AT5G39470
AT1G43010
AT2G01008
AT2G39060
AT4G21690
AT3G48208
AT4G14370
AT5G07430
AT3G01530
AT1G01630
AT2G32150
AT4G11521
AT2G16990
AT1G05577
AT1G30930
AT1G18790
AT1G66270
AT5G62340
AT3G52450
AT1G11990
AT3G59230
AT4G12920
AT1G14120
AT3G59010
AT3G57460
AT4G00752
AT1G26870
AT3G29060
AT1G20080
AT5G15175
AT1G13610
AT1G18350
AT1G08500
AT5G56560
AT2G22155
AT5G46877
AT2G40670
AT3G25420
AT3G12710
AT1G21430
AT5G40050
AT2G36440
AT1G48060
AT2G01021
AT1G58270
AT5G22910
AT4G28720
AT4G12510
AT2G23260
AT2G42040
AT4G28800
AT5G24410
AT5G05910
AT3G60000
AT2G42670
AT2G18480
AT4G24644
AT3G47710
AT1G70940
AT1G06810
AT1G68568
AT5G37381
AT5G50200
AT3G44096
AT5G24580
AT5G46690
AT3G55540
AT2G41690
AT2G17090
AT5G52340
AT1G65090
AT3G50190
AT2G27070
AT1G34560
AT1G33110
AT4G22980
AT3G55110
AT1G29280
AT5G52140
AT3G11300
AT4G04090
AT2G36695
AT4G11930
AT2G41280
AT3G59930
AT3G17200
AT2G08986
AT3G46160
AT1G52290
AT3G24216
AT4G16050
AT5G20860
AT3G08810
AT5G38800
AT2G38304
AT2G02240
AT3G47360
AT4G39060
AT2G32690
AT2G21000
AT5G55507
AT1G21930
AT3G52330
AT1G32713
AT1G78860
AT5G25180
AT5G63450
AT1G62340
AT3G55512
AT5G48940
AT3G45250
AT3G12220
AT1G21010
AT1G61688
AT3G13960
AT1G55440
AT2G22990
AT3G56230
AT2G17290
AT1G62220
AT3G13280
AT5G20370
AT1G24147
AT3G26270
AT2G32788
AT3G20940
AT1G35890
AT3G53300
AT1G23910
AT4G38000
AT5G62330
AT3G48960
AT1G48510
AT5G41290
AT1G24520
AT1G66370
AT1G09026
AT2G10450
AT1G58225
AT2G28460
AT4G36100
AT1G47603
AT5G52720
AT5G54150
AT5G58465
AT1G34245
AT1G57565
AT3G51600
AT5G41300
AT1G47860
AT4G20800
AT2G24850
AT1G35255
AT1G24020
AT3G29034
AT2G16230
AT4G18425
AT1G13400
AT1G52190
AT2G24510
AT3G28990
AT1G30040
AT5G24825
AT4G16640
AT4G21362
AT5G48130
AT1G72210
AT4G29370
AT1G02070
AT5G05965
AT5G43180
AT4G37840
AT3G01940
AT5G02580
AT2G19450
AT5G17120
AT3G13630
AT5G38980
AT5G01190
AT4G07820
AT2G36210
AT4G25950
AT4G14540
AT1G59940
AT1G32585
AT1G57943
AT2G29740
AT3G06390
AT5G39280
AT3G19390
AT3G42880
AT4G36280
AT4G12980
AT1G21550
AT3G11110
AT2G27389
AT5G37500
AT5G02510
AT2G16380
AT1G15550
AT5G67390
AT1G02340
AT5G59370
AT2G01520
AT2G36120
AT3G51030
AT3G25790
AT1G71970
AT2G41910
AT4G22800
AT3G44790
AT2G18670
AT4G34600
AT5G55930
AT5G43935
AT5G15725
AT4G29610
AT3G05300
AT4G22080
AT1G26320
AT3G10990
AT2G45360
AT4G01500
AT2G01660
AT1G67025
AT2G14760
AT1G64160
AT1G51780
AT5G03680
AT5G06839
AT1G63200
AT2G31430
AT3G26610
AT2G34010
AT4G28670
AT2G22760
AT2G04050
AT4G02871
AT2G43871
AT1G66160
AT1G73120
AT3G47510
AT4G16000
AT5G46540
AT1G48820
AT3G58190
AT3G27809
AT1G18075
AT3G10600
AT2G26720
AT5G65380
AT1G02810
AT5G58500
AT2G31700
AT1G17950
AT1G21990
AT5G54360
AT1G29110
AT2G29370
AT4G11810
AT4G20200
AT3G10116
AT3G10280
AT3G21240
AT1G73580
AT1G22651
AT5G38580
AT3G46410
AT2G44070
AT1G53815
AT1G53640
AT2G32200
AT5G38130
AT1G69120
AT1G23760
AT2G26420
AT1G26350
AT3G55900
AT1G64910
AT2G33670
AT2G04170
AT1G32510
AT5G17090
AT2G14080
AT1G62035
AT5G42430
AT2G40370
AT5G37950
AT5G42510
AT1G28304
AT5G26080
AT1G78090
AT2G32270
AT2G26160
AT4G35400
AT2G35585
AT5G54585
AT3G54990
AT3G17152
AT5G17720
AT5G39090
AT1G11460
AT5G44470
AT5G02700
AT3G11405
AT5G35917
AT5G44190
AT1G28700
AT1G09157
[truncated: 6,283 more rows]

## Sheet: I K27
AT4G32100
AT2G40435
AT1G30814
AT4G34580
AT4G03450
AT1G71695
AT4G25920
AT1G12980
AT1G08135
AT1G29010
AT1G23201
AT1G09030
AT5G19720
AT3G43250
AT3G21990
AT5G18450
AT2G25630
AT3G54820
AT5G46310
AT2G29730
AT5G45530
AT2G17600
AT3G25717
AT3G22840
AT1G77340
AT5G35715
AT4G31250
AT2G23210
AT5G56110
AT5G07505
AT2G21930
AT3G15170
AT4G25090
AT1G21310
AT3G18470
AT2G18870
AT5G50770
AT1G56250
AT5G04950
AT4G25980
AT1G28305
AT5G25550
AT4G02740
AT1G02190
AT1G14100
AT3G18720
AT5G23000
AT4G20650
AT2G43600
AT2G02680
AT1G66852
AT1G22340
AT3G13790
AT4G30770
AT1G69810
AT5G63170
AT1G75600
AT5G52260
AT5G67000
AT5G36970
AT3G03272
AT4G32280
AT4G27250
AT4G03298
AT3G12880
AT2G22960
AT5G38950
AT1G65630
AT2G21188
AT1G71390
AT1G47790
AT5G46260
AT4G19910
AT5G04000
AT4G11211
AT2G39710
AT1G65484
AT4G19720
AT2G38230
AT3G03350
AT3G04060
AT3G50870
AT3G14500
AT4G19380
AT1G60073
AT3G49150
AT3G09680
AT4G10596
AT1G51810
AT3G59590
AT1G25988
AT4G22235
AT4G23710
AT2G16970
AT1G27730
AT2G04100
AT5G16350
AT3G01311
AT3G13820
AT2G15080
AT3G25905
AT3G23430
AT3G48230
AT3G44400
AT4G14690
AT3G49770
AT3G13437
AT2G40802
AT5G42580
AT5G38770
AT4G22180
AT2G33130
AT5G22720
AT3G49700
AT1G57800
AT4G23200
AT5G19580
AT5G52690
AT1G26380
AT1G08080
AT4G10680
AT5G50060
AT3G15251
AT2G32350
AT1G75550
AT1G71890
AT1G23120
AT3G13650
AT2G31920
AT2G05520
AT1G80090
AT4G26560
AT1G80580
AT1G44800
AT4G23670
AT1G68810
AT4G28520
AT2G31780
AT3G28780
AT1G23720
AT4G20560
AT3G28790
AT4G03566
AT2G04220
AT4G02317
AT3G45170
AT3G28020
AT2G27700
AT2G40210
AT5G57625
AT5G51210
AT5G27870
AT5G16285
AT3G22000
AT5G06300
AT5G24950
AT4G13820
AT5G03860
AT3G06890
AT5G26070
AT1G05250
AT3G44560
AT1G67260
AT5G53620
AT4G31950
AT2G41380
AT1G10010
AT1G02310
AT3G61290
AT3G48310
AT5G59390
AT5G55880
AT3G49765
AT1G68270
AT5G54610
AT3G27970
AT5G26250
AT3G09990
AT5G20560
AT5G12990
AT4G26530
AT2G02300
AT5G42410
AT5G66816
AT1G74000
AT1G70510
AT4G28811
AT3G47180
AT3G21360
AT5G44585
AT5G57670
AT5G63230
AT3G05960
AT1G55580
AT4G36170
AT5G62750
AT5G24960
AT2G45434
AT3G11310
AT2G43620
AT1G53340
AT2G16130
AT3G17140
AT5G50500
AT3G57250
AT3G57510
AT2G47560
AT1G79470
AT1G56540
AT1G24148
AT5G11630
AT4G11880
AT2G37390
AT1G26795
AT4G16024
AT1G77150
AT1G77520
AT2G03840
AT4G27400
AT4G25760
AT5G53910
AT2G05435
AT1G10747
AT5G09500
AT1G69860
AT1G33560
AT5G56970
AT1G01250
AT4G19680
AT2G38390
AT1G43650
AT5G09320
AT5G03810
AT1G51230
AT3G26470
AT1G09960
AT5G55410
AT3G20760
AT5G23960
AT4G33600
AT4G12320
AT1G51990
AT5G23030
AT1G75390
AT5G11830
AT3G29580
AT1G62510
AT4G25930
AT2G38380
AT2G33520
AT1G53625
AT5G35900
AT2G42110
AT2G31230
AT1G63360
AT3G05730
AT5G28210
AT2G38940
AT1G21327
AT1G73830
AT4G34800
AT4G28340
AT3G07350
AT3G58350
AT2G17305
AT2G17160
AT5G25300
AT3G14510
AT5G45540
AT1G78710
AT1G33730
AT1G12672
AT5G40360
AT1G71280
AT3G18715
AT2G24260
AT2G18350
AT3G57620
AT3G07970
AT2G21910
AT4G28130
AT5G08070
AT3G08700
AT5G41510
AT2G40160
AT2G30933
AT5G06610
AT1G08160
AT2G22470
AT1G58643
AT5G22870
AT1G56410
AT2G01940
AT1G06330
AT2G02310
AT5G46130
AT4G11020
AT3G16430
AT1G51440
AT4G01140
AT2G42990
AT1G62978
AT5G05340
AT4G29280
AT3G03290
AT2G22145
AT3G22770
AT2G41810
AT4G05110
AT3G24230
AT3G44080
AT5G56920
AT1G47317
AT5G38000
AT2G19310
AT1G19230
AT1G80840
AT5G03570
AT3G28320
AT2G35830
AT3G57850
AT2G23160
AT5G55020
AT1G28080
AT2G28420
AT5G44630
AT1G60450
AT5G05810
AT2G40900
AT5G02340
AT1G56270
AT5G38240
AT4G15280
AT4G01925
AT5G51490
AT5G18270
AT5G24100
AT1G71300
AT2G32210
AT3G18150
AT4G34790
AT3G51400
AT5G24150
AT4G23590
AT3G52510
AT4G15417
AT4G13560
AT3G19920
AT3G44910
AT2G02660
AT1G49570
AT5G62830
AT2G45130
AT2G39415
AT1G68470
AT1G13609
AT5G58400
AT5G50800
AT2G27750
AT3G25815
AT1G48800
AT1G47980
AT5G40680
AT5G41390
AT4G35020
AT5G40000
AT2G43610
AT2G38910
AT2G17170
AT1G63750
AT5G23190
AT1G51805
AT1G23250
AT4G13580
AT1G26400
AT5G19650
AT4G13090
AT3G15910
AT1G58602
AT5G44005
AT5G07990
AT4G16230
AT1G11520
AT5G60720
AT5G46890
AT3G54940
AT2G12480
AT1G50990
AT2G25130
AT2G19806
AT4G24070
AT3G55100
AT3G48275
AT5G22970
AT2G36325
AT1G22150
AT1G51320
AT5G24240
AT5G45730
AT3G50200
AT2G44240
AT1G26700
AT1G07500
AT1G70260
AT5G17750
AT2G40750
AT1G61563
AT1G23145
AT4G25330
AT3G09920
AT2G40330
AT2G17470
AT1G55700
AT5G61660
AT2G19990
AT2G02540
AT1G10250
AT3G12910
AT3G24250
AT1G55650
AT1G51850
AT3G25730
AT2G03720
AT2G28960
AT3G47210
AT2G47810
AT4G39750
AT3G63360
AT3G05450
AT1G55928
AT3G18010
AT5G59040
AT4G18550
AT4G35030
AT2G03170
AT1G68840
AT5G22980
AT4G13450
AT3G01250
AT5G49520
AT3G46070
AT5G37180
AT1G18810
AT2G38905
AT3G01840
AT1G09930
AT2G42440
AT5G24820
AT1G10585
AT2G31360
AT2G40520
AT3G23090
AT4G28510
AT2G02450
AT1G07485
AT3G28420
AT5G05050
AT4G30975
AT1G54560
AT4G30420
AT3G45920
AT1G12030
AT2G15590
AT3G46190
AT3G02910
AT2G27430
AT2G18080
AT1G09483
AT3G36659
AT1G20320
AT4G33040
AT1G47813
AT1G66880
AT2G05970
AT4G33020
AT5G53240
AT3G57140
AT3G13010
AT1G70910
AT2G32360
AT5G39720
AT1G05260
AT1G64110
AT3G24670
AT3G61920
AT3G02150
AT2G22050
AT1G33102
AT4G11170
AT2G20350
AT5G23790
AT1G12663
AT2G28810
AT4G22700
AT5G35660
AT1G01580
AT5G07410
AT3G44970
AT2G14210
AT5G14730
AT3G49580
AT2G22060
AT5G59800
AT3G02242
AT4G17980
AT2G41860
AT5G60070
AT3G54410
AT2G27780
AT2G05510
AT2G15600
AT2G26380
AT1G52400
AT1G66050
AT5G24790
AT5G41490
AT1G10770
AT5G07000
AT4G32780
AT5G14740
AT1G28375
AT2G16580
AT2G37810
AT3G50390
AT1G14880
AT5G26147
AT4G14368
AT1G11190
AT1G03890
AT5G23370
AT2G21220
AT5G54148
AT4G35725
AT3G49440
AT3G44700
AT1G47786
AT3G20470
AT1G59780
AT5G61630
AT3G23630
AT5G59310
AT3G19520
AT3G25750
AT3G11402
AT1G58090
AT5G43066
AT5G51320
AT1G19630
AT1G20380
AT3G28570
AT2G02930
AT4G39000
AT2G03550
AT3G47170
AT1G17800
AT5G07700
AT4G10540
AT5G38420
AT3G22235
AT5G23010
AT2G39850
AT4G01535
AT1G65681
AT5G37910
AT4G21030
AT2G18720
AT1G01410
AT1G74620
AT5G05420
AT1G51910
AT3G23060
AT1G80220
AT4G05130
AT5G33340
AT4G03175
AT1G65490
AT1G06980
AT5G11320
AT5G15680
AT3G02810
AT5G16100
AT3G14880
AT5G66340
AT2G16190
AT1G50310
AT3G45600
AT5G40790
AT5G61605
AT3G25573
AT1G20900
AT5G38960
AT5G06740
AT1G49430
AT3G12203
AT3G04570
AT5G59120
AT5G25810
AT1G28660
AT1G14040
AT2G34530
AT2G01554
AT1G01030
AT2G19050
AT5G40560
AT3G28917
AT3G14820
AT5G39610
AT2G30840
AT2G44110
AT3G57670
AT4G30410
AT4G27140
AT5G04347
AT4G31875
AT3G03280
AT3G43829
AT1G47480
AT1G42980
AT5G10420
AT3G16240
AT2G37100
AT4G37580
AT1G22900
AT5G11050
AT1G75710
AT3G01680
AT1G62620
AT5G61700
AT3G61400
AT4G13960
AT3G62440
AT1G30835
AT3G26790
AT2G15610
AT3G49470
AT5G42146
AT1G68800
AT1G35180
AT1G35210
AT1G63030
AT5G42591
AT5G38020
AT5G07160
AT5G35338
AT4G30720
AT5G17450
AT3G50120
AT3G49820
AT1G53350
AT1G66440
AT2G19425
AT3G48700
AT2G43960
AT3G30724
AT5G42250
AT5G51790
AT1G66320
AT1G66090
AT5G13380
AT4G00080
AT5G16460
AT3G12470
AT1G72860
AT1G73510
AT4G09890
AT1G33890
AT5G10340
AT5G41550
AT5G64690
AT5G04500
AT5G02035
AT4G21780
AT3G26120
AT2G33270
AT2G43820
AT5G65590
AT1G70080
AT1G56430
AT1G47320
AT2G39800
AT4G15120
AT4G34970
AT5G60470
AT5G10430
AT2G43510
AT4G33610
AT4G01360
AT5G48210
AT3G01270
AT2G03030
AT1G49470
AT2G24660
AT5G10660
AT1G19464
AT5G44020
AT3G46700
AT3G44830
AT2G28760
AT4G23882
AT4G36600
AT4G18940
AT3G59845
AT5G41430
AT1G69080
AT3G16930
AT1G31400
AT1G60280
AT3G08040
AT2G05330
AT5G24540
AT1G60370
AT5G38710
AT3G21960
AT1G30530
AT5G12940
AT2G25260
AT2G35270
AT5G04340
AT5G15060
AT2G02140
AT4G13660
AT3G61910
AT4G39720
AT3G29670
AT1G65750
AT5G14070
AT5G44870
AT2G17050
AT2G02060
AT1G06137
AT3G26110
AT2G21010
AT1G53163
AT2G15025
AT2G30130
AT1G55030
AT3G22040
AT5G56700
AT3G51200
AT5G50115
AT4G29640
AT2G24980
AT1G18410
AT2G03300
AT1G01200
AT5G38530
AT3G52980
AT5G48110
AT5G43770
AT1G04500
AT2G02700
AT1G21130
AT5G52400
AT5G39650
AT3G50770
AT5G48430
AT3G16920
AT3G49330
AT2G39175
AT4G00540
AT4G09030
AT4G23310
AT4G09100
AT1G62440
AT2G23640
AT4G05230
AT4G30270
AT1G44740
AT5G24155
AT5G37478
AT3G28300
AT4G33220
AT1G80325
AT1G30730
AT4G24660
AT4G16590
AT5G43520
AT4G01540
AT3G48550
AT4G29580
AT5G50190
AT4G21600
AT2G46493
AT2G33650
AT1G26796
AT5G48710
AT5G39260
AT3G02500
AT5G50880
AT5G17073
AT4G16095
AT5G09805
AT3G23970
AT4G13510
AT3G47480
AT1G68500
AT1G43886
AT4G36160
AT2G16575
AT5G41250
AT4G11590
AT3G44220
AT3G01020
AT5G62420
AT3G28910
AT3G21040
AT5G04380
AT1G77760
AT3G24780
AT5G10504
AT5G35600
AT1G14870
AT1G53820
AT5G56620
AT5G07040
AT4G21380
AT1G51900
AT3G26782
AT4G22090
AT2G25450
AT1G29860
AT5G44380
AT1G20350
AT3G24270
AT5G20820
AT3G31051
AT1G22370
AT4G15320
AT1G32020
AT3G49130
AT3G45960
AT5G56325
AT1G78980
AT1G63210
AT4G35640
AT4G08160
AT1G52695
AT1G04180
AT2G18050
AT1G03800
AT5G60615
AT4G01430
AT4G37940
AT4G17920
AT5G54062
AT2G19890
AT3G23950
AT2G45400
AT1G47370
AT2G32280
AT1G14950
AT1G79430
AT1G55660
AT3G14680
AT1G10260
AT2G22170
AT4G21000
AT1G33750
AT1G61270
AT5G53190
AT4G16748
AT1G78390
AT4G00120
AT3G26150
AT1G01470
AT5G46010
AT3G55870
AT5G46875
AT1G52000
AT4G25250
AT1G37130
AT1G31310
AT1G27040
AT1G15630
AT3G55677
AT5G52620
AT4G24060
AT1G01183
AT1G04670
AT5G48510
AT4G28365
AT2G04495
AT2G02580
AT4G20610
AT4G11340
AT3G14970
AT2G25820
AT4G02300
AT2G14206
AT5G10030
AT3G52970
AT2G25330
AT4G34419
AT4G02280
AT1G24480
AT4G08770
AT4G03565
AT3G49950
AT1G78960
AT1G72140
AT2G21140
AT1G05291
AT2G01300
AT2G47130
AT1G14420
AT5G25400
AT5G09940
AT1G51000
AT5G38120
AT2G36890
AT3G16650
AT3G16590
AT1G18310
AT5G49690
AT3G55590
AT5G37690
AT3G19430
AT2G40990
AT3G20690
AT5G46380
AT5G37730
AT5G14345
AT5G23470
AT5G06230
AT3G04360
AT2G32540
AT3G10845
AT1G78476
AT3G57950
AT1G13300
AT3G58420
AT2G46720
AT2G35670
AT2G28970
AT4G11655
AT5G16023
AT1G47350
AT5G51610
AT3G19660
AT2G45830
AT3G49360
AT3G15840
AT1G24010
AT1G14960
AT4G28395
AT3G25670
AT4G30280
AT2G21610
AT1G21300
AT4G35610
AT4G18050
AT2G03250
AT1G34500
AT1G32660
AT3G28270
AT1G24530
AT1G59730
AT3G04990
AT1G59077
AT4G22640
AT1G62420
AT3G46613
AT5G57620
AT4G03620
AT3G46840
AT1G06080
AT2G45110
AT1G09790
AT4G25260
AT1G32583
AT1G02405
AT4G19790
AT5G65100
AT1G61590
AT1G60270
AT5G43300
AT1G25400
AT5G17795
AT3G06370
AT5G49240
AT2G03020
AT1G11810
AT4G02670
AT3G27410
AT1G43140
AT4G14390
AT3G30842
AT5G45970
AT2G23900
AT1G49770
AT3G28330
AT2G44745
AT1G51300
AT4G19930
AT1G56150
AT2G22800
AT5G45870
AT4G22160
AT3G27500
AT2G02120
AT1G75520
AT1G53890
AT1G53130
AT5G03260
AT5G01370
AT4G11190
AT1G47885
AT5G26920
AT3G60010
AT4G37950
AT2G34110
AT5G57130
AT5G56370
AT3G47620
AT1G16290
AT3G47400
AT4G19810
AT3G58390
AT2G42380
AT5G47450
AT4G36250
AT3G58440
AT3G01185
AT1G23730
AT4G11745
AT1G49450
AT1G20360
AT3G61500
AT2G39030
AT1G33080
AT1G04330
AT5G11130
AT3G25190
AT5G66815
AT2G27930
AT1G64290
AT3G17720
AT3G24240
AT1G02205
AT3G29830
AT2G34790
AT3G45285
AT1G63440
AT4G33560
AT1G13290
AT5G55770
AT3G51171
AT2G34204
AT3G54070
AT5G56420
AT3G50740
AT3G19600
AT4G13572
AT2G41970
AT2G20080
AT3G60100
AT1G62810
AT1G68280
AT3G58310
AT1G05580
AT1G50880
AT5G53210
AT4G14465
AT5G39420
AT4G12950
AT3G46086
AT2G07042
AT1G44830
AT5G01240
AT4G15396
AT2G28610
AT3G32030
AT4G39130
AT2G14500
AT5G36100
AT4G23370
AT1G51500
AT2G31081
AT3G01080
AT1G68180
AT2G13680
AT5G39440
AT1G61630
AT4G06746
AT1G48910
AT1G28590
AT5G38450
AT2G45750
AT1G70860
AT3G51700
AT1G24145
AT3G55580
AT3G21371
AT1G75790
AT1G68170
AT5G11660
AT4G14810
AT4G30880
AT2G44010
AT2G44030
AT1G64930
AT3G52520
AT2G45650
AT5G14010
AT5G40020
AT2G23170
AT2G30940
AT1G30950
AT3G58865
AT1G07860
AT3G06962
AT4G13240
AT3G23110
AT2G14580
AT5G28490
AT1G51240
AT3G59160
AT5G44490
AT3G25655
AT4G26820
AT4G08590
AT5G40280
AT4G22810
AT5G26190
AT5G05790
AT5G37420
AT5G62065
AT3G04010
AT1G23270
AT3G51190
AT5G65850
AT2G04500
AT1G62270
AT1G02940
AT1G68130
AT5G62320
AT1G72130
AT3G12430
AT1G60350
AT3G43828
AT5G23950
AT2G01340
AT1G43160
AT3G20600
AT5G55720
AT5G55080
AT2G47040
AT2G30770
AT2G28630
AT3G53770
AT2G03290
AT3G61150
AT1G18570
AT5G53990
AT4G25410
AT3G01331
AT3G12970
AT5G44330
AT5G05430
AT2G43270
AT1G28323
AT4G26280
AT3G17260
AT5G40348
AT3G26550
AT2G39320
AT1G70270
AT1G47450
AT5G03552
AT4G16563
AT3G28220
AT1G01670
AT4G12190
AT1G34580
AT5G50870
AT1G80100
AT5G56200
AT2G26050
AT4G00180
AT4G13210
AT4G09110
AT5G24530
AT2G29125
AT1G71930
AT1G32270
AT3G45940
AT5G65165
AT3G23100
AT4G23600
AT1G15640
AT1G32480
AT1G62630
AT5G67060
AT3G16530
AT4G38410
AT5G17320
AT1G56040
AT5G65730
AT2G32550
AT1G05370
AT1G47435
AT4G16540
AT1G68630
AT4G24300
AT4G18390
AT5G48070
AT4G22510
AT3G11435
AT5G52130
AT1G17060
AT1G31040
AT3G21980
AT2G34140
AT1G67865
AT1G68825
AT3G15370
AT3G50755
AT3G11430
AT1G49100
AT1G05510
AT2G45450
AT4G18320
AT2G21050
AT1G05500
AT5G07630
AT2G26695
AT2G23880
AT1G02580
AT3G48300
AT4G15750
AT2G44560
AT3G04290
AT1G66450
AT2G16005
AT4G15500
AT2G36190
AT4G33330
AT5G26100
AT3G11150
AT3G03540
AT4G14250
AT2G28220
AT3G09940
AT1G54740
AT1G17910
AT3G51860
AT1G50760
AT3G44350
AT4G22960
AT2G25940
AT5G17820
AT4G17580
AT5G66400
AT5G46960
AT2G33710
AT2G23240
AT3G45560
AT4G10160
AT1G11510
AT5G01320
AT4G35370
AT2G21260
AT5G39690
AT5G37210
AT1G61660
AT1G52140
AT1G68600
AT1G60410
AT3G60120
AT1G66490
AT4G09820
AT3G53640
AT4G35733
AT2G45760
AT3G07620
AT4G37720
AT5G02890
AT4G17700
AT3G01240
AT1G49110
AT4G10465
AT2G21920
AT2G45220
AT3G43860
AT5G24560
AT1G71050
AT1G77650
AT5G25340
AT2G34210
AT5G36925
AT1G49310
AT1G58360
AT5G43840
AT2G46255
AT2G28010
AT1G69650
AT5G54030
AT5G10180
AT5G58390
AT5G37320
AT5G33355
AT1G19620
AT2G31910
AT2G29040
AT1G59670
AT5G07540
AT1G02980
AT1G26973
AT2G18969
AT2G34610
AT5G66790
AT1G66960
AT2G30750
AT4G11393
AT3G09520
AT2G37010
AT1G74990
AT1G66540
AT1G33840
AT5G42180
AT4G15765
AT5G43610
AT2G46640
AT1G09750
AT4G01355
AT3G22800
AT3G15050
AT1G21326
AT1G31772
AT2G27670
AT3G58360
AT2G41945
AT4G29710
AT1G63370
AT3G43410
AT1G13608
AT1G69795
AT4G18910
AT2G21490
AT4G15310
AT5G41570
AT1G15010
AT3G45610
AT1G06800
AT2G39530
AT1G52830
AT3G13830
AT1G68320
AT1G20800
AT5G30500
AT2G19420
AT2G16810
AT4G39010
AT4G09600
AT3G13290
AT1G23160
AT3G44765
AT1G66860
AT1G26200
AT2G29060
AT3G57540
AT2G25780
AT1G65760
AT1G29870
AT2G25160
AT3G42180
AT2G31480
AT5G20390
AT5G19260
AT4G13290
AT3G27720
AT1G47490
AT3G21710
AT1G20180
AT1G53683
AT1G48810
AT2G03500
AT4G23020
AT5G66590
AT2G47260
AT1G03170
AT1G27461
AT1G47610
AT3G01880
AT1G76830
AT4G00050
AT1G04280
AT4G26950
AT3G09960
AT3G54700
AT1G55020
AT1G29660
AT3G32110
AT5G11977
AT5G41500
AT3G28321
AT2G18130
AT1G65060
AT4G16260
AT4G04490
AT3G20898
AT4G20550
AT3G55240
AT1G53940
AT1G02790
AT4G21840
AT2G19070
AT1G79580
AT3G26934
AT3G25170
AT5G48540
AT1G47389
AT5G53905
AT4G27170
AT3G55515
AT2G34925
AT1G73330
AT5G53815
AT4G33120
AT1G35140
AT4G23380
AT3G52527
AT1G79420
AT2G24800
AT1G52070
AT1G22015
AT3G17060
AT1G33280
AT5G65980
AT5G22410
AT4G08450
AT1G48400
AT1G23240
AT5G56470
AT5G41660
AT5G57785
AT3G49200
AT2G33880
AT1G59810
AT1G28306
AT2G31020
AT1G32650
AT5G41590
AT1G54300
AT1G03840
AT4G16235
AT4G05170
AT5G42600
AT3G26147
AT4G12890
AT5G50300
AT1G70450
AT3G02920
AT5G09970
AT1G78820
AT2G27570
AT1G03790
AT1G68750
AT2G43060
AT2G28550
AT3G62990
AT1G48190
AT5G08360
AT4G18920
AT5G56490
AT5G25420
AT3G49570
AT5G07690
AT5G05120
AT2G18880
AT4G14530
AT1G30790
AT5G64790
AT5G65800
AT3G50260
AT5G25160
AT4G13610
AT2G23960
AT1G56680
AT5G07760
AT2G27120
AT5G36870
AT1G79480
AT1G21850
AT2G36110
AT3G01260
AT5G57780
AT1G44478
AT4G00390
AT2G37430
AT3G09400
AT2G43880
AT3G54320
AT2G26130
AT1G75910
AT1G77200
AT1G55380
AT5G44550
AT4G02270
AT5G65070
AT5G57720
AT5G46810
AT4G15870
AT3G49190
AT2G24810
AT1G20860
AT1G18200
AT3G44300
AT5G17650
AT2G18690
AT1G53025
AT3G26290
AT5G07322
AT5G14011
AT1G28160
AT2G23400
AT4G11390
AT3G44960
AT2G47770
AT5G27530
AT3G48280
AT3G04420
AT1G70970
AT5G11990
AT3G18550
AT1G70920
AT4G14060
AT5G60810
AT4G18850
AT1G08320
AT4G01180
AT5G55856
AT2G28725
AT3G54450
AT5G23020
AT1G01340
AT5G19600
AT5G38010
AT3G23290
AT2G02340
AT3G12900
AT5G61100
AT4G01985
AT1G21960
AT5G63600
AT3G29410
AT5G50160
AT4G12500
AT4G00315
AT2G32890
AT2G23130
AT1G71770
AT4G30290
AT2G18196
AT5G25140
AT1G63245
AT4G05240
AT5G54210
AT5G44360
AT4G30460
AT4G18620
AT3G19410
AT2G15042
AT2G34880
AT4G35165
AT3G04070
AT1G19670
AT2G21030
AT1G14700
AT4G12280
AT2G14220
AT1G27660
AT5G25330
AT5G19530
AT5G05113
AT3G23220
AT5G11930
AT4G09440
AT1G07720
AT3G28600
AT3G20580
AT5G52700
AT2G02650
AT2G02630
AT3G07870
AT3G44540
AT1G26310
AT2G38530
AT5G17950
AT1G52110
AT2G31082
AT4G10865
AT2G35910
AT3G59170
AT1G59453
AT5G39533
AT5G43590
AT5G22160
AT3G61550
AT3G60570
AT1G72000
AT3G28243
AT1G18860
AT4G19170
AT3G60790
AT1G13260
AT5G50360
AT2G20430
AT1G75930
AT1G77700
AT5G38610
AT5G63590
AT3G50180
AT5G47000
AT4G32580
AT1G54550
AT4G22517
AT4G21930
AT5G19110
AT4G02780
AT3G61035
AT1G65890
AT5G59030
AT3G16670
AT3G29050
AT2G12646
AT1G55240
AT5G17700
AT5G16235
AT3G19070
AT1G28650
AT1G46264
AT3G21940
AT1G18760
AT5G58900
AT1G78470
AT1G65210
AT2G01990
AT4G14165
AT2G16220
AT5G55800
AT5G38435
AT2G36750
AT2G27660
AT3G22330
AT5G15500
AT5G50801
AT1G75750
AT5G39240
AT1G52827
AT4G02870
AT2G40805
AT1G65680
AT4G01420
AT3G61198
AT3G44920
AT1G06280
AT4G11950
AT5G01680
AT2G30310
AT3G10080
AT1G11150
AT5G57510
AT3G55130
AT1G08465
AT2G16050
AT1G54890
AT1G32970
AT5G07475
AT5G42590
AT4G29970
AT3G17550
AT2G39010
AT2G27420
AT4G33465
AT4G22110
AT5G07650
AT4G20810
AT5G49250
AT2G17310
AT5G55750
AT2G34740
AT1G33610
AT4G39360
AT1G32910
AT5G27310
AT2G27935
AT1G58450
AT1G78460
AT5G38990
AT4G12220
AT1G12200
AT4G00890
AT1G72490
AT1G21670
AT1G66120
AT1G02950
AT5G40620
AT4G05430
AT4G00300
AT2G18820
AT2G40910
AT1G26815
AT1G65880
AT3G22340
AT5G55135
AT5G18690
AT5G63087
AT5G53740
AT2G27535
AT5G56640
AT3G54340
AT3G04520
AT2G21890
AT3G01085
AT5G59100
AT2G34870
AT4G01516
AT1G33860
AT2G16740
AT5G57090
AT1G09550
AT2G14560
AT1G62210
AT4G19800
AT3G43890
AT2G18340
AT3G30530
AT1G80730
AT1G30840
AT4G11780
AT5G13600
AT4G13310
AT1G80470
AT1G57830
AT1G21330
AT2G27520
AT3G42960
AT3G52820
AT3G12460
AT2G37370
AT3G60647
AT5G42500
AT5G26110
AT1G02550
AT5G37870
AT2G44810
AT5G18990
AT5G02110
AT4G30040
AT2G32470
AT3G43900
AT2G17960
AT1G55740
AT1G48730
AT4G38030
AT2G02010
AT4G10850
AT5G35110
AT4G28530
AT2G22590
AT1G53790
AT1G07175
AT1G08990
AT3G55180
AT2G24540
AT5G12000
AT2G48080
AT1G46336
AT1G78840
AT5G41530
AT4G24310
AT2G43100
AT2G38120
AT4G01450
AT5G07490
AT5G37030
AT5G01900
AT5G54820
AT3G52740
AT3G18518
AT2G37610
AT1G05290
AT1G63205
AT5G41505
AT5G38620
AT2G42350
AT3G53290
AT2G41930
AT2G28710
AT5G22390
AT1G52130
AT5G60970
AT2G41400
AT5G14300
AT3G50290
AT3G03480
AT5G52900
AT5G43890
AT5G39540
AT4G19820
AT2G46140
AT2G04840
AT2G24740
AT1G47810
AT1G33550
AT1G78260
AT4G18680
AT4G23150
AT1G22720
AT5G38386
AT3G27480
AT3G47600
AT3G29680
AT1G51920
AT3G46330
AT5G50760
AT3G14060
AT4G17860
AT3G10590
AT2G34080
AT1G35290
AT1G59630
AT1G45201
AT2G30370
AT4G29020
AT1G12805
AT3G13130
AT1G23050
AT5G62660
AT1G29080
AT1G48990
AT1G08100
AT1G79370
AT3G46614
AT3G15534
AT1G59530
AT3G10572
AT5G03710
AT3G45790
AT3G13228
AT1G63295
AT5G58910
AT5G35550
AT2G43150
AT2G31550
AT5G40780
AT4G37420
AT5G53510
AT5G42690
AT3G44990
AT2G32860
AT4G28850
AT5G22380
AT3G59720
AT2G37170
AT5G39370
AT1G73000
AT5G04120
AT4G23520
AT3G63230
AT1G63880
AT1G67710
AT2G46710
AT3G43270
AT1G58420
AT1G58310
AT1G49860
AT3G26815
AT1G67270
AT1G31620
AT1G49005
AT3G23350
AT3G23190
AT1G18970
AT2G14670
AT5G62848
AT5G26630
AT3G23130
AT3G10340
AT5G52830
AT1G72430
AT1G75490
AT4G33930
AT4G14780
AT2G22810
AT1G11210
AT5G09370
AT4G16220
AT3G15920
AT1G68450
AT5G49630
AT1G66630
AT3G22345
AT3G05727
AT3G09530
AT4G10310
AT1G54590
AT4G23990
AT1G51860
AT4G36820
AT1G31640
AT5G35950
AT1G79680
AT1G58040
AT5G38750
AT5G35770
AT1G27020
AT2G46360
AT4G20590
AT3G19890
AT5G55250
AT4G20230
AT5G22250
AT1G78760
AT1G44542
AT3G48940
AT5G04150
AT5G17430
AT5G10000
AT4G33710
AT2G19630
AT2G40920
AT1G20070
AT4G11770
AT2G25150
AT5G46610
AT1G30740
AT4G14730
AT3G50160
AT5G22180
AT3G47010
AT1G28430
AT5G61600
AT2G19500
AT1G12190
AT2G29940
AT3G06020
AT2G47880
AT2G07560
AT2G28140
AT4G10600
AT1G62990
AT4G25040
AT3G17150
AT2G28120
AT3G58290
AT5G61110
AT1G13370
AT5G53290
AT2G36030
AT1G62560
AT5G41810
AT3G62180
AT1G51490
AT3G11250
AT3G44810
AT2G18320
AT2G14692
AT4G37970
AT3G14480
AT1G58037
AT1G35330
AT1G09500
AT3G23030
AT3G12500
AT2G21100
AT1G69870
AT3G21910
AT2G02080
AT1G24260
AT1G35545
AT5G25960
AT5G38030
AT1G60580
AT1G33760
AT5G56320
AT1G13430
AT1G32975
AT4G15350
AT2G23410
AT1G10380
AT5G63350
AT1G68960
AT4G34250
AT5G47600
AT2G31432
AT2G42425
AT5G06790
AT1G76890
AT3G63110
AT5G53610
AT3G13760
AT3G30725
AT2G27080
AT1G73560
AT1G22360
AT3G62690
AT1G75040
AT1G07985
[truncated: 5,464 more rows]

[truncated: 1 more sheets: Sheet12]
