# Supplementary material
Source: MDPI journal article supplement (https://www.mdpi.com/2075-4655/1/2/8)
Supplement: s1 [file s1 › Supplementary/Tables-S1to6/Table_S4.xls]

## Sheet: Numbers of DMG
				K4							K27							K4
		t0<t2	t0<I	t2<I	L<t0	L<I				t0>t2	t0>I	t2>I	L>t0	L>I				t0<t2 (287)	t0<I (1418)	t2<I (1460)	L<t0 (4885)	L<I (2806)
K4	t0<t2	287						K27	t0>t2	50						K27	t0>t2 (50)	13	11	6	7	9
	t0<I	73	1418						t0>I	31	2547						t0>I (2547)	4	324	361	165	169
	t2<I	31	1115	1434					t2>I	22	2207	2683					t2>I (2683)	1	250	342	166	161
	L<t0	83	83	139	4741				L>t0	9	146	167	2227				L>t0 (2227)	3	6	7	512	293
	L<I	54	265	315	434	2759			L>I	12	471	543	1451	2124			L>I (2124)	4	29	31	232	328
		K4								K27								K4
		t0>t2	t0>I	t2>I	L>t0	L>I				t0<t2	t0<I	t2<I	L<t0	L<I				t0>t2 (401)	t0>I (2506)	t2>I (1981)	L>t0 (3256)	L>I (2865)
K4	t0>t2	401						K27	t0<t2	109						K27	t0<t2 (109)	15	16	9	9	7
	t0>I	175	2506						t0<I	26	1136						t0<I (1136)	11	222	206	66	72
	t2>I	67	1463	1981					t2<I	17	900	989					t2<I (989)	4	158	200	59	68
	L>t0	87	133	116	3256				L<t0	23	57	49	2954				L<t0 (2954)	3	3	4	707	613
	L>I	92	295	251	2286	2865			L<I	13	231	214	1228	1616			L<I (1616)	4	16	11	329	398
		K4									K27
		t0>t2 (401)	t0>I (2506)	t2>I (1981)	L>t0 (3256)	L>I (2865)				t0>t2 (50)	t0>I (2547)	t2>I (2683)	L>t0 (2227)	L>I (2124)
K4	t0<t2 (287)	0	52	130	93	73		K27	t0<t2 (109)	0	25	53	50	41
	t0<I (1418)	38	19	16	1014	564			t0<I (1136)	4	6	5	732	322
	t2<I (1434)	123	26	18	947	545			t2<I (989)	7	5	3	640	266
	L<t0 (4741)	224	1860	1351	89	79			L<t0 (2954)	31	1706	1632	9	67
	L<I (2759)	133	824	604	55	31			L<I (1616)	16	563	556	64	5
		K4								K4
		t0>t2 (401)	t0>I (2506)	t2>I (1981)	L>t0 (3256)	L>I (2865)				t0<t2 (287)	t0<I (1418)	t2<I (1460)	L<t0 (4885)	L<I (2806)
K27	t0>t2 (50)	0	5	10	6	4		K27	t0<t2 (109)	0	2	3	13	1
	t0>I (2547)	86	80	58	483	387			t0<I (1136)	23	19	20	236	104
	t2>I (2683)	84	89	59	453	364			t2<I (989)	27	18	16	226	100
	L>t0 (2227)	61	344	309	45	46			L<t0 (2954)	40	351	376	121	115
	L>I (2124)	63	292	254	43	39			L<I (1616)	23	165	177	37	37

## Sheet: List of changes
	K4 L-I	K27 L-I	K4 L-t0	K27 L-t0	K4 t0-I	K27 t0-I	K4 t0-t2	K27 t0-t2	K4 t2-I	K27 t2-I	No. of changes
AT1G63750	both	1	both	1	0	-1	0	0	0	-1	6
AT4G36280	both	1	both	1	0	-1	0	0	0	-1	6
AT3G18080	both	0	both	0	1	0	-1	0	1	0	5
AT1G01320	both	0	both	0	-1	0	0	0	-1	0	4
AT1G17600	both	0	both	0	1	0	0	0	1	0	4
AT2G33820	both	0	both	0	1	0	0	0	1	0	4
AT2G45500	both	0	both	0	-1	0	0	0	-1	0	4
AT3G16980	both	0	both	0	-1	0	0	0	0	0	3
AT3G17650	both	0	both	0	1	0	0	0	0	0	3
AT3G47460	both	0	both	0	-1	0	0	0	0	0	3
AT3G63510	both	0	both	0	1	0	0	0	0	0	3
AT4G10955	both	0	both	0	0	0	1	0	0	0	3
AT4G10960	both	0	both	0	0	0	1	0	0	0	3
AT2G20300	both	0	both	0	0	0	0	0	0	0	2
AT2G32240	both	0	both	0	0	0	0	0	0	0	2
AT3G07050	both	0	both	0	0	0	0	0	0	0	2
AT3G56130	both	0	both	0	0	0	0	0	0	0	2
AT3G56410	both	0	both	0	0	0	0	0	0	0	2
AT4G30993	both	0	both	0	0	0	0	0	0	0	2
AT5G57590	both	0	both	0	0	0	0	0	0	0	2
AT5G63320	both	0	both	0	0	0	0	0	0	0	2
AT5G66240	both	0	both	0	0	0	0	0	0	0	2
AT1G71830	both	0	1	0	-1	0	0	0	-1	0	4
AT4G36190	both	0	1	0	0	0	0	0	0	0	2
AT3G20270	both	0	0	0	-1	0	0	0	0	0	2
AT2G42890	both	0	-1	0	1	0	0	0	1	0	4
AT4G22753	both	0	-1	0	1	0	0	0	1	0	4
AT1G63860	both	0	-1	0	1	0	0	0	1	0	4
AT1G06670	1	0	both	0	1	0	0	0	both	0	4
AT5G66510	1	0	both	0	both	0	0	0	1	0	4
AT2G29890	1	0	both	0	-1	0	0	0	-1	0	4
AT1G79500	1	0	both	0	both	0	0	0	0	0	3
AT1G79530	1	0	both	0	-1	0	0	0	0	0	3
AT5G66500	1	0	both	0	-1	0	0	0	0	0	3
AT4G30130	1	0	both	0	0	0	0	0	0	0	2
AT5G10510	1	-1	1	-1	-1	1	1	-1	-1	1	10
AT1G02065	1	-1	1	-1	-1	1	-1	0	-1	1	9
AT1G26780	1	-1	1	-1	-1	1	-1	0	-1	1	9
AT2G41990	1	-1	1	-1	-1	1	-1	0	-1	1	9
AT5G65510	1	-1	1	-1	-1	1	-1	0	-1	1	9
AT1G79420	1	-1	1	1	-1	-1	0	1	-1	-1	9
AT1G23380	1	-1	1	-1	-1	1	0	0	-1	1	8
AT1G28360	1	-1	1	-1	-1	1	0	0	-1	1	8
AT1G33170	1	1	1	1	0	-1	-1	0	1	-1	8
AT1G62360	1	-1	1	-1	-1	1	0	0	-1	1	8
AT1G62500	1	0	1	1	-1	-1	-1	0	-1	-1	8
AT1G64620	1	-1	1	-1	-1	1	0	0	-1	1	8
AT1G64670	1	1	1	1	-1	-1	0	0	-1	-1	8
AT1G68360	1	-1	1	-1	-1	-1	0	0	-1	-1	8
AT1G69600	1	-1	1	-1	-1	1	0	0	-1	1	8
AT1G70510	1	-1	1	-1	-1	1	0	0	-1	1	8
AT1G70895	1	-1	1	-1	-1	1	0	0	-1	1	8
AT1G72210	1	-1	1	-1	-1	1	-1	0	-1	0	8
AT1G73590	1	-1	1	-1	-1	1	0	0	-1	1	8
AT1G75710	1	-1	1	-1	0	1	1	0	-1	1	8
AT1G78260	1	-1	1	-1	-1	-1	-1	0	0	-1	8
AT2G16570	1	-1	1	-1	-1	1	0	0	-1	1	8
AT2G18500	1	-1	1	-1	-1	1	0	0	-1	1	8
AT2G24762	1	-1	1	-1	0	-1	-1	0	1	-1	8
AT2G38120	1	-1	1	-1	-1	1	0	0	-1	1	8
AT2G40802	1	-1	1	-1	-1	1	0	0	-1	1	8
AT3G06020	1	-1	1	1	0	-1	-1	0	1	-1	8
AT3G12460	1	-1	1	-1	-1	1	0	0	-1	1	8
AT3G12470	1	-1	1	-1	-1	1	0	0	-1	1	8
AT3G13960	1	-1	1	-1	-1	1	0	0	-1	1	8
AT3G23290	1	-1	1	-1	-1	1	-1	0	0	1	8
AT3G50870	1	-1	1	-1	-1	1	0	0	-1	1	8
AT4G00870	1	-1	1	-1	1	-1	0	0	1	-1	8
AT4G08150	1	-1	1	-1	-1	1	0	0	-1	1	8
AT4G11211	1	-1	1	-1	-1	1	0	0	-1	1	8
AT4G23713	1	-1	1	-1	-1	1	0	0	-1	1	8
AT4G29310	1	0	1	1	-1	-1	-1	0	-1	-1	8
AT4G37750	1	-1	1	-1	-1	1	0	0	-1	1	8
AT5G02030	1	-1	1	-1	-1	1	0	0	-1	1	8
AT5G07180	1	0	1	-1	-1	1	1	0	-1	1	8
AT5G10430	1	-1	1	-1	-1	1	0	0	-1	1	8
AT5G12330	1	-1	1	-1	-1	1	0	0	-1	1	8
AT5G21105	1	-1	1	-1	-1	1	0	0	-1	1	8
AT5G44620	1	-1	1	-1	-1	1	0	0	-1	1	8
AT5G57130	1	-1	1	0	-1	-1	1	0	-1	-1	8
AT5G60250	1	-1	1	-1	-1	1	0	0	-1	1	8
AT5G64910	1	-1	1	-1	-1	1	0	0	-1	1	8
AT5G66840	1	-1	1	-1	-1	1	0	0	-1	1	8
AT1G01200	1	-1	1	-1	-1	1	0	0	-1	1	8
AT1G19830	1	-1	1	-1	1	-1	0	0	1	-1	8
AT1G24020	1	-1	1	-1	1	-1	0	0	1	-1	8
AT1G55020	1	-1	1	-1	-1	1	0	0	-1	1	8
AT2G38110	1	-1	1	-1	1	-1	0	0	1	-1	8
AT5G15250	1	1	1	1	-1	-1	0	0	-1	-1	8
AT1G02810	1	-1	1	-1	-1	1	0	0	0	1	7
AT1G09960	1	-1	1	-1	-1	1	0	0	0	1	7
AT1G11670	1	-1	1	-1	-1	0	0	0	-1	-1	7
AT1G16290	1	0	1	-1	-1	1	0	0	-1	1	7
AT1G19850	1	-1	1	-1	-1	0	1	0	-1	0	7
AT1G28390	1	0	1	-1	-1	1	0	0	-1	1	7
AT1G44740	1	-1	1	-1	0	1	0	0	-1	1	7
AT1G46264	1	-1	1	-1	-1	0	-1	0	-1	0	7
AT1G46552	1	0	1	-1	-1	1	0	0	-1	1	7
AT1G48740	1	-1	1	-1	-1	0	-1	0	-1	0	7
AT1G53160	1	-1	1	-1	-1	0	0	0	-1	-1	7
AT1G62490	1	0	1	1	-1	-1	-1	0	0	-1	7
AT1G67750	1	-1	1	-1	0	-1	-1	0	0	-1	7
AT1G75388	1	-1	1	-1	-1	-1	0	0	0	-1	7
AT1G75390	1	-1	1	-1	-1	-1	0	0	0	-1	7
AT1G80050	1	-1	1	-1	-1	0	-1	0	0	-1	7
AT2G23060	1	-1	1	-1	-1	0	-1	0	-1	0	7
AT2G28660	1	-1	1	0	1	-1	0	0	1	-1	7
AT2G46590	1	-1	1	0	-1	-1	0	0	-1	-1	7
AT3G10600	1	-1	1	-1	-1	1	0	0	-1	0	7
AT3G12970	1	1	1	0	-1	1	0	0	-1	1	7
AT3G20640	1	-1	1	-1	1	-1	0	0	0	-1	7
AT3G20898	1	0	1	0	-1	1	-1	0	-1	1	7
AT3G20900	1	0	1	0	-1	1	-1	0	-1	1	7
AT3G23370	1	-1	1	-1	0	1	0	0	-1	1	7
AT3G29370	1	-1	1	-1	0	-1	-1	0	0	-1	7
AT3G52525	1	-1	1	0	-1	-1	-1	0	0	-1	7
AT3G54820	1	0	1	-1	-1	1	0	0	-1	1	7
AT4G11320	1	-1	1	-1	0	-1	-1	0	0	-1	7
AT4G29150	1	-1	1	-1	-1	1	0	0	-1	0	7
AT4G37580	1	-1	1	-1	-1	1	0	0	-1	0	7
AT4G39480	1	-1	1	-1	0	1	0	0	-1	1	7
AT5G04470	1	-1	1	-1	0	-1	0	0	1	-1	7
AT5G07990	1	-1	1	-1	0	1	-1	0	1	0	7
AT5G25620	1	-1	1	0	0	-1	-1	0	1	-1	7
AT5G38120	1	0	1	0	1	-1	-1	0	1	-1	7
AT5G39890	1	-1	1	0	-1	-1	0	0	-1	-1	7
AT5G54800	1	-1	1	-1	0	1	0	0	-1	1	7
AT5G61480	1	0	1	-1	-1	1	0	0	-1	1	7
AT5G65170	1	0	1	-1	-1	1	0	0	-1	1	7
AT5G65730	1	0	1	1	0	-1	-1	0	1	-1	7
AT5G67020	1	-1	1	-1	-1	1	0	0	-1	0	7
AT1G66540	1	-1	1	-1	-1	1	0	0	0	1	7
AT1G66760	1	-1	1	-1	-1	0	-1	0	0	1	7
AT2G34490	1	0	1	-1	-1	1	0	0	-1	1	7
AT3G12160	1	-1	1	0	-1	-1	0	0	-1	-1	7
AT3G22142	1	0	1	-1	0	1	-1	0	1	1	7
AT3G48550	1	-1	1	0	1	-1	0	0	1	-1	7
AT5G19730	1	-1	1	0	-1	-1	0	0	-1	-1	7
AT5G20710	1	-1	1	-1	1	-1	0	0	1	0	7
AT5G47500	1	0	1	1	1	-1	0	0	1	-1	7
AT5G56880	1	0	1	-1	-1	1	0	0	-1	1	7
AT5G59990	1	-1	1	-1	-1	1	0	0	-1	0	7
AT1G14040	1	-1	1	-1	both	0	0	0	1	1	7
AT1G02205	1	-1	1	-1	1	0	0	0	1	0	6
AT1G04220	1	-1	1	-1	-1	0	0	0	-1	0	6
AT1G11600	1	0	1	-1	-1	0	0	0	-1	1	6
AT1G21310	1	-1	1	-1	-1	0	0	0	-1	0	6
AT1G22490	1	1	1	0	-1	0	-1	0	-1	0	6
AT1G27950	1	0	1	0	-1	1	-1	0	0	1	6
AT1G28290	1	-1	1	-1	-1	0	0	0	-1	0	6
AT1G29160	1	-1	1	-1	-1	0	0	0	-1	0	6
AT1G30100	1	-1	1	-1	-1	0	0	0	-1	0	6
AT1G51355	1	-1	1	-1	0	-1	0	0	0	-1	6
AT1G52140	1	-1	1	0	-1	-1	0	0	0	-1	6
AT1G60390	1	-1	1	1	-1	0	0	0	-1	0	6
AT1G63650	1	-1	1	-1	-1	0	0	0	-1	0	6
AT1G65060	1	1	1	-1	0	1	0	0	0	1	6
AT1G67560	1	-1	1	-1	-1	0	0	0	-1	0	6
AT1G73640	1	0	1	1	-1	-1	0	0	0	-1	6
AT1G75240	1	-1	1	-1	0	-1	0	0	0	-1	6
AT1G80280	1	-1	1	0	1	-1	0	0	0	-1	6
AT2G16580	1	-1	1	0	-1	-1	0	0	0	-1	6
AT2G20100	1	-1	1	0	-1	-1	0	0	0	-1	6
AT2G22590	1	-1	1	-1	-1	0	0	0	-1	0	6
AT2G24700	1	0	1	1	-1	0	-1	0	-1	0	6
AT2G28510	1	-1	1	-1	-1	0	0	0	-1	0	6
AT2G28790	1	-1	1	-1	-1	0	0	0	-1	0	6
AT2G29125	1	0	1	1	-1	-1	0	0	0	-1	6
AT2G29660	1	-1	1	-1	0	-1	0	0	0	-1	6
AT2G32280	1	-1	1	-1	0	-1	0	0	0	-1	6
AT2G36830	1	0	1	1	0	-1	-1	0	0	-1	6
AT2G41230	1	-1	1	-1	-1	0	0	0	-1	0	6
AT2G41231	1	-1	1	-1	-1	0	0	0	-1	0	6
AT2G43800	1	-1	1	-1	-1	0	0	0	-1	0	6
AT2G44840	1	-1	1	-1	0	1	0	0	0	1	6
AT3G02110	1	-1	1	-1	-1	0	0	0	-1	0	6
AT3G12410	1	-1	1	-1	0	1	0	0	0	1	6
AT3G12440	1	-1	1	-1	0	1	0	0	0	1	6
AT3G15604	1	-1	1	-1	0	1	0	0	0	1	6
AT3G15605	1	-1	1	-1	0	1	0	0	0	1	6
AT3G28500	1	-1	1	-1	-1	0	0	0	-1	0	6
AT3G60900	1	-1	1	-1	-1	0	0	0	-1	0	6
AT3G62570	1	-1	1	-1	1	0	0	0	1	0	6
AT4G01410	1	0	1	1	0	-1	0	0	1	-1	6
AT4G02290	1	-1	1	-1	-1	0	0	0	-1	0	6
AT4G03965	1	-1	1	-1	-1	0	0	0	-1	0	6
AT4G09030	1	-1	1	-1	0	0	0	0	-1	1	6
AT4G14320	1	-1	1	-1	-1	0	0	0	-1	0	6
AT4G14723	1	-1	1	-1	-1	0	0	0	-1	0	6
AT4G14740	1	-1	1	-1	-1	0	0	0	-1	0	6
AT4G17680	1	-1	1	-1	0	-1	0	0	0	-1	6
AT4G24050	1	-1	1	-1	0	1	0	0	0	1	6
AT4G25160	1	-1	1	-1	-1	0	0	0	-1	0	6
AT4G28190	1	-1	1	-1	0	1	0	0	0	1	6
AT4G31730	1	-1	1	-1	0	0	-1	0	1	0	6
AT4G36930	1	0	1	0	-1	0	1	-1	-1	0	6
AT4G37650	1	-1	1	-1	-1	0	0	0	-1	0	6
AT4G37870	1	-1	1	-1	-1	0	0	0	-1	0	6
AT4G38215	1	-1	1	0	-1	0	0	0	-1	-1	6
AT5G01747	1	-1	1	1	0	-1	0	0	0	-1	6
AT5G03150	1	-1	1	-1	-1	0	0	0	-1	0	6
AT5G05060	1	-1	1	-1	0	1	0	0	-1	0	6
AT5G07030	1	-1	1	-1	-1	0	-1	0	0	0	6
AT5G07800	1	-1	1	-1	-1	0	0	0	-1	0	6
AT5G13230	1	-1	1	-1	-1	0	0	0	-1	0	6
AT5G14920	1	-1	1	-1	-1	1	0	0	0	0	6
AT5G15120	1	-1	1	-1	-1	0	0	0	-1	0	6
AT5G17850	1	-1	1	-1	-1	0	0	0	-1	0	6
AT5G25830	1	-1	1	0	0	-1	0	0	1	-1	6
AT5G28640	1	-1	1	-1	-1	0	0	0	-1	0	6
AT5G41550	1	-1	1	1	0	-1	0	0	0	-1	6
AT5G41810	1	1	1	1	0	-1	0	0	0	-1	6
AT5G42200	1	-1	1	-1	0	-1	0	0	0	-1	6
AT5G45700	1	-1	1	-1	-1	0	0	0	-1	0	6
AT5G51590	1	-1	1	-1	-1	0	0	0	-1	0	6
AT5G57390	1	-1	1	-1	-1	0	0	0	-1	0	6
AT5G60200	1	-1	1	0	-1	-1	0	0	-1	0	6
AT5G65410	1	-1	1	-1	-1	0	0	0	-1	0	6
AT5G66310	1	-1	1	-1	1	0	0	0	1	0	6
AT5G66710	1	-1	1	-1	-1	0	0	0	-1	0	6
AT1G03710	1	-1	1	-1	-1	0	0	0	-1	0	6
AT1G15760	1	1	1	0	-1	0	0	0	-1	1	6
AT1G58460	1	-1	1	-1	0	0	-1	0	0	-1	6
AT1G69120	1	-1	1	-1	0	-1	0	-1	0	0	6
AT1G74420	1	-1	1	-1	-1	0	-1	0	0	0	6
AT2G26870	1	-1	1	0	-1	-1	0	0	0	-1	6
AT2G38870	1	1	1	1	0	0	-1	0	1	0	6
AT2G45400	1	0	1	-1	0	1	0	0	-1	1	6
AT2G45750	1	1	1	0	-1	0	0	0	-1	1	6
AT3G04290	1	-1	1	-1	1	0	0	0	1	0	6
AT3G12420	1	-1	1	-1	0	1	0	0	0	1	6
AT3G12430	1	-1	1	-1	0	1	0	0	0	1	6
AT3G13660	1	-1	1	-1	0	0	-1	0	1	0	6
AT3G20975	1	1	1	-1	0	1	0	0	0	1	6
AT3G22770	1	1	1	1	0	-1	0	0	0	-1	6
AT3G52490	1	-1	1	0	0	-1	0	0	1	-1	6
AT3G59845	1	-1	1	-1	0	1	0	0	0	1	6
AT3G61850	1	-1	1	-1	0	-1	0	0	0	-1	6
AT4G15920	1	0	1	0	0	-1	-1	0	1	-1	6
AT4G16447	1	-1	1	-1	0	-1	0	0	0	-1	6
AT4G18970	1	0	1	0	1	-1	0	0	1	-1	6
AT4G26255	1	-1	1	-1	0	-1	0	0	0	-1	6
AT5G15150	1	-1	1	-1	0	-1	0	0	0	-1	6
AT5G46730	1	-1	1	-1	-1	0	0	0	-1	0	6
AT5G46880	1	0	1	0	-1	-1	0	0	-1	-1	6
AT2G41470	1	-1	1	-1	0	1	0	0	0	both	6
AT1G02640	1	0	1	0	-1	0	-1	0	-1	0	5
AT1G02670	1	0	1	0	-1	-1	0	0	-1	0	5
AT1G08070	1	-1	1	-1	-1	0	0	0	0	0	5
AT1G08230	1	-1	1	0	0	0	-1	0	0	-1	5
AT1G09812	1	0	1	0	-1	0	-1	0	-1	0	5
AT1G10657	1	0	1	0	0	-1	-1	0	0	-1	5
AT1G10750	1	-1	1	-1	0	0	0	0	-1	0	5
AT1G16060	1	0	1	-1	-1	0	0	0	-1	0	5
AT1G18250	1	0	1	-1	-1	0	0	0	-1	0	5
AT1G23000	1	0	1	-1	-1	0	0	0	-1	0	5
AT1G26190	1	0	1	0	-1	0	-1	0	-1	0	5
AT1G31310	1	-1	1	-1	-1	0	0	0	0	0	5
AT1G31770	1	0	1	0	-1	0	-1	0	-1	0	5
AT1G32240	1	-1	1	-1	0	0	0	0	0	1	5
AT1G48410	1	0	1	0	-1	0	1	0	-1	0	5
AT1G53860	1	0	1	0	-1	0	1	0	-1	0	5
AT1G57820	1	0	1	-1	-1	0	0	0	-1	0	5
AT1G69690	1	-1	1	0	0	-1	0	0	0	-1	5
AT1G77790	1	-1	1	-1	-1	0	0	0	0	0	5
AT1G78170	1	-1	1	-1	0	-1	0	0	0	0	5
AT1G78370	1	0	1	-1	0	0	-1	0	1	0	5
AT2G15090	1	1	1	1	0	0	0	0	-1	0	5
AT2G17770	1	0	1	0	-1	0	-1	0	-1	0	5
AT2G28500	1	-1	1	0	0	-1	0	0	0	-1	5
AT2G31141	1	0	1	0	-1	0	-1	0	-1	0	5
AT2G31150	1	0	1	0	-1	0	-1	0	-1	0	5
AT2G32990	1	-1	1	-1	-1	0	0	0	0	0	5
AT2G34710	1	0	1	0	-1	0	1	0	-1	0	5
AT2G38060	1	-1	1	-1	-1	0	0	0	0	0	5
AT2G39175	1	0	1	-1	-1	0	0	0	-1	0	5
AT2G42840	1	1	1	0	-1	0	0	0	-1	0	5
AT2G45190	1	0	1	-1	-1	0	0	0	-1	0	5
AT3G02030	1	0	1	0	-1	0	1	0	-1	0	5
AT3G02040	1	0	1	0	-1	0	1	0	-1	0	5
AT3G02050	1	0	1	0	-1	0	1	0	-1	0	5
AT3G05980	1	0	1	0	1	0	1	0	1	0	5
AT3G10100	1	-1	1	-1	-1	0	0	0	0	0	5
AT3G10190	1	-1	1	-1	0	0	0	0	0	-1	5
AT3G10290	1	-1	1	-1	0	0	0	0	-1	0	5
AT3G16380	1	0	1	1	0	-1	0	0	1	0	5
AT3G17280	1	0	1	1	0	-1	0	0	0	-1	5
AT3G18980	1	0	1	1	0	-1	0	0	0	-1	5
AT3G24340	1	0	1	0	-1	0	1	0	-1	0	5
AT3G27220	1	0	1	0	-1	0	-1	0	-1	0	5
AT3G27230	1	0	1	0	-1	0	-1	0	-1	0	5
AT3G30775	1	0	1	0	0	0	-1	0	1	-1	5
AT3G49840	1	0	1	0	-1	0	1	0	-1	0	5
AT3G57520	1	0	1	0	-1	0	-1	0	1	0	5
AT3G61950	1	0	1	0	1	0	-1	0	1	0	5
AT3G63200	1	0	1	-1	0	1	0	0	0	1	5
AT3G63370	1	0	1	0	-1	0	-1	0	-1	0	5
AT4G00310	1	-1	1	-1	-1	0	0	0	0	0	5
AT4G03270	1	0	1	1	1	-1	0	0	0	0	5
AT4G16680	1	0	1	0	-1	0	1	0	-1	0	5
AT4G21970	1	-1	1	0	0	-1	0	0	0	-1	5
AT4G24060	1	-1	1	-1	-1	0	0	0	0	0	5
AT4G24080	1	-1	1	-1	0	0	0	0	-1	0	5
AT4G30250	1	0	1	0	-1	0	1	0	-1	0	5
AT4G31620	1	0	1	0	-1	0	-1	0	-1	0	5
AT5G01200	1	-1	1	-1	0	0	0	0	-1	0	5
AT5G02370	1	-1	1	0	0	-1	0	0	0	-1	5
AT5G02380	1	-1	1	0	0	-1	0	0	0	-1	5
AT5G04770	1	1	1	0	0	1	0	0	0	1	5
AT5G06150	1	0	1	1	0	-1	0	0	0	-1	5
AT5G11540	1	-1	1	-1	0	0	-1	0	0	0	5
AT5G13000	1	0	1	1	0	-1	0	0	0	-1	5
AT5G23780	1	0	1	1	-1	-1	0	0	0	0	5
AT5G37630	1	0	1	0	-1	0	-1	0	-1	0	5
AT5G39240	1	-1	1	0	0	-1	0	0	0	-1	5
AT5G42280	1	-1	1	0	0	-1	0	0	0	-1	5
AT5G43810	1	0	1	0	-1	1	0	0	0	1	5
AT5G48480	1	-1	1	-1	0	0	0	0	-1	0	5
AT5G61090	1	-1	1	-1	-1	0	0	0	0	0	5
AT5G61880	1	-1	1	-1	-1	0	0	0	0	0	5
AT5G62210	1	0	1	-1	0	1	0	0	0	1	5
AT5G63540	1	0	1	0	-1	0	-1	0	-1	0	5
AT5G64310	1	-1	1	-1	0	0	-1	0	0	0	5
AT5G65390	1	0	1	-1	-1	0	0	0	-1	0	5
AT5G66230	1	-1	1	0	-1	0	0	0	-1	0	5
AT5G66740	1	0	1	1	-1	0	0	0	-1	0	5
AT1G19540	1	-1	1	0	0	-1	0	0	0	-1	5
AT1G22470	1	0	1	1	0	-1	0	0	0	-1	5
AT1G62035	1	-1	1	0	0	-1	0	0	0	-1	5
AT1G70560	1	-1	1	0	-1	0	-1	0	0	0	5
AT1G78950	1	-1	1	-1	0	1	0	0	0	0	5
AT2G24030	1	-1	1	-1	-1	0	0	0	0	0	5
AT2G30370	1	-1	1	-1	-1	0	0	0	0	0	5
AT2G34060	1	0	1	1	0	-1	0	0	0	-1	5
AT3G06360	1	-1	1	-1	0	1	0	0	0	0	5
AT3G17050	1	0	1	-1	0	1	0	0	0	1	5
AT3G56810	1	1	1	1	0	0	0	0	0	-1	5
AT4G01525	1	-1	1	0	-1	0	0	0	-1	0	5
AT4G15960	1	0	1	-1	0	1	0	0	0	1	5
AT4G23500	1	0	1	0	0	-1	-1	0	0	-1	5
AT4G37730	1	-1	1	-1	-1	0	0	0	0	0	5
AT5G05040	1	-1	1	-1	0	0	0	0	0	1	5
AT5G45630	1	-1	1	-1	-1	0	0	0	0	0	5
AT5G57123	1	0	1	1	0	-1	0	0	0	-1	5
AT2G01008	1	0	1	1	1	0	0	0	1	0	5
AT2G01010	1	0	1	1	1	0	0	0	1	0	5
AT2G01020	1	0	1	1	1	0	0	0	1	0	5
AT2G01021	1	0	1	1	1	0	0	0	1	0	5
AT2G01022	1	0	1	1	1	0	0	0	1	0	5
AT2G01023	1	0	1	1	1	0	0	0	1	0	5
AT3G41761	1	0	1	1	1	0	0	0	1	0	5
AT3G41762	1	0	1	1	1	0	0	0	1	0	5
AT3G41768	1	0	1	1	1	0	0	0	1	0	5
AT3G41979	1	0	1	1	1	0	0	0	1	0	5
AT4G36270	1	0	1	both	0	both	0	0	0	1	5
AT5G07770	1	0	1	0	-1	-1	0	0	both	0	5
AT1G02650	1	0	1	1	-1	0	0	0	0	0	4
AT1G02690	1	0	1	0	-1	0	0	0	-1	0	4
AT1G02730	1	0	1	0	-1	0	0	0	-1	0	4
AT1G02800	1	0	1	0	-1	0	-1	0	0	0	4
AT1G03180	1	0	1	0	-1	0	0	0	-1	0	4
AT1G04050	1	0	1	0	-1	0	0	0	-1	0	4
AT1G04090	1	0	1	0	-1	0	-1	0	0	0	4
AT1G05420	1	-1	1	-1	0	0	0	0	0	0	4
AT1G05470	1	0	1	0	-1	0	0	0	-1	0	4
AT1G05710	1	0	1	0	-1	0	0	0	-1	0	4
AT1G06310	1	-1	1	-1	0	0	0	0	0	0	4
AT1G06475	1	0	1	0	-1	0	0	0	-1	0	4
AT1G06490	1	0	1	0	-1	0	0	0	-1	0	4
AT1G09160	1	0	1	0	1	0	0	0	1	0	4
AT1G09470	1	-1	1	-1	0	0	0	0	0	0	4
AT1G09650	1	0	1	0	-1	0	0	0	-1	0	4
AT1G10710	1	0	1	0	-1	0	0	0	-1	0	4
AT1G11000	1	0	1	0	-1	0	0	0	-1	0	4
AT1G11112	1	0	1	0	-1	0	0	0	-1	0	4
AT1G11120	1	0	1	0	-1	0	0	0	-1	0	4
AT1G11130	1	0	1	0	-1	0	0	0	-1	0	4
AT1G12370	1	0	1	0	-1	0	0	0	-1	0	4
AT1G14350	1	0	1	0	-1	0	-1	0	0	0	4
AT1G14440	1	0	1	0	-1	0	0	0	-1	0	4
AT1G14685	1	0	1	0	-1	0	0	0	-1	0	4
AT1G14750	1	0	1	0	-1	0	0	0	-1	0	4
AT1G15310	1	0	1	0	-1	0	0	0	-1	0	4
AT1G15480	1	0	1	0	-1	0	0	0	-1	0	4
AT1G16070	1	0	1	0	-1	0	0	0	-1	0	4
AT1G16080	1	0	1	0	-1	0	0	0	-1	0	4
AT1G16300	1	0	1	0	-1	0	0	0	-1	0	4
AT1G16630	1	0	1	0	-1	0	0	0	-1	0	4
AT1G18550	1	0	1	0	1	0	0	0	1	0	4
AT1G19210	1	0	1	0	-1	0	0	0	-1	0	4
AT1G20570	1	0	1	0	-1	0	0	0	-1	0	4
AT1G20930	1	0	1	0	-1	0	0	0	-1	0	4
AT1G21740	1	0	1	0	-1	0	0	0	-1	0	4
AT1G25450	1	0	1	0	0	0	-1	0	1	0	4
AT1G25510	1	-1	1	-1	0	0	0	0	0	0	4
AT1G26540	1	0	1	0	-1	0	0	0	-1	0	4
AT1G26550	1	0	1	0	-1	0	0	0	-1	0	4
AT1G26770	1	0	1	0	-1	0	-1	0	0	0	4
AT1G27460	1	0	1	0	-1	0	0	0	-1	0	4
AT1G27500	1	0	1	0	-1	0	0	0	-1	0	4
AT1G27880	1	0	1	0	-1	0	0	0	-1	0	4
AT1G27960	1	0	1	0	-1	0	-1	0	0	0	4
AT1G28110	1	0	1	0	-1	0	-1	0	0	0	4
AT1G29195	1	-1	1	-1	0	0	0	0	0	0	4
AT1G29980	1	0	1	0	-1	0	0	0	-1	0	4
AT1G30040	1	-1	1	0	0	-1	0	0	0	0	4
AT1G30600	1	0	1	0	-1	0	0	0	-1	0	4
AT1G30820	1	0	1	0	0	0	-1	0	1	0	4
AT1G30960	1	0	1	0	0	0	1	0	-1	0	4
AT1G31850	1	0	1	0	-1	0	0	0	-1	0	4
AT1G31870	1	0	1	0	-1	0	0	0	-1	0	4
AT1G31860	1	0	1	0	-1	0	0	0	-1	0	4
AT1G32120	1	0	1	0	-1	0	0	0	-1	0	4
AT1G32190	1	0	1	0	-1	0	0	0	-1	0	4
AT1G32930	1	0	1	0	-1	0	0	0	1	0	4
AT1G33415	1	0	1	0	-1	0	0	0	-1	0	4
AT1G33420	1	0	1	0	-1	0	0	0	-1	0	4
AT1G44110	1	0	1	0	-1	0	0	0	-1	0	4
AT1G48580	1	0	1	0	-1	0	0	0	-1	0	4
AT1G49730	1	0	1	0	-1	0	-1	0	0	0	4
AT1G49910	1	0	1	0	-1	0	0	0	-1	0	4
AT1G50460	1	0	1	0	-1	0	0	0	-1	0	4
AT1G50910	1	0	1	0	-1	0	0	0	-1	0	4
AT1G50920	1	0	1	0	-1	0	0	0	-1	0	4
AT1G52530	1	0	1	0	-1	0	0	0	-1	0	4
AT1G54385	1	0	1	0	-1	0	0	0	-1	0	4
AT1G54840	1	0	1	0	-1	0	0	0	-1	0	4
AT1G54850	1	0	1	0	-1	0	0	0	-1	0	4
AT1G54960	1	0	1	0	-1	0	0	0	-1	0	4
AT1G59640	1	0	1	0	-1	0	0	0	-1	0	4
AT1G62870	1	0	1	0	0	0	-1	0	1	0	4
AT1G62950	1	0	1	0	-1	0	0	0	-1	0	4
AT1G63020	1	0	1	0	-1	0	0	0	-1	0	4
AT1G63300	1	0	1	0	-1	0	0	0	-1	0	4
AT1G64180	1	0	1	0	-1	0	0	0	-1	0	4
AT1G65590	1	0	1	0	-1	0	0	0	-1	0	4
AT1G65710	1	0	1	0	-1	0	0	0	-1	0	4
AT1G69040	1	0	1	0	-1	0	0	0	-1	0	4
AT1G69210	1	0	1	0	-1	0	0	0	-1	0	4
AT1G69220	1	0	1	0	-1	0	0	0	-1	0	4
AT1G69580	1	0	1	0	-1	0	0	0	-1	0	4
AT1G70210	1	0	1	0	-1	0	-1	0	0	0	4
AT1G71828	1	0	1	0	-1	0	0	0	-1	0	4
AT1G72670	1	0	1	0	-1	0	0	0	-1	0	4
AT1G72810	1	-1	1	-1	0	0	0	0	0	0	4
AT1G73690	1	0	1	0	-1	0	0	0	-1	0	4
AT1G75050	1	0	1	0	-1	0	0	0	-1	0	4
AT1G75060	1	0	1	0	-1	0	0	0	-1	0	4
AT1G75150	1	0	1	0	-1	0	0	0	-1	0	4
AT1G75590	1	0	1	0	0	-1	0	0	0	-1	4
AT1G75640	1	0	1	0	-1	0	0	0	-1	0	4
AT1G75780	1	0	1	0	-1	0	0	0	-1	0	4
AT1G76410	1	-1	1	-1	0	0	0	0	0	0	4
AT1G77000	1	0	1	0	-1	0	0	0	-1	0	4
AT1G77390	1	0	1	0	-1	0	0	0	-1	0	4
AT1G77860	1	0	1	0	1	0	0	0	1	0	4
AT1G79820	1	0	1	0	-1	0	0	0	-1	0	4
AT1G80060	1	0	1	0	-1	0	0	0	-1	0	4
AT1G80070	1	0	1	0	-1	0	0	0	-1	0	4
AT2G01210	1	0	1	0	-1	0	0	0	-1	0	4
AT2G01630	1	0	1	0	-1	0	0	0	-1	0	4
AT2G01950	1	0	1	0	-1	0	0	0	-1	0	4
AT2G02130	1	-1	1	0	0	0	-1	0	0	0	4
AT2G02170	1	0	1	0	-1	0	0	0	-1	0	4
AT2G03090	1	0	1	0	-1	0	0	0	-1	0	4
AT2G06200	1	0	1	0	-1	0	0	0	-1	0	4
AT2G07690	1	0	1	0	-1	0	0	0	-1	0	4
AT2G14890	1	-1	1	-1	0	0	0	0	0	0	4
AT2G16440	1	0	1	0	-1	0	0	0	-1	0	4
AT2G16630	1	0	1	0	-1	0	0	0	-1	0	4
AT2G16780	1	0	1	0	-1	0	0	0	-1	0	4
AT2G16850	1	0	1	0	0	1	0	0	0	1	4
AT2G18000	1	0	1	0	-1	0	0	0	-1	0	4
AT2G19090	1	0	1	0	-1	0	0	0	-1	0	4
AT2G19910	1	0	1	0	-1	0	0	0	-1	0	4
AT2G20515	1	-1	1	-1	0	0	0	0	0	0	4
AT2G20550	1	0	1	0	-1	0	0	0	-1	0	4
AT2G20590	1	0	1	0	-1	0	0	0	-1	0	4
AT2G22680	1	-1	1	-1	0	0	0	0	0	0	4
AT2G24490	1	0	1	0	-1	0	0	0	-1	0	4
AT2G26180	1	0	1	0	-1	0	0	0	-1	0	4
AT2G27228	1	0	1	0	-1	0	0	0	-1	0	4
AT2G27229	1	0	1	0	-1	0	0	0	-1	0	4
AT2G27230	1	0	1	0	-1	0	0	0	-1	0	4
AT2G27510	1	0	1	0	-1	0	0	0	-1	0	4
AT2G28630	1	-1	1	-1	0	0	0	0	0	0	4
AT2G29550	1	0	1	0	-1	0	0	0	-1	0	4
AT2G29560	1	0	1	0	-1	0	0	0	-1	0	4
AT2G30500	1	0	1	0	-1	0	0	0	-1	0	4
AT2G31270	1	0	1	0	-1	0	0	0	-1	0	4
AT2G31725	1	0	1	0	-1	0	0	0	-1	0	4
AT2G31730	1	0	1	0	-1	0	0	0	-1	0	4
AT2G33640	1	0	1	0	-1	0	0	0	-1	0	4
AT2G33630	1	0	1	0	-1	0	0	0	-1	0	4
AT2G33810	1	0	1	0	1	0	0	0	1	0	4
AT2G33815	1	0	1	0	1	0	0	0	1	0	4
AT2G34650	1	0	1	0	-1	0	0	0	-1	0	4
AT2G34670	1	0	1	0	-1	0	0	0	-1	0	4
AT2G34970	1	0	1	0	1	0	0	0	1	0	4
AT2G35120	1	0	1	0	-1	0	0	0	-1	0	4
AT2G35350	1	0	1	0	-1	0	0	0	-1	0	4
AT2G35637	1	-1	1	-1	0	0	0	0	0	0	4
AT2G35640	1	-1	1	-1	0	0	0	0	0	0	4
AT2G36026	1	0	1	0	-1	0	0	0	-1	0	4
AT2G36030	1	0	1	0	-1	0	0	0	-1	0	4
AT2G36350	1	0	1	0	-1	0	0	0	-1	0	4
AT2G36570	1	0	1	-1	-1	0	0	0	0	0	4
AT2G36870	1	0	1	0	-1	0	-1	0	0	0	4
AT2G37000	1	0	1	-1	0	1	0	0	0	0	4
AT2G37040	1	0	1	0	0	1	0	0	0	1	4
AT2G37060	1	0	1	0	-1	0	0	0	-1	0	4
AT2G37180	1	1	1	1	0	0	0	0	0	0	4
AT2G37310	1	0	1	0	-1	0	0	0	-1	0	4
AT2G37320	1	0	1	0	-1	0	0	0	-1	0	4
AT2G37510	1	0	1	0	-1	0	0	0	-1	0	4
AT2G37620	1	0	1	0	-1	0	0	0	-1	0	4
AT2G37630	1	0	1	0	-1	0	0	0	-1	0	4
AT2G37640	1	0	1	0	-1	0	0	0	-1	0	4
AT2G37980	1	0	1	0	-1	0	0	0	-1	0	4
AT2G38160	1	0	1	0	-1	0	0	0	-1	0	4
AT2G38370	1	0	1	0	-1	0	0	0	-1	0	4
AT2G38540	1	-1	1	-1	0	0	0	0	0	0	4
AT2G39700	1	0	1	0	-1	0	0	0	-1	0	4
AT2G41550	1	0	1	0	-1	0	0	0	-1	0	4
AT2G42200	1	0	1	0	0	0	-1	0	1	0	4
AT2G42290	1	0	1	0	-1	0	0	0	-1	0	4
AT2G44180	1	0	1	0	-1	0	0	0	-1	0	4
AT2G44190	1	0	1	0	-1	0	0	0	-1	0	4
AT2G44830	1	0	1	0	-1	0	0	0	-1	0	4
AT2G45080	1	0	1	0	-1	0	-1	0	0	0	4
AT2G45290	1	0	1	0	-1	0	0	0	-1	0	4
AT2G45340	1	0	1	0	-1	0	-1	0	0	0	4
AT2G45480	1	0	1	0	-1	0	0	0	-1	0	4
AT2G45490	1	0	1	0	-1	0	0	0	-1	0	4
AT2G45870	1	-1	1	-1	0	0	0	0	0	0	4
AT2G46980	1	0	1	0	-1	0	0	0	-1	0	4
AT2G47010	1	0	1	0	0	0	1	0	-1	0	4
AT2G47230	1	0	1	0	-1	0	0	0	-1	0	4
AT3G01330	1	0	1	0	-1	0	0	0	-1	0	4
AT3G02780	1	0	1	0	-1	0	0	0	-1	0	4
AT3G02790	1	0	1	0	-1	0	0	0	-1	0	4
AT3G04850	1	0	1	0	-1	0	0	0	-1	0	4
AT3G05480	1	0	1	0	-1	0	0	0	-1	0	4
AT3G05550	1	0	1	0	-1	0	0	0	-1	0	4
AT3G05600	1	0	1	0	-1	0	0	0	-1	0	4
AT3G06160	1	0	1	0	1	0	0	0	1	0	4
AT3G06290	1	0	1	0	0	0	1	0	-1	0	4
AT3G06435	1	-1	1	-1	0	0	0	0	0	0	4
AT3G06520	1	0	1	0	-1	0	0	0	-1	0	4
AT3G07540	1	-1	1	-1	0	0	0	0	0	0	4
AT3G07960	1	0	1	0	-1	0	0	0	-1	0	4
AT3G09060	1	0	1	0	-1	0	0	0	-1	0	4
AT3G09070	1	0	1	0	-1	0	0	0	-1	0	4
AT3G10690	1	0	1	0	-1	0	0	0	-1	0	4
AT3G12060	1	0	1	0	-1	0	0	0	-1	0	4
AT3G12610	1	0	1	0	1	0	0	0	1	0	4
AT3G12860	1	0	1	0	-1	0	0	0	-1	0	4
AT3G13175	1	-1	1	-1	0	0	0	0	0	0	4
AT3G13180	1	0	1	0	-1	0	0	0	-1	0	4
AT3G13190	1	0	1	0	-1	0	0	0	-1	0	4
AT3G13200	1	0	1	0	-1	0	0	0	-1	0	4
AT3G13880	1	0	1	0	-1	0	0	0	-1	0	4
AT3G13980	1	-1	1	-1	0	0	0	0	0	0	4
AT3G14190	1	0	1	0	-1	0	0	0	-1	0	4
AT3G14230	1	0	1	0	-1	0	-1	0	0	0	4
AT3G14580	1	0	1	0	-1	0	0	0	-1	0	4
AT3G14870	1	0	1	0	-1	0	0	0	-1	0	4
AT3G15340	1	0	1	0	-1	0	0	0	-1	0	4
AT3G15460	1	0	1	0	0	0	-1	0	1	0	4
AT3G15820	1	0	1	0	0	-1	0	0	0	-1	4
AT3G16150	1	-1	1	-1	0	0	0	0	0	0	4
AT3G16490	1	0	1	0	-1	0	-1	0	0	0	4
AT3G16620	1	0	1	0	-1	0	0	0	-1	0	4
AT3G17360	1	0	1	0	-1	0	0	0	-1	0	4
AT3G17680	1	0	1	0	-1	0	0	0	-1	0	4
AT3G17820	1	0	1	0	-1	0	-1	0	0	0	4
AT3G17998	1	0	1	0	-1	0	-1	0	0	0	4
AT3G18000	1	0	1	0	-1	0	-1	0	0	0	4
AT3G18070	1	0	1	0	-1	0	0	0	-1	0	4
AT3G18850	1	0	1	0	1	0	0	0	1	0	4
AT3G19050	1	0	1	0	-1	0	0	0	-1	0	4
AT3G20080	1	0	1	0	1	0	0	0	1	0	4
AT3G21100	1	0	1	0	-1	0	0	0	-1	0	4
AT3G21240	1	0	1	0	-1	0	0	0	-1	0	4
AT3G21465	1	0	1	0	-1	0	0	0	-1	0	4
AT3G22410	1	0	1	0	-1	0	0	0	-1	0	4
AT3G22810	1	0	1	0	-1	0	0	0	-1	0	4
AT3G23890	1	0	1	0	-1	0	0	0	-1	0	4
AT3G24770	1	-1	1	-1	0	0	0	0	0	0	4
AT3G25100	1	0	1	0	-1	0	0	0	-1	0	4
AT3G26932	1	0	1	0	-1	0	0	0	-1	0	4
AT3G27190	1	0	1	0	-1	0	0	0	-1	0	4
AT3G42660	1	0	1	0	-1	0	0	0	-1	0	4
AT3G48660	1	0	1	0	-1	0	0	0	-1	0	4
AT3G49740	1	0	1	0	-1	0	0	0	-1	0	4
AT3G50070	1	0	1	0	-1	0	0	0	-1	0	4
AT3G50430	1	0	1	0	1	0	0	0	1	0	4
AT3G50890	1	-1	1	-1	0	0	0	0	0	0	4
AT3G51280	1	0	1	0	-1	0	0	0	-1	0	4
AT3G51290	1	0	1	0	-1	0	0	0	-1	0	4
AT3G51740	1	0	1	0	-1	0	0	0	-1	0	4
AT3G52170	1	0	1	0	-1	0	0	0	-1	0	4
AT3G52910	1	0	1	0	-1	0	-1	0	0	0	4
AT3G53190	1	0	1	0	-1	0	0	0	-1	0	4
AT3G54000	1	0	1	0	-1	0	0	0	-1	0	4
AT3G54180	1	0	1	0	-1	0	0	0	-1	0	4
AT3G54270	1	-1	1	-1	0	0	0	0	0	0	4
AT3G54390	1	0	1	0	-1	0	0	0	-1	0	4
AT3G54400	1	0	1	0	-1	0	-1	0	0	0	4
AT3G54870	1	0	1	0	-1	0	0	0	-1	0	4
AT3G56100	1	0	1	0	-1	0	0	0	-1	0	4
AT3G57500	1	0	1	0	-1	0	0	0	-1	0	4
AT3G57670	1	-1	1	-1	0	0	0	0	0	0	4
AT3G57920	1	0	1	0	0	0	-1	0	1	0	4
AT3G59190	1	0	1	0	-1	0	0	0	-1	0	4
AT3G59890	1	0	1	0	-1	0	0	0	-1	0	4
AT3G59900	1	0	1	0	-1	0	0	0	-1	0	4
AT3G61250	1	0	1	0	-1	0	0	0	-1	0	4
AT3G61590	1	0	1	0	-1	0	0	0	-1	0	4
AT3G61830	1	0	1	0	-1	0	0	0	-1	0	4
AT3G61897	1	-1	1	-1	0	0	0	0	0	0	4
AT3G61898	1	-1	1	-1	0	0	0	0	0	0	4
AT3G62050	1	0	1	0	-1	0	0	0	-1	0	4
AT3G62528	1	0	1	0	-1	0	0	0	-1	0	4
AT3G62530	1	0	1	0	-1	0	0	0	-1	0	4
AT3G63240	1	0	1	0	-1	0	0	0	-1	0	4
AT3G63430	1	0	1	0	-1	0	0	0	-1	0	4
AT3G63440	1	0	1	0	-1	0	0	0	-1	0	4
AT3G63445	1	0	1	0	-1	0	0	0	-1	0	4
AT3G63450	1	0	1	0	-1	0	0	0	-1	0	4
AT4G00020	1	0	1	0	-1	0	0	0	-1	0	4
AT4G00430	1	0	1	0	-1	0	0	0	-1	0	4
AT4G00820	1	0	1	0	-1	0	0	0	-1	0	4
AT4G00905	1	0	1	0	-1	0	0	0	-1	0	4
AT4G02110	1	0	1	0	-1	0	0	0	-1	0	4
AT4G02330	1	-1	1	-1	0	0	0	0	0	0	4
AT4G03100	1	0	1	0	-1	0	0	0	-1	0	4
AT4G04920	1	0	1	0	-1	0	0	0	-1	0	4
AT4G06744	1	0	1	0	0	0	-1	0	0	1	4
AT4G08950	1	-1	1	0	0	-1	0	0	0	0	4
AT4G10265	1	0	1	0	-1	0	-1	0	0	0	4
AT4G10630	1	0	1	0	-1	0	0	0	-1	0	4
AT4G11450	1	0	1	0	-1	0	0	0	-1	0	4
AT4G11990	1	0	1	0	-1	0	0	0	-1	0	4
AT4G12400	1	0	1	0	-1	0	0	0	-1	0	4
AT4G13370	1	0	1	0	-1	0	0	0	-1	0	4
AT4G13540	1	0	1	0	0	0	-1	0	1	0	4
AT4G14110	1	0	1	0	-1	0	0	0	-1	0	4
AT4G14120	1	0	1	0	-1	0	0	0	-1	0	4
AT4G14310	1	0	1	0	-1	0	0	0	-1	0	4
AT4G14330	1	0	1	0	-1	0	0	0	-1	0	4
AT4G16140	1	-1	1	-1	0	0	0	0	0	0	4
AT4G16480	1	0	1	0	-1	0	0	0	-1	0	4
AT4G16970	1	0	1	0	-1	0	0	0	-1	0	4
AT4G17410	1	0	1	0	-1	0	0	0	-1	0	4
AT4G18470	1	0	1	0	-1	0	0	0	-1	0	4
AT4G18670	1	-1	1	-1	0	0	0	0	0	0	4
AT4G20270	1	0	1	0	-1	0	0	0	-1	0	4
AT4G20940	1	0	1	0	-1	0	0	0	-1	0	4
AT4G21065	1	0	1	0	-1	0	0	0	-1	0	4
AT4G21550	1	0	1	0	-1	0	0	0	-1	0	4
AT4G22250	1	-1	1	-1	0	0	0	0	0	0	4
AT4G22860	1	0	1	0	-1	0	0	0	-1	0	4
AT4G24580	1	0	1	0	-1	0	0	0	-1	0	4
AT4G25240	1	0	1	0	-1	0	0	0	-1	0	4
AT4G26330	1	0	1	0	-1	0	0	0	-1	0	4
AT4G26760	1	0	1	0	-1	0	0	0	-1	0	4
AT4G27270	1	0	1	0	1	0	0	0	1	0	4
AT4G29160	1	0	1	0	-1	0	0	0	-1	0	4
AT4G29170	1	0	1	0	-1	0	0	0	-1	0	4
AT4G30090	1	0	1	0	-1	0	0	0	-1	0	4
AT4G30520	1	0	1	0	-1	0	0	0	-1	0	4
AT4G30610	1	0	1	0	-1	0	0	0	-1	0	4
AT4G30850	1	0	1	0	-1	0	0	0	-1	0	4
AT4G31890	1	0	1	0	-1	0	0	0	-1	0	4
AT4G31980	1	0	1	0	-1	0	0	0	-1	0	4
AT4G32200	1	-1	1	-1	0	0	0	0	0	0	4
AT4G32295	1	0	1	0	-1	0	0	0	-1	0	4
AT4G33160	1	0	1	0	-1	0	0	0	-1	0	4
AT4G33170	1	0	1	0	-1	0	0	0	-1	0	4
AT4G33260	1	0	1	0	-1	0	0	0	-1	0	4
AT4G34160	1	-1	1	-1	0	0	0	0	0	0	4
AT4G34400	1	0	1	0	-1	0	0	0	-1	0	4
AT4G34420	1	0	1	0	-1	0	0	0	-1	0	4
AT4G35630	1	0	1	0	-1	0	0	0	-1	0	4
AT4G36360	1	0	1	0	1	0	0	0	1	0	4
AT4G36470	1	0	1	1	0	-1	0	0	0	0	4
AT4G37180	1	0	1	0	0	0	-1	0	1	0	4
AT4G37250	1	0	1	0	-1	0	0	0	-1	0	4
AT4G37450	1	0	1	0	-1	0	0	0	-1	0	4
AT4G37810	1	0	1	0	-1	0	0	0	-1	0	4
AT4G38210	1	0	1	0	-1	0	0	0	-1	0	4
AT4G38400	1	0	1	0	-1	0	0	0	-1	0	4
AT4G38401	1	0	1	0	-1	0	0	0	-1	0	4
AT4G39010	1	-1	1	-1	0	0	0	0	0	0	4
AT4G39230	1	0	1	0	-1	0	0	0	-1	0	4
AT4G39235	1	0	1	0	-1	0	0	0	-1	0	4
AT4G39510	1	0	1	0	-1	0	-1	0	0	0	4
AT4G39550	1	0	1	0	-1	0	0	0	-1	0	4
AT4G39790	1	0	1	0	-1	0	0	0	-1	0	4
AT4G39860	1	0	1	0	-1	0	0	0	-1	0	4
AT5G01420	1	0	1	0	-1	0	0	0	-1	0	4
AT5G01570	1	0	1	0	-1	0	0	0	-1	0	4
AT5G01630	1	0	1	0	-1	0	0	0	-1	0	4
AT5G01640	1	0	1	0	-1	0	0	0	-1	0	4
AT5G01660	1	0	1	0	-1	0	0	0	-1	0	4
AT5G02430	1	0	1	0	-1	0	0	0	-1	0	4
AT5G03390	1	0	1	0	-1	0	-1	0	0	0	4
AT5G03610	1	-1	1	0	-1	0	0	0	0	0	4
AT5G03668	1	0	1	0	-1	0	-1	0	0	0	4
AT5G03670	1	0	1	0	-1	0	-1	0	0	0	4
AT5G04530	1	0	1	0	-1	0	0	0	-1	0	4
AT5G05330	1	0	1	0	-1	0	0	0	-1	0	4
AT5G05810	1	-1	1	-1	0	0	0	0	0	0	4
AT5G08130	1	-1	1	-1	0	0	0	0	0	0	4
AT5G08640	1	0	1	0	0	1	0	0	0	1	4
AT5G09995	1	-1	1	-1	0	0	0	0	0	0	4
AT5G10310	1	0	1	0	0	0	-1	0	-1	0	4
AT5G11160	1	0	1	0	-1	0	0	0	-1	0	4
AT5G11300	1	0	1	0	-1	0	0	0	-1	0	4
AT5G12080	1	0	1	0	-1	0	0	0	-1	0	4
AT5G13220	1	-1	1	-1	0	0	0	0	0	0	4
AT5G13225	1	0	1	0	-1	0	0	0	-1	0	4
AT5G13290	1	0	1	0	-1	0	0	0	-1	0	4
AT5G13520	1	0	1	0	-1	0	0	0	-1	0	4
AT5G13530	1	0	1	0	-1	0	0	0	-1	0	4
AT5G13840	1	0	1	0	-1	0	0	0	-1	0	4
AT5G13845	1	0	1	0	-1	0	0	0	-1	0	4
AT5G13850	1	0	1	0	-1	0	0	0	-1	0	4
AT5G13930	1	0	1	0	0	1	0	0	0	1	4
AT5G13960	1	0	1	0	-1	0	0	0	-1	0	4
AT5G14230	1	0	1	0	-1	0	0	0	-1	0	4
AT5G15200	1	0	1	0	-1	0	0	0	-1	0	4
AT5G15230	1	0	1	0	-1	0	0	0	-1	0	4
AT5G15510	1	0	1	0	-1	0	0	0	-1	0	4
AT5G15530	1	0	1	0	1	0	0	0	1	0	4
AT5G15760	1	0	1	0	0	0	-1	0	1	0	4
AT5G15770	1	0	1	0	0	0	-1	0	1	0	4
AT5G15780	1	0	1	0	0	0	-1	0	1	0	4
AT5G16850	1	0	1	0	-1	0	0	0	-1	0	4
AT5G16860	1	0	1	0	-1	0	0	0	-1	0	4
AT5G18690	1	-1	1	-1	0	0	0	0	0	0	4
AT5G19020	1	0	1	0	-1	0	0	0	-1	0	4
AT5G19060	1	0	1	1	0	-1	0	0	0	0	4
AT5G19170	1	-1	1	0	0	0	0	0	0	-1	4
AT5G19340	1	0	1	0	1	0	0	0	1	0	4
AT5G20250	1	0	1	0	0	0	-1	0	1	0	4
AT5G20635	1	0	1	0	-1	0	0	0	-1	0	4
AT5G20740	1	-1	1	-1	0	0	0	0	0	0	4
AT5G22140	1	0	1	0	-1	0	0	0	-1	0	4
AT5G22880	1	0	1	0	-1	0	0	0	-1	0	4
AT5G22930	1	0	1	0	-1	0	-1	0	0	0	4
AT5G23400	1	0	1	0	-1	0	0	0	-1	0	4
AT5G23530	1	-1	1	-1	0	0	0	0	0	0	4
AT5G23940	1	-1	1	-1	0	0	0	0	0	0	4
AT5G24390	1	0	1	0	-1	0	0	0	-1	0	4
AT5G25475	1	0	1	0	-1	0	0	0	-1	0	4
AT5G25580	1	0	1	0	-1	0	0	0	-1	0	4
AT5G28290	1	0	1	0	-1	0	0	0	-1	0	4
AT5G35670	1	0	1	0	0	0	-1	0	1	0	4
AT5G37010	1	0	1	0	-1	0	0	0	-1	0	4
AT5G37460	1	-1	1	0	-1	0	0	0	0	0	4
AT5G39220	1	0	1	0	0	0	1	0	-1	0	4
AT5G40030	1	0	1	0	-1	0	0	0	-1	0	4
AT5G41080	1	0	1	0	-1	0	0	0	-1	0	4
AT5G42780	1	-1	1	-1	0	0	0	0	0	0	4
AT5G43020	1	0	1	0	-1	0	0	0	-1	0	4
AT5G43060	1	0	1	0	-1	0	0	0	-1	0	4
AT5G45350	1	0	1	0	-1	0	-1	0	0	0	4
AT5G45960	1	-1	1	-1	0	0	0	0	0	0	4
AT5G47160	1	0	1	0	-1	0	0	0	-1	0	4
AT5G48310	1	0	1	0	-1	0	0	0	-1	0	4
AT5G48450	1	0	1	0	-1	0	0	0	-1	0	4
AT5G48500	1	0	1	0	-1	0	0	0	-1	0	4
AT5G48600	1	0	1	0	-1	0	0	0	-1	0	4
AT5G48650	1	0	1	0	-1	0	0	0	-1	0	4
AT5G50010	1	0	1	0	0	-1	-1	0	0	0	4
AT5G50011	1	0	1	0	0	-1	-1	0	0	0	4
AT5G50012	1	0	1	0	0	-1	-1	0	0	0	4
AT5G50150	1	0	1	-1	-1	0	0	0	0	0	4
AT5G51350	1	0	1	0	-1	0	0	0	-1	0	4
AT5G51850	1	0	1	0	-1	0	-1	0	0	0	4
AT5G52860	1	0	1	0	-1	0	0	0	-1	0	4
AT5G54670	1	0	1	0	-1	0	0	0	-1	0	4
AT5G55340	1	0	1	0	-1	0	0	0	-1	0	4
AT5G55730	1	-1	1	-1	0	0	0	0	0	0	4
AT5G55810	1	0	1	0	-1	0	0	0	-1	0	4
AT5G55820	1	0	1	0	-1	0	0	0	-1	0	4
AT5G56220	1	0	1	0	-1	0	0	0	-1	0	4
AT5G56530	1	0	1	0	-1	0	0	0	-1	0	4
AT5G56580	1	0	1	0	-1	0	0	0	-1	0	4
AT5G56790	1	0	1	0	-1	0	0	0	-1	0	4
AT5G57410	1	0	1	0	-1	0	0	0	-1	0	4
AT5G57790	1	-1	1	-1	0	0	0	0	0	0	4
AT5G58280	1	0	1	0	-1	0	0	0	-1	0	4
AT5G58580	1	0	1	0	-1	0	0	0	-1	0	4
AT5G59220	1	-1	1	-1	0	0	0	0	0	0	4
AT5G59870	1	0	1	0	-1	0	0	0	-1	0	4
AT5G60800	1	0	1	0	-1	0	0	0	-1	0	4
AT5G60930	1	0	1	0	-1	0	0	0	-1	0	4
AT5G60940	1	0	1	0	-1	0	0	0	-1	0	4
AT5G60990	1	0	1	0	-1	0	0	0	-1	0	4
AT5G61000	1	0	1	0	-1	0	0	0	-1	0	4
AT5G61030	1	0	1	0	-1	0	0	0	-1	0	4
AT5G61020	1	0	1	0	-1	0	0	0	-1	0	4
AT5G62500	1	0	1	0	-1	0	0	0	-1	0	4
AT5G62960	1	0	1	0	-1	0	0	0	-1	0	4
AT5G63140	1	-1	1	0	0	0	1	0	0	0	4
AT5G63550	1	0	1	0	-1	0	0	0	-1	0	4
AT5G64710	1	0	1	0	-1	0	0	0	-1	0	4
AT5G64980	1	0	1	0	-1	0	0	0	-1	0	4
AT5G65020	1	0	1	0	-1	0	0	0	-1	0	4
AT5G65420	1	0	1	0	-1	0	0	0	-1	0	4
AT5G66750	1	0	1	0	-1	0	0	0	-1	0	4
AT5G67110	1	0	1	0	-1	0	0	0	-1	0	4
AT5G67260	1	0	1	0	-1	0	0	0	-1	0	4
AT5G67460	1	0	1	0	-1	0	0	0	-1	0	4
AT1G02190	1	-1	1	-1	0	0	0	0	0	0	4
AT1G03457	1	0	1	0	-1	0	0	0	-1	0	4
AT1G20720	1	0	1	0	-1	0	0	0	-1	0	4
AT1G22600	1	0	1	0	-1	0	0	0	-1	0	4
AT1G31760	1	0	1	0	-1	0	0	0	-1	0	4
AT1G34355	1	0	1	0	-1	0	0	0	-1	0	4
AT1G49490	1	0	1	0	-1	0	0	0	-1	0	4
AT1G49952	1	0	1	0	-1	0	0	0	-1	0	4
AT1G51460	1	-1	1	-1	0	0	0	0	0	0	4
AT1G61450	1	0	1	0	-1	0	0	0	-1	0	4
AT1G62480	1	0	1	0	-1	0	-1	0	0	0	4
AT1G65730	1	-1	1	-1	0	0	0	0	0	0	4
AT1G74150	1	0	1	0	-1	0	0	0	-1	0	4
AT1G80200	1	0	1	0	-1	0	0	0	-1	0	4
AT2G01610	1	-1	1	-1	0	0	0	0	0	0	4
AT2G02350	1	0	1	0	-1	0	0	0	-1	0	4
AT2G16760	1	0	1	0	0	1	0	0	0	1	4
AT2G18100	1	0	1	0	-1	0	0	0	-1	0	4
AT2G34300	1	0	1	0	-1	0	0	0	-1	0	4
AT2G36660	1	-1	1	-1	0	0	0	0	0	0	4
AT2G37390	1	0	1	0	0	-1	0	0	0	-1	4
AT2G43840	1	0	1	0	1	0	1	0	0	0	4
AT2G44810	1	-1	1	-1	0	0	0	0	0	0	4
AT3G04960	1	0	1	0	1	0	0	0	1	0	4
AT3G11000	1	0	1	0	0	0	1	0	-1	0	4
AT3G12170	1	0	1	0	-1	0	0	0	-1	0	4
AT3G13650	1	0	1	-1	0	0	0	0	1	0	4
AT3G18860	1	0	1	0	1	0	0	0	1	0	4
AT3G23450	1	0	1	0	1	0	0	0	1	0	4
AT3G25950	1	-1	1	-1	0	0	0	0	0	0	4
AT3G25970	1	0	1	0	-1	0	0	0	-1	0	4
AT3G45095	1	0	1	0	-1	0	0	0	-1	0	4
AT3G58865	1	0	1	0	0	1	0	0	0	1	4
AT4G05360	1	0	1	1	0	-1	0	0	0	0	4
AT4G08910	1	-1	1	-1	0	0	0	0	0	0	4
AT4G17800	1	0	1	0	-1	0	0	0	-1	0	4
AT4G20730	1	-1	1	-1	0	0	0	0	0	0	4
AT4G24260	1	0	1	1	0	-1	0	0	0	0	4
AT4G26055	1	0	1	0	-1	0	0	0	-1	0	4
AT4G27070	1	-1	1	-1	0	0	0	0	0	0	4
AT4G33150	1	0	1	0	1	0	0	0	1	0	4
AT4G38300	1	0	1	0	-1	0	0	0	-1	0	4
AT4G38310	1	0	1	0	-1	0	0	0	-1	0	4
AT4G38320	1	0	1	0	-1	0	0	0	-1	0	4
AT5G01075	1	-1	1	-1	0	0	0	0	0	0	4
AT5G02750	1	1	1	1	0	0	0	0	0	0	4
AT5G02890	1	0	1	0	-1	0	0	0	-1	0	4
AT5G13400	1	0	1	0	1	0	0	0	1	0	4
AT5G18460	1	-1	1	-1	0	0	0	0	0	0	4
AT5G23420	1	0	1	0	-1	0	0	0	-1	0	4
AT5G24780	1	-1	1	-1	0	0	0	0	0	0	4
AT5G33300	1	0	1	0	-1	0	0	0	-1	0	4
AT5G40940	1	0	1	0	-1	0	0	0	-1	0	4
AT5G42330	1	0	1	0	-1	0	0	0	-1	0	4
AT5G47720	1	0	1	0	1	0	0	0	1	0	4
AT5G54510	1	0	1	0	-1	0	-1	0	0	0	4
AT5G58500	1	0	1	0	-1	0	0	0	-1	0	4
AT5G66460	1	0	1	0	1	0	0	0	1	0	4
AT4G00900	1	0	1	0	-1	0	0	0	both	0	4
AT5G07400	1	0	1	0	both	0	0	0	both	0	4
AT5G66600	1	0	1	0	both	0	0	0	1	0	4
AT1G02145	1	0	1	0	0	0	0	0	-1	0	3
AT1G04020	1	0	1	0	0	0	0	0	-1	0	3
AT1G04010	1	0	1	0	0	0	0	0	-1	0	3
AT1G04730	1	0	1	0	-1	0	0	0	0	0	3
AT1G04840	1	0	1	0	-1	0	0	0	0	0	3
AT1G05160	1	0	1	0	-1	0	0	0	0	0	3
AT1G05640	1	0	1	0	0	0	0	0	-1	0	3
AT1G06450	1	0	1	0	0	0	0	0	-1	0	3
AT1G06660	1	0	1	0	0	0	0	0	-1	0	3
AT1G07370	1	0	1	0	-1	0	0	0	0	0	3
AT1G07360	1	0	1	0	-1	0	0	0	0	0	3
AT1G07570	1	0	1	0	1	0	0	0	0	0	3
AT1G10780	1	0	1	0	-1	0	0	0	0	0	3
AT1G11100	1	0	1	0	-1	0	0	0	0	0	3
AT1G11160	1	0	1	0	-1	0	0	0	0	0	3
AT1G12930	1	0	1	0	0	0	0	0	-1	0	3
AT1G13030	1	0	1	0	-1	0	0	0	0	0	3
AT1G13040	1	0	1	0	-1	0	0	0	0	0	3
AT1G13740	1	0	1	0	-1	0	0	0	0	0	3
AT1G14430	1	0	1	0	-1	0	0	0	0	0	3
AT1G14900	1	0	1	0	-1	0	0	0	0	0	3
AT1G14970	1	0	1	0	-1	0	0	0	0	0	3
AT1G16520	1	-1	1	0	0	0	0	0	0	0	3
AT1G17920	1	0	1	0	-1	0	0	0	0	0	3
AT1G18040	1	0	1	1	0	0	0	0	0	0	3
AT1G18650	1	0	1	0	-1	0	0	0	0	0	3
AT1G18660	1	0	1	0	-1	0	0	0	0	0	3
AT1G18840	1	0	1	0	-1	0	0	0	0	0	3
AT1G20610	1	0	1	0	-1	0	0	0	0	0	3
AT1G20980	1	0	1	0	0	0	0	0	1	0	3
AT1G21090	1	0	1	0	-1	0	0	0	0	0	3
AT1G21150	1	0	1	0	-1	0	0	0	0	0	3
AT1G21160	1	0	1	0	-1	0	0	0	0	0	3
AT1G22275	1	0	1	0	0	0	0	0	-1	0	3
AT1G23205	1	0	1	0	0	0	-1	0	0	0	3
AT1G26100	1	0	1	0	-1	0	0	0	0	0	3
AT1G26840	1	0	1	0	-1	0	0	0	0	0	3
AT1G27390	1	0	1	0	-1	0	0	0	0	0	3
AT1G27400	1	0	1	0	-1	0	0	0	0	0	3
AT1G28060	1	0	1	0	-1	0	0	0	0	0	3
AT1G28400	1	0	1	0	0	0	0	0	0	-1	3
AT1G29630	1	0	1	0	-1	0	0	0	0	0	3
AT1G32415	1	0	1	0	-1	0	0	0	0	0	3
AT1G35530	1	0	1	0	-1	0	0	0	0	0	3
AT1G44760	1	0	1	0	-1	0	0	0	0	0	3
AT1G45130	1	0	1	0	-1	0	0	0	0	0	3
AT1G47900	1	0	1	0	-1	0	0	0	0	0	3
AT1G48100	1	0	1	-1	0	0	0	0	0	0	3
AT1G48480	1	0	1	0	0	0	0	0	1	0	3
AT1G49580	1	0	1	0	0	0	0	0	-1	0	3
AT1G49840	1	0	1	0	-1	0	0	0	0	0	3
AT1G50110	1	0	1	0	-1	0	0	0	0	0	3
AT1G50240	1	0	1	0	-1	0	0	0	0	0	3
AT1G50490	1	0	1	0	-1	0	0	0	0	0	3
AT1G51130	1	0	1	0	-1	0	0	0	0	0	3
AT1G51538	1	0	1	0	-1	0	0	0	0	0	3
AT1G53645	1	0	1	1	0	0	0	0	0	0	3
AT1G54510	1	0	1	0	-1	0	0	0	0	0	3
AT1G54680	1	0	1	0	-1	0	0	0	0	0	3
AT1G54690	1	0	1	0	-1	0	0	0	0	0	3
AT1G56110	1	0	1	0	-1	0	0	0	0	0	3
AT1G60860	1	0	1	0	-1	0	0	0	0	0	3
AT1G64100	1	0	1	0	-1	0	0	0	0	0	3
AT1G64760	1	0	1	0	0	0	0	0	1	0	3
AT1G65900	1	0	1	0	-1	0	0	0	0	0	3
AT1G66620	1	0	1	0	0	0	0	0	-1	0	3
AT1G67035	1	0	1	0	-1	0	0	0	0	0	3
AT1G67320	1	0	1	0	-1	0	0	0	0	0	3
AT1G67630	1	0	1	0	-1	0	0	0	0	0	3
AT1G68872	1	0	1	0	-1	0	0	0	0	0	3
AT1G68945	1	0	1	0	-1	0	0	0	0	0	3
AT1G69700	1	0	1	0	-1	0	0	0	0	0	3
AT1G69770	1	0	1	0	-1	0	0	0	0	0	3
AT1G70480	1	0	1	0	0	0	0	0	-1	0	3
AT1G70710	1	0	1	0	0	0	0	0	-1	0	3
AT1G72730	1	0	1	0	-1	0	0	0	0	0	3
AT1G76540	1	0	1	0	-1	0	0	0	0	0	3
AT1G76550	1	0	1	0	0	0	0	0	-1	0	3
AT1G77060	1	0	1	0	0	0	0	0	-1	0	3
AT1G77940	1	0	1	0	0	0	0	0	1	0	3
AT1G78430	1	0	1	0	-1	0	0	0	0	0	3
AT1G78650	1	0	1	0	0	0	0	0	-1	0	3
AT1G80620	1	0	1	0	-1	0	0	0	0	0	3
AT1G80690	1	0	1	0	0	0	0	0	-1	0	3
AT1G80710	1	0	1	0	-1	0	0	0	0	0	3
AT1G80720	1	0	1	0	-1	0	0	0	0	0	3
AT2G05760	1	0	1	0	-1	0	0	0	0	0	3
AT2G07170	1	0	1	0	-1	0	0	0	0	0	3
AT2G12400	1	0	1	0	-1	0	0	0	0	0	3
AT2G13610	1	0	1	0	0	0	1	0	0	0	3
AT2G21790	1	0	1	0	-1	0	0	0	0	0	3
AT2G22070	1	0	1	0	-1	0	0	0	0	0	3
AT2G22240	1	0	1	0	0	0	1	0	0	0	3
AT2G22250	1	0	1	0	0	0	0	0	-1	0	3
AT2G22260	1	0	1	0	0	0	0	0	-1	0	3
AT2G22610	1	0	1	0	-1	0	0	0	0	0	3
AT2G22660	1	0	1	0	0	0	0	0	-1	0	3
AT2G23950	1	0	1	0	-1	0	0	0	0	0	3
AT2G25270	1	0	1	0	0	0	0	0	-1	0	3
AT2G25690	1	0	1	0	-1	0	0	0	0	0	3
AT2G26250	1	0	1	0	0	0	1	0	0	0	3
AT2G26330	1	0	1	0	-1	0	0	0	0	0	3
AT2G27385	1	0	1	0	0	0	0	0	-1	0	3
AT2G28130	1	0	1	0	-1	0	0	0	0	0	3
AT2G28350	1	0	1	0	0	0	0	0	-1	0	3
AT2G28490	1	0	1	0	0	0	0	0	0	-1	3
AT2G29570	1	0	1	0	-1	0	0	0	0	0	3
AT2G29580	1	0	1	0	-1	0	0	0	0	0	3
AT2G30480	1	0	1	1	0	0	0	0	0	0	3
AT2G30505	1	0	1	0	-1	0	0	0	0	0	3
AT2G32590	1	0	1	0	-1	0	0	0	0	0	3
AT2G33400	1	0	1	0	-1	0	0	0	0	0	3
AT2G33620	1	0	1	0	-1	0	0	0	0	0	3
AT2G34150	1	0	1	1	0	0	0	0	0	0	3
AT2G34680	1	0	1	0	-1	0	0	0	0	0	3
AT2G35190	1	0	1	0	-1	0	0	0	0	0	3
AT2G36910	1	0	1	0	0	0	0	0	-1	0	3
AT2G37300	1	0	1	0	-1	0	0	0	0	0	3
AT2G37380	1	0	1	0	-1	0	0	0	0	0	3
AT2G37400	1	0	1	0	-1	0	0	0	0	0	3
AT2G37410	1	0	1	0	-1	0	0	0	0	0	3
AT2G37420	1	0	1	0	-1	0	0	0	0	0	3
AT2G38430	1	0	1	0	-1	0	0	0	0	0	3
AT2G38440	1	0	1	0	-1	0	0	0	0	0	3
AT2G38620	1	0	1	0	-1	0	0	0	0	0	3
AT2G39140	1	0	1	0	0	0	-1	0	0	0	3
AT2G40085	1	0	1	0	0	0	0	0	-1	0	3
AT2G40550	1	0	1	0	-1	0	0	0	0	0	3
AT2G40590	1	0	1	0	-1	0	0	0	0	0	3
AT2G41160	1	0	1	0	-1	0	0	0	0	0	3
AT2G41170	1	0	1	0	-1	0	0	0	0	0	3
AT2G42320	1	0	1	0	0	0	-1	0	0	0	3
AT2G43040	1	0	1	0	-1	0	0	0	0	0	3
AT2G43375	1	0	1	0	-1	0	0	0	0	0	3
AT2G43680	1	0	1	0	0	0	0	0	-1	0	3
AT2G45100	1	0	1	0	-1	0	0	0	0	0	3
AT2G46000	1	0	1	0	0	0	0	0	-1	0	3
AT2G46455	1	0	1	0	-1	0	0	0	0	0	3
AT2G46780	1	0	1	0	0	0	1	0	0	0	3
AT3G01410	1	0	1	0	0	0	0	0	-1	0	3
AT3G01580	1	0	1	0	-1	0	0	0	0	0	3
AT3G01810	1	0	1	0	0	0	0	0	-1	0	3
AT3G02210	1	0	1	0	-1	0	0	0	0	0	3
AT3G02820	1	0	1	0	-1	0	0	0	0	0	3
AT3G04840	1	0	1	0	-1	0	0	0	0	0	3
AT3G05470	1	0	1	0	-1	0	0	0	0	0	3
AT3G09080	1	0	1	0	-1	0	0	0	0	0	3
AT3G09085	1	0	1	0	-1	0	0	0	0	0	3
AT3G09090	1	0	1	0	-1	0	0	0	0	0	3
AT3G09780	1	0	1	0	0	0	-1	0	0	0	3
AT3G11710	1	0	1	0	-1	0	0	0	0	0	3
AT3G12100	1	0	1	0	0	0	0	0	1	0	3
AT3G12110	1	0	1	0	0	0	0	0	1	0	3
AT3G12700	1	0	1	0	-1	0	0	0	0	0	3
AT3G12770	1	0	1	0	-1	0	0	0	0	0	3
AT3G13600	1	0	1	0	-1	0	0	0	0	0	3
AT3G14890	1	0	1	0	0	0	0	0	-1	0	3
AT3G16180	1	0	1	0	-1	0	0	0	0	0	3
AT3G17160	1	0	1	0	-1	0	0	0	0	0	3
AT3G17170	1	0	1	0	-1	0	0	0	0	0	3
AT3G18600	1	0	1	0	-1	0	0	0	0	0	3
AT3G18750	1	0	1	0	-1	0	0	0	0	0	3
AT3G20260	1	0	1	0	0	0	0	0	-1	0	3
AT3G23730	1	0	1	0	0	0	0	0	1	0	3
AT3G23805	1	0	1	0	0	0	0	0	1	0	3
AT3G24630	1	0	1	0	-1	0	0	0	0	0	3
AT3G26690	1	0	1	0	0	0	0	0	-1	0	3
AT3G28660	1	0	1	0	-1	0	0	0	0	0	3
AT3G44050	1	0	1	0	0	0	0	0	-1	0	3
AT3G44940	1	0	1	0	-1	0	0	0	0	0	3
AT3G46940	1	0	1	0	-1	0	0	0	0	0	3
AT3G46950	1	0	1	0	-1	0	0	0	0	0	3
AT3G47450	1	0	1	0	-1	0	0	0	0	0	3
AT3G48430	1	0	1	0	0	0	0	0	-1	0	3
AT3G48540	1	0	1	0	-1	0	0	0	0	0	3
AT3G48610	1	0	1	0	0	-1	0	0	0	0	3
AT3G49160	1	0	1	0	0	0	0	0	-1	0	3
AT3G49400	1	0	1	0	-1	0	0	0	0	0	3
AT3G49410	1	0	1	0	-1	0	0	0	0	0	3
AT3G49750	1	0	1	0	-1	0	0	0	0	0	3
AT3G49810	1	0	1	0	0	0	0	0	-1	0	3
AT3G51375	1	0	1	0	-1	0	0	0	0	0	3
AT3G51380	1	0	1	0	-1	0	0	0	0	0	3
AT3G53680	1	0	1	0	-1	0	0	0	0	0	3
AT3G53900	1	0	1	0	-1	0	0	0	0	0	3
AT3G54650	1	0	1	0	-1	0	0	0	0	0	3
AT3G54720	1	0	1	0	-1	0	0	0	0	0	3
AT3G55110	1	0	1	0	0	-1	0	0	0	0	3
AT3G55360	1	0	1	0	0	0	0	0	1	0	3
AT3G55490	1	0	1	0	-1	0	0	0	0	0	3
AT3G56340	1	0	1	0	-1	0	0	0	0	0	3
AT3G56860	1	0	1	0	-1	0	0	0	0	0	3
AT3G56870	1	0	1	0	-1	0	0	0	0	0	3
AT3G57860	1	0	1	0	-1	0	0	0	0	0	3
AT3G57880	1	0	1	0	0	0	0	0	-1	0	3
AT3G58850	1	0	1	0	-1	0	0	0	0	0	3
AT3G59540	1	0	1	0	-1	0	0	0	0	0	3
AT3G59550	1	0	1	0	-1	0	0	0	0	0	3
AT3G60660	1	0	1	0	-1	0	0	0	0	0	3
AT3G61310	1	0	1	0	0	0	0	0	-1	0	3
AT3G61490	1	0	1	0	0	0	0	0	0	-1	3
AT3G61610	1	0	1	0	-1	0	0	0	0	0	3
AT3G62430	1	0	1	0	-1	0	0	0	0	0	3
AT3G63300	1	0	1	0	-1	0	0	0	0	0	3
AT4G00380	1	0	1	0	0	0	0	0	0	-1	3
AT4G01575	1	0	1	0	-1	0	0	0	0	0	3
AT4G02070	1	0	1	0	-1	0	0	0	0	0	3
AT4G02100	1	0	1	0	-1	0	0	0	0	0	3
AT4G02150	1	0	1	0	-1	0	0	0	0	0	3
AT4G03340	1	0	1	0	-1	0	0	0	0	0	3
AT4G09510	1	0	1	0	-1	0	0	0	0	0	3
AT4G12880	1	0	1	0	0	0	0	0	0	-1	3
AT4G13120	1	0	1	0	-1	0	0	0	0	0	3
AT4G14050	1	0	1	0	-1	0	0	0	0	0	3
AT4G14290	1	0	1	0	-1	0	0	0	0	0	3
AT4G14770	1	0	1	0	-1	0	0	0	0	0	3
AT4G14970	1	0	1	0	-1	0	0	0	0	0	3
AT4G18020	1	0	1	0	-1	0	0	0	0	0	3
AT4G18380	1	0	1	0	0	0	0	0	1	0	3
AT4G20320	1	0	1	0	0	0	0	0	-1	0	3
AT4G22010	1	0	1	0	0	0	0	0	1	0	3
AT4G22120	1	0	1	0	-1	0	0	0	0	0	3
AT4G22130	1	0	1	0	-1	0	0	0	0	0	3
AT4G24090	1	0	1	0	0	0	0	0	-1	0	3
AT4G24780	1	0	1	0	-1	0	0	0	0	0	3
AT4G25760	1	0	1	0	0	0	-1	0	0	0	3
AT4G26960	1	0	1	0	-1	0	0	0	0	0	3
AT4G26965	1	0	1	0	-1	0	0	0	0	0	3
AT4G28310	1	0	1	0	0	0	0	0	-1	0	3
AT4G28320	1	0	1	0	0	0	0	0	-1	0	3
AT4G29080	1	0	1	0	-1	0	0	0	0	0	3
AT4G29720	1	0	1	0	-1	0	0	0	0	0	3
AT4G31280	1	0	1	0	-1	0	0	0	0	0	3
AT4G31290	1	0	1	0	-1	0	0	0	0	0	3
AT4G31400	1	0	1	0	0	0	0	0	-1	0	3
AT4G31650	1	0	1	0	-1	0	0	0	0	0	3
AT4G34260	1	0	1	0	-1	0	0	0	0	0	3
AT4G34360	1	0	1	0	-1	0	0	0	0	0	3
AT4G34710	1	0	1	0	0	0	-1	0	0	0	3
AT4G35840	1	0	1	0	-1	0	0	0	0	0	3
AT4G36910	1	0	1	0	0	0	1	0	0	0	3
AT4G37430	1	0	1	0	-1	0	0	0	0	0	3
AT4G37432	1	0	1	0	-1	0	0	0	0	0	3
AT4G37630	1	0	1	0	-1	0	0	0	0	0	3
AT4G38480	1	0	1	0	-1	0	0	0	0	0	3
AT4G38660	1	0	1	0	-1	0	0	0	0	0	3
AT4G39630	1	0	1	0	-1	0	0	0	0	0	3
AT5G01890	1	0	1	0	-1	0	0	0	0	0	3
AT5G01910	1	0	1	0	-1	0	0	0	0	0	3
AT5G01920	1	0	1	0	-1	0	0	0	0	0	3
AT5G02520	1	0	1	0	-1	0	0	0	0	0	3
AT5G02550	1	0	1	0	0	0	0	0	-1	0	3
AT5G03680	1	-1	1	0	0	0	0	0	0	0	3
AT5G03870	1	0	1	0	-1	0	0	0	0	0	3
AT5G05940	1	0	1	0	-1	0	0	0	0	0	3
AT5G07280	1	0	1	0	0	0	0	0	-1	0	3
AT5G08000	1	0	1	0	0	0	-1	0	0	0	3
AT5G10320	1	0	1	0	-1	0	0	0	0	0	3
AT5G11870	1	0	1	0	-1	0	0	0	0	0	3
AT5G15070	1	0	1	0	0	0	0	0	-1	0	3
AT5G16250	1	0	1	0	0	0	0	0	-1	0	3
AT5G16260	1	0	1	0	0	0	0	0	-1	0	3
AT5G16690	1	0	1	0	-1	0	0	0	0	0	3
AT5G17150	1	0	1	0	-1	0	0	0	0	0	3
AT5G17160	1	0	1	0	-1	0	0	0	0	0	3
AT5G18670	1	0	1	0	0	0	-1	0	0	0	3
AT5G20270	1	-1	1	0	0	0	0	0	0	0	3
AT5G20290	1	0	1	0	-1	0	0	0	0	0	3
AT5G22650	1	0	1	0	-1	0	0	0	0	0	3
AT5G22740	1	0	1	0	0	0	0	0	1	0	3
AT5G24330	1	0	1	0	-1	0	0	0	0	0	3
AT5G24340	1	0	1	0	-1	0	0	0	0	0	3
AT5G37470	1	-1	1	0	0	0	0	0	0	0	3
AT5G38300	1	0	1	0	-1	0	0	0	0	0	3
AT5G40405	1	0	1	0	-1	0	0	0	0	0	3
AT5G41120	1	0	1	0	-1	0	0	0	0	0	3
AT5G41650	1	0	1	-1	0	0	0	0	0	0	3
AT5G44635	1	0	1	0	-1	0	0	0	0	0	3
AT5G51100	1	0	1	0	0	0	0	0	-1	0	3
AT5G51180	1	0	1	0	0	0	-1	0	0	0	3
AT5G51560	1	0	1	0	-1	0	0	0	0	0	3
AT5G52980	1	0	1	0	0	0	0	0	-1	0	3
AT5G52990	1	0	1	0	0	0	0	0	-1	0	3
AT5G55090	1	0	1	0	0	0	1	0	0	0	3
AT5G55120	1	0	1	0	-1	0	0	0	0	0	3
AT5G56460	1	0	1	0	-1	0	0	0	0	0	3
AT5G57800	1	0	1	0	-1	0	0	0	0	0	3
AT5G59010	1	0	1	0	-1	0	0	0	0	0	3
AT5G59240	1	0	1	0	-1	0	0	0	0	0	3
AT5G59250	1	0	1	0	-1	0	0	0	0	0	3
AT5G60390	1	0	1	0	-1	0	0	0	0	0	3
AT5G60670	1	0	1	0	-1	0	0	0	0	0	3
AT5G60690	1	0	1	0	-1	0	0	0	0	0	3
AT5G61980	1	0	1	0	-1	0	0	0	0	0	3
AT5G62580	1	0	1	0	0	0	0	0	-1	0	3
AT5G62710	1	0	1	0	-1	0	0	0	0	0	3
AT5G64080	1	0	1	0	0	0	0	0	-1	0	3
AT5G64340	1	0	1	0	-1	0	0	0	0	0	3
AT5G64341	1	0	1	0	-1	0	0	0	0	0	3
AT5G64342	1	0	1	0	-1	0	0	0	0	0	3
AT5G64343	1	0	1	0	-1	0	0	0	0	0	3
AT5G65640	1	0	1	0	-1	0	0	0	0	0	3
AT5G65940	1	0	1	0	-1	0	0	0	0	0	3
AT1G09390	1	0	1	0	0	0	-1	0	0	0	3
AT1G17200	1	-1	1	0	0	0	0	0	0	0	3
AT1G27410	1	0	1	0	-1	0	0	0	0	0	3
AT1G49430	1	-1	1	0	0	0	0	0	0	0	3
AT1G49870	1	0	1	0	0	0	0	0	-1	0	3
AT1G53060	1	0	1	0	0	0	0	0	1	0	3
AT1G53700	1	0	1	0	0	0	0	0	-1	0	3
AT1G63330	1	0	1	0	-1	0	0	0	0	0	3
AT1G66040	1	0	1	1	0	0	0	0	0	0	3
AT1G73210	1	0	1	0	-1	0	0	0	0	0	3
AT2G02061	1	0	1	0	-1	0	0	0	0	0	3
AT2G27610	1	0	1	0	-1	0	0	0	0	0	3
AT2G30600	1	0	1	0	0	0	0	0	1	0	3
AT2G35150	1	0	1	0	0	0	0	0	1	0	3
AT2G39180	1	0	1	1	0	0	0	0	0	0	3
AT3G02930	1	0	1	0	-1	0	0	0	0	0	3
AT3G05790	1	0	1	0	-1	0	0	0	0	0	3
AT3G08570	1	0	1	0	-1	0	0	0	0	0	3
AT3G08820	1	0	1	0	-1	0	0	0	0	0	3
AT3G10000	1	0	1	0	0	1	0	0	0	0	3
AT3G14950	1	0	1	0	0	0	1	0	0	0	3
AT3G22090	1	0	1	0	0	0	0	0	1	0	3
AT3G22100	1	0	1	0	0	0	0	0	1	0	3
AT3G48410	1	0	1	0	0	0	0	0	-1	0	3
AT3G51930	1	0	1	0	0	0	0	0	-1	0	3
AT3G54750	1	0	1	0	0	0	0	0	-1	0	3
AT4G14010	1	0	1	0	0	0	0	0	1	0	3
AT4G17280	1	0	1	0	0	0	0	0	-1	0	3
AT4G19191	1	0	1	0	-1	0	0	0	0	0	3
AT4G27730	1	0	1	0	0	0	-1	0	0	0	3
AT4G29020	1	0	1	0	0	0	1	0	0	0	3
AT4G34940	1	0	1	0	0	0	0	0	1	0	3
AT4G37420	1	-1	1	0	0	0	0	0	0	0	3
AT4G37900	1	0	1	0	0	0	-1	0	0	0	3
AT5G03010	1	0	1	1	0	0	0	0	0	0	3
AT5G03790	1	0	1	-1	0	0	0	0	0	0	3
AT5G06270	1	0	1	1	0	0	0	0	0	0	3
AT5G23908	1	0	1	0	-1	0	0	0	0	0	3
AT5G23910	1	0	1	0	-1	0	0	0	0	0	3
AT5G36740	1	0	1	0	-1	0	0	0	0	0	3
AT5G45460	1	0	1	0	-1	0	0	0	0	0	3
AT5G46280	1	0	1	0	-1	0	0	0	0	0	3
AT5G48485	1	0	1	0	0	0	0	0	-1	0	3
AT5G50890	1	0	1	0	-1	0	0	0	0	0	3
AT5G52020	1	0	1	-1	0	0	0	0	0	0	3
AT5G53090	1	0	1	0	0	0	0	0	-1	0	3
AT5G61950	1	0	1	0	-1	0	0	0	0	0	3
AT5G65590	1	0	1	-1	0	0	0	0	0	0	3
AT1G01110	1	0	1	0	0	0	0	0	0	0	2
AT1G01225	1	0	1	0	0	0	0	0	0	0	2
AT1G01230	1	0	1	0	0	0	0	0	0	0	2
AT1G01300	1	0	1	0	0	0	0	0	0	0	2
AT1G01370	1	0	1	0	0	0	0	0	0	0	2
AT1G01600	1	0	1	0	0	0	0	0	0	0	2
AT1G01840	1	0	1	0	0	0	0	0	0	0	2
AT1G01860	1	0	1	0	0	0	0	0	0	0	2
AT1G01880	1	0	1	0	0	0	0	0	0	0	2
AT1G02020	1	0	1	0	0	0	0	0	0	0	2
AT1G02150	1	0	1	0	0	0	0	0	0	0	2
AT1G02180	1	0	1	0	0	0	0	0	0	0	2
AT1G02380	1	0	1	0	0	0	0	0	0	0	2
AT1G02720	1	0	1	0	0	0	0	0	0	0	2
AT1G02780	1	0	1	0	0	0	0	0	0	0	2
AT1G03090	1	0	1	0	0	0	0	0	0	0	2
AT1G03260	1	0	1	0	0	0	0	0	0	0	2
AT1G03270	1	0	1	0	0	0	0	0	0	0	2
AT1G03470	1	0	1	0	0	0	0	0	0	0	2
AT1G03510	1	0	1	0	0	0	0	0	0	0	2
AT1G03530	1	0	1	0	0	0	0	0	0	0	2
AT1G03540	1	0	1	0	0	0	0	0	0	0	2
AT1G03590	1	0	1	0	0	0	0	0	0	0	2
AT1G03830	1	0	1	0	0	0	0	0	0	0	2
AT1G04120	1	0	1	0	0	0	0	0	0	0	2
AT1G04680	1	0	1	0	0	0	0	0	0	0	2
AT1G04760	1	0	1	0	0	0	0	0	0	0	2
AT1G04820	1	0	1	0	0	0	0	0	0	0	2
AT1G05205	1	0	1	0	0	0	0	0	0	0	2
AT1G05210	1	0	1	0	0	0	0	0	0	0	2
AT1G05440	1	0	1	0	0	0	0	0	0	0	2
AT1G05590	1	0	1	0	0	0	0	0	0	0	2
AT1G06550	1	0	1	0	0	0	0	0	0	0	2
AT1G06560	1	0	1	0	0	0	0	0	0	0	2
AT1G06750	1	0	1	0	0	0	0	0	0	0	2
AT1G06760	1	0	1	0	0	0	0	0	0	0	2
AT1G06850	1	0	1	0	0	0	0	0	0	0	2
AT1G07390	1	0	1	0	0	0	0	0	0	0	2
AT1G07400	1	0	1	0	0	0	0	0	0	0	2
AT1G07410	1	0	1	0	0	0	0	0	0	0	2
AT1G07670	1	0	1	0	0	0	0	0	0	0	2
AT1G07780	1	0	1	0	0	0	0	0	0	0	2
AT1G07790	1	0	1	0	0	0	0	0	0	0	2
AT1G07795	1	0	1	0	0	0	0	0	0	0	2
AT1G08250	1	0	1	0	0	0	0	0	0	0	2
AT1G08260	1	0	1	0	0	0	0	0	0	0	2
AT1G09190	1	0	1	0	0	0	0	0	0	0	2
AT1G09590	1	0	1	0	0	0	0	0	0	0	2
AT1G09600	1	0	1	0	0	0	0	0	0	0	2
AT1G10640	1	0	1	0	0	0	0	0	0	0	2
AT1G10850	1	0	1	0	0	0	0	0	0	0	2
AT1G10870	1	0	1	0	0	0	0	0	0	0	2
AT1G11820	1	0	1	0	0	0	0	0	0	0	2
AT1G11940	1	0	1	0	0	0	0	0	0	0	2
AT1G12270	1	0	1	0	0	0	0	0	0	0	2
AT1G12330	1	0	1	0	0	0	0	0	0	0	2
AT1G12380	1	0	1	0	0	0	0	0	0	0	2
AT1G12440	1	0	1	0	0	0	0	0	0	0	2
AT1G12460	1	0	1	0	0	0	0	0	0	0	2
AT1G13170	1	0	1	0	0	0	0	0	0	0	2
AT1G13180	1	0	1	0	0	0	0	0	0	0	2
AT1G14180	1	0	1	0	0	0	0	0	0	0	2
AT1G14460	1	0	1	0	0	0	0	0	0	0	2
AT1G14710	1	0	1	0	0	0	0	0	0	0	2
AT1G14890	1	0	1	0	0	0	0	0	0	0	2
AT1G15110	1	0	1	0	0	0	0	0	0	0	2
AT1G15520	1	0	1	0	0	0	0	0	0	0	2
AT1G15570	1	0	1	0	0	0	0	0	0	0	2
AT1G15700	1	0	1	0	0	0	0	0	0	0	2
AT1G15710	1	0	1	0	0	0	0	0	0	0	2
AT1G15720	1	0	1	0	0	0	0	0	0	0	2
AT1G15800	1	0	1	0	0	0	0	0	0	0	2
AT1G15810	1	0	1	0	0	0	0	0	0	0	2
AT1G15820	1	0	1	0	0	0	0	0	0	0	2
AT1G15825	1	0	1	0	0	0	0	0	0	0	2
AT1G15830	1	0	1	0	0	0	0	0	0	0	2
AT1G16000	1	0	1	0	0	0	0	0	0	0	2
AT1G16445	1	0	1	0	0	0	0	0	0	0	2
AT1G17140	1	0	1	0	0	0	0	0	0	0	2
AT1G17235	1	0	1	0	0	0	0	0	0	0	2
AT1G17510	1	0	1	0	0	0	0	0	0	0	2
AT1G17560	1	0	1	0	0	0	0	0	0	0	2
AT1G17580	1	0	1	0	0	0	0	0	0	0	2
AT1G17590	1	0	1	0	0	0	0	0	0	0	2
AT1G17750	1	0	1	0	0	0	0	0	0	0	2
AT1G18170	1	0	1	0	0	0	0	0	0	0	2
AT1G18180	1	0	1	0	0	0	0	0	0	0	2
AT1G18320	1	0	1	0	0	0	0	0	0	0	2
AT1G18330	1	0	1	0	0	0	0	0	0	0	2
AT1G18415	1	0	1	0	0	0	0	0	0	0	2
AT1G18420	1	0	1	0	0	0	0	0	0	0	2
AT1G18430	1	0	1	0	0	0	0	0	0	0	2
AT1G18440	1	0	1	0	0	0	0	0	0	0	2
AT1G19840	1	0	1	0	0	0	0	0	0	0	2
AT1G19970	1	0	1	0	0	0	0	0	0	0	2
AT1G19980	1	0	1	0	0	0	0	0	0	0	2
AT1G19990	1	0	1	0	0	0	0	0	0	0	2
AT1G20575	1	0	1	0	0	0	0	0	0	0	2
AT1G21070	1	0	1	0	0	0	0	0	0	0	2
AT1G21880	1	0	1	0	0	0	0	0	0	0	2
AT1G22170	1	0	1	0	0	0	0	0	0	0	2
AT1G22780	1	0	1	0	0	0	0	0	0	0	2
AT1G22790	1	0	1	0	0	0	0	0	0	0	2
AT1G23100	1	0	1	0	0	0	0	0	0	0	2
AT1G23790	1	0	1	0	0	0	0	0	0	0	2
AT1G23880	1	0	1	0	0	0	0	0	0	0	2
AT1G24090	1	0	1	0	0	0	0	0	0	0	2
AT1G24095	1	0	1	0	0	0	0	0	0	0	2
AT1G24290	1	0	1	0	0	0	0	0	0	0	2
AT1G24300	1	0	1	0	0	0	0	0	0	0	2
AT1G24764	1	0	1	0	0	0	0	0	0	0	2
AT1G25320	1	0	1	0	0	0	0	0	0	0	2
AT1G26520	1	0	1	0	0	0	0	0	0	0	2
AT1G26530	1	0	1	0	0	0	0	0	0	0	2
AT1G26900	1	0	1	0	0	0	0	0	0	0	2
AT1G26910	1	0	1	0	0	0	0	0	0	0	2
AT1G27120	1	0	1	0	0	0	0	0	0	0	2
AT1G27210	1	0	1	0	0	0	0	0	0	0	2
AT1G28440	1	0	1	0	0	0	0	0	0	0	2
AT1G28530	1	0	1	0	0	0	0	0	0	0	2
AT1G28540	1	0	1	0	0	0	0	0	0	0	2
AT1G29170	1	0	1	0	0	0	0	0	0	0	2
AT1G29410	1	0	1	0	0	0	0	0	0	0	2
AT1G29418	1	0	1	0	0	0	0	0	0	0	2
AT1G29420	1	0	1	0	0	0	0	0	0	0	2
AT1G30330	1	0	1	0	0	0	0	0	0	0	2
AT1G31070	1	0	1	0	0	0	0	0	0	0	2
AT1G32730	1	0	1	0	0	0	0	0	0	0	2
AT1G32760	1	0	1	0	0	0	0	0	0	0	2
AT1G33360	1	0	1	0	0	0	0	0	0	0	2
AT1G33350	1	0	1	0	0	0	0	0	0	0	2
AT1G36160	1	0	1	0	0	0	0	0	0	0	2
AT1G36940	1	0	1	0	0	0	0	0	0	0	2
AT1G43170	1	0	1	0	0	0	0	0	0	0	2
AT1G44900	1	0	1	0	0	0	0	0	0	0	2
AT1G45207	1	0	1	0	0	0	0	0	0	0	2
AT1G47210	1	0	1	0	0	0	0	0	0	0	2
AT1G47670	1	0	1	0	0	0	0	0	0	0	2
AT1G48370	1	0	1	0	0	0	0	0	0	0	2
AT1G48390	1	0	1	0	0	0	0	0	0	0	2
AT1G48630	1	0	1	0	0	0	0	0	0	0	2
AT1G48635	1	0	1	0	0	0	0	0	0	0	2
AT1G49340	1	0	1	0	0	0	0	0	0	0	2
AT1G49760	1	0	1	0	0	0	0	0	0	0	2
AT1G50000	1	0	1	0	0	0	0	0	0	0	2
AT1G50010	1	0	1	0	0	0	0	0	0	0	2
AT1G50790	1	0	1	0	0	0	0	0	0	0	2
AT1G51060	1	0	1	0	0	0	0	0	0	0	2
AT1G51070	1	0	1	0	0	0	0	0	0	0	2
AT1G52150	1	0	1	0	0	0	0	0	0	0	2
AT1G52500	1	0	1	0	0	0	0	0	0	0	2
AT1G52710	1	0	1	0	0	0	0	0	0	0	2
AT1G52720	1	0	1	0	0	0	0	0	0	0	2
AT1G53070	1	0	1	0	0	0	0	0	0	0	2
AT1G53140	1	0	1	0	0	0	0	0	0	0	2
AT1G53300	1	0	1	0	0	0	0	0	0	0	2
AT1G53520	1	0	1	0	0	0	0	0	0	0	2
AT1G53530	1	0	1	0	0	0	0	0	0	0	2
AT1G54580	1	0	1	0	0	0	0	0	0	0	2
AT1G54830	1	0	1	0	0	0	0	0	0	0	2
AT1G55040	1	0	1	0	0	0	0	0	0	0	2
AT1G55320	1	0	1	0	0	0	0	0	0	0	2
AT1G55690	1	0	1	0	0	0	0	0	0	0	2
AT1G56210	1	0	1	0	0	0	0	0	0	0	2
AT1G56570	1	0	1	0	0	0	0	0	0	0	2
AT1G58380	1	0	1	0	0	0	0	0	0	0	2
AT1G59540	1	0	1	0	0	0	0	0	0	0	2
AT1G59990	1	0	1	0	0	0	0	0	0	0	2
AT1G60000	1	0	1	0	0	0	0	0	0	0	2
AT1G60650	1	0	1	0	0	0	0	0	0	0	2
AT1G60660	1	0	1	0	0	0	0	0	0	0	2
AT1G60670	1	0	1	0	0	0	0	0	0	0	2
AT1G60700	1	0	1	0	0	0	0	0	0	0	2
AT1G60800	1	0	1	0	0	0	0	0	0	0	2
AT1G61870	1	0	1	0	0	0	0	0	0	0	2
AT1G62520	1	0	1	0	0	0	0	0	0	0	2
AT1G62914	1	0	1	0	0	0	0	0	0	0	2
AT1G62970	1	0	1	0	0	0	0	0	0	0	2
AT1G63470	1	0	1	0	0	0	0	0	0	0	2
AT1G63480	1	0	1	0	0	0	0	0	0	0	2
AT1G63640	1	0	1	0	0	0	0	0	0	0	2
AT1G64390	1	0	1	0	0	0	0	0	0	0	2
AT1G64450	1	0	1	0	0	0	0	0	0	0	2
AT1G64470	1	0	1	0	0	0	0	0	0	0	2
AT1G64580	1	0	1	0	0	0	0	0	0	0	2
AT1G64583	1	0	1	0	0	0	0	0	0	0	2
AT1G64650	1	0	1	0	0	0	0	0	0	0	2
AT1G64880	1	0	1	0	0	0	0	0	0	0	2
AT1G65295	1	0	1	0	0	0	0	0	0	0	2
AT1G65560	1	0	1	0	0	0	0	0	0	0	2
AT1G67040	1	0	1	0	0	0	0	0	0	0	2
AT1G67620	1	0	1	0	0	0	0	0	0	0	2
AT1G68120	1	0	1	0	0	0	0	0	0	0	2
AT1G68400	1	0	1	0	0	0	0	0	0	0	2
AT1G69030	1	0	1	0	0	0	0	0	0	0	2
AT1G69200	1	0	1	0	0	0	0	0	0	0	2
AT1G69340	1	0	1	0	0	0	0	0	0	0	2
AT1G70370	1	0	1	0	0	0	0	0	0	0	2
AT1G70610	1	0	1	0	0	0	0	0	0	0	2
AT1G71528	1	0	1	0	0	0	0	0	0	0	2
AT1G71530	1	0	1	0	0	0	0	0	0	0	2
AT1G72040	1	0	1	0	0	0	0	0	0	0	2
AT1G72050	1	0	1	0	0	0	0	0	0	0	2
AT1G72125	1	0	1	0	0	0	0	0	0	0	2
AT1G72270	1	0	1	0	0	0	0	0	0	0	2
AT1G72310	1	0	1	0	0	0	0	0	0	0	2
AT1G72680	1	0	1	0	0	0	0	0	0	0	2
AT1G72690	1	0	1	0	0	0	0	0	0	0	2
AT1G72970	1	0	1	0	0	0	0	0	0	0	2
AT1G73080	1	0	1	0	0	0	0	0	0	0	2
AT1G74030	1	0	1	0	0	0	0	0	0	0	2
AT1G74040	1	0	1	0	0	0	0	0	0	0	2
AT1G74390	1	0	1	0	0	0	0	0	0	0	2
AT1G74400	1	0	1	0	0	0	0	0	0	0	2
AT1G74630	1	0	1	0	0	0	0	0	0	0	2
AT1G75090	1	0	1	0	0	0	0	0	0	0	2
AT1G75230	1	0	1	0	0	0	0	0	0	0	2
AT1G75580	1	0	1	0	0	0	0	0	0	0	2
AT1G76460	1	0	1	0	0	0	0	0	0	0	2
AT1G76870	1	0	1	0	0	0	0	0	0	0	2
AT1G76950	1	0	1	0	0	0	0	0	0	0	2
AT1G77170	1	0	1	0	0	0	0	0	0	0	2
AT1G77270	1	0	1	0	0	0	0	0	0	0	2
AT1G77320	1	0	1	0	0	0	0	0	0	0	2
AT1G77400	1	0	1	0	0	0	0	0	0	0	2
AT1G77405	1	0	1	0	0	0	0	0	0	0	2
AT1G77620	1	0	1	0	0	0	0	0	0	0	2
AT1G77630	1	0	1	0	0	0	0	0	0	0	2
AT1G77720	1	0	1	0	0	0	0	0	0	0	2
AT1G78050	1	0	1	0	0	0	0	0	0	0	2
AT1G78172	1	0	1	0	0	0	0	0	0	0	2
AT1G78180	1	0	1	0	0	0	0	0	0	0	2
AT1G78190	1	0	1	0	0	0	0	0	0	0	2
AT1G78200	1	0	1	0	0	0	0	0	0	0	2
AT1G78206	1	0	1	0	0	0	0	0	0	0	2
AT1G78210	1	0	1	0	0	0	0	0	0	0	2
AT1G78940	1	0	1	0	0	0	0	0	0	0	2
AT1G79060	1	0	1	0	0	0	0	0	0	0	2
AT1G79080	1	0	1	0	0	0	0	0	0	0	2
AT1G79090	1	0	1	0	0	0	0	0	0	0	2
AT1G79150	1	0	1	0	0	0	0	0	0	0	2
AT1G79630	1	0	1	0	0	0	0	0	0	0	2
AT1G79750	1	0	1	0	0	0	0	0	0	0	2
AT1G79760	1	0	1	0	0	0	0	0	0	0	2
AT1G79990	1	0	1	0	0	0	0	0	0	0	2
AT1G80080	1	0	1	0	0	0	0	0	0	0	2
AT1G80750	1	0	1	0	0	0	0	0	0	0	2
AT1G80870	1	0	1	0	0	0	0	0	0	0	2
AT2G01250	1	0	1	0	0	0	0	0	0	0	2
AT2G01750	1	0	1	0	0	0	0	0	0	0	2
AT2G01740	1	0	1	0	0	0	0	0	0	0	2
AT2G02790	1	0	1	0	0	0	0	0	0	0	2
AT2G03240	1	0	1	0	0	0	0	0	0	0	2
AT2G03280	1	0	1	0	0	0	0	0	0	0	2
AT2G03880	1	0	1	0	0	0	0	0	0	0	2
AT2G04230	1	0	1	0	0	0	0	0	0	0	2
AT2G04235	1	0	1	0	0	0	0	0	0	0	2
AT2G04780	1	0	1	0	0	0	0	0	0	0	2
AT2G05210	1	0	1	0	0	0	0	0	0	0	2
AT2G05632	1	0	1	0	0	0	0	0	0	0	2
AT2G05790	1	0	1	0	0	0	0	0	0	0	2
AT2G05810	1	0	1	0	0	0	0	0	0	0	2
AT2G05812	1	0	1	0	0	0	0	0	0	0	2
AT2G05920	1	0	1	0	0	0	0	0	0	0	2
AT2G05990	1	0	1	0	0	0	0	0	0	0	2
AT2G09990	1	0	1	0	0	0	0	0	0	0	2
AT2G14860	1	0	1	0	0	0	0	0	0	0	2
AT2G15440	1	0	1	0	0	0	0	0	0	0	2
AT2G17230	1	0	1	0	0	0	0	0	0	0	2
AT2G17280	1	0	1	0	0	0	0	0	0	0	2
AT2G17370	1	0	1	0	0	0	0	0	0	0	2
AT2G17480	1	0	1	0	0	0	0	0	0	0	2
AT2G17620	1	0	1	0	0	0	0	0	0	0	2
AT2G17630	1	0	1	0	0	0	0	0	0	0	2
AT2G17870	1	0	1	0	0	0	0	0	0	0	2
AT2G18330	1	0	1	0	0	0	0	0	0	0	2
AT2G18520	1	0	1	0	0	0	0	0	0	0	2
AT2G18760	1	0	1	0	0	0	0	0	0	0	2
AT2G19170	1	0	1	0	0	0	0	0	0	0	2
AT2G19620	1	0	1	0	0	0	0	0	0	0	2
AT2G19640	1	0	1	0	0	0	0	0	0	0	2
AT2G19780	1	0	1	0	0	0	0	0	0	0	2
AT2G20290	1	0	1	0	0	0	0	0	0	0	2
AT2G20680	1	0	1	0	0	0	0	0	0	0	2
AT2G20700	1	0	1	0	0	0	0	0	0	0	2
AT2G20710	1	0	1	0	0	0	0	0	0	0	2
AT2G20780	1	0	1	0	0	0	0	0	0	0	2
AT2G20830	1	0	1	0	0	0	0	0	0	0	2
AT2G20860	1	0	1	0	0	0	0	0	0	0	2
AT2G20850	1	0	1	0	0	0	0	0	0	0	2
AT2G21450	1	0	1	0	0	0	0	0	0	0	2
AT2G21440	1	0	1	0	0	0	0	0	0	0	2
AT2G22140	1	0	1	0	0	0	0	0	0	0	2
AT2G22400	1	0	1	0	0	0	0	0	0	0	2
AT2G22410	1	0	1	0	0	0	0	0	0	0	2
AT2G22420	1	0	1	0	0	0	0	0	0	0	2
AT2G22425	1	0	1	0	0	0	0	0	0	0	2
AT2G22720	1	0	1	0	0	0	0	0	0	0	2
AT2G23150	1	0	1	0	0	0	0	0	0	0	2
AT2G23690	1	0	1	0	0	0	0	0	0	0	2
AT2G23700	1	0	1	0	0	0	0	0	0	0	2
AT2G24170	1	0	1	0	0	0	0	0	0	0	2
AT2G24220	1	0	1	0	0	0	0	0	0	0	2
AT2G24230	1	0	1	0	0	0	0	0	0	0	2
AT2G24310	1	0	1	0	0	0	0	0	0	0	2
AT2G24440	1	0	1	0	0	0	0	0	0	0	2
AT2G24630	1	0	1	0	0	0	0	0	0	0	2
AT2G25050	1	0	1	0	0	0	0	0	0	0	2
AT2G25052	1	0	1	0	0	0	0	0	0	0	2
AT2G25420	1	0	1	0	0	0	0	0	0	0	2
AT2G25530	1	0	1	0	0	0	0	0	0	0	2
AT2G25640	1	0	1	0	0	0	0	0	0	0	2
AT2G25880	1	0	1	0	0	0	0	0	0	0	2
AT2G26260	1	0	1	0	0	0	0	0	0	0	2
AT2G26267	1	0	1	0	0	0	0	0	0	0	2
AT2G26270	1	0	1	0	0	0	0	0	0	0	2
AT2G26520	1	0	1	0	0	0	0	0	0	0	2
AT2G26910	1	0	1	0	0	0	0	0	0	0	2
AT2G27130	1	0	1	0	0	0	0	0	0	0	2
AT2G27810	1	0	1	0	0	0	0	0	0	0	2
AT2G28100	1	0	1	0	0	0	0	0	0	0	2
AT2G28150	1	0	1	0	0	0	0	0	0	0	2
AT2G28480	1	0	1	0	0	0	0	0	0	0	2
AT2G28620	1	0	1	0	0	0	0	0	0	0	2
AT2G29680	1	0	1	0	0	0	0	0	0	0	2
AT2G30200	1	0	1	0	0	0	0	0	0	0	2
AT2G30490	1	0	1	0	0	0	0	0	0	0	2
AT2G30620	1	0	1	0	0	0	0	0	0	0	2
AT2G30630	1	0	1	0	0	0	0	0	0	0	2
AT2G30820	1	0	1	0	0	0	0	0	0	0	2
AT2G31010	1	0	1	0	0	0	0	0	0	0	2
AT2G31320	1	0	1	0	0	0	0	0	0	0	2
AT2G32235	1	0	1	0	0	0	0	0	0	0	2
AT2G32560	1	0	1	0	0	0	0	0	0	0	2
AT2G32670	1	0	1	0	0	0	0	0	0	0	2
AT2G32720	1	0	1	0	0	0	0	0	0	0	2
AT2G32765	1	0	1	0	0	0	0	0	0	0	2
AT2G32770	1	0	1	0	0	0	0	0	0	0	2
AT2G33330	1	0	1	0	0	0	0	0	0	0	2
AT2G33560	1	0	1	0	0	0	0	0	0	0	2
AT2G33570	1	0	1	0	0	0	0	0	0	0	2
AT2G33793	1	0	1	0	0	0	0	0	0	0	2
AT2G34190	1	0	1	0	0	0	0	0	0	0	2
AT2G34240	1	0	1	0	0	0	0	0	0	0	2
AT2G34480	1	0	1	0	0	0	0	0	0	0	2
AT2G34520	1	0	1	0	0	0	0	0	0	0	2
AT2G34980	1	0	1	0	0	0	0	0	0	0	2
AT2G35035	1	0	1	0	0	0	0	0	0	0	2
AT2G35040	1	0	1	0	0	0	0	0	0	0	2
AT2G35160	1	0	1	0	0	0	0	0	0	0	2
AT2G35650	1	0	1	0	0	0	0	0	0	0	2
AT2G35744	1	0	1	0	0	0	0	0	0	0	2
AT2G35747	1	0	1	0	0	0	0	0	0	0	2
AT2G35750	1	0	1	0	0	0	0	0	0	0	2
AT2G35859	1	0	1	0	0	0	0	0	0	0	2
AT2G35860	1	0	1	0	0	0	0	0	0	0	2
AT2G36010	1	0	1	0	0	0	0	0	0	0	2
AT2G36200	1	0	1	0	0	0	0	0	0	0	2
AT2G36880	1	0	1	0	0	0	0	0	0	0	2
AT2G36885	1	0	1	0	0	0	0	0	0	0	2
AT2G36990	1	0	1	0	0	0	0	0	0	0	2
AT2G37070	1	0	1	0	0	0	0	0	0	0	2
AT2G37190	1	0	1	0	0	0	0	0	0	0	2
AT2G37195	1	0	1	0	0	0	0	0	0	0	2
AT2G37600	1	0	1	0	0	0	0	0	0	0	2
AT2G37790	1	0	1	0	0	0	0	0	0	0	2
AT2G38070	1	0	1	0	0	0	0	0	0	0	2
AT2G38090	1	0	1	0	0	0	0	0	0	0	2
AT2G38360	1	0	1	0	0	0	0	0	0	0	2
AT2G38580	1	0	1	0	0	0	0	0	0	0	2
AT2G38570	1	0	1	0	0	0	0	0	0	0	2
AT2G38730	1	0	1	0	0	0	0	0	0	0	2
AT2G38970	1	0	1	0	0	0	0	0	0	0	2
AT2G39280	1	0	1	0	0	0	0	0	0	0	2
AT2G39290	1	0	1	0	0	0	0	0	0	0	2
AT2G39560	1	0	1	0	0	0	0	0	0	0	2
AT2G40240	1	0	1	0	0	0	0	0	0	0	2
AT2G40400	1	0	1	0	0	0	0	0	0	0	2
AT2G40620	1	0	1	0	0	0	0	0	0	0	2
AT2G40640	1	0	1	0	0	0	0	0	0	0	2
AT2G40815	1	0	1	0	0	0	0	0	0	0	2
AT2G41530	1	0	1	0	0	0	0	0	0	0	2
AT2G41540	1	0	1	0	0	0	0	0	0	0	2
AT2G41670	1	0	1	0	0	0	0	0	0	0	2
AT2G41820	1	0	1	0	0	0	0	0	0	0	2
AT2G42570	1	0	1	0	0	0	0	0	0	0	2
AT2G42800	1	0	1	0	0	0	0	0	0	0	2
AT2G42960	1	0	1	0	0	0	0	0	0	0	2
AT2G43360	1	0	1	0	0	0	0	0	0	0	2
AT2G43370	1	0	1	0	0	0	0	0	0	0	2
AT2G43900	1	0	1	0	0	0	0	0	0	0	2
AT2G44580	1	0	1	0	0	0	0	0	0	0	2
AT2G44630	1	0	1	0	0	0	0	0	0	0	2
AT2G44640	1	0	1	0	0	0	0	0	0	0	2
AT2G45470	1	0	1	0	0	0	0	0	0	0	2
AT2G45860	1	0	1	0	0	0	0	0	0	0	2
AT2G46290	1	0	1	0	0	0	0	0	0	0	2
AT2G46380	1	0	1	0	0	0	0	0	0	0	2
AT2G46810	1	0	1	0	0	0	0	0	0	0	2
AT2G46890	1	0	1	0	0	0	0	0	0	0	2
AT2G46930	1	0	1	0	0	0	0	0	0	0	2
AT2G47000	1	0	1	0	0	0	0	0	0	0	2
AT2G47090	1	0	1	0	0	0	0	0	0	0	2
AT2G47100	1	0	1	0	0	0	0	0	0	0	2
AT2G47110	1	0	1	0	0	0	0	0	0	0	2
AT2G47115	1	0	1	0	0	0	0	0	0	0	2
AT2G47500	1	0	1	0	0	0	0	0	0	0	2
AT2G47590	1	0	1	0	0	0	0	0	0	0	2
AT3G01015	1	0	1	0	0	0	0	0	0	0	2
AT3G01450	1	0	1	0	0	0	0	0	0	0	2
AT3G02230	1	0	1	0	0	0	0	0	0	0	2
AT3G02540	1	0	1	0	0	0	0	0	0	0	2
AT3G02550	1	0	1	0	0	0	0	0	0	0	2
AT3G02580	1	0	1	0	0	0	0	0	0	0	2
AT3G02645	1	0	1	0	0	0	0	0	0	0	2
AT3G02650	1	0	1	0	0	0	0	0	0	0	2
AT3G03130	1	0	1	0	0	0	0	0	0	0	2
AT3G03140	1	0	1	0	0	0	0	0	0	0	2
AT3G03220	1	0	1	0	0	0	0	0	0	0	2
AT3G03630	1	0	1	0	0	0	0	0	0	0	2
AT3G03640	1	0	1	0	0	0	0	0	0	0	2
AT3G04400	1	0	1	0	0	0	0	0	0	0	2
AT3G04450	1	0	1	0	0	0	0	0	0	0	2
AT3G04440	1	0	1	0	0	0	0	0	0	0	2
AT3G04470	1	0	1	0	0	0	0	0	0	0	2
AT3G04620	1	0	1	0	0	0	0	0	0	0	2
AT3G05020	1	0	1	0	0	0	0	0	0	0	2
AT3G05030	1	0	1	0	0	0	0	0	0	0	2
AT3G05560	1	0	1	0	0	0	0	0	0	0	2
AT3G05590	1	0	1	0	0	0	0	0	0	0	2
AT3G05720	1	0	1	0	0	0	0	0	0	0	2
AT3G06030	1	0	1	0	0	0	0	0	0	0	2
AT3G06035	1	0	1	0	0	0	0	0	0	0	2
AT3G06130	1	0	1	0	0	0	0	0	0	0	2
AT3G06140	1	0	1	0	0	0	0	0	0	0	2
AT3G06440	1	0	1	0	0	0	0	0	0	0	2
AT3G06450	1	0	1	0	0	0	0	0	0	0	2
AT3G06550	1	0	1	0	0	0	0	0	0	0	2
AT3G06840	1	0	1	0	0	0	0	0	0	0	2
AT3G06890	1	0	1	0	0	0	0	0	0	0	2
AT3G07055	1	0	1	0	0	0	0	0	0	0	2
AT3G07060	1	0	1	0	0	0	0	0	0	0	2
AT3G07210	1	0	1	0	0	0	0	0	0	0	2
AT3G07290	1	0	1	0	0	0	0	0	0	0	2
AT3G07320	1	0	1	0	0	0	0	0	0	0	2
AT3G07410	1	0	1	0	0	0	0	0	0	0	2
AT3G07500	1	0	1	0	0	0	0	0	0	0	2
AT3G07510	1	0	1	0	0	0	0	0	0	0	2
AT3G07860	1	0	1	0	0	0	0	0	0	0	2
AT3G08630	1	0	1	0	0	0	0	0	0	0	2
AT3G08680	1	0	1	0	0	0	0	0	0	0	2
AT3G08770	1	0	1	0	0	0	0	0	0	0	2
AT3G08980	1	0	1	0	0	0	0	0	0	0	2
AT3G09200	1	0	1	0	0	0	0	0	0	0	2
AT3G09630	1	0	1	0	0	0	0	0	0	0	2
AT3G09730	1	0	1	0	0	0	0	0	0	0	2
AT3G09720	1	0	1	0	0	0	0	0	0	0	2
AT3G10180	1	0	1	0	0	0	0	0	0	0	2
AT3G10310	1	0	1	0	0	0	0	0	0	0	2
AT3G10560	1	0	1	0	0	0	0	0	0	0	2
AT3G10940	1	0	1	0	0	0	0	0	0	0	2
AT3G11760	1	0	1	0	0	0	0	0	0	0	2
AT3G11940	1	0	1	0	0	0	0	0	0	0	2
AT3G12120	1	0	1	0	0	0	0	0	0	0	2
AT3G12145	1	0	1	0	0	0	0	0	0	0	2
AT3G12400	1	0	1	0	0	0	0	0	0	0	2
AT3G12640	1	0	1	0	0	0	0	0	0	0	2
AT3G12650	1	0	1	0	0	0	0	0	0	0	2
AT3G12690	1	0	1	0	0	0	0	0	0	0	2
AT3G13000	1	0	1	0	0	0	0	0	0	0	2
AT3G13275	1	0	1	0	0	0	0	0	0	0	2
AT3G13277	1	0	1	0	0	0	0	0	0	0	2
AT3G13470	1	0	1	0	0	0	0	0	0	0	2
AT3G13510	1	0	1	0	0	0	0	0	0	0	2
AT3G13670	1	0	1	0	0	0	0	0	0	0	2
AT3G14000	1	0	1	0	0	0	0	0	0	0	2
AT3G14180	1	0	1	0	0	0	0	0	0	0	2
AT3G14240	1	0	1	0	0	0	0	0	0	0	2
AT3G14940	1	0	1	0	0	0	0	0	0	0	2
AT3G15000	1	0	1	0	0	0	0	0	0	0	2
AT3G15010	1	0	1	0	0	0	0	0	0	0	2
AT3G15140	1	0	1	0	0	0	0	0	0	0	2
AT3G15150	1	0	1	0	0	0	0	0	0	0	2
AT3G15260	1	0	1	0	0	0	0	0	0	0	2
AT3G15270	1	0	1	0	0	0	0	0	0	0	2
AT3G15470	1	0	1	0	0	0	0	0	0	0	2
AT3G16060	1	0	1	0	0	0	0	0	0	0	2
AT3G16160	1	0	1	0	0	0	0	0	0	0	2
AT3G16170	1	0	1	0	0	0	0	0	0	0	2
AT3G16500	1	0	1	0	0	0	0	0	0	0	2
AT3G16950	1	0	1	0	0	0	0	0	0	0	2
AT3G17350	1	0	1	0	0	0	0	0	0	0	2
AT3G17830	1	0	1	0	0	0	0	0	0	0	2
AT3G17840	1	0	1	0	0	0	0	0	0	0	2
AT3G18030	1	0	1	0	0	0	0	0	0	0	2
AT3G18090	1	0	1	0	0	0	0	0	0	0	2
AT3G18130	1	0	1	0	0	0	0	0	0	0	2
AT3G18140	1	0	1	0	0	0	0	0	0	0	2
AT3G18210	1	0	1	0	0	0	0	0	0	0	2
AT3G18215	1	0	1	0	0	0	0	0	0	0	2
AT3G18510	1	0	1	0	0	0	0	0	0	0	2
AT3G18630	1	0	1	0	0	0	0	0	0	0	2
AT3G18730	1	0	1	0	0	0	0	0	0	0	2
AT3G18740	1	0	1	0	0	0	0	0	0	0	2
AT3G18960	1	0	1	0	0	0	0	0	0	0	2
AT3G18970	1	0	1	0	0	0	0	0	0	0	2
AT3G19100	1	0	1	0	0	0	0	0	0	0	2
AT3G19120	1	0	1	0	0	0	0	0	0	0	2
AT3G19130	1	0	1	0	0	0	0	0	0	0	2
AT3G19300	1	0	1	0	0	0	0	0	0	0	2
AT3G19570	1	0	1	0	0	0	0	0	0	0	2
AT3G19820	1	0	1	0	0	0	0	0	0	0	2
AT3G20010	1	0	1	0	0	0	0	0	0	0	2
AT3G20015	1	0	1	0	0	0	0	0	0	0	2
AT3G20040	1	0	1	0	0	0	0	0	0	0	2
AT3G20150	1	0	1	0	0	0	0	0	0	0	2
AT3G20350	1	0	1	0	0	0	0	0	0	0	2
AT3G20475	1	0	1	0	0	0	0	0	0	0	2
AT3G20530	1	0	1	0	0	0	0	0	0	0	2
AT3G20540	1	0	1	0	0	0	0	0	0	0	2
AT3G20780	1	0	1	0	0	0	0	0	0	0	2
AT3G20790	1	0	1	0	0	0	0	0	0	0	2
AT3G21190	1	0	1	0	0	0	0	0	0	0	2
AT3G21300	1	0	1	0	0	0	0	0	0	0	2
AT3G21310	1	0	1	0	0	0	0	0	0	0	2
AT3G21400	1	0	1	0	0	0	0	0	0	0	2
AT3G21805	1	0	1	0	0	0	0	0	0	0	2
AT3G22070	1	0	1	0	0	0	0	0	0	0	2
AT3G22072	1	0	1	0	0	0	0	0	0	0	2
AT3G22780	1	0	1	0	0	0	0	0	0	0	2
AT3G22790	1	0	1	0	0	0	0	0	0	0	2
AT3G23660	1	0	1	0	0	0	0	0	0	0	2
AT3G23670	1	0	1	0	0	0	0	0	0	0	2
AT3G23830	1	0	1	0	0	0	0	0	0	0	2
AT3G23940	1	0	1	0	0	0	0	0	0	0	2
AT3G24080	1	0	1	0	0	0	0	0	0	0	2
AT3G24660	1	0	1	0	0	0	0	0	0	0	2
AT3G24800	1	0	1	0	0	0	0	0	0	0	2
AT3G25110	1	0	1	0	0	0	0	0	0	0	2
AT3G25500	1	0	1	0	0	0	0	0	0	0	2
AT3G25520	1	0	1	0	0	0	0	0	0	0	2
AT3G25860	1	0	1	0	0	0	0	0	0	0	2
AT3G25890	1	0	1	0	0	0	0	0	0	0	2
AT3G27280	1	0	1	0	0	0	0	0	0	0	2
AT3G27350	1	0	1	0	0	0	0	0	0	0	2
AT3G27360	1	0	1	0	0	0	0	0	0	0	2
AT3G27380	1	0	1	0	0	0	0	0	0	0	2
AT3G27580	1	0	1	0	0	0	0	0	0	0	2
AT3G27906	1	0	1	0	0	0	0	0	0	0	2
AT3G28640	1	0	1	0	0	0	0	0	0	0	2
AT3G29180	1	0	1	0	0	0	0	0	0	0	2
AT3G29200	1	0	1	0	0	0	0	0	0	0	2
AT3G42170	1	0	1	0	0	0	0	0	0	0	2
AT3G42860	1	0	1	0	0	0	0	0	0	0	2
AT3G43210	1	0	1	0	0	0	0	0	0	0	2
AT3G43720	1	0	1	0	0	0	0	0	0	0	2
AT3G45030	1	0	1	0	0	0	0	0	0	0	2
AT3G45090	1	0	1	0	0	0	0	0	0	0	2
AT3G46990	1	0	1	0	0	0	0	0	0	0	2
AT3G47690	1	0	1	0	0	0	0	0	0	0	2
AT3G48190	1	0	1	0	0	0	0	0	0	0	2
AT3G48500	1	0	1	0	0	0	0	0	0	0	2
AT3G48670	1	0	1	0	0	0	0	0	0	0	2
AT3G48870	1	0	1	0	0	0	0	0	0	0	2
AT3G48880	1	0	1	0	0	0	0	0	0	0	2
AT3G48930	1	0	1	0	0	0	0	0	0	0	2
AT3G48980	1	0	1	0	0	0	0	0	0	0	2
AT3G49010	1	0	1	0	0	0	0	0	0	0	2
AT3G49900	1	0	1	0	0	0	0	0	0	0	2
AT3G50060	1	0	1	0	0	0	0	0	0	0	2
AT3G50100	1	0	1	0	0	0	0	0	0	0	2
AT3G50340	1	0	1	0	0	0	0	0	0	0	2
AT3G50620	1	0	1	0	0	0	0	0	0	0	2
AT3G50780	1	0	1	0	0	0	0	0	0	0	2
AT3G50960	1	0	1	0	0	0	0	0	0	0	2
AT3G51090	1	0	1	0	0	0	0	0	0	0	2
AT3G51150	1	0	1	0	0	0	0	0	0	0	2
AT3G51238	1	0	1	0	0	0	0	0	0	0	2
AT3G51240	1	0	1	0	0	0	0	0	0	0	2
AT3G51470	1	0	1	0	0	0	0	0	0	0	2
AT3G51480	1	0	1	0	0	0	0	0	0	0	2
AT3G51850	1	0	1	0	0	0	0	0	0	0	2
AT3G52100	1	0	1	0	0	0	0	0	0	0	2
AT3G52580	1	0	1	0	0	0	0	0	0	0	2
AT3G52890	1	0	1	0	0	0	0	0	0	0	2
AT3G52930	1	0	1	0	0	0	0	0	0	0	2
AT3G53220	1	0	1	0	0	0	0	0	0	0	2
AT3G53320	1	0	1	0	0	0	0	0	0	0	2
AT3G53340	1	0	1	0	0	0	0	0	0	0	2
AT3G53380	1	0	1	0	0	0	0	0	0	0	2
AT3G53560	1	0	1	0	0	0	0	0	0	0	2
AT3G53570	1	0	1	0	0	0	0	0	0	0	2
AT3G53740	1	0	1	0	0	0	0	0	0	0	2
AT3G53750	1	0	1	0	0	0	0	0	0	0	2
AT3G53760	1	0	1	0	0	0	0	0	0	0	2
AT3G54080	1	0	1	0	0	0	0	0	0	0	2
AT3G54250	1	0	1	0	0	0	0	0	0	0	2
AT3G54560	1	0	1	0	0	0	0	0	0	0	2
AT3G54690	1	0	1	0	0	0	0	0	0	0	2
AT3G54710	1	0	1	0	0	0	0	0	0	0	2
AT3G54910	1	0	1	0	0	0	0	0	0	0	2
AT3G54920	1	0	1	0	0	0	0	0	0	0	2
AT3G54930	1	0	1	0	0	0	0	0	0	0	2
AT3G55005	1	0	1	0	0	0	0	0	0	0	2
AT3G55090	1	0	1	0	0	0	0	0	0	0	2
AT3G55120	1	0	1	0	0	0	0	0	0	0	2
AT3G55280	1	0	1	0	0	0	0	0	0	0	2
AT3G55690	1	0	1	0	0	0	0	0	0	0	2
AT3G56070	1	0	1	0	0	0	0	0	0	0	2
AT3G56090	1	0	1	0	0	0	0	0	0	0	2
AT3G56370	1	0	1	0	0	0	0	0	0	0	2
AT3G56570	1	0	1	0	0	0	0	0	0	0	2
AT3G57150	1	0	1	0	0	0	0	0	0	0	2
AT3G57830	1	0	1	0	0	0	0	0	0	0	2
AT3G58100	1	0	1	0	0	0	0	0	0	0	2
AT3G58110	1	0	1	0	0	0	0	0	0	0	2
AT3G58200	1	0	1	0	0	0	0	0	0	0	2
AT3G58480	1	0	1	0	0	0	0	0	0	0	2
AT3G58470	1	0	1	0	0	0	0	0	0	0	2
AT3G58620	1	0	1	0	0	0	0	0	0	0	2
AT3G58650	1	0	1	0	0	0	0	0	0	0	2
AT3G58660	1	0	1	0	0	0	0	0	0	0	2
AT3G58930	1	0	1	0	0	0	0	0	0	0	2
AT3G59420	1	0	1	0	0	0	0	0	0	0	2
AT3G59820	1	0	1	0	0	0	0	0	0	0	2
AT3G59830	1	0	1	0	0	0	0	0	0	0	2
AT3G59840	1	0	1	0	0	0	0	0	0	0	2
AT3G60245	1	0	1	0	0	0	0	0	0	0	2
AT3G60380	1	0	1	0	0	0	0	0	0	0	2
AT3G60450	1	0	1	0	0	0	0	0	0	0	2
AT3G60630	1	0	1	0	0	0	0	0	0	0	2
AT3G61100	1	0	1	0	0	0	0	0	0	0	2
AT3G61105	1	0	1	0	0	0	0	0	0	0	2
AT3G61110	1	0	1	0	0	0	0	0	0	0	2
AT3G61520	1	0	1	0	0	0	0	0	0	0	2
AT3G62060	1	0	1	0	0	0	0	0	0	0	2
AT3G62300	1	0	1	0	0	0	0	0	0	0	2
AT3G62870	1	0	1	0	0	0	0	0	0	0	2
AT3G63090	1	0	1	0	0	0	0	0	0	0	2
AT3G63480	1	0	1	0	0	0	0	0	0	0	2
AT3G63490	1	0	1	0	0	0	0	0	0	0	2
AT3G63500	1	0	1	0	0	0	0	0	0	0	2
AT3G63530	1	0	1	0	0	0	0	0	0	0	2
AT3G63540	1	0	1	0	0	0	0	0	0	0	2
AT4G00100	1	0	1	0	0	0	0	0	0	0	2
AT4G00110	1	0	1	0	0	0	0	0	0	0	2
AT4G00651	1	0	1	0	0	0	0	0	0	0	2
AT4G01580	1	0	1	0	0	0	0	0	0	0	2
AT4G03190	1	0	1	0	0	0	0	0	0	0	2
AT4G03200	1	0	1	0	0	0	0	0	0	0	2
AT4G03205	1	0	1	0	0	0	0	0	0	0	2
AT4G03210	1	0	1	0	0	0	0	0	0	0	2
AT4G03220	1	0	1	0	0	0	0	0	0	0	2
AT4G04190	1	0	1	0	0	0	0	0	0	0	2
AT4G07960	1	0	1	0	0	0	0	0	0	0	2
AT4G08685	1	0	1	0	0	0	0	0	0	0	2
AT4G08690	1	0	1	0	0	0	0	0	0	0	2
AT4G09160	1	0	1	0	0	0	0	0	0	0	2
AT4G09640	1	0	1	0	0	0	0	0	0	0	2
AT4G10390	1	0	1	0	0	0	0	0	0	0	2
AT4G10420	1	0	1	0	0	0	0	0	0	0	2
AT4G10430	1	0	1	0	0	0	0	0	0	0	2
AT4G10840	1	0	1	0	0	0	0	0	0	0	2
AT4G11060	1	0	1	0	0	0	0	0	0	0	2
AT4G11130	1	0	1	0	0	0	0	0	0	0	2
AT4G11820	1	0	1	0	0	0	0	0	0	0	2
AT4G12620	1	0	1	0	0	0	0	0	0	0	2
AT4G12640	1	0	1	0	0	0	0	0	0	0	2
AT4G12700	1	0	1	0	0	0	0	0	0	0	2
AT4G13710	1	0	1	0	0	0	0	0	0	0	2
AT4G13720	1	0	1	0	0	0	0	0	0	0	2
AT4G13990	1	0	1	0	0	0	0	0	0	0	2
AT4G14096	1	0	1	0	0	0	0	0	0	0	2
AT4G14150	1	0	1	0	0	0	0	0	0	0	2
AT4G14200	1	0	1	0	0	0	0	0	0	0	2
AT4G14700	1	0	1	0	0	0	0	0	0	0	2
AT4G14905	1	0	1	0	0	0	0	0	0	0	2
AT4G14910	1	0	1	0	0	0	0	0	0	0	2
AT4G14960	1	0	1	0	0	0	0	0	0	0	2
AT4G15000	1	0	1	0	0	0	0	0	0	0	2
AT4G15480	1	0	1	0	0	0	0	0	0	0	2
AT4G15830	1	0	1	0	0	0	0	0	0	0	2
AT4G15840	1	0	1	0	0	0	0	0	0	0	2
AT4G16120	1	0	1	0	0	0	0	0	0	0	2
AT4G16141	1	0	1	0	0	0	0	0	0	0	2
AT4G16340	1	0	1	0	0	0	0	0	0	0	2
AT4G16450	1	0	1	0	0	0	0	0	0	0	2
AT4G16610	1	0	1	0	0	0	0	0	0	0	2
AT4G16650	1	0	1	0	0	0	0	0	0	0	2
AT4G17190	1	0	1	0	0	0	0	0	0	0	2
AT4G17390	1	0	1	0	0	0	0	0	0	0	2
AT4G17610	1	0	1	0	0	0	0	0	0	0	2
AT4G20910	1	0	1	0	0	0	0	0	0	0	2
AT4G21320	1	0	1	0	0	0	0	0	0	0	2
AT4G21430	1	0	1	0	0	0	0	0	0	0	2
AT4G21810	1	0	1	0	0	0	0	0	0	0	2
AT4G21820	1	0	1	0	0	0	0	0	0	0	2
AT4G22240	1	0	1	0	0	0	0	0	0	0	2
AT4G22300	1	0	1	0	0	0	0	0	0	0	2
AT4G22305	1	0	1	0	0	0	0	0	0	0	2
AT4G22560	1	0	1	0	0	0	0	0	0	0	2
AT4G22756	1	0	1	0	0	0	0	0	0	0	2
AT4G23750	1	0	1	0	0	0	0	0	0	0	2
AT4G24670	1	0	1	0	0	0	0	0	0	0	2
AT4G24750	1	0	1	0	0	0	0	0	0	0	2
AT4G24790	1	0	1	0	0	0	0	0	0	0	2
AT4G24860	1	0	1	0	0	0	0	0	0	0	2
AT4G24880	1	0	1	0	0	0	0	0	0	0	2
AT4G24960	1	0	1	0	0	0	0	0	0	0	2
AT4G25150	1	0	1	0	0	0	0	0	0	0	2
AT4G25210	1	0	1	0	0	0	0	0	0	0	2
AT4G25630	1	0	1	0	0	0	0	0	0	0	2
AT4G25835	1	0	1	0	0	0	0	0	0	0	2
AT4G25890	1	0	1	0	0	0	0	0	0	0	2
AT4G26600	1	0	1	0	0	0	0	0	0	0	2
AT4G26660	1	0	1	0	0	0	0	0	0	0	2
AT4G27720	1	0	1	0	0	0	0	0	0	0	2
AT4G27910	1	0	1	0	0	0	0	0	0	0	2
AT4G28050	1	0	1	0	0	0	0	0	0	0	2
AT4G28170	1	0	1	0	0	0	0	0	0	0	2
AT4G28180	1	0	1	0	0	0	0	0	0	0	2
AT4G28250	1	0	1	0	0	0	0	0	0	0	2
AT4G28650	1	0	1	0	0	0	0	0	0	0	2
AT4G28652	1	0	1	0	0	0	0	0	0	0	2
AT4G29240	1	0	1	0	0	0	0	0	0	0	2
AT4G29360	1	0	1	0	0	0	0	0	0	0	2
AT4G29410	1	0	1	0	0	0	0	0	0	0	2
AT4G29850	1	0	1	0	0	0	0	0	0	0	2
AT4G29860	1	0	1	0	0	0	0	0	0	0	2
AT4G30700	1	0	1	0	0	0	0	0	0	0	2
AT4G30800	1	0	1	0	0	0	0	0	0	0	2
AT4G30935	1	0	1	0	0	0	0	0	0	0	2
AT4G30940	1	0	1	0	0	0	0	0	0	0	2
AT4G30996	1	0	1	0	0	0	0	0	0	0	2
AT4G31360	1	0	1	0	0	0	0	0	0	0	2
AT4G31840	1	0	1	0	0	0	0	0	0	0	2
AT4G31850	1	0	1	0	0	0	0	0	0	0	2
AT4G31880	1	0	1	0	0	0	0	0	0	0	2
AT4G32450	1	0	1	0	0	0	0	0	0	0	2
AT4G32460	1	0	1	0	0	0	0	0	0	0	2
AT4G32710	1	0	1	0	0	0	0	0	0	0	2
AT4G32730	1	0	1	0	0	0	0	0	0	0	2
AT4G32830	1	0	1	0	0	0	0	0	0	0	2
AT4G32840	1	0	1	0	0	0	0	0	0	0	2
AT4G32920	1	0	1	0	0	0	0	0	0	0	2
AT4G33110	1	0	1	0	0	0	0	0	0	0	2
AT4G33130	1	0	1	0	0	0	0	0	0	0	2
AT4G33400	1	0	1	0	0	0	0	0	0	0	2
AT4G33410	1	0	1	0	0	0	0	0	0	0	2
AT4G34215	1	0	1	0	0	0	0	0	0	0	2
AT4G34220	1	0	1	0	0	0	0	0	0	0	2
AT4G34500	1	0	1	0	0	0	0	0	0	0	2
AT4G34510	1	0	1	0	0	0	0	0	0	0	2
AT4G34555	1	0	1	0	0	0	0	0	0	0	2
AT4G35100	1	0	1	0	0	0	0	0	0	0	2
AT4G35130	1	0	1	0	0	0	0	0	0	0	2
AT4G35519	1	0	1	0	0	0	0	0	0	0	2
AT4G35520	1	0	1	0	0	0	0	0	0	0	2
AT4G35730	1	0	1	0	0	0	0	0	0	0	2
AT4G35880	1	0	1	0	0	0	0	0	0	0	2
AT4G35920	1	0	1	0	0	0	0	0	0	0	2
AT4G35930	1	0	1	0	0	0	0	0	0	0	2
AT4G36180	1	0	1	0	0	0	0	0	0	0	2
AT4G37170	1	0	1	0	0	0	0	0	0	0	2
AT4G37225	1	0	1	0	0	0	0	0	0	0	2
AT4G37230	1	0	1	0	0	0	0	0	0	0	2
AT4G37235	1	0	1	0	0	0	0	0	0	0	2
AT4G37240	1	0	1	0	0	0	0	0	0	0	2
AT4G37890	1	0	1	0	0	0	0	0	0	0	2
AT4G37895	1	0	1	0	0	0	0	0	0	0	2
[truncated: 12,827 more rows]
