# Supplementary material
Source: MDPI journal article supplement (https://www.mdpi.com/2075-4655/1/2/8)
Supplement: s1 [file s1 › Supplementary/Tables-S1to6/Table_S5.xls]

## Sheet: H3K4me3 targets
			adj_pvalue
	Go-Term	Go-Description	L	t_L	t0	t_t0	t2	t_t2	I	t_I
biological	GO:0000087	M phase of mitotic cell cycle	7.34632E-4	1	1.18794E-7	1	2.80678E-10	1	5.2818E-8	1
	GO:0000103	sulfate assimilation	1.75871E-2	1	5.45386E-3	1	5.59006E-3	1	2.22188E-2	1
	GO:0000160	two-component signal transduction system (phosphorelay)	1.83734E-3	1	3.0112E-3	1	3.38716E-3	1	1.35582E-3	1
	GO:0000165	MAPK cascade	1.90495E-2	1	2.53143E-2	1	2.55948E-2	1	2.22188E-2	1
	GO:0000226	microtubule cytoskeleton organization		0	4.03893E-5	1	4.38399E-5	1	3.95413E-3	1
	GO:0000271	polysaccharide biosynthetic process	9.55868E-9	1	2.04779E-9	1	2.38461E-10	1	9.74129E-9	1
	GO:0000273	lipoate metabolic process	3.40156E-2	1	4.30688E-2	1	4.36382E-2	1	3.8361E-2	1
	GO:0000278	mitotic cell cycle	4.54523E-5	1	2.86009E-12	1	8.66163E-15	1	7.74821E-13	1
	GO:0000280	nuclear division	2.02627E-3	1	1.3708E-9	1	4.90313E-11	1	9.74129E-9	1
	GO:0000303	response to superoxide	2.71174E-2	1		0		0		0
	GO:0000394	RNA splicing, via endonucleolytic cleavage and ligation	4.18529E-2	1		0		0	4.87977E-2	1
	GO:0000723	telomere maintenance	1.60359E-2	1	2.3127E-2	1	2.3497E-2	1	1.9709E-2	1
	GO:0000724	double-strand break repair via homologous recombination		0	5.11584E-3	1	5.20142E-3	1	4.1604E-3	1
	GO:0000902	cell morphogenesis	8.27391E-4	1	8.73618E-6	1	5.39009E-6	1	2.95439E-6	1
	GO:0000904	cell morphogenesis involved in differentiation	3.01477E-3	1	8.08618E-3	1	3.33777E-3	1	5.12274E-3	1
	GO:0000910	cytokinesis	4.22228E-3	1	1.42072E-10	1	1.58837E-10	1	3.05317E-7	1
	GO:0000911	cytokinesis by cell plate formation		0	9.89043E-5	1	1.04622E-4	1	5.587E-3	1
	GO:0000919	cell plate assembly	3.40156E-2	1	4.30688E-2	1	4.36382E-2	1	3.8361E-2	1
	GO:0001510	RNA methylation	6.50689E-3	1	2.07144E-3	1	2.1179E-3	1	1.50249E-3	1
	GO:0001522	pseudouridine synthesis	6.27459E-5	1	1.55177E-4	1	1.62101E-4	1	9.86986E-5	1
	GO:0001539	ciliary or flagellar motility	4.24297E-2	1		0		0		0
	GO:0001558	regulation of cell growth	2.71174E-2	1	8.87406E-3	1	8.91038E-3	1	3.35491E-2	1
	GO:0001666	response to hypoxia		0	1.7632E-2	1	1.78256E-2	1	4.87977E-2	1
	GO:0002237	response to molecule of bacterial origin	3.23104E-3	1		0		0		0
	GO:0002831	regulation of response to biotic stimulus		0	1.5011E-2	1		0	1.28583E-2	1
	GO:0005976	polysaccharide metabolic process	9.32933E-3	1	1.08734E-3	1	8.04515E-4	1	3.16729E-3	1
	GO:0005978	glycogen biosynthetic process		0	2.07144E-3	1	2.1179E-3	1	3.35491E-2	1
	GO:0005982	starch metabolic process	3.1996E-4	1	8.0637E-6	1	8.43921E-6	1	2.62024E-5	1
	GO:0005983	starch catabolic process	2.71174E-2	1	8.87406E-3	1	8.91038E-3	1	7.18761E-3	1
	GO:0006004	fucose metabolic process	3.40156E-2	1	4.30688E-2	1	4.36382E-2	1	3.8361E-2	1
	GO:0006006	glucose metabolic process	6.60034E-14	1	5.26881E-13	1	1.58957E-13	1	6.21125E-16	1
	GO:0006007	glucose catabolic process	9.81899E-15	1	4.44838E-14	1	1.02391E-14	1	9.31368E-16	1
	GO:0006012	galactose metabolic process	1.03439E-2	1	6.12725E-3	1	6.3422E-3	1	1.45044E-2	1
	GO:0006066	alcohol metabolic process	4.85108E-21	1	4.78891E-14	1	2.88657E-15	1	6.10594E-19	1
	GO:0006071	glycerol metabolic process	1.8196E-2	1	3.35869E-2	1		0	2.51816E-2	1
	GO:0006072	glycerol-3-phosphate metabolic process	5.42931E-3	1	8.87406E-3	1	8.91038E-3	1	7.18761E-3	1
	GO:0006073	cellular glucan metabolic process	1.47763E-2	1	1.73431E-3	1	1.04681E-3	1	3.51399E-3	1
	GO:0006081	cellular aldehyde metabolic process	1.21384E-5	1	3.60816E-5	1	3.85145E-5	1	2.06143E-5	1
	GO:0006085	acetyl-CoA biosynthetic process		0	1.5011E-2	1	1.50943E-2	1	1.28583E-2	1
	GO:0006090	pyruvate metabolic process	3.58373E-5	1	9.8714E-5	1	1.04622E-4	1	5.93402E-5	1
	GO:0006094	gluconeogenesis	4.19319E-2	1		0		0		0
	GO:0006096	glycolysis	1.94123E-12	1	1.57268E-11	1	1.93744E-11	1	5.30558E-13	1
	GO:0006099	tricarboxylic acid cycle	1.82319E-3	1	1.2799E-2	1	1.31311E-2	1	8.12792E-3	1
	GO:0006163	purine nucleotide metabolic process	1.73003E-8	1	3.7508E-8	1	1.81916E-8	1	3.21127E-8	1
	GO:0006164	purine nucleotide biosynthetic process	9.28839E-8	1	1.78719E-7	1	9.06227E-8	1	1.61336E-7	1
	GO:0006221	pyrimidine nucleotide biosynthetic process	1.74647E-3	1	7.38486E-4	1	7.57157E-4	1	4.7547E-4	1
	GO:0006261	DNA-dependent DNA replication	9.24474E-4	1	7.9468E-13	1	9.20878E-13	1	7.49774E-11	1
	GO:0006265	DNA topological change	1.61732E-2	1	1.29285E-2	1	1.32481E-2	1	2.25828E-2	1
	GO:0006268	DNA unwinding involved in replication		0	1.46097E-2	1	1.47228E-2	1	1.18643E-2	1
	GO:0006270	DNA-dependent DNA replication initiation		0	5.68628E-4	1	5.80103E-4	1	4.22623E-3	1
	GO:0006275	regulation of DNA replication	1.82319E-3	1	3.38409E-3	1	3.51897E-3	1	2.2073E-4	1
	GO:0006281	DNA repair	4.19467E-22	1	1.48409E-32	1	1.47852E-35	1	2.09304E-33	1
	GO:0006284	base-excision repair	3.58373E-5	1	2.78425E-3	1	1.04622E-4	1	6.14124E-6	1
	GO:0006289	nucleotide-excision repair	1.43069E-4	1	3.92096E-4	1	4.08391E-4	1	2.34157E-4	1
	GO:0006298	mismatch repair	3.98703E-2	1	3.38409E-3	1	3.51897E-3	1	2.57659E-3	1
	GO:0006301	postreplication repair	1.90495E-2	1	2.53143E-2	1	2.55948E-2	1	2.22188E-2	1
	GO:0006302	double-strand break repair	4.50676E-3	1	3.16069E-6	1	3.35013E-6	1	1.8604E-6	1
	GO:0006304	DNA modification		0	1.4908E-2	1	6.33628E-3	1	2.22188E-2	1
	GO:0006306	DNA methylation	4.16518E-2	1	1.98958E-2	1	8.78433E-3	1	1.36335E-2	1
	GO:0006310	DNA recombination	4.55087E-2	1	1.72047E-6	1	1.92895E-6	1	2.25125E-5	1
	GO:0006325	chromatin organization	6.60034E-14	1	2.76377E-18	1	9.78654E-20	1	8.37389E-18	1
	GO:0006333	chromatin assembly or disassembly	1.14159E-4	1	4.92933E-5	1	2.75612E-5	1	5.83972E-5	1
	GO:0006334	nucleosome assembly	3.70214E-6	1	7.51874E-7	1	2.68867E-7	1	1.79144E-6	1
	GO:0006338	chromatin remodeling	3.99497E-3	1	9.89043E-5	1	1.04622E-4	1	6.74831E-5	1
	GO:0006352	transcription initiation, DNA-dependent	1.31562E-5	1	8.44877E-6	1	3.03456E-5	1	9.86986E-5	1
	GO:0006364	rRNA processing	4.11822E-4	1	2.7682E-4	1	5.97226E-4	1	8.89764E-5	1
	GO:0006366	transcription from RNA polymerase II promoter	4.11854E-3	1	5.12419E-3	1	1.21311E-2	1	7.2753E-3	1
	GO:0006379	mRNA cleavage	4.18529E-2	1		0		0	4.87977E-2	1
	GO:0006396	RNA processing	3.13568E-41	1	8.37296E-41	1	6.39931E-40	1	5.62042E-44	1
	GO:0006397	mRNA processing	1.58731E-19	1	9.14334E-19	1	1.14014E-18	1	6.96233E-20	1
	GO:0006401	RNA catabolic process	3.48621E-4	1	7.58012E-4	1	7.68953E-4	1	5.1136E-4	1
	GO:0006402	mRNA catabolic process	3.20796E-3	1	5.45386E-3	1	5.59006E-3	1	4.22623E-3	1
	GO:0006413	translational initiation	4.21084E-9	1	2.76757E-7	1	3.02852E-7	1	3.05317E-7	1
	GO:0006414	translational elongation	1.90495E-2	1	4.74417E-3	1	1.05017E-2	1	2.1156E-2	1
	GO:0006415	translational termination	6.11299E-4	1	7.41986E-3	1	7.60354E-3	1	5.587E-3	1
	GO:0006417	regulation of translation	5.05479E-5	1	1.82079E-4	1	1.93908E-4	1	9.86986E-5	1
	GO:0006446	regulation of translational initiation	4.18529E-2	1		0		0	4.87977E-2	1
	GO:0006457	protein folding	1.05321E-34	1	2.86299E-37	1	8.58518E-40	1	1.15316E-38	1
	GO:0006461	protein complex assembly	7.31098E-13	1	1.73848E-11	1	1.07802E-11	1	1.1934E-11	1
	GO:0006465	signal peptide processing	5.85071E-3	1	8.87406E-3	1	8.83975E-3	1	7.2753E-3	1
	GO:0006470	protein dephosphorylation	3.33289E-9	1	9.75048E-9	1	1.9961E-9	1	1.43392E-8	1
	GO:0006476	protein deacetylation	3.98703E-2	1	3.38409E-3	1	3.51897E-3	1	2.57659E-3	1
	GO:0006486	protein glycosylation	5.58929E-7	1	1.78719E-7	1	1.96095E-7	1	1.58667E-6	1
	GO:0006487	protein N-linked glycosylation	6.11299E-4	1	9.89043E-5	1	1.04622E-4	1	8.72001E-4	1
	GO:0006497	protein lipidation	2.86902E-4	1	2.13711E-5	1	2.28844E-5	1	1.20491E-5	1
	GO:0006505	GPI anchor metabolic process	3.07779E-4	1	7.38486E-4	1	7.57157E-4	1	4.7547E-4	1
	GO:0006519	cellular amino acid metabolic process	5.24258E-18	1	2.46966E-15	1	4.23914E-15	1	9.20564E-18	1
	GO:0006520	cellular amino acid metabolic process	3.79124E-27	1	6.56792E-25	1	3.46333E-24	1	3.04421E-26	1
	GO:0006525	arginine metabolic process	4.62081E-5	1	1.25245E-3	1	1.26072E-3	1	6.74831E-5	1
	GO:0006534	cysteine metabolic process	1.83104E-4	1	2.38564E-3	1	9.133E-3	1	6.74161E-3	1
	GO:0006544	glycine metabolic process	6.99001E-3	1	3.01377E-3	1	3.15007E-3	1	2.1732E-3	1
	GO:0006551	leucine metabolic process	3.98703E-2	1		0		0	4.87977E-2	1
	GO:0006555	methionine metabolic process	4.11854E-3	1	1.17397E-2	1	5.38647E-3	1	7.2753E-3	1
	GO:0006560	proline metabolic process	5.42931E-3	1	8.87406E-3	1	8.91038E-3	1	7.18761E-3	1
	GO:0006563	L-serine metabolic process	8.39043E-5	1	1.19784E-3	1	1.21983E-3	1	3.02665E-3	1
	GO:0006566	threonine metabolic process		0	2.62343E-2	1	2.66135E-2	1	2.22188E-2	1
	GO:0006568	tryptophan metabolic process	1.05039E-3	1	2.38564E-3	1	9.133E-3	1	2.16667E-2	1
	GO:0006570	tyrosine metabolic process	1.90495E-2	1	2.53143E-2	1	2.55948E-2	1	2.22188E-2	1
	GO:0006595	polyamine metabolic process	3.99497E-3	1	2.7461E-2	1	2.81722E-2	1	2.22188E-2	1
	GO:0006596	polyamine biosynthetic process	4.19319E-2	1		0		0		0
	GO:0006605	protein targeting	2.86913E-19	1	8.08509E-17	1	2.65327E-18	1	3.80291E-17	1
	GO:0006606	protein import into nucleus	2.30149E-6	1	1.72047E-6	1	2.50829E-7	1	8.04865E-7	1
	GO:0006612	protein targeting to membrane	3.22065E-4	1	1.0371E-3	1	1.06956E-3	1	5.88189E-4	1
	GO:0006623	protein targeting to vacuole	1.4776E-3	1	1.29061E-2	1	1.31311E-2	1	3.23723E-2	1
	GO:0006625	protein targeting to peroxisome	3.23104E-3	1	5.11584E-3	1	5.20142E-3	1	4.1604E-3	1
	GO:0006626	protein targeting to mitochondrion	2.45912E-3	1	4.74417E-3	1	4.90997E-3	1	3.51399E-3	1
	GO:0006629	lipid metabolic process	1.8813E-11	1	8.37322E-12	1	2.34956E-11	1	2.65684E-11	1
	GO:0006631	fatty acid metabolic process	9.01457E-10	1	2.21706E-15	1	2.73659E-13	1	3.46328E-16	1
	GO:0006633	fatty acid biosynthetic process	3.19919E-6	1	1.03274E-11	1	1.20832E-9	1	1.26727E-11	1
	GO:0006644	phospholipid metabolic process	2.00587E-9	1	2.79512E-8	1	3.24808E-8	1	1.24329E-7	1
	GO:0006665	sphingolipid metabolic process	1.56979E-2	1		0		0		0
	GO:0006694	steroid biosynthetic process	3.58373E-5	1	4.60338E-5	1	7.15953E-6	1	1.62375E-5	1
	GO:0006725	cellular aromatic compound metabolic process	5.95289E-5	1	2.31555E-3	1	4.13217E-4	1	1.70552E-4	1
	GO:0006730	one-carbon metabolic process	4.59994E-10	1	4.19164E-11	1	1.39697E-11	1	9.13717E-11	1
	GO:0006744	ubiquinone biosynthetic process	1.08093E-2	1	1.5011E-2	1	1.50943E-2	1	1.28583E-2	1
	GO:0006760	folic acid-containing compound metabolic process	1.78881E-3	1	4.60767E-3	1	4.82753E-3	1	8.37528E-3	1
	GO:0006772	thiamine metabolic process	1.81045E-3	1	3.01377E-3	1	3.13685E-3	1	2.38303E-3	1
	GO:0006779	porphyrin-containing compound biosynthetic process	3.39907E-10	1	5.01879E-12	1	6.58711E-11	1	1.61662E-10	1
	GO:0006783	heme biosynthetic process	3.23104E-3	1	5.11584E-3	1	5.20142E-3	1	4.1604E-3	1
	GO:0006790	sulfur compound metabolic process	5.90882E-10	1	1.18547E-5	1	5.4074E-5	1	5.2666E-6	1
	GO:0006801	superoxide metabolic process	1.08093E-2	1		0		0	4.87977E-2	1
	GO:0006808	regulation of nitrogen utilization	1.8196E-2	1	1.34225E-2	1	4.67029E-3	1	9.51844E-3	1
	GO:0006811	ion transport	1.82319E-3	1	1.71622E-3	1	5.72242E-4	1	1.89282E-3	1
	GO:0006812	cation transport	1.94254E-3	1	3.78196E-4	1	2.43653E-4	1	4.99388E-4	1
	GO:0006813	potassium ion transport	7.68105E-6	1	6.39758E-7	1	9.65157E-8	1	3.95803E-7	1
	GO:0006816	calcium ion transport		0	4.20298E-2	1	4.34344E-2	1		0
	GO:0006821	chloride transport	1.10468E-2	1		0		0	1.48792E-2	1
	GO:0006839	mitochondrial transport	6.70704E-12	1	1.03798E-13	1	1.19913E-13	1	2.50678E-14	1
	GO:0006862	nucleotide transport		0	1.5011E-2	1	1.50943E-2	1	1.28583E-2	1
	GO:0006886	intracellular protein transport	2.7707E-39	1	5.78064E-38	1	7.66028E-40	1	2.6085E-37	1
	GO:0006887	exocytosis	2.71137E-2	1		0	1.42067E-2	1		0
	GO:0006888	ER to Golgi vesicle-mediated transport	8.3599E-8	1	3.20647E-7	1	3.31569E-7	1	1.76681E-7	1
	GO:0006891	intra-Golgi vesicle-mediated transport	1.75871E-2	1	2.7461E-2	1		0		0
	GO:0006904	vesicle docking involved in exocytosis	2.31088E-2	1		0	2.21902E-2	1		0
	GO:0006913	nucleocytoplasmic transport	2.44426E-12	1	2.45818E-16	1	5.31535E-17	1	2.14918E-17	1
	GO:0006914	autophagy	3.58373E-5	1	9.02163E-5	1	9.70688E-5	1	5.69554E-5	1
	GO:0006915	apoptotic process	5.86095E-4	1		0		0	8.12792E-3	1
	GO:0006944	cellular membrane fusion	2.31088E-2	1	2.14774E-2	1	2.21902E-2	1		0
	GO:0006949	syncytium formation		0		0		0	3.15067E-2	1
	GO:0006952	defense response	3.31472E-10	1	2.08714E-2	1	4.8302E-2	1	2.21014E-4	1
	GO:0006955	immune response	1.13297E-10	1	2.27838E-4	1	8.90762E-4	1	1.61616E-6	1
	GO:0006970	response to osmotic stress	2.09301E-33	1	1.64219E-28	1	9.34175E-28	1	1.17973E-28	1
	GO:0006972	hyperosmotic response	1.14366E-3	1	1.59287E-4	1	1.71208E-4	1	2.6505E-4	1
	GO:0006974	response to DNA damage stimulus	3.22504E-22	1	3.58471E-33	1	4.0734E-36	1	4.63285E-34	1
	GO:0006979	response to oxidative stress	6.93923E-4	1	2.13231E-2	1	2.3497E-2	1	2.28126E-2	1
	GO:0006986	response to unfolded protein	1.90495E-2	1	2.53143E-2	1	2.55948E-2	1	2.22188E-2	1
	GO:0006997	nucleus organization		0	3.63566E-2	1		0		0
	GO:0007005	mitochondrion organization	1.25125E-6	1	4.53194E-6	1	4.80844E-6	1	2.38698E-6	1
	GO:0007010	cytoskeleton organization	9.92447E-4	1	1.33666E-10	1	5.89731E-10	1	3.70801E-8	1
	GO:0007015	actin filament organization	5.02388E-4	1	1.4605E-3	1	4.03398E-4	1	2.1644E-4	1
	GO:0007017	microtubule-based process	8.69971E-4	1	4.13183E-15	1	1.49218E-16	1	6.03205E-12	1
	GO:0007018	microtubule-based movement		0	2.0231E-12	1	2.71422E-14	1	4.14966E-9	1
	GO:0007021	tubulin complex assembly	1.90495E-2	1	2.53143E-2	1	2.55948E-2	1	2.22188E-2	1
	GO:0007030	Golgi organization	3.40156E-2	1	4.30688E-2	1	4.36382E-2	1	3.8361E-2	1
	GO:0007031	peroxisome organization	3.52227E-6	1	1.04869E-5	1	1.09667E-5	1	6.14124E-6	1
	GO:0007034	vacuolar transport	6.09839E-5	1	9.94374E-4	1	1.00741E-3	1	2.88822E-3	1
	GO:0007049	cell cycle	2.21103E-9	1	4.28473E-38	1	1.38779E-41	1	3.17635E-26	1
	GO:0007050	cell cycle arrest		0	1.5011E-2	1	1.50943E-2	1	1.28583E-2	1
	GO:0007059	chromosome segregation	2.86103E-2	1	1.76941E-6	1	1.90329E-6	1	1.051E-6	1
	GO:0007062	sister chromatid cohesion		0	2.53143E-2	1	2.55948E-2	1	2.22188E-2	1
	GO:0007067	mitosis	1.09678E-3	1	1.39524E-8	1	5.16472E-10	1	6.30361E-9	1
	GO:0007126	meiosis	9.56832E-4	1	1.32846E-11	1	1.53809E-11	1	3.12803E-9	1
	GO:0007140	male meiosis		0	2.53143E-2	1	2.55948E-2	1	2.22188E-2	1
	GO:0007155	cell adhesion	1.46339E-2	1		0		0	2.05066E-2	1
	GO:0007166	cell surface receptor signaling pathway	3.47864E-5	1	1.17377E-6	1	3.92441E-6	1	1.03509E-5	1
	GO:0007169	transmembrane receptor protein tyrosine kinase signaling pathway	2.80405E-4	1	4.38329E-5	1	2.28844E-5	1	1.2356E-4	1
	GO:0007186	G-protein coupled receptor signaling pathway	1.68649E-2	1	4.22632E-3	1	1.25663E-2	1	1.28583E-2	1
	GO:0007242	intracellular signal transduction	1.46355E-18	1	7.01644E-18	1	2.54852E-18	1	2.87139E-18	1
	GO:0007243	intracellular protein kinase cascade	1.60359E-2	1	2.3127E-2	1	2.3497E-2	1	1.9709E-2	1
	GO:0007264	small GTPase mediated signal transduction	1.31906E-13	1	4.97172E-15	1	6.52166E-15	1	1.28772E-15	1
	GO:0007346	regulation of mitotic cell cycle		0	1.15262E-2	1	2.1179E-3	1	8.84606E-3	1
	GO:0007389	pattern specification process	4.45236E-2	1	1.64702E-5	1	7.65941E-6	1	3.86368E-3	1
	GO:0007568	aging	2.77903E-2	1		0		0		0
	GO:0007602	phototransduction	3.85194E-9	1	3.79381E-5	1	4.1445E-5	1	1.81691E-5	1
	GO:0007623	circadian rhythm	3.85194E-9	1	8.4136E-6	1	2.60715E-7	1	7.01884E-7	1
	GO:0008033	tRNA processing	5.04789E-9	1	1.01566E-8	1	1.1308E-8	1	3.31752E-9	1
	GO:0008104	protein localization	1.02543E-58	1	5.38479E-56	1	1.79742E-58	1	5.84384E-59	1
	GO:0008154	actin polymerization or depolymerization	2.86103E-2	1	4.90992E-2	1	1.9872E-2	1	1.45044E-2	1
	GO:0008202	steroid metabolic process	1.0696E-5	1	5.17903E-5	1	4.14863E-6	1	1.62559E-5	1
	GO:0008219	cell death	1.70058E-8	1	1.01738E-2	1	1.36092E-2	1	1.00232E-5	1
	GO:0008283	cell proliferation	3.58962E-2	1	1.03674E-3	1	1.07368E-3	1	7.9795E-3	1
	GO:0008361	regulation of cell size	7.27735E-5	1	3.98497E-8	1	4.95455E-8	1	2.11596E-8	1
	GO:0008380	RNA splicing	8.04661E-16	1	1.1284E-15	1	1.27199E-15	1	1.41231E-16	1
	GO:0008544	epidermis development	3.42001E-6	1	1.23062E-7	1	4.04798E-7	1	7.54581E-7	1
	GO:0008610	lipid biosynthetic process	5.3636E-13	1	2.91465E-17	1	5.38356E-16	1	1.11061E-14	1
	GO:0008615	pyridoxine biosynthetic process	1.90495E-2	1	2.53143E-2	1	2.55948E-2	1	2.22188E-2	1
	GO:0008643	carbohydrate transport	2.71174E-2	1		0		0	4.90866E-2	1
	GO:0008652	cellular amino acid biosynthetic process	1.03307E-26	1	1.25824E-22	1	1.79085E-22	1	1.64545E-22	1
	GO:0008654	phospholipid biosynthetic process	4.08367E-12	1	9.79674E-11	1	1.15823E-10	1	1.44027E-10	1
	GO:0009060	aerobic respiration	9.24474E-4	1	7.49245E-3	1	7.80652E-3	1	1.8874E-3	1
	GO:0009062	fatty acid catabolic process	1.42195E-5	1	9.73635E-7	1	1.02565E-6	1	4.82724E-7	1
	GO:0009063	cellular amino acid catabolic process	8.45143E-5	1	2.04233E-5	1	9.70688E-5	1	1.00232E-5	1
	GO:0009067	aspartate family amino acid biosynthetic process	1.99454E-5	1	7.69339E-5	1	1.73755E-5	1	3.98905E-5	1
	GO:0009069	serine family amino acid metabolic process	1.73003E-8	1	1.4363E-7	1	9.25772E-7	1	3.59313E-7	1
	GO:0009072	aromatic amino acid family metabolic process	3.93736E-9	1	6.80235E-9	1	4.73688E-8	1	4.18426E-7	1
	GO:0009073	aromatic amino acid family biosynthetic process	3.85194E-9	1	2.90877E-8	1	3.164E-8	1	1.07141E-7	1
	GO:0009081	branched chain family amino acid metabolic process	5.32965E-3	1	4.60767E-3	1	4.82753E-3	1	8.72001E-4	1
	GO:0009082	branched chain family amino acid biosynthetic process	2.23527E-2	1	1.34954E-2	1	1.3768E-2	1	9.98312E-3	1
	GO:0009105	lipoate biosynthetic process	3.40156E-2	1	4.30688E-2	1	4.36382E-2	1	3.8361E-2	1
	GO:0009107	lipoate biosynthetic process	3.40156E-2	1	4.30688E-2	1	4.36382E-2	1	3.8361E-2	1
	GO:0009116	nucleoside metabolic process	7.43229E-5	1	5.69245E-6	1	1.80812E-6	1	7.33802E-6	1
	GO:0009117	nucleotide metabolic process	7.89887E-20	1	2.96387E-19	1	3.52943E-20	1	2.38964E-19	1
	GO:0009165	nucleotide biosynthetic process	1.42577E-11	1	2.10426E-11	1	1.06355E-11	1	1.34016E-11	1
	GO:0009225	nucleotide-sugar metabolic process	3.59621E-3	1	3.21214E-3	1	3.38716E-3	1	1.35915E-4	1
	GO:0009226	nucleotide-sugar biosynthetic process	5.85071E-3	1	8.87406E-3	1	8.83975E-3	1	7.2753E-3	1
	GO:0009228	thiamine biosynthetic process	5.85071E-3	1	8.87406E-3	1	8.83975E-3	1	7.2753E-3	1
	GO:0009231	riboflavin biosynthetic process	3.23104E-3	1	5.11584E-3	1	5.20142E-3	1	4.1604E-3	1
	GO:0009240	isopentenyl diphosphate biosynthetic process	9.71631E-4	1	1.73431E-3	1	1.75768E-3	1	1.30063E-3	1
	GO:0009247	glycolipid biosynthetic process		0	7.41986E-3	1	7.60354E-3	1		0
	GO:0009250	glucan biosynthetic process	1.22876E-3	1	4.99009E-5	1	7.1932E-6	1	1.25423E-4	1
	GO:0009259	ribonucleotide metabolic process	1.73003E-8	1	3.7508E-8	1	1.81916E-8	1	3.21127E-8	1
	GO:0009266	response to temperature stimulus	4.22523E-29	1	1.00434E-25	1	1.60888E-26	1	7.61556E-35	1
	GO:0009269	response to desiccation	1.10468E-2	1		0		0	4.63095E-2	1
	GO:0009294	DNA mediated transformation	2.43619E-4	1	9.8714E-5	1	1.04622E-4	1	3.88582E-4	1
	GO:0009306	protein secretion	5.02388E-4	1	3.84597E-4	1	4.03398E-4	1	4.346E-5	1
	GO:0009308	amine metabolic process	3.06729E-21	1	1.51234E-18	1	2.53773E-18	1	9.61251E-19	1
	GO:0009314	response to radiation	1.1247E-30	1	1.23379E-30	1	2.30605E-30	1	1.58693E-33	1
	GO:0009396	folic acid-containing compound biosynthetic process	1.56979E-2	1	2.68501E-2	1	2.7439E-2	1		0
	GO:0009408	response to heat	3.93736E-9	1	3.98497E-8	1	1.22283E-9	1	1.85492E-10	1
	GO:0009409	response to cold	1.00248E-20	1	8.04585E-19	1	1.05234E-17	1	4.39573E-25	1
	GO:0009411	response to UV	1.23374E-5	1	1.24154E-9	1	2.18209E-10	1	1.19659E-8	1
	GO:0009414	response to water deprivation	1.82439E-15	1	5.04227E-11	1	1.95834E-10	1	4.96261E-13	1
	GO:0009415	response to water	4.23395E-14	1	6.33618E-10	1	2.16824E-9	1	8.33207E-12	1
	GO:0009416	response to light stimulus	7.42727E-31	1	5.29368E-29	1	2.93985E-28	1	2.75904E-32	1
	GO:0009451	RNA modification	5.52879E-6	1	6.98249E-6	1	7.8696E-6	1	1.77471E-6	1
	GO:0009553	embryo sac development	1.90495E-2	1	3.90512E-5	1	1.1819E-4	1	1.52606E-3	1
	GO:0009555	pollen development		0	6.23748E-4	1	1.62035E-4	1	5.25029E-3	1
	GO:0009561	megagametogenesis		0	4.98367E-2	1		0		0
	GO:0009585	red, far-red light phototransduction	5.72591E-10	1	1.29815E-5	1	1.40927E-5	1	6.22056E-6	1
	GO:0009605	response to external stimulus	1.12638E-17	1	3.54103E-14	1	2.99065E-12	1	2.86535E-16	1
	GO:0009606	tropism	3.58373E-5	1	5.22676E-4	1	5.51269E-4	1	7.01884E-7	1
	GO:0009607	response to biotic stimulus	8.06071E-16	1	5.69475E-10	1	7.26572E-9	1	1.07686E-10	1
	GO:0009611	response to wounding	7.82201E-6	1	2.4373E-6	1	3.30988E-4	1	4.82724E-7	1
	GO:0009612	response to mechanical stimulus	6.50689E-3	1	2.07144E-3	1	2.1179E-3	1	1.50249E-3	1
	GO:0009615	response to virus	3.25659E-5	1	2.56385E-5	1	1.26777E-4	1	1.28876E-5	1
	GO:0009616	virus induced gene silencing	1.90495E-2	1	2.53143E-2	1	2.55948E-2	1	2.22188E-2	1
	GO:0009617	response to bacterium	5.62043E-20	1	5.94671E-10	1	4.19401E-9	1	2.75953E-12	1
	GO:0009620	response to fungus	1.45465E-5	1	6.65824E-3	1	7.24525E-3	1	1.64734E-3	1
	GO:0009624	response to nematode	2.17551E-2	1	3.38409E-3	1	7.80652E-3	1	1.96194E-2	1
	GO:0009626	plant-type hypersensitive response	6.24504E-8	1	1.29815E-5	1	1.40927E-5	1	6.22056E-6	1
	GO:0009627	systemic acquired resistance	3.63329E-2	1	3.0762E-2	1	3.19336E-2	1	4.96526E-2	1
	GO:0009629	response to gravity	7.34632E-4	1	1.82079E-4	1	1.93908E-4	1	2.07669E-5	1
	GO:0009630	gravitropism	7.64942E-4	1	6.59588E-4	1	6.8172E-4	1	8.70135E-5	1
	GO:0009631	cold acclimation	4.40386E-3	1	2.7461E-2	1		0	6.40059E-3	1
	GO:0009637	response to blue light	1.03298E-8	1	4.7085E-5	1	1.78378E-4	1	2.18301E-7	1
	GO:0009638	phototropism	9.71631E-4	1		0		0	1.18643E-2	1
	GO:0009639	response to red or far red light	1.01396E-16	1	1.9381E-15	1	1.37868E-13	1	2.29536E-15	1
	GO:0009640	photomorphogenesis	6.13704E-6	1	1.72047E-6	1	8.48564E-6	1	1.41184E-5	1
	GO:0009641	shade avoidance		0		0		0	3.15067E-2	1
	GO:0009642	response to light intensity	1.68227E-6	1	7.65532E-4	1	3.35862E-4	1	4.77331E-5	1
	GO:0009644	response to high light intensity	4.64213E-4	1	1.01132E-2	1	4.49534E-3	1	8.72001E-4	1
	GO:0009648	photoperiodism	2.19183E-5	1	4.01201E-6	1	7.08028E-7	1	1.74293E-4	1
	GO:0009651	response to salt stress	4.36822E-33	1	7.03417E-28	1	3.14242E-28	1	7.959E-28	1
	GO:0009653	anatomical structure morphogenesis	1.71337E-7	1	2.06432E-16	1	6.31883E-17	1	1.95384E-13	1
	GO:0009657	plastid organization	1.16813E-16	1	4.34605E-17	1	5.31632E-17	1	6.4084E-18	1
	GO:0009658	chloroplast organization	3.52453E-11	1	1.41677E-12	1	3.25393E-11	1	4.47663E-13	1
	GO:0009697	salicylic acid biosynthetic process	3.40156E-2	1		0		0		0
	GO:0009723	response to ethylene stimulus	3.03944E-7	1	2.76006E-7	1	6.59447E-7	1	9.36547E-7	1
	GO:0009725	response to hormone stimulus	4.54569E-14	1	1.05439E-14	1	5.55524E-14	1	3.95533E-14	1
	GO:0009733	response to auxin stimulus	6.08909E-3	1	9.48426E-3	1	8.13621E-3	1	6.54115E-3	1
	GO:0009734	auxin mediated signaling pathway	4.87928E-3	1	4.82087E-4	1	1.21462E-4	1	1.30063E-3	1
	GO:0009735	response to cytokinin stimulus	1.70296E-2	1		0		0		0
	GO:0009737	response to abscisic acid stimulus	8.1464E-12	1	3.23045E-11	1	4.49146E-11	1	2.20717E-11	1
	GO:0009738	abscisic acid mediated signaling pathway	3.53924E-7	1	4.87774E-7	1	1.61361E-7	1	4.67232E-7	1
	GO:0009739	response to gibberellin stimulus	9.49764E-3	1	3.98263E-3	1	2.47273E-3	1	3.23723E-2	1
	GO:0009740	gibberellic acid mediated signaling pathway		0	2.14774E-2	1	2.21902E-2	1		0
	GO:0009741	response to brassinosteroid stimulus	3.07779E-4	1	3.38841E-4	1	3.58715E-4	1	1.74293E-4	1
	GO:0009742	brassinosteroid mediated signaling pathway	2.43619E-4	1	1.04869E-5	1	1.09667E-5	1	6.14124E-6	1
	GO:0009743	response to carbohydrate stimulus	2.15175E-14	1	2.58329E-9	1	8.20651E-9	1	3.81081E-11	1
	GO:0009744	response to sucrose stimulus	2.4696E-3	1	2.20924E-3	1	6.8172E-4	1	3.7421E-4	1
	GO:0009751	response to salicylic acid stimulus	2.03674E-6	1	3.79381E-5	1	4.38399E-5	1	8.99469E-5	1
	GO:0009753	response to jasmonic acid stimulus	7.27735E-5	1	1.51366E-4	1	5.89102E-4	1	5.3567E-4	1
	GO:0009755	hormone-mediated signaling pathway	7.74363E-12	1	5.28404E-14	1	8.11075E-15	1	1.73493E-13	1
	GO:0009765	photosynthesis, light harvesting	8.89969E-8	1	4.53194E-6	1	4.80844E-6	1	2.06153E-7	1
	GO:0009767	photosynthetic electron transport chain	8.69342E-3	1	1.98958E-2	1	2.05515E-2	1	1.36335E-2	1
	GO:0009773	photosynthetic electron transport in photosystem I	2.94976E-4	1	5.68628E-4	1	5.80103E-4	1	4.0003E-4	1
	GO:0009787	regulation of abscisic acid mediated signaling pathway	2.36206E-5	1	1.29815E-5	1	8.56529E-5	1	2.1644E-4	1
	GO:0009790	embryo development	1.10013E-26	1	1.46094E-31	1	4.02985E-33	1	7.00884E-27	1
	GO:0009791	post-embryonic development	2.66662E-35	1	4.77081E-54	1	4.36827E-59	1	1.95003E-43	1
	GO:0009793	embryo development ending in seed dormancy	1.45492E-23	1	5.54428E-29	1	6.20085E-30	1	4.56271E-24	1
	GO:0009814	defense response, incompatible interaction	5.03721E-7	1	4.38329E-5	1	4.98856E-5	1	3.93324E-5	1
	GO:0009816	defense response to bacterium, incompatible interaction	1.14637E-3	1	9.314E-3	1	9.41839E-3	1	6.76933E-3	1
	GO:0009817	defense response to fungus, incompatible interaction	1.98381E-2	1		0		0		0
	GO:0009820	alkaloid metabolic process	2.06125E-7	1	2.45564E-5	1	1.85565E-6	1	1.04606E-5	1
	GO:0009826	unidimensional cell growth		0	2.21972E-3	1	2.4697E-3	1	1.30063E-3	1
	GO:0009845	seed germination	2.86985E-4	1	1.72114E-4	1	6.12475E-5	1	6.90273E-6	1
	GO:0009846	pollen germination	2.9483E-3	1	6.43921E-3	1	6.66224E-3	1	4.42795E-3	1
	GO:0009850	auxin metabolic process		0	2.58322E-2	1	2.66135E-2	1	3.87431E-2	1
	GO:0009853	photorespiration	3.45839E-9	1	1.72047E-6	1	1.88987E-6	1	9.74129E-9	1
	GO:0009862	systemic acquired resistance, salicylic acid mediated signaling pathway	9.32933E-3	1	1.46097E-2	1	1.47228E-2	1	1.18643E-2	1
	GO:0009863	salicylic acid mediated signaling pathway	2.55072E-2	1	1.8885E-2	1	1.93252E-2	1	3.49218E-2	1
	GO:0009867	jasmonic acid mediated signaling pathway	6.27459E-5	1	8.99394E-4	1	2.09473E-4	1	5.24833E-4	1
	GO:0009873	ethylene mediated signaling pathway	3.34474E-3	1	2.98987E-3	1	7.80652E-3	1	2.7494E-3	1
	GO:0009887	organ morphogenesis	5.16539E-5	1	1.03948E-8	1	1.26053E-8	1	4.1674E-6	1
	GO:0009892	negative regulation of metabolic process	3.48139E-12	1	6.39676E-15	1	8.17622E-15	1	7.20769E-13	1
	GO:0009902	chloroplast relocation		0	2.53143E-2	1	2.55948E-2	1	2.22188E-2	1
	GO:0009908	flower development	8.6235E-6	1	2.34794E-15	1	4.88039E-19	1	4.66398E-10	1
	GO:0009909	regulation of flower development	6.96956E-8	1	7.91407E-12	1	9.77812E-12	1	6.1323E-9	1
	GO:0009910	negative regulation of flower development	1.18279E-4	1	1.29815E-5	1	8.56529E-5	1	4.346E-5	1
	GO:0009911	positive regulation of flower development	4.95267E-2	1	2.03334E-3	1	5.24927E-4	1	3.18827E-2	1
	GO:0009913	epidermal cell differentiation	2.66891E-6	1	8.28725E-8	1	8.37802E-7	1	5.59121E-7	1
	GO:0009926	auxin polar transport		0	1.2799E-2	1	1.31311E-2	1		0
	GO:0009932	cell tip growth		0		0		0	4.56516E-2	1
	GO:0009933	meristem structural organization	7.54068E-3	1	3.94447E-7	1	4.2457E-8	1	8.02944E-6	1
	GO:0009934	regulation of meristem structural organization		0	4.74417E-3	1	4.90997E-3	1	3.51399E-3	1
	GO:0009942	longitudinal axis specification		0	2.7461E-2	1	8.78175E-3	1		0
	GO:0009956	radial pattern formation	3.40156E-2	1	4.30688E-2	1	4.36382E-2	1	3.8361E-2	1
	GO:0009958	positive gravitropism	2.71174E-2	1	4.08276E-2	1	4.15982E-2	1	3.35491E-2	1
	GO:0009959	negative gravitropism	1.90495E-2	1	2.53143E-2	1	2.55948E-2	1	2.22188E-2	1
	GO:0009965	leaf morphogenesis	5.39578E-6	1	3.04688E-6	1	3.43944E-6	1	7.1115E-6	1
	GO:0009966	regulation of signal transduction	3.80518E-15	1	6.90348E-18	1	6.31883E-17	1	1.43928E-15	1
	GO:0009968	negative regulation of signal transduction	8.39043E-5	1	2.79643E-6	1	1.73755E-5	1	5.91086E-4	1
	GO:0010014	meristem initiation		0		0	1.50943E-2	1		0
	GO:0010015	root morphogenesis	9.24474E-4	1	5.45349E-4	1	2.51993E-4	1	5.00875E-4	1
	GO:0010016	shoot morphogenesis	1.92435E-6	1	9.24166E-10	1	1.14095E-9	1	7.21496E-7	1
	GO:0010017	red or far-red light signaling pathway	2.19447E-11	1	2.56868E-5	1	2.85466E-5	1	1.68559E-7	1
	GO:0010020	chloroplast fission	3.23104E-3	1	5.11584E-3	1	5.20142E-3	1	4.1604E-3	1
	GO:0010027	thylakoid membrane organization	6.11299E-4	1	1.25245E-3	1	1.26072E-3	1	8.72001E-4	1
	GO:0010029	regulation of seed germination	1.14637E-3	1	2.78425E-3	1	6.47426E-4	1	3.88582E-4	1
	GO:0010038	response to metal ion	7.21485E-41	1	1.79519E-33	1	6.80892E-34	1	6.77237E-35	1
	GO:0010039	response to iron ion	4.18529E-2	1		0		0	4.87977E-2	1
	GO:0010050	vegetative phase change		0	5.11584E-3	1	5.20142E-3	1	4.1604E-3	1
	GO:0010051	xylem and phloem pattern formation		0	1.82079E-4	1	1.93908E-4	1	3.95413E-3	1
	GO:0010073	meristem maintenance	3.81081E-2	1	3.33165E-6	1	3.60252E-6	1	3.1509E-3	1
	GO:0010074	maintenance of meristem identity		0	4.5411E-4	1	4.6656E-4	1	3.23723E-2	1
	GO:0010075	regulation of meristem growth		0	1.29061E-2	1	1.31311E-2	1	3.23723E-2	1
	GO:0010099	regulation of photomorphogenesis	2.94976E-4	1	5.68628E-4	1	5.80103E-4	1	4.0003E-4	1
	GO:0010100	negative regulation of photomorphogenesis	1.08093E-2	1	1.5011E-2	1	1.50943E-2	1	1.28583E-2	1
	GO:0010103	stomatal complex morphogenesis		0	1.7632E-2	1		0		0
	GO:0010104	regulation of ethylene mediated signaling pathway	5.35783E-4	1	9.96504E-4	1	1.00741E-3	1	7.21478E-4	1
	GO:0010109	regulation of photosynthesis	1.05654E-3	1	2.07144E-3	1	2.1179E-3	1	1.50249E-3	1
	GO:0010114	response to red light	1.52806E-5	1	7.60058E-5	1	7.68953E-4	1	3.71772E-4	1
	GO:0010118	stomatal movement	8.45143E-5	1	8.92965E-5	1	9.70688E-5	1	4.48029E-5	1
	GO:0010119	regulation of stomatal movement	3.91046E-4	1	1.64493E-4	1	1.72681E-4	1	9.98987E-5	1
	GO:0010149	senescence	1.61732E-2	1		0		0	4.96526E-2	1
	GO:0010150	leaf senescence	2.86103E-2	1		0		0		0
	GO:0010152	pollen maturation	2.59931E-2	1	5.11584E-3	1	5.20142E-3	1	4.1604E-3	1
	GO:0010154	fruit development	2.49437E-25	1	3.07099E-29	1	1.53539E-30	1	3.06358E-25	1
	GO:0010161	red light signaling pathway	1.90495E-2	1		0		0		0
	GO:0010166	wax metabolic process		0	4.13617E-2	1	4.23391E-2	1	3.35491E-2	1
	GO:0010182	sugar mediated signaling pathway	2.9483E-3	1	1.82261E-3	1	1.87944E-3	1	2.34157E-4	1
	GO:0010188	response to microbial phytotoxin	3.40156E-2	1		0		0		0
	GO:0010189	vitamin E biosynthetic process	1.90495E-2	1	2.53143E-2	1	2.55948E-2	1	2.22188E-2	1
	GO:0010190	cytochrome b6f complex assembly	3.40156E-2	1	4.30688E-2	1	4.36382E-2	1	3.8361E-2	1
	GO:0010193	response to ozone	1.82319E-3	1	4.18503E-3	1	4.36723E-3	1	9.891E-3	1
	GO:0010200	response to chitin	2.43372E-9	1	2.10398E-4	1	2.36082E-4	1	1.36223E-5	1
	GO:0010205	photoinhibition	1.90495E-2	1	2.53143E-2	1	2.55948E-2	1	2.22188E-2	1
	GO:0010207	photosystem II assembly	5.85071E-3	1	8.87406E-3	1	8.83975E-3	1	7.2753E-3	1
	GO:0010212	response to ionizing radiation		0	8.87406E-3	1	1.00741E-3	1	3.35491E-2	1
	GO:0010218	response to far red light	5.36956E-5	1	1.02828E-5	1	5.4074E-5	1	2.47144E-5	1
	GO:0010223	secondary shoot formation		0	3.63566E-2	1	3.71858E-2	1		0
	GO:0010224	response to UV-B	8.80353E-4	1	9.80038E-7	1	1.60902E-7	1	1.16511E-5	1
	GO:0010228	vegetative to reproductive phase transition of meristem	3.90517E-8	1	7.67695E-10	1	1.33612E-10	1	6.15636E-7	1
	GO:0010229	inflorescence development		0	3.63566E-2	1	5.20142E-3	1		0
	GO:0010260	organ senescence	4.92971E-2	1		0		0		0
	GO:0010286	heat acclimation	2.65691E-2	1		0	4.23391E-2	1	8.84606E-3	1
	GO:0010304	PSII associated light-harvesting complex II catabolic process		0	4.30688E-2	1	4.36382E-2	1	3.8361E-2	1
	GO:0010305	leaf vascular tissue pattern formation		0	4.13617E-2	1	4.23391E-2	1		0
	GO:0010332	response to gamma radiation		0		0	8.83975E-3	1		0
	GO:0010374	stomatal complex development		0	6.12725E-3	1	1.9872E-2	1	3.8361E-2	1
	GO:0010380	regulation of chlorophyll biosynthetic process	4.18529E-2	1	8.87406E-3	1		0	4.87977E-2	1
	GO:0010387	signalosome assembly	3.40156E-2	1	4.30688E-2	1	4.36382E-2	1	3.8361E-2	1
	GO:0010440	stomatal lineage progression		0	4.30688E-2	1	4.36382E-2	1	3.8361E-2	1
	GO:0010476	gibberellin mediated signaling pathway		0	2.14774E-2	1	2.21902E-2	1		0
	GO:0010498	proteasomal protein catabolic process	3.99497E-3	1	1.25245E-3	1	1.26072E-3	1	5.587E-3	1
	GO:0010540	basipetal auxin transport	1.90495E-2	1	2.53143E-2	1	2.55948E-2	1	2.22188E-2	1
	GO:0010586	miRNA metabolic process	3.40156E-2	1	4.30688E-2	1	4.36382E-2	1	3.8361E-2	1
	GO:0010628	positive regulation of gene expression	2.35908E-5	1	4.53916E-7	1	2.34039E-6	1	1.76681E-7	1
	GO:0012501	programmed cell death	3.10247E-8	1	1.22724E-2	1	1.58801E-2	1	5.35744E-6	1
	GO:0015031	protein transport	8.95983E-57	1	2.04312E-54	1	3.48722E-56	1	1.60127E-56	1
	GO:0015780	nucleotide-sugar transport	1.08093E-2	1	1.5011E-2	1	1.50943E-2	1	1.28583E-2	1
	GO:0015865	purine nucleotide transport		0	2.53143E-2	1	2.55948E-2	1	2.22188E-2	1
	GO:0015914	phospholipid transport	1.75871E-2	1		0	2.66135E-2	1		0
	GO:0015931	nucleobase-containing compound transport	3.61428E-3	1	2.03087E-3	1	5.17286E-3	1	2.79473E-2	1
	GO:0015936	coenzyme A metabolic process	9.32933E-3	1	1.73431E-3	1	1.75768E-3	1	1.18643E-2	1
	GO:0015977	carbon fixation	2.23527E-2	1	1.34954E-2	1	3.98671E-2	1	9.98312E-3	1
	GO:0015979	photosynthesis	1.47302E-12	1	2.64848E-10	1	5.95946E-9	1	9.41282E-12	1
	GO:0015992	proton transport	3.86994E-3	1	4.41013E-3	1	4.82753E-3	1	1.00481E-3	1
	GO:0015994	chlorophyll metabolic process	1.80312E-12	1	1.73475E-12	1	2.94601E-11	1	8.0397E-12	1
	GO:0015995	chlorophyll biosynthetic process	3.85194E-9	1	1.3972E-10	1	2.68254E-9	1	9.54787E-10	1
	GO:0015996	chlorophyll catabolic process	3.23104E-3	1	3.63566E-2	1	3.71858E-2	1	3.15067E-2	1
	GO:0016049	cell growth	2.08717E-4	1	2.80892E-7	1	3.34654E-7	1	1.61388E-7	1
	GO:0016051	carbohydrate biosynthetic process	5.89357E-11	1	4.51593E-10	1	1.28409E-9	1	1.569E-9	1
	GO:0016052	carbohydrate catabolic process	1.39223E-6	1	1.78719E-7	1	2.19334E-7	1	4.75913E-8	1
	GO:0016071	mRNA metabolic process	4.70565E-24	1	4.70775E-23	1	6.26754E-23	1	2.35876E-24	1
	GO:0016116	carotenoid metabolic process	1.82319E-3	1	1.34473E-3	1	1.37353E-3	1	8.95525E-3	1
	GO:0016125	sterol metabolic process	7.27735E-5	1	9.93856E-4	1	1.00741E-3	1	1.35915E-4	1
	GO:0016126	sterol biosynthetic process	3.07779E-4	1	3.16025E-3	1	3.33777E-3	1	5.24833E-4	1
	GO:0016192	vesicle-mediated transport	1.11868E-27	1	1.60856E-25	1	9.0351E-28	1	4.56271E-24	1
	GO:0016226	iron-sulfur cluster assembly	1.08538E-2	1		0		0	4.20804E-2	1
	GO:0016311	dephosphorylation	4.82055E-11	1	1.19217E-9	1	2.80678E-10	1	2.75552E-10	1
	GO:0016441	posttranscriptional gene silencing	2.51004E-4	1	3.02017E-5	1	3.42118E-5	1	3.27473E-4	1
	GO:0016458	gene silencing	4.18921E-5	1	4.93783E-7	1	5.61836E-7	1	1.34949E-5	1
	GO:0016481	negative regulation of transcription, DNA-dependent	9.99358E-6	1	9.03707E-7	1	9.77085E-7	1	1.58667E-6	1
	GO:0016485	protein processing	1.74647E-3	1	3.67885E-3	1	3.82988E-3	1	2.60162E-3	1
	GO:0016559	peroxisome fission	5.85071E-3	1	8.87406E-3	1	8.83975E-3	1	7.2753E-3	1
	GO:0016568	chromatin modification	3.85694E-13	1	7.29865E-20	1	1.08031E-21	1	3.06265E-19	1
	GO:0016570	histone modification	1.5279E-5	1	7.56098E-11	1	8.68857E-11	1	2.65355E-10	1
	GO:0017038	protein import	6.71732E-14	1	2.3873E-13	1	2.71422E-14	1	4.82354E-14	1
	GO:0018298	protein-chromophore linkage	7.31572E-4	1	1.82261E-3	1	1.87944E-3	1	1.17937E-3	1
	GO:0019058	viral infectious cycle	3.98703E-2	1		0		0		0
	GO:0019252	starch biosynthetic process	1.10468E-2	1	7.58012E-4	1	7.68953E-4	1	3.51399E-3	1
	GO:0019253	reductive pentose-phosphate cycle	3.20796E-3	1	5.45386E-3	1	2.66135E-2	1	4.22623E-3	1
	GO:0019288	isopentenyl diphosphate biosynthetic process, mevalonate-independent pathway	5.85071E-3	1	8.87406E-3	1	8.83975E-3	1	7.2753E-3	1
	GO:0019318	hexose metabolic process	1.07688E-18	1	2.76377E-18	1	8.57911E-19	1	5.02134E-21	1
	GO:0019320	hexose catabolic process	5.97652E-15	1	2.84802E-14	1	6.73228E-15	1	5.80476E-16	1
	GO:0019363	pyridine nucleotide biosynthetic process	1.81045E-3	1	3.01377E-3	1	3.13685E-3	1	2.38303E-3	1
	GO:0019395	fatty acid oxidation	3.83683E-5	1	2.70681E-6	1	2.89461E-6	1	1.43011E-6	1
	GO:0019563	glycerol catabolic process	3.40156E-2	1	4.30688E-2	1	4.36382E-2	1	3.8361E-2	1
	GO:0019684	photosynthesis, light reaction	2.648E-8	1	1.53902E-6	1	1.76644E-6	1	1.44622E-7	1
	GO:0019685	photosynthesis, dark reaction	1.82319E-3	1	3.38409E-3	1	1.78256E-2	1	2.57659E-3	1
	GO:0019725	cellular homeostasis	2.32281E-6	1	6.88643E-7	1	9.57608E-8	1	1.46735E-6	1
	GO:0019752	carboxylic acid metabolic process	1.12362E-43	1	1.75583E-44	1	2.74286E-41	1	3.5616E-45	1
	GO:0019827	stem cell maintenance		0	1.55472E-3	1	1.58236E-3	1	3.8361E-2	1
	GO:0019856	pyrimidine base biosynthetic process	1.90495E-2	1	2.53143E-2	1	2.55948E-2	1	2.22188E-2	1
	GO:0019941	modification-dependent protein catabolic process	2.41546E-30	1	7.92675E-30	1	1.41406E-29	1	1.30148E-28	1
	GO:0022621	shoot system development	1.47744E-8	1	2.46966E-15	1	3.95623E-16	1	1.14757E-11	1
	GO:0022900	electron transport chain	4.91606E-2	1		0		0		0
	GO:0030001	metal ion transport	8.47607E-3	1	1.5782E-3	1	9.21609E-4	1	4.24691E-3	1
	GO:0030029	actin filament-based process	1.55581E-4	1	1.74457E-8	1	8.2834E-8	1	2.11596E-8	1
	GO:0030036	actin cytoskeleton organization	7.02655E-3	1	1.73791E-5	1	6.24717E-5	1	2.39783E-5	1
	GO:0030041	actin filament polymerization	1.68893E-2	1	2.7461E-2	1	8.78175E-3	1	6.40059E-3	1
	GO:0030048	actin filament-based movement	1.75871E-2	1	1.25245E-3	1	1.26072E-3	1	8.72001E-4	1
	GO:0030154	cell differentiation	2.59138E-4	1	1.28535E-7	1	4.41531E-8	1	1.43608E-7	1
	GO:0030261	chromosome condensation		0	4.30688E-2	1	4.36382E-2	1	3.8361E-2	1
	GO:0030865	cortical cytoskeleton organization		0	3.63566E-2	1	3.71858E-2	1	3.15067E-2	1
	GO:0030968	endoplasmic reticulum unfolded protein response	3.40156E-2	1	4.30688E-2	1	4.36382E-2	1	3.8361E-2	1
	GO:0031047	gene silencing by RNA	3.87753E-4	1	5.33301E-5	1	6.12475E-5	1	5.15323E-4	1
	GO:0031123	RNA 3'-end processing	2.71174E-2	1	4.08276E-2	1	4.15982E-2	1	3.35491E-2	1
	GO:0031347	regulation of defense response	8.95034E-8	1	1.30246E-7	1	7.73681E-7	1	4.93688E-8	1
	GO:0031348	negative regulation of defense response	1.82319E-3	1	3.38409E-3	1	3.51897E-3	1	2.2073E-4	1
	GO:0031365	N-terminal protein amino acid modification		0	2.3127E-2	1	2.3497E-2	1	1.9709E-2	1
	GO:0031407	oxylipin metabolic process	1.10468E-2	1	2.3127E-2	1		0	1.67804E-2	1
	GO:0032259	methylation	8.29503E-10	1	1.23343E-11	1	2.86829E-12	1	6.11022E-11	1
	GO:0032268	regulation of cellular protein metabolic process	5.86416E-7	1	1.59434E-5	1	1.73475E-5	1	1.50572E-6	1
	GO:0032324	molybdopterin cofactor biosynthetic process	1.08093E-2	1	1.5011E-2	1	1.50943E-2	1	1.28583E-2	1
	GO:0032508	DNA duplex unwinding		0	3.38409E-3	1	3.51897E-3	1	2.57659E-3	1
	GO:0032940	secretion by cell	3.16564E-4	1	7.28648E-4	1	1.21462E-4	1	1.24334E-4	1
	GO:0032957	inositol trisphosphate metabolic process	1.90495E-2	1		0		0	2.22188E-2	1
	GO:0033014	tetrapyrrole biosynthetic process	1.64738E-10	1	3.16523E-13	1	4.77752E-12	1	9.33259E-11	1
	GO:0033044	regulation of chromosome organization	1.08093E-2	1	1.5011E-2	1	1.50943E-2	1	1.28583E-2	1
	GO:0034050	host programmed cell death induced by symbiont	3.52442E-8	1	8.4136E-6	1	8.91322E-6	1	3.92726E-6	1
	GO:0034613	cellular protein localization	2.93584E-40	1	1.05391E-38	1	2.74286E-41	1	7.72642E-39	1
	GO:0034620	cellular response to unfolded protein	1.90495E-2	1	2.53143E-2	1	2.55948E-2	1	2.22188E-2	1
	GO:0034976	response to endoplasmic reticulum stress	2.94976E-4	1	5.68628E-4	1	5.80103E-4	1	4.0003E-4	1
	GO:0035265	organ growth	5.85071E-3	1	8.87406E-3	1	8.83975E-3	1	7.2753E-3	1
	GO:0035266	meristem growth		0	8.68984E-3	1	8.78175E-3	1	2.22188E-2	1
	GO:0040008	regulation of growth	2.1224E-4	1	1.72047E-6	1	1.88987E-6	1	2.47144E-5	1
	GO:0040029	regulation of gene expression, epigenetic	1.22053E-7	1	2.84014E-9	1	1.20832E-9	1	2.59227E-8	1
	GO:0040034	regulation of development, heterochronic		0	4.90992E-2	1		0		0
	GO:0042023	DNA endoreduplication	3.91046E-4	1	1.01151E-6	1	1.06386E-6	1	1.06302E-5	1
	GO:0042127	regulation of cell proliferation		0	1.94633E-2	1	1.9872E-2	1		0
	GO:0042128	nitrate assimilation	1.82319E-3	1	1.7632E-2	1	3.51897E-3	1	2.57659E-3	1
	GO:0042147	retrograde transport, endosome to Golgi	1.90495E-2	1	2.53143E-2	1	2.55948E-2	1	2.22188E-2	1
	GO:0042176	regulation of protein catabolic process	3.40156E-2	1	4.30688E-2	1	4.36382E-2	1	3.8361E-2	1
	GO:0042254	ribosome biogenesis	5.62043E-20	1	2.2804E-19	1	1.14014E-18	1	5.2491E-21	1
	GO:0042309	homoiothermy		0	4.77756E-3	1	5.15369E-3	1	2.47642E-3	1
	GO:0042325	regulation of phosphorylation	6.15222E-6	1	2.33196E-7	1	2.48343E-7	1	1.43011E-6	1
	GO:0042362	fat-soluble vitamin biosynthetic process	5.42931E-3	1	8.87406E-3	1	8.91038E-3	1	7.18761E-3	1
	GO:0042538	hyperosmotic salinity response	5.40981E-3	1	7.38486E-4	1	7.68953E-4	1	1.30063E-3	1
	GO:0042548	regulation of photosynthesis, light reaction	3.20796E-3	1	5.45386E-3	1	5.59006E-3	1	4.22623E-3	1
	GO:0042742	defense response to bacterium	5.38765E-24	1	1.11675E-12	1	1.53809E-11	1	2.7122E-14	1
	GO:0042752	regulation of circadian rhythm	6.11299E-4	1	1.25245E-3	1	1.26072E-3	1	8.72001E-4	1
	GO:0042819	vitamin B6 biosynthetic process	1.90495E-2	1	2.53143E-2	1	2.55948E-2	1	2.22188E-2	1
	GO:0042981	regulation of apoptotic process	2.65691E-2	1	4.13617E-2	1		0	3.35491E-2	1
	GO:0043039	tRNA aminoacylation	5.60053E-3	1	3.38409E-3	1	3.62622E-3	1	3.37397E-3	1
	GO:0043067	regulation of programmed cell death	4.53628E-4	1	2.42341E-4	1	1.21983E-3	1	1.44234E-4	1
	GO:0043069	negative regulation of programmed cell death		0	4.08276E-2	1	4.15982E-2	1	3.35491E-2	1
	GO:0043085	positive regulation of catalytic activity	6.85955E-6	1	2.03015E-6	1	2.1864E-6	1	1.20491E-5	1
	GO:0043087	regulation of GTPase activity	2.05115E-7	1	2.33196E-7	1	2.50829E-7	1	9.77483E-8	1
	GO:0043241	protein complex disassembly	5.05479E-5	1	7.71106E-4	1	1.59631E-4	1	8.8782E-5	1
	GO:0043254	regulation of protein complex assembly		0		0	4.15982E-2	1	3.23723E-2	1
	GO:0043269	regulation of ion transport	4.18529E-2	1	8.87406E-3	1	8.83975E-3	1	4.87977E-2	1
	GO:0043572	plastid fission	5.35783E-4	1	9.96504E-4	1	1.00741E-3	1	7.21478E-4	1
	GO:0043622	cortical microtubule organization		0		0		0	4.87977E-2	1
	GO:0044262	cellular carbohydrate metabolic process	4.14032E-19	1	1.1107E-17	1	1.94544E-16	1	1.66058E-18	1
	GO:0045010	actin nucleation	3.23104E-3	1	5.11584E-3	1	5.20142E-3	1	4.1604E-3	1
	GO:0045017	glycerolipid biosynthetic process	8.89969E-8	1	1.71009E-8	1	1.81916E-8	1	2.06153E-7	1
	GO:0045036	protein targeting to chloroplast	6.27459E-5	1	1.55177E-4	1	1.05169E-5	1	9.86986E-5	1
	GO:0045087	innate immune response	1.42218E-8	1	1.00184E-2	1	1.11499E-2	1	1.66766E-4	1
	GO:0045132	meiotic chromosome segregation		0	1.5011E-2	1	1.50943E-2	1	1.28583E-2	1
	GO:0045185	maintenance of protein location	3.20796E-3	1	5.45386E-3	1	5.59006E-3	1	4.22623E-3	1
	GO:0045226	extracellular polysaccharide biosynthetic process	7.31572E-4	1	3.92096E-4	1	4.08391E-4	1	1.17937E-3	1
	GO:0045454	cell redox homeostasis	4.66011E-6	1	1.58541E-6	1	3.02852E-7	1	4.54153E-6	1
	GO:0045489	pectin biosynthetic process	4.18529E-2	1		0		0		0
	GO:0045786	negative regulation of cell cycle		0	3.63566E-2	1	5.20142E-3	1	3.15067E-2	1
	GO:0045793	positive regulation of cell size	3.40156E-2	1	4.30688E-2	1	4.36382E-2	1	3.8361E-2	1
	GO:0045814	negative regulation of gene expression, epigenetic		0	1.19141E-3	1	1.20863E-3	1	7.89938E-4	1
	GO:0045941	positive regulation of transcription, DNA-dependent	3.58373E-5	1	7.17564E-7	1	3.59378E-6	1	2.87517E-7	1
	GO:0046486	glycerolipid metabolic process	2.58146E-6	1	1.86721E-5	1	2.07949E-5	1	2.31876E-5	1
	GO:0046489	phosphatidylinositol biosynthetic process	3.58373E-5	1	5.68691E-6	1	5.91287E-6	1	5.69554E-5	1
	GO:0046653	tetrahydrofolate metabolic process	4.18529E-2	1		0		0	4.87977E-2	1
	GO:0046686	response to cadmium ion	4.36705E-46	1	3.31924E-37	1	1.01973E-37	1	1.21299E-39	1
	GO:0046907	intracellular transport	2.80009E-59	1	1.18352E-60	1	1.00702E-62	1	1.12141E-60	1
	GO:0048015	phosphatidylinositol-mediated signaling		0	1.5011E-2	1	1.50943E-2	1		0
	GO:0048193	Golgi vesicle transport	6.60545E-13	1	1.16265E-11	1	1.28551E-10	1	2.65355E-10	1
	GO:0048229	gametophyte development	2.4232E-2	1	4.39968E-6	1	2.43592E-6	1	3.65416E-4	1
	GO:0048278	vesicle docking	1.72979E-2	1		0	1.61411E-2	1		0
	GO:0048316	seed development	4.8907E-23	1	4.20164E-27	1	2.10486E-28	1	4.33842E-23	1
	GO:0048364	root development	3.58382E-5	1	9.13222E-8	1	1.81916E-8	1	1.76123E-6	1
	GO:0048366	leaf development	2.34679E-10	1	7.8748E-14	1	2.69552E-14	1	6.45024E-15	1
	GO:0048367	shoot development	1.70058E-8	1	2.46966E-15	1	3.95623E-16	1	1.23763E-11	1
	GO:0048437	floral organ development		0	2.48429E-2	1	3.84356E-3	1		0
	GO:0048438	floral whorl development		0	4.69575E-2	1	7.77527E-3	1		0
	GO:0048440	carpel development		0		0	3.71858E-2	1		0
	GO:0048467	gynoecium development		0	2.83895E-2	1	7.80652E-3	1		0
	GO:0048507	meristem development	1.00931E-4	1	3.89363E-13	1	8.27335E-14	1	2.88625E-8	1
	GO:0048509	regulation of meristem development	2.2537E-2	1	2.82367E-5	1	3.08674E-5	1	1.78562E-4	1
	GO:0048513	organ development	9.81592E-10	1	9.84597E-23	1	2.33109E-24	1	2.55336E-15	1
	GO:0048528	post-embryonic root development		0		0	2.05729E-2	1		0
	GO:0048569	post-embryonic organ development		0	2.07989E-2	1	3.14681E-3	1		0
	GO:0048573	photoperiodism, flowering	1.99454E-5	1	1.61647E-5	1	3.01947E-6	1	5.91086E-4	1
	GO:0048574	long-day photoperiodism, flowering	2.59931E-2	1		0	3.71858E-2	1		0
	GO:0048589	developmental growth	1.5325E-3	1	1.96273E-6	1	2.35973E-6	1	1.42956E-6	1
	GO:0048638	regulation of developmental growth	9.48448E-3	1	3.92096E-4	1	4.08391E-4	1	1.17937E-3	1
	GO:0048645	organ formation		0	2.3127E-2	1	2.38376E-2	1		0
	GO:0048825	cotyledon development		0	1.8885E-2	1	6.66224E-3	1		0
	GO:0048827	phyllome development	6.90945E-9	1	5.28404E-14	1	5.72789E-15	1	4.96261E-13	1
	GO:0048864	stem cell development		0	9.94374E-4	1	1.00741E-3	1	2.79405E-2	1
	GO:0048868	pollen tube development		0		0		0	4.75651E-2	1
	GO:0050790	regulation of catalytic activity	1.89098E-5	1	7.53832E-7	1	2.02657E-6	1	1.94566E-6	1
	GO:0050826	response to freezing	2.93958E-2	1	4.20562E-3	1	4.55168E-3	1	4.5225E-4	1
	GO:0050832	defense response to fungus	2.89869E-3	1		0		0	4.87977E-2	1
	GO:0051028	mRNA transport	1.58967E-4	1	3.23045E-4	1	3.32803E-4	1	2.2073E-4	1
	GO:0051170	nuclear import	1.36591E-6	1	1.0636E-6	1	1.53518E-7	1	4.85876E-7	1
	GO:0051246	regulation of protein metabolic process	2.62316E-13	1	2.63428E-10	1	1.55619E-11	1	2.28427E-12	1
	GO:0051258	protein polymerization	5.31653E-6	1	9.80038E-7	1	1.60902E-7	1	2.38698E-6	1
	GO:0051276	chromosome organization	1.81663E-16	1	2.80671E-24	1	6.80518E-26	1	2.38566E-23	1
	GO:0051301	cell division	3.63246E-7	1	2.63317E-28	1	3.95687E-30	1	4.96402E-19	1
	GO:0051302	regulation of cell division		0	1.7632E-2	1	1.78256E-2	1	4.87977E-2	1
	GO:0051347	positive regulation of transferase activity	6.50689E-3	1	2.07144E-3	1	2.1179E-3	1	8.84606E-3	1
	GO:0051603	proteolysis involved in cellular protein catabolic process	5.78133E-31	1	1.84495E-30	1	3.64787E-30	1	3.14255E-29	1
	GO:0051605	protein processing	9.71631E-4	1	1.73431E-3	1	1.75768E-3	1	1.30063E-3	1
	GO:0051607	defense response to virus	3.07779E-4	1	9.02163E-5	1	3.82988E-3	1	5.69554E-5	1
	GO:0051641	cellular localization	1.55548E-67	1	7.486E-66	1	2.12484E-68	1	1.19532E-67	1
	GO:0051707	response to other organism	6.13957E-20	1	1.20424E-13	1	3.08431E-12	1	2.80666E-14	1
	GO:0051726	regulation of cell cycle	3.4081E-3	1	7.47929E-15	1	1.65442E-16	1	5.69176E-10	1
	GO:0052386	cell wall thickening	1.38109E-5	1	1.29061E-2	1	4.15982E-2	1	9.76124E-3	1
	GO:0052542	defense response by callose deposition	3.48621E-4	1	1.92102E-2	1		0	1.48792E-2	1
	GO:0052543	callose deposition in cell wall	2.53373E-5	1	1.92102E-2	1		0	1.48792E-2	1
	GO:0052544	defense response by callose deposition in cell wall	8.39043E-5	1	4.13617E-2	1		0	3.35491E-2	1
	GO:0055085	transmembrane transport	6.04174E-3	1		0	3.29945E-2	1	1.89714E-3	1
	GO:0065002	intracellular protein transmembrane transport	2.53373E-5	1	5.55494E-5	1	6.00578E-5	1	3.75772E-5	1
	GO:0080010	regulation of oxygen and reactive oxygen species metabolic process	3.20796E-3	1	5.45386E-3	1	5.59006E-3	1	4.22623E-3	1
molcular	GO:0000030	mannosyltransferase activity	2.99083E-2	1	3.95971E-2	1	3.89266E-2	1	3.31312E-2	1
	GO:0000036	acyl carrier activity	4.19647E-2	1	1.45821E-2	1	1.43561E-2	1	1.10845E-2	1
	GO:0000049	tRNA binding	2.99083E-2	1	3.95971E-2	1	3.89266E-2	1	3.31312E-2	1
	GO:0000155	two-component sensor activity	3.38237E-3	1	3.49558E-5	1	3.48656E-5	1	1.96655E-4	1
	GO:0000175	3'-5'-exoribonuclease activity	9.28922E-3	1	1.45821E-2	1	1.43561E-2	1	1.10845E-2	1
	GO:0000287	magnesium ion binding	4.2216E-14	1	6.57697E-14	1	2.34379E-15	1	3.04599E-12	1
	GO:0003678	DNA helicase activity	1.7184E-2	1	4.80387E-4	1	5.00594E-4	1	6.86763E-3	1
	GO:0003684	damaged DNA binding	1.02872E-4	1	2.2828E-6	1	2.24746E-6	1	1.12634E-6	1
	GO:0003690	double-stranded DNA binding	1.47245E-3	1	9.10797E-6	1	9.43751E-6	1	4.9402E-6	1
	GO:0003697	single-stranded DNA binding	5.13806E-3	1	1.96135E-5	1	1.94073E-5	1	1.28203E-5	1
	GO:0003702	RNA polymerase II transcription factor activity	2.18514E-3	1	2.53565E-3	1	6.54063E-3	1	3.8324E-3	1
	GO:0003712	transcription cofactor activity	1.02202E-2	1	3.29536E-4	1	3.49062E-4	1	7.20134E-4	1
	GO:0003713	transcription coactivator activity	2.84841E-2	1	4.31677E-4	1	4.5195E-4	1	1.34994E-3	1
	GO:0003724	RNA helicase activity	6.80658E-4	1	1.04058E-4	1	1.07121E-4	1	7.59464E-5	1
	GO:0003725	double-stranded RNA binding	2.46961E-2	1	7.60795E-4	1	7.84765E-4	1	2.80561E-3	1
	GO:0003727	single-stranded RNA binding	8.68188E-4	1	2.0415E-3	1	2.0509E-3	1	1.34994E-3	1
	GO:0003729	mRNA binding	7.07009E-3	1	1.22165E-2	1	1.2128E-2	1	8.94161E-3	1
	GO:0003735	structural constituent of ribosome	1.91567E-28	1	2.21385E-26	1	9.80173E-26	1	3.42428E-29	1
	GO:0003743	translation initiation factor activity	1.14891E-8	1	8.6168E-8	1	8.82712E-8	1	6.13646E-8	1
	GO:0003746	translation elongation factor activity	2.78622E-5	1	9.44276E-5	1	9.76948E-5	1	5.47284E-5	1
	GO:0003747	translation release factor activity	5.65427E-3	1	9.09414E-3	1	9.10042E-3	1	6.82736E-3	1
	GO:0003755	peptidyl-prolyl cis-trans isomerase activity	9.01789E-11	1	1.17674E-10	1	1.29334E-10	1	3.65502E-11	1
	GO:0003756	protein disulfide isomerase activity	3.38237E-3	1	2.75519E-2	1	5.69008E-3	1	2.07243E-2	1
	GO:0003774	motor activity	1.10193E-2	1	1.66852E-12	1	3.4836E-13	1	3.5837E-11	1
	GO:0003777	microtubule motor activity		0	4.68189E-8	1	1.46211E-9	1	1.22797E-6	1
	GO:0003779	actin binding	1.13357E-3	1	2.2055E-6	1	2.24746E-6	1	6.06472E-6	1
	GO:0003830	beta-1,4-mannosylglycoprotein 4-beta-N-acetylglucosaminyltransferase activity		0	3.95971E-2	1	3.89266E-2	1		0
	GO:0003854	3-beta-hydroxy-delta5-steroid dehydrogenase activity	1.61986E-2	1	4.42934E-3	1	1.82058E-3	1	5.84497E-3	1
	GO:0003872	6-phosphofructokinase activity	1.10639E-2	1	1.85236E-2	1	1.85011E-2	1	1.3657E-2	1
	GO:0003878	ATP citrate synthase activity		0	2.35685E-2	1	2.32525E-2	1	1.9227E-2	1
	GO:0003887	DNA-directed DNA polymerase activity	2.27708E-3	1	4.02416E-5	1	4.09062E-5	1	2.56348E-5	1
	GO:0003899	DNA-directed RNA polymerase activity	2.58541E-5	1	4.84597E-6	1	5.25141E-6	1	1.88043E-6	1
	GO:0003913	DNA photolyase activity	2.99083E-2	1	3.95971E-2	1	3.89266E-2	1	3.31312E-2	1
	GO:0003916	DNA topoisomerase activity	4.78544E-2	1	3.91031E-2	1	3.89266E-2	1		0
	GO:0003924	GTPase activity	2.3815E-16	1	1.77688E-19	1	2.1214E-19	1	1.64479E-21	1
	GO:0003968	RNA-directed RNA polymerase activity		0	2.35685E-2	1	2.32525E-2	1		0
	GO:0003995	acyl-CoA dehydrogenase activity	2.50944E-2	1	4.94055E-3	1	4.97771E-3	1	3.99489E-3	1
	GO:0004028	3-chloroallyl aldehyde dehydrogenase activity	5.65427E-3	1	9.09414E-3	1	9.10042E-3	1	6.82736E-3	1
	GO:0004045	aminoacyl-tRNA hydrolase activity	1.75344E-2	1	2.35685E-2	1	2.32525E-2	1	1.9227E-2	1
	GO:0004124	cysteine synthase activity	4.05263E-2	1		0		0		0
	GO:0004143	diacylglycerol kinase activity		0	3.6325E-2	1	3.59937E-2	1		0
	GO:0004177	aminopeptidase activity	2.20778E-6	1	8.80731E-6	1	1.39143E-6	1	4.57104E-6	1
	GO:0004221	ubiquitin thiolesterase activity	6.27573E-4	1	4.42485E-6	1	1.22E-6	1	6.11733E-6	1
	GO:0004222	metalloendopeptidase activity	2.19432E-7	1	4.32108E-11	1	4.9141E-11	1	2.03917E-9	1
	GO:0004298	threonine-type endopeptidase activity	2.26607E-6	1	6.142E-6	1	6.41845E-6	1	3.97978E-6	1
	GO:0004312	fatty acid synthase activity	2.75295E-2	1	2.15626E-3	1	2.1251E-3	1	1.56988E-3	1
	GO:0004332	fructose-bisphosphate aldolase activity	3.34878E-3	1	3.6325E-2	1	3.59937E-2	1	3.99489E-3	1
	GO:0004349	glutamate 5-kinase activity	2.99083E-2	1	3.95971E-2	1	3.89266E-2	1	3.31312E-2	1
	GO:0004372	glycine hydroxymethyltransferase activity	5.65427E-3	1	9.09414E-3	1	9.10042E-3	1	6.82736E-3	1
	GO:0004386	helicase activity	2.3315E-16	1	1.64637E-26	1	9.80173E-26	1	2.04982E-22	1
	GO:0004407	histone deacetylase activity		0	7.97405E-3	1	8.00587E-3	1	5.70157E-3	1
	GO:0004427	inorganic diphosphatase activity	4.45234E-2	1		0	3.05588E-2	1		0
	GO:0004428	inositol or phosphatidylinositol kinase activity		0	1.16836E-2	1	1.19349E-2	1		0
	GO:0004437	inositol or phosphatidylinositol phosphatase activity	1.44546E-2	1		0		0	2.04129E-2	1
	GO:0004518	nuclease activity	2.39322E-7	1	2.57523E-9	1	8.06958E-11	1	5.41578E-10	1
	GO:0004519	endonuclease activity		0	4.80525E-2	1	2.22991E-2	1		0
	GO:0004525	ribonuclease III activity		0	2.35274E-2	1	2.31714E-2	1	1.81404E-2	1
	GO:0004527	exonuclease activity	8.8269E-6	1	6.52728E-8	1	1.5952E-8	1	1.65822E-8	1
	GO:0004535	poly(A)-specific ribonuclease activity	1.17728E-2	1	4.94055E-3	1	7.84765E-4	1	3.72383E-3	1
	GO:0004540	ribonuclease activity		0	2.77837E-2	1	1.16094E-2	1	1.39448E-2	1
	GO:0004551	nucleotide diphosphatase activity	3.92016E-2	1		0	2.07201E-2	1		0
	GO:0004576	oligosaccharyl transferase activity	2.99083E-2	1	3.95971E-2	1	3.89266E-2	1	3.31312E-2	1
	GO:0004616	phosphogluconate dehydrogenase (decarboxylating) activity	5.65427E-3	1	8.51376E-3	1	8.47201E-3	1	6.72363E-3	1
	GO:0004673	protein histidine kinase activity	3.38237E-3	1	3.49558E-5	1	3.48656E-5	1	1.96655E-4	1
	GO:0004689	phosphorylase kinase activity		0	2.35685E-2	1	2.32525E-2	1	1.9227E-2	1
	GO:0004693	cyclin-dependent protein kinase activity		0	5.61147E-6	1	5.91802E-6	1	8.04081E-5	1
	GO:0004707	MAP kinase activity		0	1.98782E-2	1	4.40004E-2	1	1.29624E-2	1
	GO:0004712	protein serine/threonine/tyrosine kinase activity	6.07947E-4	1	1.01298E-4	1	1.07094E-4	1	4.38602E-4	1
	GO:0004714	transmembrane receptor protein tyrosine kinase activity	2.99083E-2	1		0		0	3.31312E-2	1
	GO:0004721	phosphoprotein phosphatase activity	2.86921E-11	1	8.73593E-10	1	1.43906E-10	1	5.66039E-10	1
	GO:0004722	protein serine/threonine phosphatase activity	8.21063E-8	1	2.03092E-7	1	8.65012E-8	1	2.41295E-7	1
	GO:0004725	protein tyrosine phosphatase activity	2.39255E-5	1	4.31677E-4	1	6.93799E-5	1	2.73532E-4	1
	GO:0004765	shikimate kinase activity	1.55516E-2	1		0		0		0
	GO:0004812	aminoacyl-tRNA ligase activity	7.52514E-3	1	4.41357E-3	1	4.60296E-3	1	4.27506E-3	1
	GO:0004815	aspartate-tRNA ligase activity	1.0055E-2	1	1.45821E-2	1	1.43561E-2	1	1.12263E-2	1
	GO:0004842	ubiquitin-protein ligase activity	9.54301E-14	1	7.57474E-13	1	1.94187E-14	1	1.64634E-12	1
	GO:0004843	ubiquitin-specific protease activity	7.32174E-5	1	1.63082E-4	1	1.6643E-4	1	1.13133E-4	1
	GO:0004860	protein kinase inhibitor activity		0	2.35685E-2	1	2.32525E-2	1	1.9227E-2	1
	GO:0004861	cyclin-dependent protein kinase inhibitor activity		0	2.35685E-2	1	2.32525E-2	1	1.9227E-2	1
	GO:0004871	signal transducer activity	4.94424E-12	1	3.69476E-6	1	9.07127E-6	1	5.06974E-8	1
	GO:0004872	receptor activity	6.42075E-10	1	5.49401E-4	1	7.17823E-4	1	1.80971E-5	1
	GO:0004879	ligand-activated sequence-specific DNA binding RNA polymerase II transcription factor activity		0	3.49598E-2	1	3.54591E-2	1	4.76585E-2	1
	GO:0004888	transmembrane signaling receptor activity	3.40676E-2	1		0		0		0
	GO:0005048	signal sequence binding	9.28922E-3	1	1.45821E-2	1	1.43561E-2	1	1.10845E-2	1
	GO:0005083	small GTPase regulator activity	4.79599E-5	1	6.0712E-6	1	6.47641E-6	1	2.16261E-6	1
	GO:0005096	GTPase activator activity	1.61465E-8	1	2.76701E-8	1	3.76288E-9	1	1.26752E-9	1
	GO:0005097	Rab GTPase activator activity	4.10996E-5	1	1.00609E-4	1	1.02625E-4	1	6.64724E-5	1
	GO:0005200	structural constituent of cytoskeleton	2.23958E-2	1	2.4751E-3	1	2.48358E-3	1	4.94823E-3	1
	GO:0005216	ion channel activity	9.23074E-3	1	4.94055E-3	1	1.82058E-3	1	5.63769E-3	1
	GO:0005244	voltage-gated ion channel activity	1.19637E-2	1	4.94055E-3	1	2.71005E-3	1	2.34016E-3	1
	GO:0005253	anion channel activity	1.13018E-2	1	2.20557E-2	1		0	1.52742E-2	1
	GO:0005254	chloride channel activity	4.12318E-2	1		0		0		0
	GO:0005261	cation channel activity		0	1.93524E-2	1	3.21358E-3	1	2.9368E-2	1
	GO:0005267	potassium channel activity		0	1.78349E-2	1	4.95799E-3	1	9.95959E-3	1
	GO:0005319	lipid transporter activity	2.53107E-2	1		0	2.09017E-2	1		0
	GO:0005338	nucleotide-sugar transmembrane transporter activity	5.65427E-3	1	8.51376E-3	1	8.47201E-3	1	6.72363E-3	1
	GO:0005375	copper ion transmembrane transporter activity		0	2.93704E-2	1	2.99211E-2	1		0
	GO:0005484	SNAP receptor activity		0		0	2.01456E-2	1		0
	GO:0005496	steroid binding	2.26607E-6	1	6.23357E-4	1	1.97066E-4	1	2.67062E-5	1
	GO:0005509	calcium ion binding	3.92946E-2	1		0		0		0
	GO:0005516	calmodulin binding	8.68444E-7	1	6.52728E-8	1	6.954E-10	1	2.02794E-8	1
	GO:0005525	GTP binding	2.1442E-17	1	1.12302E-17	1	5.36167E-18	1	2.17405E-19	1
	GO:0005528	FK506 binding	6.07035E-4	1	1.63082E-4	1	1.6643E-4	1	1.13133E-4	1
	GO:0005543	phospholipid binding	1.75344E-2	1	7.06245E-3	1	1.31362E-2	1	1.9227E-2	1
	GO:0005548	phospholipid transporter activity		0		0	3.00834E-2	1		0
	GO:0008017	microtubule binding	4.78544E-2	1	4.02416E-5	1	4.09062E-5	1	1.04612E-2	1
	GO:0008047	enzyme activator activity	1.1907E-12	1	3.81633E-11	1	6.27009E-12	1	1.15879E-12	1
	GO:0008060	ARF GTPase activator activity	2.75295E-2	1	1.22165E-2	1	1.2128E-2	1	8.94161E-3	1
	GO:0008080	N-acetyltransferase activity	4.84082E-3	1	5.48934E-6	1	5.85552E-6	1	1.60246E-4	1
	GO:0008092	cytoskeletal protein binding	1.56347E-5	1	9.73865E-12	1	1.10973E-11	1	4.07202E-9	1
	GO:0008134	transcription factor binding	6.05959E-6	1	1.67358E-7	1	1.69015E-7	1	7.01895E-7	1
	GO:0008135	translation factor activity, nucleic acid binding	1.17574E-14	1	1.32995E-13	1	1.37347E-13	1	5.57189E-14	1
	GO:0008138	protein tyrosine/serine/threonine phosphatase activity	1.75344E-2	1	2.75519E-2	1	2.7663E-2	1	2.07243E-2	1
	GO:0008168	methyltransferase activity	1.48681E-12	1	1.92927E-11	1	1.7381E-12	1	6.55592E-11	1
	GO:0008170	N-methyltransferase activity	1.84812E-6	1	2.32332E-6	1	7.68364E-8	1	1.0069E-6	1
	GO:0008173	RNA methyltransferase activity	6.98764E-6	1	1.23306E-6	1	1.22E-6	1	7.17101E-7	1
	GO:0008194	UDP-glycosyltransferase activity	9.24796E-5	1	4.43739E-2	1	3.6061E-2	1	1.25111E-2	1
	GO:0008235	metalloexopeptidase activity	7.88005E-3	1	1.47954E-2	1	1.47133E-2	1	1.0602E-2	1
	GO:0008237	metallopeptidase activity	2.78036E-3	1	5.8643E-4	1	1.13026E-3	1	3.07708E-3	1
	GO:0008242	omega peptidase activity		0	3.95971E-2	1	3.89266E-2	1	3.31312E-2	1
	GO:0008266	poly(U) RNA binding	2.78036E-3	1	4.94055E-3	1	4.99859E-3	1	3.72383E-3	1
	GO:0008276	protein methyltransferase activity	4.55141E-5	1	4.60291E-5	1	2.11159E-6	1	9.79177E-5	1
	GO:0008308	voltage-gated anion channel activity	2.46961E-2	1	4.19104E-2	1		0	3.197E-2	1
	GO:0008312	7S RNA binding	1.02609E-3	1	1.70753E-3	1	1.70632E-3	1	1.33137E-3	1
	GO:0008320	protein transmembrane transporter activity	1.61465E-8	1	2.38348E-7	1	6.90658E-8	1	1.65822E-8	1
	GO:0008324	cation transmembrane transporter activity	4.53358E-6	1	8.2021E-6	1	8.22057E-7	1	1.5652E-6	1
	GO:0008327	methyl-CpG binding	4.12318E-2	1	1.85236E-2	1	1.85011E-2	1	1.3657E-2	1
	GO:0008353	RNA polymerase II carboxy-terminal domain kinase activity		0	2.90221E-3	1	2.86702E-3	1	2.28666E-3	1
	GO:0008375	acetylglucosaminyltransferase activity	5.33559E-3	1	5.8233E-5	1	5.94824E-5	1	1.80103E-3	1
	GO:0008408	3'-5' exonuclease activity	9.9754E-3	1	1.04058E-4	1	1.08461E-4	1	6.60305E-5	1
	GO:0008415	transferase activity, transferring acyl groups	1.84585E-5	1	7.78674E-10	1	2.0713E-9	1	1.11429E-8	1
	GO:0008483	transaminase activity	2.48946E-3	1	1.58965E-2	1	7.953E-3	1	2.28218E-4	1
	GO:0008514	organic anion transmembrane transporter activity		0	3.05149E-2	1	3.05743E-2	1	2.18905E-2	1
	GO:0008536	Ran GTPase binding	6.07035E-4	1	1.2469E-3	1	1.6643E-4	1	8.68527E-4	1
	GO:0008565	protein transporter activity	9.46645E-16	1	4.56921E-14	1	6.49138E-16	1	1.74681E-16	1
	GO:0008601	protein phosphatase type 2A regulator activity	3.84358E-7	1	1.47211E-6	1	1.45407E-6	1	8.03005E-7	1
	GO:0008641	small protein activating enzyme activity	1.88933E-3	1	2.90221E-3	1	2.86702E-3	1	2.28666E-3	1
	GO:0008757	S-adenosylmethionine-dependent methyltransferase activity	8.00938E-4	1	5.36227E-3	1	1.00178E-3	1	1.06135E-2	1
	GO:0008831	dTDP-4-dehydrorhamnose reductase activity	4.81669E-4	1	1.78217E-4	1	1.82821E-4	1	7.18943E-4	1
	GO:0008937	ferredoxin-NAD(P) reductase activity	2.99083E-2	1	3.95971E-2	1	3.89266E-2	1	3.31312E-2	1
	GO:0008967	phosphoglycolate phosphatase activity	1.75344E-2	1	2.35685E-2	1	2.32525E-2	1	1.9227E-2	1
	GO:0009881	photoreceptor activity	3.17998E-4	1	5.49401E-4	1	5.70653E-4	1	4.11236E-4	1
	GO:0009982	pseudouridine synthase activity	2.3019E-4	1	4.68677E-4	1	4.85963E-4	1	3.20568E-4	1
	GO:0010011	auxin binding	1.75344E-2	1	2.35685E-2	1	2.32525E-2	1	1.9227E-2	1
	GO:0010181	FMN binding	7.81457E-5	1	2.25265E-4	1	1.01423E-3	1	2.31988E-3	1
	GO:0015075	ion transmembrane transporter activity	2.36254E-7	1	9.19021E-7	1	4.49024E-8	1	2.64925E-7	1
	GO:0015079	potassium ion transmembrane transporter activity	5.33559E-3	1	1.02139E-2	1	1.03232E-2	1	6.86763E-3	1
	GO:0015085	calcium ion transmembrane transporter activity		0	4.31446E-2	1	4.27986E-2	1		0
	GO:0015326	cationic amino acid transmembrane transporter activity	4.19647E-2	1	1.45821E-2	1	1.43561E-2	1		0
	GO:0015399	primary active transmembrane transporter activity	1.97239E-5	1	2.22028E-7	1	6.90658E-8	1	3.79388E-6	1
	GO:0015450	P-P-bond-hydrolysis-driven protein transmembrane transporter activity	1.92039E-8	1	2.38348E-7	1	6.40472E-8	1	1.65822E-8	1
	GO:0015631	tubulin binding	1.96514E-2	1	7.23537E-7	1	7.43327E-7	1	4.38336E-4	1
	GO:0016149	translation release factor activity, codon specific	1.75344E-2	1	2.35685E-2	1	2.32525E-2	1	1.9227E-2	1
	GO:0016161	beta-amylase activity	4.05263E-2	1		0		0	4.76585E-2	1
	GO:0016168	chlorophyll binding	2.01028E-2	1	1.51417E-2	1	1.51325E-2	1	1.04612E-2	1
	GO:0016208	AMP binding	8.68188E-4	1	2.17335E-2	1	2.0509E-3	1	4.96282E-3	1
	GO:0016251	general RNA polymerase II transcription factor activity	1.78633E-2	1	2.98787E-2	1	3.00834E-2	1	2.18905E-2	1
	GO:0016289	CoA hydrolase activity	1.78633E-2	1	7.97405E-3	1	8.00587E-3	1	5.70157E-3	1
	GO:0016291	acyl-CoA hydrolase activity	4.19647E-2	1		0		0		0
	GO:0016407	acetyltransferase activity	3.17998E-4	1	2.28042E-8	1	1.08844E-7	1	2.87861E-6	1
	GO:0016410	N-acyltransferase activity	2.58198E-2	1	3.25771E-5	1	3.36964E-5	1	4.22481E-4	1
	GO:0016417	S-acyltransferase activity	5.65427E-3	1	8.51376E-3	1	8.47201E-3	1	6.72363E-3	1
	GO:0016538	cyclin-dependent protein kinase regulator activity		0	1.53904E-5	1	1.55175E-5	1	2.20229E-2	1
	GO:0016563	transcription activator activity	5.52381E-3	1	3.26819E-6	1	6.38761E-7	1	4.07216E-6	1
	GO:0016564	transcription repressor activity	5.04494E-4	1	3.09715E-4	1	9.7729E-6	1	5.13275E-5	1
	GO:0016597	amino acid binding	8.73439E-3	1	1.83878E-4	1	1.11689E-3	1	2.35746E-3	1
	GO:0016614	oxidoreductase activity, acting on CH-OH group of donors	2.30065E-10	1	1.55962E-8	1	3.64707E-9	1	5.41578E-10	1
	GO:0016616	oxidoreductase activity, acting on the CH-OH group of donors, NAD or NADP as acceptor	3.83888E-11	1	1.02313E-8	1	8.93951E-10	1	2.05563E-9	1
	GO:0016620	oxidoreductase activity, acting on the aldehyde or oxo group of donors, NAD or NADP as acceptor	1.38194E-2	1	3.40868E-3	1	3.46644E-3	1	2.08458E-2	1
	GO:0016624	oxidoreductase activity, acting on the aldehyde or oxo group of donors, disulfide as acceptor	9.28922E-3	1	1.45821E-2	1	1.43561E-2	1	1.10845E-2	1
	GO:0016627	oxidoreductase activity, acting on the CH-CH group of donors	1.18081E-2	1		0	4.27986E-2	1		0
	GO:0016667	oxidoreductase activity, acting on a sulfur group of donors	7.60599E-3	1	1.06254E-3	1	1.13026E-3	1	5.70157E-3	1
	GO:0016671	oxidoreductase activity, acting on a sulfur group of donors, disulfide as acceptor		0	4.80525E-2	1	4.80895E-2	1		0
	GO:0016746	transferase activity, transferring acyl groups	1.0434E-3	1	2.38348E-7	1	3.01486E-6	1	4.68965E-6	1
	GO:0016747	transferase activity, transferring acyl groups other than amino-acyl groups	3.74314E-3	1	1.35373E-6	1	8.67091E-6	1	3.10393E-5	1
	GO:0016757	transferase activity, transferring glycosyl groups	6.3217E-6	1	9.78054E-4	1	8.62084E-4	1	1.19792E-4	1
	GO:0016758	transferase activity, transferring hexosyl groups	4.96473E-4	1	2.35685E-2	1	2.07201E-2	1	4.60174E-3	1
	GO:0016763	transferase activity, transferring pentosyl groups	2.09529E-2	1	1.16836E-2	1	1.19349E-2	1	6.83574E-3	1
	GO:0016769	transferase activity, transferring nitrogenous groups		0		0		0	1.5973E-2	1
	GO:0016776	phosphotransferase activity, phosphate group as acceptor	2.26607E-6	1	6.142E-6	1	6.41845E-6	1	3.97978E-6	1
	GO:0016780	phosphotransferase activity, for other substituted phosphate groups	5.84492E-4	1	9.63115E-4	1	9.73505E-4	1	7.35339E-4	1
	GO:0016783	sulfurtransferase activity	1.88933E-3	1		0		0	1.81404E-2	1
	GO:0016791	phosphatase activity	6.37348E-14	1	6.12655E-13	1	5.68839E-14	1	3.24659E-13	1
	GO:0016799	hydrolase activity, hydrolyzing N-glycosyl compounds	3.2499E-3	1		0	6.21114E-3	1	8.68527E-4	1
	GO:0016810	hydrolase activity, acting on carbon-nitrogen (but not peptide) bonds	2.66025E-8	1	9.43835E-8	1	9.80546E-8	1	1.86382E-9	1
	GO:0016811	hydrolase activity, acting on carbon-nitrogen (but not peptide) bonds, in linear amides	1.37535E-6	1	4.97027E-7	1	5.3482E-7	1	1.91112E-7	1
	GO:0016813	hydrolase activity, acting on carbon-nitrogen (but not peptide) bonds, in linear amidines	2.99083E-2	1		0		0	3.31312E-2	1
	GO:0016820	hydrolase activity, acting on acid anhydrides, catalyzing transmembrane movement of substances	3.98214E-2	1	1.8914E-3	1	8.42225E-4	1	1.79089E-2	1
	GO:0016829	lyase activity	4.3791E-5	1	3.52031E-3	1	4.03991E-3	1	3.0839E-4	1
	GO:0016830	carbon-carbon lyase activity	1.34435E-4	1	1.53795E-4	1	3.50616E-4	1	5.25845E-5	1
	GO:0016831	carboxy-lyase activity	1.00913E-2	1	2.22818E-3	1	4.95799E-3	1	1.81404E-2	1
	GO:0016832	aldehyde-lyase activity		0		0		0	2.13109E-2	1
	GO:0016836	hydro-lyase activity	3.33167E-6	1	5.14766E-4	1	5.59095E-4	1	9.17545E-5	1
	GO:0016851	magnesium chelatase activity		0	3.95971E-2	1	3.89266E-2	1	3.31312E-2	1
	GO:0016853	isomerase activity	1.23406E-26	1	2.63768E-25	1	9.80173E-26	1	2.71109E-26	1
	GO:0016857	racemase and epimerase activity, acting on carbohydrates and derivatives	1.70917E-4	1	1.43047E-4	1	1.48991E-4	1	3.12847E-4	1
	GO:0016860	intramolecular oxidoreductase activity	8.12176E-10	1	2.81298E-6	1	5.3482E-7	1	1.22797E-6	1
	GO:0016866	intramolecular transferase activity	4.24835E-3	1	2.36482E-3	1	2.41011E-3	1	4.55515E-4	1
	GO:0016868	intramolecular transferase activity, phosphotransferases		0	2.35274E-2	1	2.31714E-2	1	2.28666E-3	1
	GO:0016874	ligase activity	9.53299E-24	1	2.21385E-26	1	3.59354E-27	1	3.01674E-25	1
	GO:0016876	ligase activity, forming aminoacyl-tRNA and related compounds	7.52514E-3	1	4.41357E-3	1	4.60296E-3	1	4.27506E-3	1
	GO:0016879	ligase activity, forming carbon-nitrogen bonds	6.08561E-20	1	5.66774E-20	1	8.87479E-22	1	8.23087E-19	1
	GO:0016881	acid-amino acid ligase activity	1.25505E-15	1	7.28181E-15	1	1.51424E-16	1	3.00244E-14	1
	GO:0016884	carbon-nitrogen ligase activity, with glutamine as amido-N-donor	4.51748E-3	1	1.28114E-3	1	1.28226E-3	1	5.70157E-3	1
	GO:0016887	ATPase activity	3.74665E-15	1	3.20108E-24	1	6.16723E-24	1	2.62146E-20	1
	GO:0018024	histone-lysine N-methyltransferase activity	9.23074E-3	1	7.78172E-3	1	6.9077E-4	1	4.94823E-3	1
	GO:0019001	guanyl nucleotide binding	5.48999E-19	1	1.80822E-18	1	1.1332E-19	1	2.67599E-20	1
	GO:0019104	DNA N-glycosylase activity	7.07009E-3	1		0	1.2128E-2	1	1.56988E-3	1
	GO:0019200	carbohydrate kinase activity	1.1168E-4	1	3.56102E-5	1	3.65763E-5	1	2.28218E-4	1
	GO:0019201	nucleotide kinase activity	3.17998E-4	1	5.49401E-4	1	5.70653E-4	1	4.11236E-4	1
	GO:0019205	nucleobase-containing compound kinase activity	7.72146E-7	1	1.96441E-5	1	1.99798E-5	1	5.25845E-5	1
	GO:0019210	kinase inhibitor activity		0	2.35685E-2	1	2.32525E-2	1	1.9227E-2	1
	GO:0019787	small conjugating protein ligase activity	1.5482E-14	1	1.516E-13	1	3.37769E-15	1	3.24659E-13	1
	GO:0019843	rRNA binding	9.44931E-4	1	4.41357E-3	1	4.60296E-3	1	2.19724E-3	1
	GO:0019887	protein kinase regulator activity		0	2.94294E-7	1	3.1662E-7	1	1.56988E-3	1
	GO:0019899	enzyme binding	1.12022E-4	1	4.28257E-4	1	4.5195E-4	1	2.28218E-4	1
	GO:0030145	manganese ion binding	5.44544E-10	1	2.76701E-8	1	2.9893E-9	1	5.21691E-9	1
	GO:0030170	pyridoxal phosphate binding	1.16203E-4	1	3.53435E-3	1	2.1251E-3	1	3.9965E-4	1
	GO:0030276	clathrin binding	2.23958E-2	1	3.98556E-2	1	3.98747E-2	1		0
	GO:0030552	cAMP binding	1.75556E-2	1		0	3.05743E-2	1		0
	GO:0030553	cGMP binding	2.62944E-2	1		0	4.27986E-2	1		0
	GO:0030955	potassium ion binding	4.15858E-2	1	1.75063E-2	1	3.32549E-2	1	1.03147E-2	1
	GO:0030983	mismatched DNA binding		0	1.45821E-2	1	1.43561E-2	1	1.10845E-2	1
	GO:0031072	heat shock protein binding	1.48681E-12	1	3.13364E-13	1	3.4836E-13	1	1.44035E-13	1
	GO:0031405	lipoic acid binding	2.50944E-2	1	4.94055E-3	1	4.97771E-3	1	3.99489E-3	1
	GO:0035064	methylated histone residue binding	5.65427E-3	1	8.51376E-3	1	8.47201E-3	1	6.72363E-3	1
	GO:0035091	phosphatidylinositol binding	2.7326E-4	1	1.52346E-4	1	1.61659E-4	1	1.45512E-3	1
	GO:0042054	histone methyltransferase activity	2.10653E-3	1	1.77602E-3	1	1.22296E-4	1	1.09765E-3	1
	GO:0042162	telomeric DNA binding	1.0055E-2	1	1.45821E-2	1	1.43561E-2	1	1.12263E-2	1
	GO:0042277	peptide binding	5.17394E-6	1	8.56726E-4	1	2.30531E-3	1	1.23379E-3	1
	GO:0042393	histone binding	2.04E-3	1	3.23763E-4	1	3.33898E-4	1	2.31023E-4	1
	GO:0042578	phosphoric ester hydrolase activity	3.77384E-14	1	2.5291E-13	1	6.41273E-14	1	7.24351E-13	1
	GO:0042802	identical protein binding	1.1153E-6	1	1.43826E-7	1	6.90658E-8	1	7.17101E-7	1
	GO:0042803	protein homodimerization activity	4.97633E-10	1	6.96532E-9	1	8.13657E-10	1	1.50357E-8	1
	GO:0042973	glucan endo-1,3-beta-D-glucosidase activity	1.75344E-2	1	5.65004E-3	1	5.69008E-3	1	2.07243E-2	1
	GO:0043295	glutathione binding	5.65427E-3	1		0		0		0
	GO:0043565	sequence-specific DNA binding		0	3.05149E-2	1	1.87163E-2	1		0
	GO:0046527	glucosyltransferase activity	3.93134E-2	1		0		0	1.12263E-2	1
	GO:0046873	metal ion transmembrane transporter activity	4.75895E-4	1	3.99933E-5	1	6.73274E-6	1	1.63654E-4	1
	GO:0046982	protein heterodimerization activity	1.47245E-3	1	9.10797E-6	1	1.22E-6	1	1.6898E-4	1
	GO:0046983	protein dimerization activity	3.36765E-4	1	1.04058E-4	1	1.51472E-5	1	2.2014E-4	1
	GO:0047262	polygalacturonate 4-alpha-galacturonosyltransferase activity	7.65183E-4	1	1.70493E-3	1	1.70632E-3	1	1.15771E-3	1
	GO:0048037	cofactor binding	6.48988E-15	1	4.28978E-15	1	6.84814E-16	1	3.10401E-15	1
	GO:0048040	UDP-glucuronate decarboxylase activity	2.99083E-2	1	3.95971E-2	1	3.89266E-2	1	3.31312E-2	1
	GO:0050661	NADP binding		0	2.75519E-2	1	1.56133E-2	1		0
	GO:0050662	coenzyme binding	3.22482E-12	1	2.98662E-14	1	6.8655E-15	1	5.03145E-13	1
	GO:0050825	ice binding		0	8.0111E-3	1	8.37671E-3	1	4.13612E-3	1
	GO:0050897	cobalt ion binding	1.88933E-3	1	2.90221E-3	1	2.86702E-3	1	2.28666E-3	1
	GO:0051015	actin filament binding		0	1.45821E-2	1	1.43561E-2	1	1.12263E-2	1
	GO:0051020	GTPase binding	2.39255E-5	1	6.75666E-5	1	6.9662E-6	1	4.38417E-5	1
	GO:0051082	unfolded protein binding	2.8041E-15	1	1.80822E-18	1	2.8782E-19	1	6.67947E-18	1
	GO:0051087	chaperone binding	5.65427E-3	1	8.51376E-3	1	8.47201E-3	1	6.72363E-3	1
	GO:0051287	NAD binding	2.26607E-6	1	4.42485E-6	1	4.78213E-6	1	6.11733E-6	1
	GO:0051536	iron-sulfur cluster binding	1.77784E-8	1	7.21115E-9	1	1.68143E-9	1	2.3216E-8	1
	GO:0051537	2 iron, 2 sulfur cluster binding	3.31273E-3	1	6.45031E-4	1	6.9077E-4	1	4.94823E-3	1
	GO:0051539	4 iron, 4 sulfur cluster binding	3.13997E-3	1	2.56243E-3	1	7.81385E-4	1	1.58577E-3	1
	GO:0070566	adenylyltransferase activity	2.039E-3	1	7.60795E-4	1	7.84765E-4	1	2.80561E-3	1
cellular	GO:0000151	ubiquitin ligase complex	1.72434E-24	1	5.05489E-28	1	2.30178E-26	1	1.26495E-25	1
	GO:0000159	protein phosphatase type 2A complex	7.4793E-8	1	3.73065E-7	1	3.91103E-7	1	1.81696E-7	1
	GO:0000164	protein phosphatase type 1 complex	2.70263E-2	1	3.7198E-2	1	3.8774E-2	1	3.12366E-2	1
	GO:0000325	plant-type vacuole	6.88795E-5	1	4.91679E-6	1	5.4632E-6	1	6.4933E-6	1
	GO:0000502	proteasome complex	1.23303E-14	1	1.63313E-13	1	1.93789E-13	1	4.92364E-14	1
	GO:0000793	condensed chromosome		0	4.63578E-3	1	4.86559E-3	1	3.26351E-3	1
	GO:0000932	cytoplasmic mRNA processing body	2.70263E-2	1	3.7198E-2	1	3.8774E-2	1	3.12366E-2	1
	GO:0005618	cell wall	4.09283E-8	1	5.26903E-10	1	6.25257E-9	1	3.52671E-10	1
	GO:0005624	membrane fraction	1.99781E-9	1	1.64685E-6	1	1.78009E-6	1	8.40485E-8	1
	GO:0005625	soluble fraction	4.86832E-2	1		0		0		0
	GO:0005694	chromosome	2.46624E-11	1	1.06305E-18	1	5.22635E-19	1	5.74764E-18	1
	GO:0005732	small nucleolar ribonucleoprotein complex	8.34956E-4	1	2.86251E-3	1	5.83591E-3	1	1.15319E-3	1
	GO:0005768	endosome	1.28348E-11	1	3.78514E-14	1	5.02101E-13	1	9.18139E-14	1
	GO:0005770	late endosome	1.94609E-4	1	3.97494E-4	1	4.11826E-4	1	2.80725E-4	1
	GO:0005773	vacuole	1.89872E-64	1	1.11249E-53	1	7.26035E-52	1	3.70194E-58	1
	GO:0005777	peroxisome	3.74634E-17	1	8.16984E-17	1	1.956E-17	1	5.74764E-18	1
	GO:0005783	endoplasmic reticulum	1.40958E-44	1	3.7974E-41	1	2.31544E-38	1	3.05577E-38	1
	GO:0005786	signal recognition particle, endoplasmic reticulum targeting	3.33502E-2	1		0		0	4.13596E-2	1
	GO:0005792	microsome	4.25354E-8	1	2.18241E-5	1	2.32951E-5	1	1.33019E-6	1
	GO:0005794	Golgi apparatus	5.52422E-43	1	3.35565E-36	1	2.33239E-37	1	3.3639E-38	1
	GO:0005829	cytosol	3.75771E-95	1	5.5413E-85	1	9.90056E-87	1	2.23415E-89	1
	GO:0005834	heterotrimeric G-protein complex	4.73814E-6	1	7.9806E-7	1	2.05257E-7	1	1.1347E-6	1
	GO:0005835	fatty acid synthase complex	4.86832E-2	1		0		0		0
	GO:0005838	proteasome regulatory particle	7.31914E-8	1	3.09469E-7	1	3.21822E-7	1	1.66685E-7	1
	GO:0005839	proteasome core complex	5.16334E-7	1	1.76035E-6	1	1.86586E-6	1	1.07045E-6	1
	GO:0005840	ribosome	3.19063E-39	1	5.49142E-36	1	1.34842E-34	1	2.60003E-39	1
	GO:0005852	eukaryotic translation initiation factor 3 complex	2.03266E-2	1	3.23134E-2	1	3.3935E-2	1	2.57095E-2	1
	GO:0005853	eukaryotic translation elongation factor 1 complex		0	3.7198E-2	1	3.8774E-2	1	3.12366E-2	1
	GO:0005856	cytoskeleton	2.47931E-9	1	3.52048E-20	1	2.06882E-20	1	4.82635E-19	1
	GO:0005938	cell cortex	1.73449E-3	1	5.85434E-3	1	8.49573E-4	1	3.19154E-2	1
	GO:0005964	phosphorylase kinase complex		0	1.29188E-2	1	1.3183E-2	1	1.04278E-2	1
	GO:0008287	protein serine/threonine phosphatase complex	2.11214E-11	1	1.19212E-11	1	1.39853E-11	1	1.83458E-11	1
	GO:0008540	proteasome regulatory particle, base subcomplex	6.81038E-4	1	1.29949E-3	1	1.31474E-3	1	9.64517E-4	1
	GO:0008541	proteasome regulatory particle, lid subcomplex	6.81038E-4	1	1.29949E-3	1	1.31474E-3	1	9.64517E-4	1
	GO:0009288	bacterial-type flagellum	1.24062E-2	1		0		0		0
	GO:0009295	nucleoid	2.43791E-10	1	1.4157E-9	1	1.60021E-9	1	6.13528E-10	1
	GO:0009331	glycerol-3-phosphate dehydrogenase complex	7.08911E-3	1	1.25945E-2	1	1.29181E-2	1	9.65564E-3	1
	GO:0009360	DNA polymerase III complex	4.86832E-2	1		0		0		0
	GO:0009504	cell plate	2.34099E-4	1	3.52018E-5	1	3.68422E-5	1	2.29972E-5	1
	GO:0009505	plant-type cell wall	8.1941E-3	1	4.76543E-4	1	8.78061E-4	1	6.21043E-4	1
	GO:0009506	plasmodesma	3.13524E-2	1	1.46382E-2	1	1.55154E-2	1	1.11171E-2	1
	GO:0009509	chromoplast	4.86832E-2	1		0		0		0
	GO:0009521	photosystem	4.20505E-4	1	2.22327E-3	1	1.00662E-2	1	1.01544E-3	1
	GO:0009522	photosystem I	3.11264E-3	1	8.03222E-3	1	8.52464E-3	1	5.18703E-3	1
	GO:0009523	photosystem II	4.51861E-3	1	1.42889E-2	1		0	8.78814E-3	1
	GO:0009524	phragmoplast	4.37696E-3	1	7.65471E-8	1	9.49071E-9	1	6.80635E-6	1
	GO:0009579	thylakoid	2.492E-67	1	1.58315E-54	1	8.73074E-50	1	2.38186E-58	1
	GO:0009986	cell surface		0	1.46382E-2	1		0	1.11171E-2	1
	GO:0010598	NAD(P)H dehydrogenase complex (plastoquinone)	2.40526E-3	1	3.23134E-2	1	3.3935E-2	1	3.20954E-3	1
	GO:0012506	vesicle membrane	8.89591E-10	1	6.71297E-9	1	7.40589E-9	1	2.64003E-9	1
	GO:0015629	actin cytoskeleton		0	3.87161E-2	1		0	1.32557E-2	1
	GO:0015630	microtubule cytoskeleton	4.29179E-7	1	3.1939E-22	1	1.03143E-24	1	3.26939E-18	1
	GO:0016023	cytoplasmic membrane-bounded vesicle	5.12641E-8	1	1.52175E-8	1	1.70504E-8	1	7.06422E-8	1
	GO:0016469	proton-transporting two-sector ATPase complex	1.49778E-3	1	4.66356E-3	1	5.16073E-3	1	1.01544E-3	1
	GO:0019005	SCF ubiquitin ligase complex	1.72341E-2	1	3.7198E-2	1	3.8774E-2	1	2.57233E-2	1
	GO:0019861	flagellum	9.2746E-3	1		0		0		0
	GO:0019866	organelle inner membrane	2.6737E-23	1	2.86975E-20	1	4.23242E-20	1	7.51218E-22	1
	GO:0019867	outer membrane	9.09938E-10	1	5.42516E-10	1	1.0538E-10	1	4.25937E-9	1
	GO:0019898	extrinsic to membrane	3.71808E-10	1	2.37391E-11	1	1.38153E-10	1	2.32783E-11	1
	GO:0022626	cytosolic ribosome	9.7175E-50	1	2.58778E-47	1	4.36539E-46	1	3.66414E-49	1
	GO:0030076	light-harvesting complex	8.30258E-3	1	4.26127E-2	1	4.58691E-2	1	1.32557E-2	1
	GO:0030117	membrane coat	9.78565E-9	1	1.17712E-7	1	1.32552E-7	1	1.74544E-7	1
	GO:0030118	clathrin coat	3.23638E-5	1	1.3619E-4	1	1.45981E-4	1	2.80725E-4	1
	GO:0030529	ribonucleoprotein complex	2.33E-53	1	1.93733E-48	1	2.11986E-46	1	4.10353E-53	1
	GO:0030880	RNA polymerase complex	1.58458E-4	1	6.32099E-5	1	6.68077E-5	1	3.74323E-5	1
	GO:0030904	retromer complex	2.70263E-2	1	3.7198E-2	1	3.8774E-2	1	3.12366E-2	1
	GO:0031209	SCAR complex	8.1941E-3	1	1.29188E-2	1	1.3183E-2	1	1.04278E-2	1
	GO:0031226	intrinsic to plasma membrane	2.75467E-4	1	1.8223E-5	1	8.65607E-6	1	1.23461E-4	1
	GO:0031372	UBC13-MMS2 complex	2.70263E-2	1	3.7198E-2	1	3.8774E-2	1	3.12366E-2	1
	GO:0031410	cytoplasmic vesicle	1.03892E-8	1	8.70819E-9	1	9.9883E-9	1	6.99453E-8	1
	GO:0031461	cullin-RING ubiquitin ligase complex	1.31379E-18	1	3.54612E-21	1	3.20496E-20	1	7.42964E-21	1
	GO:0031977	thylakoid lumen	1.06947E-23	1	1.0853E-21	1	9.9608E-19	1	5.14016E-21	1
	GO:0031982	vesicle	1.44283E-8	1	1.31775E-8	1	1.51237E-8	1	9.15033E-8	1
	GO:0033178	proton-transporting two-sector ATPase complex, catalytic domain	2.38423E-3	1	8.33761E-3	1	8.98582E-3	1	1.92034E-3	1
	GO:0033179	proton-transporting V-type ATPase, V0 domain	3.13524E-2	1		0		0	4.016E-2	1
	GO:0033180	proton-transporting V-type ATPase, V1 domain	1.49152E-2	1	2.2303E-2	1	2.33791E-2	1	1.79627E-2	1
	GO:0042175	nuclear outer membrane-endoplasmic reticulum membrane network	9.33917E-14	1	2.45466E-13	1	3.01531E-13	1	4.87967E-12	1
	GO:0042579	microbody	3.74634E-17	1	8.16984E-17	1	1.956E-17	1	5.74764E-18	1
	GO:0042651	thylakoid membrane	5.57221E-75	1	1.3421E-59	1	1.29839E-55	1	1.16853E-66	1
	GO:0044431	Golgi apparatus part	4.05904E-19	1	3.07689E-15	1	4.23027E-16	1	3.43992E-15	1
	GO:0044445	cytosolic part	1.41307E-44	1	5.686E-41	1	1.15669E-40	1	2.21428E-43	1
	GO:0045271	respiratory chain complex I	1.40936E-11	1	1.24489E-10	1	1.38153E-10	1	4.28172E-11	1
	GO:0046658	anchored to plasma membrane	7.25513E-6	1	1.21747E-6	1	1.3569E-6	1	1.70319E-6	1
	GO:0048046	apoplast	2.55169E-3	1		0		0	1.78017E-2	1
	GO:0048471	perinuclear region of cytoplasm	1.49152E-2	1	2.2303E-2	1	2.33791E-2	1	1.79627E-2	1
	GO:0048500	signal recognition particle	4.90997E-3	1	9.76516E-3	1	1.00662E-2	1	7.23811E-3	1
	GO:0070469	respiratory chain	1.63013E-6	1	2.29065E-5	1	2.5871E-5	1	6.94855E-6	1
	GO:0080008	CUL4 RING ubiquitin ligase complex	1.03043E-19	1	1.83097E-23	1	2.22974E-23	1	1.83583E-23	1

## Sheet: H3K27me3 targets
			adj_pvalue
	Go-Term	Go-Description	L	t_L	t0	t_t0	t2	t_t2	I	t_I
biological	GO:0000038	very long-chain fatty acid metabolic process	4.48723E-3	1	1.69778E-2	1	1.76635E-2	1	1.69787E-3	1
	GO:0000160	two-component signal transduction system (phosphorelay)	2.12109E-4	1	4.85298E-7	1	5.86895E-8	1	3.36977E-7	1
	GO:0000272	polysaccharide catabolic process	5.80949E-7	1	3.12308E-6	1	8.97508E-5	1	1.75602E-5	1
	GO:0000302	response to reactive oxygen species	1.89071E-5	1	7.17307E-7	1	1.93213E-6	1	2.59322E-7	1
	GO:0001708	cell fate specification	1.11914E-3	1	1.70474E-2	1	1.77493E-2	1	6.75093E-3	1
	GO:0005976	polysaccharide metabolic process	4.13984E-2	1		0		0		0
	GO:0005991	trehalose metabolic process	2.71917E-2	1		0		0		0
	GO:0005992	trehalose biosynthetic process	1.25458E-2	1		0		0		0
	GO:0006032	chitin catabolic process	4.52012E-8	1	5.23135E-8	1	4.64516E-7	1	8.48424E-8	1
	GO:0006629	lipid metabolic process	5.35123E-8	1	3.80845E-8	1	5.86895E-8	1	4.7345E-7	1
	GO:0006631	fatty acid metabolic process	2.77302E-2	1		0		0	4.45781E-2	1
	GO:0006633	fatty acid biosynthetic process	1.98099E-2	1	2.06379E-2	1	2.16414E-2	1	9.2986E-3	1
	GO:0006721	terpenoid metabolic process	7.27281E-5	1	1.52525E-4	1	1.48731E-4	1	1.09773E-4	1
	GO:0006725	cellular aromatic compound metabolic process	2.63596E-5	1	1.09147E-8	1	1.91192E-8	1	6.52938E-7	1
	GO:0006800	oxygen and reactive oxygen species metabolic process	9.02751E-7	1	7.62454E-8	1	2.18227E-7	1	3.7198E-8	1
	GO:0006811	ion transport		0	4.67382E-3	1	5.4854E-3	1		0
	GO:0006817	phosphate ion transport	3.16054E-2	1		0		0	4.45781E-2	1
	GO:0006820	anion transport		0	3.50732E-2	1	2.11738E-2	1		0
	GO:0006829	zinc ion transport	2.57997E-2	1	7.89131E-3	1	8.63331E-3	1	3.83987E-2	1
	GO:0006855	drug transmembrane transport	1.85502E-3	1	2.24194E-4	1	5.97117E-4	1	5.7944E-6	1
	GO:0006857	oligopeptide transport	3.30002E-2	1	1.80574E-4	1	6.62339E-5	1	1.18624E-4	1
	GO:0006865	amino acid transport		0		0		0	1.40974E-2	1
	GO:0006869	lipid transport	5.31167E-12	1	3.67906E-14	1	3.05125E-14	1	1.2538E-14	1
	GO:0006952	defense response	2.07297E-4	1	8.47017E-11	1	1.01723E-10	1	5.10284E-6	1
	GO:0006979	response to oxidative stress	2.08524E-2	1	1.17229E-3	1	1.97622E-3	1	5.21158E-4	1
	GO:0007047	cellular cell wall organization	1.72942E-18	1	2.12828E-19	1	6.14408E-18	1	1.0713E-20	1
	GO:0007242	intracellular signal transduction	2.00732E-3	1	5.56674E-3	1	2.69663E-3	1	1.80083E-4	1
	GO:0007267	cell-cell signaling	2.14145E-3	1	5.66565E-3	1	6.22901E-3	1		0
	GO:0007389	pattern specification process	6.07998E-4	1	1.61863E-2	1	4.52301E-2	1	4.67982E-4	1
	GO:0008272	sulfate transport		0	2.50177E-2	1	2.56024E-2	1	4.45781E-2	1
	GO:0008299	isoprenoid biosynthetic process	2.84771E-3	1	2.03401E-3	1	2.2631E-3	1	2.52221E-3	1
	GO:0008610	lipid biosynthetic process	1.38625E-2	1	2.56875E-2	1	4.64276E-2	1	2.10991E-2	1
	GO:0009239	enterobactin biosynthetic process		0	2.37016E-3	1	9.36833E-3	1	1.21787E-2	1
	GO:0009556	microsporogenesis	8.56055E-3	1	2.50177E-2	1	2.56024E-2	1	1.17478E-2	1
	GO:0009607	response to biotic stimulus	2.86196E-3	1	1.57357E-5	1	6.5738E-5	1	8.51106E-5	1
	GO:0009620	response to fungus		0	2.42843E-3	1	1.47313E-3	1	2.71322E-3	1
	GO:0009624	response to nematode		0		0		0	4.5558E-2	1
	GO:0009625	response to insect	4.53222E-2	1		0		0		0
	GO:0009636	response to toxin	3.99084E-3	1	1.43967E-2	1	1.54276E-2	1	9.87316E-3	1
	GO:0009653	anatomical structure morphogenesis	2.57177E-2	1		0		0	6.37825E-3	1
	GO:0009664	plant-type cell wall organization	3.39325E-3	1	1.38919E-3	1	3.19603E-3	1	5.44674E-5	1
	GO:0009690	cytokinin metabolic process	4.48723E-3	1	1.69778E-2	1	1.76635E-2	1	7.20686E-3	1
	GO:0009691	cytokinin biosynthetic process	2.86196E-3	1	7.89131E-3	1	8.52749E-3	1	3.96401E-3	1
	GO:0009698	phenylpropanoid metabolic process	7.44457E-9	1	1.62416E-11	1	1.69844E-12	1	3.03831E-10	1
	GO:0009699	phenylpropanoid biosynthetic process	1.09276E-6	1	1.4104E-9	1	1.30161E-10	1	3.38303E-8	1
	GO:0009723	response to ethylene stimulus	3.20789E-4	1	2.41759E-5	1	3.91163E-6	1	3.36977E-7	1
	GO:0009725	response to hormone stimulus	3.60835E-6	1	5.13199E-7	1	8.35362E-8	1	3.38303E-8	1
	GO:0009733	response to auxin stimulus	1.1187E-2	1	4.36255E-2	1	3.35493E-2	1	1.48826E-2	1
	GO:0009739	response to gibberellin stimulus		0	1.58042E-2	1	1.67615E-2	1	6.63573E-3	1
	GO:0009753	response to jasmonic acid stimulus	2.62384E-3	1	2.37016E-3	1	2.69663E-3	1	1.64588E-3	1
	GO:0009755	hormone-mediated signaling pathway	3.08438E-2	1	2.32147E-2	1	8.52749E-3	1	4.62191E-3	1
	GO:0009807	lignan biosynthetic process	2.81622E-4	1	9.71768E-7	1	1.04153E-6	1	5.44674E-5	1
	GO:0009808	lignin metabolic process	1.31022E-5	1	3.37397E-4	1	1.36602E-4	1	1.16712E-5	1
	GO:0009809	lignin biosynthetic process	2.39947E-2	1		0	2.6406E-2	1	1.83865E-2	1
	GO:0009813	flavonoid biosynthetic process		0	6.38946E-4	1	2.45908E-4	1	7.74987E-3	1
	GO:0009827	plant-type cell wall modification	1.04919E-2	1	2.01589E-3	1	5.74245E-3	1	3.32252E-4	1
	GO:0009828	plant-type cell wall loosening	7.81195E-3	1	2.04994E-3	1	6.62482E-3	1	4.25676E-4	1
	GO:0009834	secondary cell wall biogenesis	2.39947E-2	1		0		0	3.35041E-2	1
	GO:0009835	fruit ripening	1.47706E-2	1	7.89131E-3	1	8.52749E-3	1	1.96727E-2	1
	GO:0009851	auxin biosynthetic process	7.8226E-3	1	7.89131E-3	1	8.63331E-3	1	1.16502E-2	1
	GO:0009873	ethylene mediated signaling pathway	9.99521E-5	1	7.51686E-8	1	1.55612E-8	1	1.52168E-8	1
	GO:0009887	organ morphogenesis	2.00732E-3	1	2.56875E-2	1	2.68877E-2	1	6.02951E-5	1
	GO:0009908	flower development	3.39211E-5	1	7.89131E-3	1	1.69795E-2	1	1.87065E-4	1
	GO:0009943	adaxial/abaxial axis specification	1.08237E-2	1	3.39014E-2	1	3.3931E-2	1	1.50318E-2	1
	GO:0009944	polarity specification of adaxial/abaxial axis	3.16054E-2	1		0		0	4.45781E-2	1
	GO:0009954	proximal/distal pattern formation	7.81195E-3	1	1.49644E-2	1	1.57153E-2	1	9.12633E-3	1
	GO:0010022	meristem determinacy	4.97843E-2	1	1.98816E-2	1	2.05684E-2	1	1.11515E-2	1
	GO:0010084	specification of organ axis polarity	1.46091E-2	1	4.30126E-2	1	4.34879E-2	1	1.97668E-2	1
	GO:0010087	phloem or xylem histogenesis	4.8909E-3	1	2.36141E-2	1	2.42762E-2	1	8.66953E-3	1
	GO:0010089	xylem development	2.76309E-3	1	7.89131E-3	1	8.52749E-3	1	3.77782E-3	1
	GO:0010102	lateral root morphogenesis	2.57997E-2	1		0		0		0
	GO:0010166	wax metabolic process		0	6.84448E-3	1	7.44916E-3	1	1.17478E-2	1
	GO:0010223	secondary shoot formation	1.98099E-2	1		0		0	2.38108E-2	1
	GO:0015770	sucrose transport	2.86196E-3	1	7.89131E-3	1	8.52749E-3	1	3.96401E-3	1
	GO:0015833	peptide transport	2.04573E-2	1	1.13083E-4	1	4.21142E-5	1	2.37945E-5	1
	GO:0016042	lipid catabolic process	2.0461E-7	1	2.85122E-7	1	5.86895E-8	1	4.21648E-6	1
	GO:0016102	diterpenoid biosynthetic process	2.76309E-3	1	2.51877E-3	1	2.8424E-3	1	3.96855E-3	1
	GO:0016104	triterpenoid biosynthetic process	3.1291E-4	1	1.27113E-3	1	1.38959E-3	1	4.25676E-4	1
	GO:0016114	terpenoid biosynthetic process	2.81622E-4	1	6.38946E-4	1	6.9797E-4	1	3.32252E-4	1
	GO:0016998	cell wall macromolecule catabolic process	3.58491E-2	1		0		0		0
	GO:0019748	secondary metabolic process	4.31334E-19	1	1.40065E-19	1	6.38105E-20	1	4.98777E-20	1
	GO:0019760	glucosinolate metabolic process	1.04894E-8	1	3.17063E-7	1	3.10521E-7	1	3.38303E-8	1
	GO:0019827	stem cell maintenance		0		0		0	4.16602E-2	1
	GO:0019915	lipid storage	3.3241E-6	1	2.0759E-4	1	2.04711E-4	1	5.65582E-6	1
	GO:0019953	sexual reproduction	9.71544E-3	1	7.62104E-3	1	8.36213E-3	1	2.59301E-3	1
	GO:0030001	metal ion transport		0	1.96607E-2	1	2.68877E-2	1		0
	GO:0030154	cell differentiation	8.30354E-4	1	2.79901E-2	1	2.16898E-2	1	2.56771E-4	1
	GO:0030245	cellulose catabolic process	3.99084E-3	1	5.88577E-3	1	1.77493E-2	1	1.97668E-2	1
	GO:0042335	cuticle development	1.46091E-2	1	4.30126E-2	1	4.34879E-2	1	1.97668E-2	1
	GO:0042398	cellular modified amino acid biosynthetic process	2.25259E-6	1	2.48399E-8	1	5.01116E-9	1	2.59064E-7	1
	GO:0042493	response to drug	6.00331E-4	1	2.52105E-4	1	2.62542E-4	1	1.41572E-5	1
	GO:0042542	response to hydrogen peroxide	2.25259E-6	1	2.41375E-8	1	5.86895E-8	1	1.52168E-8	1
	GO:0042545	cell wall modification	1.08475E-11	1	9.88586E-15	1	1.4719E-13	1	1.47313E-15	1
	GO:0042547	cell wall modification involved in multidimensional cell growth		0		0		0	7.74987E-3	1
	GO:0042744	hydrogen peroxide catabolic process	8.88363E-12	1	4.97456E-14	1	3.2597E-13	1	1.47325E-14	1
	GO:0043043	peptide biosynthetic process		0	1.27049E-3	1	5.74245E-3	1	2.9843E-3	1
	GO:0045087	innate immune response		0	7.83E-3	1	1.67615E-2	1		0
	GO:0045165	cell fate commitment	4.14524E-4	1	8.48339E-3	1	9.15609E-3	1	2.8432E-3	1
	GO:0046087	cytidine metabolic process	2.86196E-3	1	7.73183E-3	1	8.36213E-3	1	3.9042E-3	1
	GO:0046274	lignin catabolic process	9.68159E-5	1	2.85899E-3	1	3.19603E-3	1	1.48332E-4	1
	GO:0048437	floral organ development	3.30655E-5	1	2.45774E-4	1	1.18565E-3	1	6.02951E-5	1
	GO:0048438	floral whorl development	6.35194E-7	1	9.59846E-6	1	1.48731E-4	1	9.87597E-7	1
	GO:0048440	carpel development	8.27689E-5	1	3.13275E-3	1	8.52749E-3	1	5.45388E-4	1
	GO:0048441	petal development	3.16054E-2	1		0		0	4.45781E-2	1
	GO:0048443	stamen development	1.46091E-2	1	1.37598E-2	1	3.13563E-2	1	2.38108E-2	1
	GO:0048467	gynoecium development	3.21242E-5	1	1.66885E-3	1	8.94288E-3	1	2.32914E-4	1
	GO:0048513	organ development	5.35123E-8	1	1.56457E-5	1	1.16607E-5	1	3.7198E-8	1
	GO:0048527	lateral root development	2.80853E-2	1		0		0		0
	GO:0048569	post-embryonic organ development	4.1281E-5	1	3.11731E-4	1	1.4692E-3	1	7.89993E-5	1
	GO:0048645	organ formation	2.05359E-2	1		0		0	1.20193E-2	1
	GO:0048825	cotyledon development	2.86196E-3	1	4.84398E-3	1	5.4854E-3	1	1.41254E-3	1
	GO:0050832	defense response to fungus		0	1.70474E-2	1	9.51938E-3	1	1.15809E-2	1
	GO:0051260	protein homooligomerization	1.03477E-4	1	1.13083E-4	1	3.84839E-5	1	3.03246E-6	1
	GO:0051707	response to other organism		0	7.89131E-3	1	1.97141E-2	1	1.97668E-2	1
molcular	GO:0003993	acid phosphatase activity	1.17718E-2	1		0		0		0
	GO:0004022	alcohol dehydrogenase (NAD) activity		0	3.53899E-2	1		0		0
	GO:0004091	carboxylesterase activity	8.94132E-30	1	7.07158E-38	1	3.182E-38	1	2.91938E-33	1
	GO:0004126	cytidine deaminase activity	8.54788E-4	1	2.45055E-3	1	2.57039E-3	1	1.23021E-3	1
	GO:0004180	carboxypeptidase activity		0	3.45118E-2	1	2.80777E-3	1		0
	GO:0004185	serine-type carboxypeptidase activity	2.65507E-2	1	3.63919E-3	1	1.13084E-4	1	2.7725E-2	1
	GO:0004497	monooxygenase activity	5.28949E-20	1	1.47728E-32	1	2.58934E-31	1	4.26141E-30	1
	GO:0004499	N,N-dimethylaniline monooxygenase activity	7.67586E-3	1	5.43447E-4	1	1.63914E-3	1	2.48826E-5	1
	GO:0004553	hydrolase activity, hydrolyzing O-glycosyl compounds	4.8135E-17	1	6.28099E-17	1	1.98758E-15	1	1.75523E-16	1
	GO:0004568	chitinase activity	1.78738E-8	1	3.16378E-8	1	3.87775E-7	1	5.21875E-8	1
	GO:0004601	peroxidase activity	1.22713E-11	1	1.15661E-14	1	9.82108E-13	1	1.30693E-14	1
	GO:0004650	polygalacturonase activity	6.10631E-8	1	2.41673E-5	1	7.80246E-6	1	5.25958E-6	1
	GO:0004811	tRNA dimethylallyltransferase activity	8.41628E-3	1	1.76889E-2	1	1.71343E-2	1	1.1024E-2	1
	GO:0004857	enzyme inhibitor activity	2.56249E-20	1	6.96451E-26	1	8.04485E-26	1	5.9005E-25	1
	GO:0004866	endopeptidase inhibitor activity		0	3.53899E-2	1	3.57039E-2	1		0
	GO:0004888	transmembrane signaling receptor activity		0	4.03595E-4	1	1.60145E-4	1	4.75758E-3	1
	GO:0005102	receptor binding	2.83761E-3	1	3.45118E-2	1	1.03924E-2	1	1.29049E-2	1
	GO:0005199	structural constituent of cell wall	5.17894E-8	1	6.2791E-5	1	6.29203E-5	1	3.14982E-8	1
	GO:0005275	amine transmembrane transporter activity		0		0		0	3.45038E-2	1
	GO:0005351	sugar:hydrogen symporter activity	2.51869E-3	1		0	3.59479E-2	1	3.62295E-2	1
	GO:0005385	zinc ion transmembrane transporter activity	3.90722E-2	1	7.98128E-4	1	8.55247E-4	1		0
	GO:0005506	iron ion binding	2.35737E-26	1	4.53201E-34	1	1.10596E-32	1	5.43802E-30	1
	GO:0005507	copper ion binding	1.11693E-7	1	3.8134E-8	1	4.62196E-8	1	1.33359E-7	1
	GO:0005509	calcium ion binding	6.39902E-3	1	2.63293E-3	1	4.0247E-3	1	3.20354E-3	1
	GO:0005529	carbohydrate binding		0	4.23187E-2	1		0		0
	GO:0008061	chitin binding	7.67586E-3	1	2.68811E-3	1	1.63577E-2	1	9.5512E-3	1
	GO:0008146	sulfotransferase activity	1.03943E-2	1	8.62138E-3	1	2.46724E-3	1	1.49044E-2	1
	GO:0008171	O-methyltransferase activity		0	1.71518E-2	1	6.49723E-3	1	1.69628E-2	1
	GO:0008194	UDP-glycosyltransferase activity		0	3.63919E-3	1	1.7561E-2	1	2.3878E-2	1
	GO:0008236	serine-type peptidase activity		0		0	1.81872E-2	1		0
	GO:0008271	secondary active sulfate transmembrane transporter activity		0	6.89711E-3	1	6.74403E-3	1	3.6724E-3	1
	GO:0008289	lipid binding	2.30014E-5	1	6.2791E-5	1	1.30471E-4	1	8.1465E-6	1
	GO:0008324	cation transmembrane transporter activity		0	3.96076E-2	1	4.17445E-2	1		0
	GO:0008471	laccase activity	8.88184E-5	1	2.50682E-3	1	2.57039E-3	1	1.47583E-4	1
	GO:0008515	sucrose transmembrane transporter activity	3.01078E-3	1	6.89711E-3	1	6.74403E-3	1	3.88736E-3	1
	GO:0008667	2,3-dihydro-2,3-dihydroxybenzoate dehydrogenase activity		0	2.05981E-3	1	7.87943E-3	1	1.23835E-2	1
	GO:0008794	arsenate reductase (glutaredoxin) activity	4.64996E-2	1		0		0		0
	GO:0008810	cellulase activity	3.9154E-4	1	5.76398E-4	1	2.57039E-3	1	3.20354E-3	1
	GO:0009672	auxin:hydrogen symporter activity		0	2.91344E-2	1	6.49723E-3	1		0
	GO:0009815	1-aminocyclopropane-1-carboxylate oxidase activity		0	3.45118E-2	1	6.74403E-3	1		0
	GO:0009824	AMP dimethylallyltransferase activity	3.01078E-3	1	6.55154E-3	1	6.49723E-3	1	3.78082E-3	1
	GO:0009922	fatty acid elongase activity	2.79774E-2	1	4.70886E-2	1	4.85291E-2	1	3.38089E-2	1
	GO:0010294	abscisic acid glucosyltransferase activity		0	4.70886E-2	1		0		0
	GO:0015075	ion transmembrane transporter activity		0	5.95626E-3	1	5.00819E-3	1		0
	GO:0015103	inorganic anion transmembrane transporter activity	2.87002E-4	1	2.82529E-4	1	2.91604E-4	1	3.07764E-4	1
	GO:0015112	nitrate transmembrane transporter activity	1.43624E-2	1	6.89711E-3	1	6.74403E-3	1	3.6724E-3	1
	GO:0015114	phosphate ion transmembrane transporter activity	3.77429E-2	1		0		0		0
	GO:0015116	sulfate transmembrane transporter activity		0	6.55154E-3	1	6.49723E-3	1	1.49044E-2	1
	GO:0015144	carbohydrate transmembrane transporter activity	1.03943E-2	1		0		0		0
	GO:0015238	drug transmembrane transporter activity	1.8732E-2	1	8.17972E-3	1	2.57039E-3	1	1.21621E-3	1
	GO:0015250	water channel activity		0	1.37057E-3	1	4.21393E-4	1	1.21621E-3	1
	GO:0015293	symporter activity	6.42728E-6	1	5.11649E-5	1	1.64827E-5	1	1.20934E-5	1
	GO:0015297	antiporter activity	2.90804E-4	1	6.48272E-6	1	1.30547E-6	1	1.77274E-5	1
	GO:0015299	solute:hydrogen antiporter activity	2.78775E-3	1	1.54641E-4	1	6.29203E-5	1	3.20354E-3	1
	GO:0015491	cation:cation antiporter activity	1.17718E-2	1	1.54641E-4	1	1.53532E-4	1	5.85235E-3	1
	GO:0016165	lipoxygenase activity	8.97958E-3	1	1.73294E-2	1	1.67602E-2	1		0
	GO:0016298	lipase activity	2.62144E-5	1	1.01099E-4	1	5.26778E-5	1	3.23907E-4	1
	GO:0016628	oxidoreductase activity, acting on the CH-CH group of donors, NAD or NADP as acceptor		0	8.17972E-3	1	2.56281E-2	1		0
	GO:0016679	oxidoreductase activity, acting on diphenols and related substances as donors	4.52528E-2	1		0		0		0
	GO:0016682	oxidoreductase activity, acting on diphenols and related substances as donors, oxygen as acceptor	2.93691E-4	1	1.81421E-2	1	1.7561E-2	1	2.46825E-3	1
	GO:0016701	oxidoreductase activity, acting on single donors with incorporation of molecular oxygen	1.02888E-4	1	2.41673E-5	1	2.39736E-5	1	1.25774E-4	1
	GO:0016702	oxidoreductase activity, acting on single donors with incorporation of molecular oxygen, incorporation of two atoms of oxygen	1.01512E-4	1	3.91323E-5	1	3.72951E-5	1	3.33807E-5	1
	GO:0016705	oxidoreductase activity, acting on paired donors, with incorporation or reduction of molecular oxygen	1.60934E-9	1	4.87707E-10	1	5.3459E-10	1	3.83283E-12	1
	GO:0016706	oxidoreductase activity, acting on paired donors, with incorporation or reduction of molecular oxygen, 2-oxoglutarate as one donor, and incorporation of one atom each of oxygen into both donors	1.98678E-4	1	6.2791E-5	1	2.53642E-5	1	3.50514E-5	1
	GO:0016709	oxidoreductase activity, acting on paired donors, with incorporation or reduction of molecular oxygen, NADH or NADPH as one donor, and incorporation of one atom of oxygen	6.4084E-4	1	1.93953E-4	1	5.05857E-4	1	6.33184E-6	1
	GO:0016717	oxidoreductase activity, acting on paired donors, with oxidation of a pair of donors resulting in the reduction of molecular oxygen to two molecules of water	1.17718E-2	1	1.25003E-2	1	1.24841E-2	1	5.37845E-3	1
	GO:0016746	transferase activity, transferring acyl groups		0	3.99537E-2	1	1.56474E-2	1	1.8498E-2	1
	GO:0016747	transferase activity, transferring acyl groups other than amino-acyl groups	2.91547E-2	1	3.69378E-2	1	1.33645E-2	1	1.49044E-2	1
	GO:0016757	transferase activity, transferring glycosyl groups	1.65587E-2	1	1.02045E-3	1	5.64722E-3	1	2.44477E-3	1
	GO:0016758	transferase activity, transferring hexosyl groups	8.40418E-3	1	5.76398E-4	1	4.10907E-3	1	9.56468E-4	1
	GO:0016762	xyloglucan:xyloglucosyl transferase activity	3.79029E-3	1	1.54641E-4	1	6.40812E-4	1	6.34964E-4	1
	GO:0016798	hydrolase activity, acting on glycosyl bonds	6.02644E-16	1	3.40099E-15	1	8.48782E-14	1	5.64342E-15	1
	GO:0016829	lyase activity	3.7529E-4	1	5.76398E-4	1	9.6433E-4	1	9.56468E-4	1
	GO:0016838	carbon-oxygen lyase activity, acting on phosphates	1.09699E-2	1		0		0		0
	GO:0016847	1-aminocyclopropane-1-carboxylate synthase activity	3.90722E-2	1		0		0		0
	GO:0019239	deaminase activity	4.64996E-2	1		0		0		0
	GO:0019825	oxygen binding	5.14228E-21	1	9.6985E-34	1	3.17737E-32	1	1.76631E-28	1
	GO:0020037	heme binding	8.94132E-30	1	6.14829E-43	1	1.08439E-39	1	1.57149E-37	1
	GO:0030246	carbohydrate binding		0	6.0233E-3	1	2.73701E-2	1	7.89739E-3	1
	GO:0030414	peptidase inhibitor activity	2.13244E-2	1	6.12115E-3	1	6.4048E-3	1	1.13499E-2	1
	GO:0030570	pectate lyase activity	7.00661E-3	1	2.47621E-3	1	2.57039E-3	1	3.20354E-3	1
	GO:0030599	pectinesterase activity	3.00778E-29	1	3.05066E-36	1	3.53034E-36	1	1.24905E-35	1
	GO:0031559	oxidosqualene cyclase activity	5.19148E-6	1	3.31795E-5	1	3.09158E-5	1	9.65482E-6	1
	GO:0034768	(E)-beta-ocimene synthase activity	7.67586E-3	1	1.27049E-2	1	1.26087E-2	1	9.117E-3	1
	GO:0035251	UDP-glucosyltransferase activity		0	3.42302E-2	1		0	2.7725E-2	1
	GO:0042299	lupeol synthase activity	7.67586E-3	1	1.27049E-2	1	1.26087E-2	1	9.117E-3	1
	GO:0043565	sequence-specific DNA binding	6.74428E-16	1	1.13464E-14	1	6.74421E-15	1	3.23644E-17	1
	GO:0045330	aspartyl esterase activity	9.01864E-13	1	4.33075E-16	1	5.07997E-16	1	3.58018E-16	1
	GO:0045431	flavonol synthase activity		0	1.73294E-2	1	1.67602E-2	1	1.12672E-2	1
	GO:0045544	gibberellin 20-oxidase activity		0	1.27049E-2	1	1.26087E-2	1		0
	GO:0045551	cinnamyl-alcohol dehydrogenase activity	4.8002E-3	1	2.68336E-3	1	2.77807E-3	1	1.21621E-3	1
	GO:0046906	tetrapyrrole binding	9.18312E-26	1	1.95105E-38	1	2.37482E-37	1	1.1528E-32	1
	GO:0046910	pectinesterase inhibitor activity	2.52332E-15	1	2.33564E-20	1	2.5072E-20	1	4.70671E-18	1
	GO:0050551	myrcene synthase activity	7.67586E-3	1	1.27049E-2	1	1.26087E-2	1	9.117E-3	1
	GO:0050660	flavin adenine dinucleotide binding	3.97869E-8	1	2.81753E-8	1	7.31636E-8	1	8.41764E-10	1
	GO:0050661	NADP binding		0		0		0	9.252E-3	1
	GO:0050664	oxidoreductase activity, acting on NADH or NADPH, oxygen as acceptor	1.8732E-2	1	6.89711E-3	1	6.74403E-3	1	2.46659E-2	1
	GO:0051119	sugar transmembrane transporter activity	7.76873E-3	1		0		0		0
	GO:0051213	dioxygenase activity	2.03096E-4	1	8.29267E-5	1	8.28664E-5	1	7.53886E-5	1
cellular	GO:0005618	cell wall	2.92115E-5	1	6.02802E-7	1	1.11634E-6	1	1.46419E-6	1
	GO:0005811	lipid particle	1.52997E-5	1	5.78099E-5	1	5.89291E-5	1	1.42806E-6	1
	GO:0009505	plant-type cell wall	1.94214E-4	1	1.40767E-7	1	7.08436E-8	1	1.3757E-6	1
	GO:0012511	monolayer-surrounded lipid storage body	1.52997E-5	1	5.78099E-5	1	5.89291E-5	1	1.42806E-6	1
	GO:0031012	extracellular matrix		0	8.97338E-3	1	9.12711E-3	1	1.05017E-2	1
	GO:0031225	anchored to membrane	4.00002E-3	1	8.43373E-4	1	2.84382E-4	1	2.30605E-3	1
	GO:0048046	apoplast	2.92115E-5	1	2.50983E-8	1	6.78529E-9	1	1.42806E-6	1
