# Supplementary material
Source: MDPI journal article supplement (https://www.mdpi.com/2075-4655/1/2/8)
Supplement: s1 [file s1 › Supplementary/Tables-S1to6/Table_S6.xls]

## Sheet: H3K4me3 up
			adj_pvalue
	Go-Term	Go-Description	L-t0	t_{L_t0}	L-I	t_{L_I}	t0-t2	t_{t0_t2}	t0-I	t_{t0_I}	t2-I	t_{t2_I}
biological	GO:0006260	DNA replication	0.00078076	1	0.00606627	1		0		0		0
	GO:0007017	microtubule-based process	3.65341e-05	1	2.25379e-06	1		0		0		0
	GO:0007018	microtubule-based movement	3.65341e-05	1	6.34939e-08	1		0		0		0
	GO:0007049	cell cycle	3.65341e-05	1	0.000692022	1		0		0		0
	GO:0007169	transmembrane receptor protein tyrosine kinase signaling pathway	0.00190069	1	3.81258e-05	1		0		0		0
	GO:0007389	pattern specification process	0.0406	1	0.00684106	1		0		0		0
	GO:0009653	anatomical structure morphogenesis	9.81881e-05	1	1.05012e-05	1		0		0		0
	GO:0009887	organ morphogenesis	0.0170561	1	0.0138755	1		0		0		0
	GO:0022621	shoot system development	0.00473849	1		0		0		0		0
	GO:0030154	cell differentiation	0.00603426	1	0.00234563	1	0.00667448	1		0		0
	GO:0042254	ribosome biogenesis	0.00282129	1		0		0		0		0
	GO:0048367	shoot development	0.00464936	1		0		0		0		0
	GO:0048438	floral whorl development	0.0387555	1	0.0247461	1	0.00358326	1		0		0
	GO:0048507	meristem development	0.0316709	1	0.00653917	1		0		0		0
	GO:0048513	organ development	3.65341e-05	1	0.000348829	1	0.00236835	1		0		0
	GO:0048589	developmental growth	0.0229468	1	0.0159938	1		0		0		0
	GO:0048827	phyllome development	0.0242199	1		0		0		0		0
	GO:0051301	cell division	7.05975e-05	1	1.64659e-05	1		0		0		0
	GO:0051726	regulation of cell cycle	0.00307739	1	0.0197056	1		0		0		0
	GO:0006281	DNA repair	0.0448055	1		0		0		0	0.0177929	-1
	GO:0006974	response to DNA damage stimulus	0.0266303	1		0		0		0	0.0306144	-1
	GO:0006259	DNA metabolic process	9.29639e-06	1	0.000190859	1		0	0.0307092	-1	0.00382451	-1
	GO:0006412	translation	0.0406	1		0		0	0.00124725	-1	0.000553936	-1
	GO:0005975	carbohydrate metabolic process		0		0		0	0.0249482	1	0.0125938	1
	GO:0006915	apoptotic process		0		0		0	7.75066e-09	1	7.4525e-11	1
	GO:0006955	immune response		0		0		0	0.00318701	1	0.00017023	1
	GO:0008037	cell recognition		0		0		0	0.00460647	1	0.00474319	1
	GO:0009266	response to temperature stimulus		0		0		0	0.0154689	1	0.0335867	1
	GO:0009314	response to radiation		0		0		0	0.000112274	1	0.000202501	1
	GO:0009409	response to cold		0		0		0	0.00308804	1	0.0115517	1
	GO:0009416	response to light stimulus		0		0		0	6.43632e-05	1	0.000126155	1
	GO:0009628	response to abiotic stimulus		0		0		0	1.25563e-05	1	6.50638e-05	1
	GO:0009631	cold acclimation		0		0		0	0.00956315	1	0.0295373	1
	GO:0009637	response to blue light		0		0		0	0.00442003	1	0.000101477	1
	GO:0009644	response to high light intensity		0		0		0	0.0115564	1	0.0291275	1
	GO:0009753	response to jasmonic acid stimulus		0		0		0	0.02716	1	0.0485698	1
	GO:0009765	photosynthesis, light harvesting		0		0		0	9.19953e-05	1	7.26154e-06	1
	GO:0009773	photosynthetic electron transport in photosystem I		0		0		0	0.0153897	1	0.00407298	1
	GO:0009853	photorespiration		0		0		0	0.00177514	1	0.00153871	1
	GO:0009875	pollen-pistil interaction		0		0		0	0.00108477	1	0.00061999	1
	GO:0010033	response to organic substance		0		0		0	0.00862614	1	0.0212423	1
	GO:0010114	response to red light		0		0		0	0.00252608	1	0.000319912	1
	GO:0010218	response to far red light		0		0		0	0.00566237	1	0.00210131	1
	GO:0015977	carbon fixation		0		0		0	0.00124725	1	0.00368211	1
	GO:0016051	carbohydrate biosynthetic process		0		0		0	0.0215518	1	0.0212423	1
	GO:0019253	reductive pentose-phosphate cycle		0		0		0	0.00109983	1	0.000682931	1
	GO:0019685	photosynthesis, dark reaction		0		0		0	0.0012808	1	0.000973494	1
	GO:0019760	glucosinolate metabolic process		0		0		0	0.00460647	1	0.000373692	1
	GO:0048544	recognition of pollen		0		0		0	0.00124725	1	0.000940674	1
	GO:0006633	fatty acid biosynthetic process		0	0.00422374	1		0	0.0312382	1		0
	GO:0006857	oligopeptide transport		0		0		0	0.038916	1		0
	GO:0008610	lipid biosynthetic process		0		0		0	0.0210146	1		0
	GO:0009605	response to external stimulus		0		0		0	0.0416398	1		0
	GO:0010205	photoinhibition		0		0		0	0.0230553	1		0
	GO:0015833	peptide transport		0		0		0	0.0451877	1		0
	GO:0007047	cellular cell wall organization		0	0.00223867	1		0		0	0.0407964	1
	GO:0009063	cellular amino acid catabolic process		0		0		0		0	0.0212423	1
	GO:0009638	phototropism		0		0		0		0	0.0215003	1
	GO:0018298	protein-chromophore linkage		0		0		0		0	0.0125938	1
	GO:0000278	mitotic cell cycle		0	0.0266325	1		0		0		0
	GO:0005991	trehalose metabolic process		0		0	0.00731846	1		0		0
	GO:0005992	trehalose biosynthetic process		0		0	0.00662798	1		0		0
	GO:0006351	transcription, DNA-dependent		0		0	0.00645985	1		0		0
	GO:0006355	regulation of transcription, DNA-dependent		0		0	0.00354495	1		0		0
	GO:0006631	fatty acid metabolic process		0	0.0110057	1		0		0		0
	GO:0006725	cellular aromatic compound metabolic process		0		0	0.0477252	1		0		0
	GO:0007010	cytoskeleton organization		0	0.0197056	1		0		0		0
	GO:0007166	cell surface receptor signaling pathway		0	0.0163812	1		0		0		0
	GO:0009239	enterobactin biosynthetic process		0		0	0.0347791	1		0		0
	GO:0009311	oligosaccharide metabolic process		0		0	0.0149827	1		0		0
	GO:0009312	oligosaccharide biosynthetic process		0		0	0.00645985	1		0		0
	GO:0009725	response to hormone stimulus		0		0	0.00731846	1		0		0
	GO:0009737	response to abscisic acid stimulus		0		0	0.00645985	1		0		0
	GO:0009738	abscisic acid mediated signaling pathway		0		0	0.016845	1		0		0
	GO:0009739	response to gibberellin stimulus		0		0	0.026365	1		0		0
	GO:0009791	post-embryonic development		0		0	0.0044245	1		0		0
	GO:0009828	plant-type cell wall loosening		0	0.0280538	1		0		0		0
	GO:0009908	flower development		0		0	5.47977e-06	1		0		0
	GO:0009933	meristem structural organization		0	0.0222249	1		0		0		0
	GO:0010103	stomatal complex morphogenesis		0	0.0197056	1		0		0		0
	GO:0010187	negative regulation of seed germination		0		0	0.0149827	1		0		0
	GO:0010374	stomatal complex development		0	0.0134433	1		0		0		0
	GO:0042547	cell wall modification involved in multidimensional cell growth		0	0.0159938	1		0		0		0
	GO:0048437	floral organ development		0		0	9.23678e-05	1		0		0
	GO:0048440	carpel development		0		0	0.000886319	1		0		0
	GO:0048467	gynoecium development		0		0	0.00182252	1		0		0
	GO:0048569	post-embryonic organ development		0		0	9.23678e-05	1		0		0
	GO:0051252	regulation of RNA metabolic process		0		0	0.00354495	1		0		0
	GO:0006397	mRNA processing		0		0		0		0	0.0177929	-1
	GO:0051276	chromosome organization		0		0		0		0	0.000549356	-1
	GO:0008380	RNA splicing		0		0		0	0.0153897	-1		0
	GO:0016071	mRNA metabolic process		0		0		0	0.022927	-1		0
	GO:0006325	chromatin organization		0		0		0	0.0154689	-1	0.000344564	-1
	GO:0006396	RNA processing		0		0		0	0.00176793	-1	2.38723e-05	-1
	GO:0016568	chromatin modification		0		0		0	0.0184913	-1	0.0177929	-1
	GO:0006952	defense response	0.0164768	-1		0		0	8.03788e-08	1	1.98537e-12	1
	GO:0008219	cell death	0.00494016	-1	0.0155603	-1		0	6.19428e-07	1	1.87723e-08	1
	GO:0009414	response to water deprivation	0.0448228	-1		0		0	0.00442003	1	0.0177929	1
	GO:0009415	response to water	0.0316709	-1		0		0	0.00318701	1	0.0126711	1
	GO:0009767	photosynthetic electron transport chain	0.0356587	-1		0		0	0.000130573	1	0.000373692	1
	GO:0012501	programmed cell death	0.00421618	-1	0.00795083	-1		0	1.27193e-07	1	3.84022e-09	1
	GO:0015979	photosynthesis	0.000560558	-1		0		0	8.06495e-13	1	1.02264e-13	1
	GO:0019684	photosynthesis, light reaction	0.00043727	-1		0		0	1.41301e-08	1	1.47529e-08	1
	GO:0022900	electron transport chain	0.0316709	-1		0		0	0.0227331	1	0.0312334	1
	GO:0045087	innate immune response	0.0459574	-1		0		0	0.00149247	1	5.42046e-05	1
	GO:0055114	oxidation-reduction process	0.0452407	-1		0		0	3.64771e-09	1	1.77299e-07	1
	GO:0006470	protein dephosphorylation	0.0356587	-1		0		0		0		0
	GO:0009607	response to biotic stimulus	0.00407203	-1		0		0		0		0
	GO:0009617	response to bacterium	7.05975e-05	-1	0.00552034	-1		0		0		0
	GO:0009867	jasmonic acid mediated signaling pathway	0.0356587	-1		0		0		0		0
	GO:0016311	dephosphorylation	0.0357771	-1		0		0		0		0
	GO:0042742	defense response to bacterium	0.000560558	-1	0.0306427	-1		0		0		0
	GO:0048193	Golgi vesicle transport	0.026777	-1	0.0445631	-1		0		0		0
	GO:0051707	response to other organism	0.000717461	-1		0		0		0		0
	GO:0006508	proteolysis	0.0118934	-1	0.00937614	-1		0		0	0.0212423	-1
	GO:0030163	protein catabolic process	0.007065	-1	0.00653917	-1		0		0	0.0170185	-1
	GO:0006886	intracellular protein transport	0.000890745	-1	0.000366941	-1		0	0.00425057	-1	0.00287127	-1
	GO:0008104	protein localization	0.000723883	-1	0.000175468	-1		0	0.00108923	-1	0.000148595	-1
	GO:0015031	protein transport	0.000551501	-1	0.000337409	-1		0	0.00124725	-1	0.000148595	-1
	GO:0016192	vesicle-mediated transport	7.05975e-05	-1	6.66359e-06	-1		0	0.00196112	-1	0.0103471	-1
	GO:0019941	modification-dependent protein catabolic process	0.0019282	-1	0.000152072	-1		0	0.022927	-1	0.000394578	-1
	GO:0034613	cellular protein localization	0.00142852	-1	0.000366941	-1		0	0.00489455	-1	0.0047715	-1
	GO:0046907	intracellular transport	0.0003251	-1	5.33654e-05	-1		0	9.19953e-05	-1	0.00017023	-1
	GO:0051603	proteolysis involved in cellular protein catabolic process	0.00142852	-1	0.000130261	-1		0	0.0192609	-1	0.000394578	-1
	GO:0051641	cellular localization	0.000723883	-1	5.74957e-05	-1		0	0.00387945	-1	0.0212423	-1
molecular	GO:0003774	motor activity	0.00791856	1	0.00210681	1		0		0		0
	GO:0003777	microtubule motor activity	0.000700829	1	1.09281e-05	1		0		0		0
	GO:0003735	structural constituent of ribosome	3.40099e-06	1		0		0	0.0107384	-1	0.00270018	-1
	GO:0003700	sequence-specific DNA binding transcription factor activity		0		0	8.8807e-06	1	0.0313505	1	0.000231589	1
	GO:0004497	monooxygenase activity		0		0	0.0403218	1	5.8286e-10	1	2.64259e-09	1
	GO:0004871	signal transducer activity		0		0		0	0.0377743	1	0.000102036	1
	GO:0004872	receptor activity		0		0		0	0.00785713	1	2.83592e-05	1
	GO:0004888	transmembrane signaling receptor activity		0		0		0	3.65466e-05	1	9.04798e-08	1
	GO:0005506	iron ion binding		0		0		0	9.82186e-07	1	3.39198e-06	1
	GO:0005529	carbohydrate binding		0		0		0	0.000753008	1	0.000189773	1
	GO:0008146	sulfotransferase activity		0		0		0	0.0111945	1	0.00962819	1
	GO:0016168	chlorophyll binding		0		0		0	0.00234391	1	0.000113793	1
	GO:0016491	oxidoreductase activity		0		0		0	6.9799e-08	1	1.04313e-05	1
	GO:0019825	oxygen binding		0		0	0.0279516	1	2.2707e-08	1	8.0312e-08	1
	GO:0020037	heme binding		0		0	0.0341606	1	5.58641e-08	1	8.0312e-08	1
	GO:0030246	carbohydrate binding		0		0		0	0.0377743	1	0.0199248	1
	GO:0046906	tetrapyrrole binding		0		0	0.0464572	1	8.54616e-11	1	1.28381e-11	1
	GO:0008194	UDP-glycosyltransferase activity		0		0		0	0.017745	1		0
	GO:0016705	oxidoreductase activity, acting on paired donors, with incorporation or reduction of molecular oxygen		0		0		0	0.0377743	1		0
	GO:0016717	oxidoreductase activity, acting on paired donors, with oxidation of a pair of donors resulting in the reduction of molecular oxygen to two molecules of water		0		0		0	0.0447157	1		0
	GO:0016984	ribulose-bisphosphate carboxylase activity		0		0		0	0.030712	1		0
	GO:0035251	UDP-glucosyltransferase activity		0		0		0	0.0185007	1		0
	GO:0046527	glucosyltransferase activity		0		0		0	0.017745	1		0
	GO:0080044	quercetin 7-O-glucosyltransferase activity		0		0		0	0.030712	1		0
	GO:0080046	quercetin 4'-O-glucosyltransferase activity		0		0		0	0.0377743	1		0
	GO:0004565	beta-galactosidase activity		0		0		0		0	0.0378007	1
	GO:0003825	alpha,alpha-trehalose-phosphate synthase (UDP-forming) activity		0		0	0.0464572	1		0		0
	GO:0004553	hydrolase activity, hydrolyzing O-glycosyl compounds		0	0.0402236	1		0		0		0
	GO:0004805	trehalose-phosphatase activity		0		0	0.0464572	1		0		0
	GO:0005199	structural constituent of cell wall		0	0.00665853	1		0		0		0
	GO:0005351	sugar:hydrogen symporter activity		0		0	0.0464572	1		0		0
	GO:0008667	2,3-dihydro-2,3-dihydroxybenzoate dehydrogenase activity		0		0	0.0464572	1		0		0
	GO:0015293	symporter activity		0		0	0.0279516	1		0		0
	GO:0016798	hydrolase activity, acting on glycosyl bonds		0	0.0439543	1		0		0		0
	GO:0043565	sequence-specific DNA binding		0		0	3.78905e-05	1		0		0
	GO:0046983	protein dimerization activity		0		0	0.0451158	1		0		0
	GO:0004518	nuclease activity		0		0		0		0	0.000967273	-1
	GO:0016874	ligase activity		0		0		0	0.0377743	-1		0
	GO:0003723	RNA binding		0		0		0	0.0068161	-1	0.000189773	-1
cellular	GO:0005618	cell wall	0.00174863	1	0.000776507	1		0		0		0
	GO:0005840	ribosome	3.41068e-06	1		0		0		0		0
	GO:0005856	cytoskeleton	0.000531364	1	2.31063e-05	1		0		0		0
	GO:0015630	microtubule cytoskeleton	8.96368e-06	1	6.94089e-07	1		0		0		0
	GO:0022626	cytosolic ribosome	7.2036e-08	1	0.0348562	1		0		0		0
	GO:0031225	anchored to membrane	0.00305394	1	8.36835e-06	1		0		0		0
	GO:0031226	intrinsic to plasma membrane	0.0245311	1	0.0228118	1		0		0		0
	GO:0046658	anchored to plasma membrane	0.0129972	1	0.00658151	1		0		0		0
	GO:0005694	chromosome	0.0336417	1	0.0391244	1		0		0	0.0024929	-1
	GO:0005829	cytosol	0.0330126	1		0		0	0.000774735	-1	0.000461909	-1
	GO:0030529	ribonucleoprotein complex	0.000358796	1		0	0.01099	-1	0.021252	-1	0.0172634	-1
	GO:0044445	cytosolic part	1.30377e-07	1	0.0391244	1		0	0.0158582	-1	0.00507896	-1
	GO:0009523	photosystem II		0		0		0	3.31148e-05	1	9.37701e-06	1
	GO:0010598	NAD(P)H dehydrogenase complex (plastoquinone)		0		0		0	0.0116799	1	0.00233341	1
	GO:0030076	light-harvesting complex		0		0		0	0.000774735	1	4.42021e-05	1
	GO:0048046	apoplast		0		0		0	1.06892e-10	1	7.53437e-12	1
	GO:0005960	glycine cleavage complex		0		0		0		0	0.0288567	1
	GO:0000502	proteasome complex		0	0.0112983	-1		0		0		0
	GO:0000151	ubiquitin ligase complex		0		0		0		0	0.0407593	-1
	GO:0005768	endosome		0		0		0	0.0425793	-1		0
	GO:0016023	cytoplasmic membrane-bounded vesicle		0		0		0	0.0425793	-1		0
	GO:0031410	cytoplasmic vesicle		0		0		0	0.0119614	-1		0
	GO:0031982	vesicle		0		0		0	0.0119614	-1		0
	GO:0009521	photosystem	0.0260674	-1		0		0	4.97701e-08	1	3.42071e-09	1
	GO:0009522	photosystem I	0.0246365	-1		0		0	3.31148e-05	1	3.36289e-07	1
	GO:0009579	thylakoid	2.27079e-11	-1	3.28283e-05	-1		0	1.69403e-11	1	1.60741e-11	1
	GO:0042651	thylakoid membrane	3.55324e-11	-1	2.9474e-05	-1		0	1.69403e-11	1	1.60741e-11	1
	GO:0031977	thylakoid lumen	0.0244343	-1		0		0	0.0231953	1		0
	GO:0000325	plant-type vacuole	0.0331615	-1		0		0		0		0
	GO:0005773	vacuole	7.4205e-06	-1	0.0228118	-1		0		0		0
	GO:0005777	peroxisome	0.0129972	-1		0		0		0		0
	GO:0005783	endoplasmic reticulum	0.0196722	-1		0		0		0		0
	GO:0005794	Golgi apparatus	0.015711	-1		0		0		0		0
	GO:0008287	protein serine/threonine phosphatase complex	0.0222824	-1		0		0		0		0
	GO:0016469	proton-transporting two-sector ATPase complex	0.0330126	-1		0		0		0		0
	GO:0019866	organelle inner membrane	0.0129972	-1	0.0147372	-1		0		0		0
	GO:0042579	microbody	0.0129972	-1		0		0		0		0
	GO:0044431	Golgi apparatus part	0.00905859	-1		0		0		0	0.0113691	-1

## Sheet: H3K27me3 down
			adj_pvalue
	Go-Term	Go-Description	L-I	t_{L_I}	t0-t2	t_{t0_t2}
biological	GO:0006139	nucleobase-containing compound metabolic process	0.000183315	1		0
	GO:0006350	transcription, DNA-dependent	0.000325449	1	0.000497048	1
	GO:0006351	transcription, DNA-dependent	0.0446175	1	0.034607	1
	GO:0006355	regulation of transcription, DNA-dependent	0.0446043	1	0.033056	1
	GO:0007275	multicellular organismal development	0.013891	1	0.00184129	1
	GO:0009059	macromolecule biosynthetic process	0.00253108	1		0
	GO:0010468	regulation of gene expression	0.000213422	1	0.000497048	1
	GO:0016070	RNA metabolic process	0.0483657	1		0
	GO:0045449	regulation of transcription, DNA-dependent	0.000183315	1	0.000497048	1
	GO:0051171	regulation of nitrogen compound metabolic process	0.000183315	1	0.000497048	1
	GO:0051252	regulation of RNA metabolic process	0.0446043	1	0.033056	1
	GO:0009653	anatomical structure morphogenesis		0	0.0113749	1
	GO:0009791	post-embryonic development		0	0.000316445	1
	GO:0009887	organ morphogenesis		0	0.0173866	1
	GO:0009908	flower development		0	0.000398659	1
	GO:0009933	meristem structural organization		0	0.0358503	1
	GO:0009942	longitudinal axis specification		0	0.0200783	1
	GO:0010074	maintenance of meristem identity		0	0.0240015	1
	GO:0019827	stem cell maintenance		0	0.0358503	1
	GO:0030154	cell differentiation		0	0.0144923	1
	GO:0048364	root development		0	0.0144923	1
	GO:0048437	floral organ development		0	0.01276	1
	GO:0048438	floral whorl development		0	0.00106576	1
	GO:0048440	carpel development		0	0.00121556	1
	GO:0048467	gynoecium development		0	0.000316445	1
	GO:0048507	meristem development		0	0.023367	1
	GO:0048513	organ development		0	3.87466e-05	1
	GO:0048569	post-embryonic organ development		0	0.01276	1
	GO:0048864	stem cell development		0	0.0358503	1
	GO:0006468	protein phosphorylation	0.0446175	-1		0
molecular	GO:0003677	DNA binding	0.00363419	1	0.00325724	1
	GO:0003700	sequence-specific DNA binding transcription factor activity	0.00363419	1	0.00312097	1
	GO:0004713	protein tyrosine kinase activity		0	0.00602374	0
	GO:0043565	sequence-specific DNA binding	0.0338062	-1		1
cellular	GO:0005634	nucleus	0.00129488	1	0.00366871	1

## Sheet: H3K4me3 down
			adj_pvalue
	Go-Term	Go-Description	L-t0	t_{L_t0}	L-I	t_{L_I}	t0-t2	t_{t0_t2}	t0-I	t_{t0_I}	t2-I	t_{t2_I}
biological	GO:0009725	response to hormone stimulus	1.49335E-3	1	4.33326E-4	1	4.42151E-4	1	3.76688E-3	1	6.06703E-5	1
	GO:0010033	response to organic substance	5.69516E-9	1	3.40659E-8	1	7.59529E-6	1	2.00819E-2	1	1.31745E-3	1
	GO:0006468	protein phosphorylation	1.28777E-6	1	2.99428E-7	1		0		0		0
	GO:0006725	cellular aromatic compound metabolic process	1.53029E-2	1		0		0		0		0
	GO:0006790	sulfur compound metabolic process	3.18879E-2	1		0		0		0		0
	GO:0006793	phosphorus metabolic process	1.45777E-3	1	4.1438E-4	1		0		0		0
	GO:0006796	phosphate-containing compound metabolic process	1.45777E-3	1	4.1438E-4	1		0		0		0
	GO:0006855	drug transmembrane transport	4.04531E-2	1		0	9.85157E-3	1		0		0
	GO:0006857	oligopeptide transport	2.33599E-2	1	4.92384E-3	1		0		0		0
	GO:0006915	apoptotic process	7.45706E-10	1	2.97202E-8	1		0		0		0
	GO:0006952	defense response	4.17985E-19	1	1.39676E-15	1		0		0		0
	GO:0006955	immune response	9.90742E-8	1	4.63969E-7	1		0		0		0
	GO:0006979	response to oxidative stress	1.96066E-3	1	1.21566E-2	1		0		0		0
	GO:0008037	cell recognition	4.73048E-3	1		0		0		0		0
	GO:0008219	cell death	9.61723E-11	1	8.44184E-9	1		0		0		0
	GO:0009266	response to temperature stimulus	7.59845E-4	1		0		0		0		0
	GO:0009314	response to radiation	1.87514E-4	1	1.02508E-2	1	1.20805E-2	1		0		0
	GO:0009409	response to cold	3.73141E-3	1		0		0		0		0
	GO:0009414	response to water deprivation	7.3552E-5	1	6.86795E-4	1		0		0		0
	GO:0009415	response to water	6.8846E-5	1	4.1438E-4	1		0		0		0
	GO:0009416	response to light stimulus	1.01163E-4	1	6.44785E-3	1	7.43728E-3	1		0		0
	GO:0009605	response to external stimulus	7.17974E-5	1	5.15596E-5	1	2.10297E-3	1		0		0
	GO:0009607	response to biotic stimulus	4.89386E-7	1	4.32309E-8	1		0		0		0
	GO:0009611	response to wounding	9.50756E-4	1	1.60166E-2	1	1.28498E-2	1		0		0
	GO:0009617	response to bacterium	3.07815E-5	1	5.15596E-5	1		0		0		0
	GO:0009620	response to fungus	2.05012E-3	1	2.2664E-3	1		0		0		0
	GO:0009626	plant-type hypersensitive response	3.03127E-2	1	3.38215E-2	1		0		0		0
	GO:0009628	response to abiotic stimulus	6.76941E-8	1	3.05458E-4	1		0		0		0
	GO:0009631	cold acclimation	1.76796E-2	1		0		0		0		0
	GO:0009637	response to blue light	1.20625E-3	1	4.85051E-2	1	3.38968E-2	1		0		0
	GO:0009638	phototropism	4.05904E-2	1		0		0		0		0
	GO:0009639	response to red or far red light	4.78178E-2	1	3.73307E-2	1		0		0		0
	GO:0009651	response to salt stress	1.46048E-2	1	3.73307E-2	1		0		0		0
	GO:0009737	response to abscisic acid stimulus	1.47639E-3	1		0		0		0		0
	GO:0009743	response to carbohydrate stimulus	1.64978E-4	1	6.63137E-3	1	6.98894E-3	1		0		0
	GO:0009751	response to salicylic acid stimulus	9.65354E-3	1		0		0		0		0
	GO:0009753	response to jasmonic acid stimulus	2.22592E-3	1		0		0		0		0
	GO:0009765	photosynthesis, light harvesting	1.04738E-3	1		0		0		0		0
	GO:0009767	photosynthetic electron transport chain	3.84376E-3	1		0		0		0		0
	GO:0009773	photosynthetic electron transport in photosystem I	1.53748E-2	1		0		0		0		0
	GO:0009814	defense response, incompatible interaction	3.19867E-2	1	4.39631E-2	1		0		0		0
	GO:0009875	pollen-pistil interaction	3.27682E-3	1	3.46107E-2	1		0		0		0
	GO:0010114	response to red light	9.19991E-4	1	4.48785E-3	1		0		0		0
	GO:0010200	response to chitin	1.64978E-4	1	5.32511E-4	1	2.10297E-3	1		0		0
	GO:0010218	response to far red light	1.75752E-3	1	1.95068E-2	1		0		0		0
	GO:0012501	programmed cell death	5.26721E-11	1	8.44184E-9	1		0		0		0
	GO:0015833	peptide transport	2.82377E-2	1	6.14132E-3	1		0		0		0
	GO:0016042	lipid catabolic process	3.41224E-2	1		0		0		0		0
	GO:0016310	phosphorylation	1.45042E-4	1	5.65887E-5	1		0		0		0
	GO:0019684	photosynthesis, light reaction	9.5654E-7	1		0		0		0		0
	GO:0019685	photosynthesis, dark reaction	3.43987E-2	1		0		0		0		0
	GO:0019748	secondary metabolic process	1.49335E-3	1	2.27247E-3	1		0		0		0
	GO:0019760	glucosinolate metabolic process	9.93142E-4	1	4.92384E-3	1		0		0		0
	GO:0034050	host programmed cell death induced by symbiont	3.18879E-2	1	3.56759E-2	1		0		0		0
	GO:0042742	defense response to bacterium	1.45042E-4	1	2.46458E-4	1		0		0		0
	GO:0045087	innate immune response	9.04973E-9	1	3.40659E-8	1		0		0		0
	GO:0048544	recognition of pollen	2.86531E-3	1	3.56759E-2	1		0		0		0
	GO:0050832	defense response to fungus	2.12095E-2	1	3.38215E-2	1		0		0		0
	GO:0051707	response to other organism	2.55117E-7	1	4.32309E-8	1		0		0		0
	GO:0055114	oxidation-reduction process	7.45706E-10	1	2.30566E-6	1		0		0		0
	GO:0015979	photosynthesis	1.56927E-8	1	7.98731E-3	1		0		0	4.73312E-2	-1
	GO:0006970	response to osmotic stress	3.11504E-3	1	2.35856E-2	1		0	4.81325E-2	-1		0
	GO:0006351	transcription, DNA-dependent		0		0	8.6497E-4	1	5.0053E-7	1	2.06963E-5	1
	GO:0006355	regulation of transcription, DNA-dependent		0		0	7.17283E-4	1	1.98488E-7	1	9.91214E-6	1
	GO:0007049	cell cycle		0		0		0	1.73912E-4	1	2.61335E-2	1
	GO:0007169	transmembrane receptor protein tyrosine kinase signaling pathway		0		0		0	2.51468E-2	1	5.80003E-3	1
	GO:0007389	pattern specification process		0		0		0	3.76688E-3	1	2.61973E-3	1
	GO:0009755	hormone-mediated signaling pathway		0		0	8.93094E-3	1	4.15798E-2	1	4.45225E-3	1
	GO:0009887	organ morphogenesis		0		0		0	3.37435E-3	1	5.80003E-3	1
	GO:0009908	flower development		0		0		0	7.76911E-4	1	6.06703E-5	1
	GO:0010073	meristem maintenance		0		0		0	1.14164E-2	1	1.73477E-2	1
	GO:0022621	shoot system development		0		0		0	8.00418E-3	1	1.96312E-2	1
	GO:0048367	shoot development		0		0		0	7.63231E-3	1	1.90996E-2	1
	GO:0048437	floral organ development		0		0		0	4.60837E-2	1	2.61973E-3	1
	GO:0048438	floral whorl development		0		0		0	1.79123E-2	1	3.35532E-3	1
	GO:0048507	meristem development		0		0		0	3.76688E-3	1	4.95888E-3	1
	GO:0048513	organ development		0		0		0	6.26044E-7	1	1.55117E-7	1
	GO:0048569	post-embryonic organ development		0		0		0	4.81325E-2	1	2.64881E-3	1
	GO:0051252	regulation of RNA metabolic process		0		0	8.6497E-4	1	1.98488E-7	1	1.02243E-5	1
	GO:0051301	cell division		0		0		0	8.90043E-3	1	4.17779E-2	1
	GO:0009943	adaxial/abaxial axis specification		0		0		0	4.60837E-2	1		0
	GO:0009944	polarity specification of adaxial/abaxial axis		0		0		0	4.60837E-2	1		0
	GO:0010074	maintenance of meristem identity		0		0		0	1.65243E-2	1		0
	GO:0010084	specification of organ axis polarity		0		0		0	2.5092E-2	1		0
	GO:0019827	stem cell maintenance		0		0		0	6.73343E-3	1		0
	GO:0030154	cell differentiation		0		0		0	4.85252E-3	1		0
	GO:0048864	stem cell development		0		0		0	4.07068E-3	1		0
	GO:0051726	regulation of cell cycle		0		0		0	4.85252E-3	1		0
	GO:0001708	cell fate specification		0		0		0		0	4.13143E-2	1
	GO:0007126	meiosis		0		0		0		0	4.87704E-2	1
	GO:0048364	root development		0		0		0		0	1.73477E-2	1
	GO:0048645	organ formation		0		0		0		0	6.87247E-3	1
	GO:0000160	two-component signal transduction system (phosphorelay)		0	1.21566E-2	1	7.17283E-4	1		0		0
	GO:0005985	sucrose metabolic process		0	2.35377E-2	1		0		0		0
	GO:0006261	DNA-dependent DNA replication		0	2.35377E-2	-1		0		0		0
	GO:0006605	protein targeting		0	1.26614E-2	-1		0		0		0
	GO:0006839	mitochondrial transport		0	3.46107E-2	-1		0		0		0
	GO:0006913	nucleocytoplasmic transport		0	2.12297E-2	-1		0		0		0
	GO:0007018	microtubule-based movement		0	4.88028E-2	-1		0		0		0
	GO:0007047	cellular cell wall organization		0		0	9.46936E-3	1		0		0
	GO:0009311	oligosaccharide metabolic process		0	9.85184E-3	1		0		0		0
	GO:0009312	oligosaccharide biosynthetic process		0	2.16689E-2	1		0		0		0
	GO:0009636	response to toxin		0	1.26614E-2	1		0		0		0
	GO:0009723	response to ethylene stimulus		0	3.57938E-2	1	9.2695E-3	1		0		0
	GO:0009873	ethylene mediated signaling pathway		0	4.2833E-2	1	2.42917E-3	1		0		0
	GO:0009970	cellular response to sulfate starvation		0	4.8231E-2	1		0		0		0
	GO:0017038	protein import		0	3.78233E-2	-1		0		0		0
	GO:0019941	modification-dependent protein catabolic process		0		0	3.38968E-2	-1		0		0
	GO:0042493	response to drug		0		0	1.28498E-2	1		0		0
	GO:0051603	proteolysis involved in cellular protein catabolic process		0		0	3.38968E-2	-1		0		0
	GO:0052542	defense response by callose deposition		0	2.16689E-2	1		0		0		0
	GO:0052544	defense response by callose deposition in cell wall		0	3.56759E-2	1		0		0		0
	GO:0010038	response to metal ion		0		0		0	4.60837E-2	-1		0
	GO:0016192	vesicle-mediated transport		0		0		0	7.05808E-3	-1		0
	GO:0022900	electron transport chain		0		0		0	4.15798E-2	-1		0
	GO:0046686	response to cadmium ion		0		0		0	4.43663E-2	-1		0
	GO:0009653	anatomical structure morphogenesis	1.80207E-2	-1		0		0	3.14967E-5	1	3.09006E-4	1
	GO:0006259	DNA metabolic process	6.23306E-4	-1	4.36431E-3	-1		0	1.23906E-3	1		0
	GO:0009791	post-embryonic development	1.3439E-2	-1	5.13328E-3	-1		0		0	2.61335E-2	1
	GO:0006260	DNA replication	3.43987E-2	-1		0		0		0		0
	GO:0006281	DNA repair	9.86124E-3	-1		0		0		0		0
	GO:0006325	chromatin organization	3.3582E-3	-1	1.17868E-3	-1		0		0		0
	GO:0006396	RNA processing	4.48446E-6	-1	3.05458E-4	-1		0		0		0
	GO:0006397	mRNA processing	9.86124E-3	-1	4.06733E-2	-1		0		0		0
	GO:0006730	one-carbon metabolic process	4.27015E-2	-1		0		0		0		0
	GO:0006974	response to DNA damage stimulus	1.14896E-2	-1		0		0		0		0
	GO:0007010	cytoskeleton organization	1.07638E-2	-1	1.82565E-2	-1		0		0		0
	GO:0009790	embryo development	1.07638E-2	-1	4.92384E-3	-1		0		0		0
	GO:0009793	embryo development ending in seed dormancy	3.14826E-2	-1	1.84712E-2	-1		0		0		0
	GO:0010154	fruit development	3.94635E-2	-1	2.44064E-2	-1		0		0		0
	GO:0016071	mRNA metabolic process	1.53029E-2	-1		0		0		0		0
	GO:0016568	chromatin modification	1.52608E-3	-1	2.92125E-3	-1		0		0		0
	GO:0032259	methylation	3.49569E-2	-1	4.01261E-2	-1		0		0		0
	GO:0042254	ribosome biogenesis	8.47622E-3	-1	6.09219E-3	-1		0		0		0
	GO:0043087	regulation of GTPase activity	4.04531E-2	-1		0		0		0		0
	GO:0048316	seed development	3.87182E-2	-1	2.02243E-2	-1		0		0		0
	GO:0051276	chromosome organization	2.44777E-2	-1	2.86543E-3	-1		0		0		0
	GO:0006412	translation	5.61353E-8	-1	3.88887E-8	-1		0		0	1.36313E-2	-1
	GO:0006457	protein folding	4.4368E-3	-1	9.85184E-3	-1		0	4.60837E-2	-1		0
	GO:0006886	intracellular protein transport	6.45548E-4	-1	2.06897E-3	-1		0	8.32552E-3	-1	1.26928E-2	-1
	GO:0008104	protein localization	1.0087E-4	-1	7.71832E-3	-1		0	4.85252E-3	-1	4.95888E-3	-1
	GO:0015031	protein transport	8.99813E-5	-1	9.25988E-3	-1		0	3.76688E-3	-1	4.95888E-3	-1
	GO:0034613	cellular protein localization	1.52608E-3	-1	3.09725E-3	-1		0	1.29402E-2	-1	1.41537E-2	-1
	GO:0046907	intracellular transport	3.32348E-5	-1	1.17868E-3	-1		0	3.37435E-3	-1	6.87247E-3	-1
	GO:0051641	cellular localization	4.76959E-3	-1		0		0	4.85252E-3	-1	5.748E-3	-1
molecular	GO:0003700	sequence-specific DNA binding transcription factor activity	3.84073E-6	1	2.19722E-7	1	6.13385E-10	1	2.67416E-14	1	2.97496E-15	1
	GO:0004497	monooxygenase activity	8.99657E-11	1	7.92311E-9	1		0		0		0
	GO:0004672	protein kinase activity	1.70103E-6	1	1.09656E-7	1		0		0		0
	GO:0004674	protein serine/threonine kinase activity	3.84073E-6	1	2.04123E-7	1		0		0		0
	GO:0004713	protein tyrosine kinase activity	3.87099E-6	1	1.33359E-7	1		0		0		0
	GO:0004871	signal transducer activity	5.32952E-7	1	2.60194E-9	1		0		0		0
	GO:0004872	receptor activity	1.35794E-6	1	3.28861E-8	1		0		0		0
	GO:0004888	transmembrane signaling receptor activity	1.70103E-6	1	7.17497E-8	1		0		0		0
	GO:0005506	iron ion binding	1.00038E-7	1	1.68562E-6	1		0		0		0
	GO:0005509	calcium ion binding	1.39259E-3	1	5.47619E-3	1		0		0		0
	GO:0005529	carbohydrate binding	3.2523E-3	1		0		0		0		0
	GO:0008194	UDP-glycosyltransferase activity	3.2523E-3	1	9.22605E-4	1		0		0		0
	GO:0016168	chlorophyll binding	1.34718E-2	1		0		0		0		0
	GO:0016491	oxidoreductase activity	1.25038E-7	1	1.28045E-5	1		0		0		0
	GO:0016701	oxidoreductase activity, acting on single donors with incorporation of molecular oxygen	4.71553E-2	1		0		0		0		0
	GO:0016773	phosphotransferase activity, alcohol group as acceptor	2.82157E-5	1	5.80904E-7	1		0		0		0
	GO:0019825	oxygen binding	3.25684E-9	1	7.14353E-8	1		0		0		0
	GO:0020037	heme binding	7.64529E-9	1	4.74613E-8	1		0		0		0
	GO:0030246	carbohydrate binding	2.55845E-3	1		0		0		0		0
	GO:0035251	UDP-glucosyltransferase activity	1.93823E-2	1	8.50537E-4	1		0		0		0
	GO:0046906	tetrapyrrole binding	4.54056E-11	1	2.60306E-8	1		0		0		0
	GO:0043565	sequence-specific DNA binding		0	1.6778E-2	1		0	4.51649E-5	1	1.67831E-5	1
	GO:0003924	GTPase activity		0	1.48156E-2	-1		0		0		0
	GO:0004518	nuclease activity		0	1.76758E-2	-1		0		0		0
	GO:0004553	hydrolase activity, hydrolyzing O-glycosyl compounds		0		0	6.97635E-5	1		0		0
	GO:0008168	methyltransferase activity		0	1.4109E-2	-1		0		0		0
	GO:0016762	xyloglucan:xyloglucosyl transferase activity		0		0	4.59147E-3	1		0		0
	GO:0016798	hydrolase activity, acting on glycosyl bonds		0		0	1.60965E-4	1		0		0
	GO:0046527	glucosyltransferase activity		0	4.44581E-3	1		0		0		0
	GO:0003723	RNA binding	4.87197E-8	-1	4.00239E-10	-1		0		0		0
	GO:0003735	structural constituent of ribosome	5.57881E-10	-1	1.50905E-9	-1		0		0		0
	GO:0004221	ubiquitin thiolesterase activity	4.98627E-3	-1	1.30106E-2	-1		0		0		0
	GO:0004386	helicase activity	7.43601E-3	-1	3.7051E-3	-1		0		0		0
	GO:0004527	exonuclease activity	1.93823E-2	-1		0		0		0		0
cellular	GO:0009521	photosystem	1.62678E-5	1	4.29836E-2	1		0		0		0
	GO:0009522	photosystem I	1.8977E-4	1	3.79329E-2	1		0		0		0
	GO:0009523	photosystem II	7.92654E-3	1		0		0		0		0
	GO:0030076	light-harvesting complex	7.92654E-3	1		0		0		0		0
	GO:0048046	apoplast	1.28147E-5	1	9.15523E-4	1	2.97242E-4	1		0		0
	GO:0009579	thylakoid	1.26413E-6	1		0		0	7.8819E-8	-1	7.73913E-6	-1
	GO:0042651	thylakoid membrane	1.26413E-6	1		0		0	2.55268E-7	-1	4.26486E-6	-1
	GO:0005618	cell wall		0		0	3.22258E-5	1		0		0
	GO:0009505	plant-type cell wall		0		0	2.97242E-4	1		0		0
	GO:0005773	vacuole		0		0		0	1.68631E-6	-1	1.61975E-2	-1
	GO:0000151	ubiquitin ligase complex	4.03069E-2	-1		0		0		0		0
	GO:0005694	chromosome	3.3467E-2	-1	1.87407E-2	-1		0		0		0
	GO:0005794	Golgi apparatus	2.22561E-2	-1		0		0		0		0
	GO:0005829	cytosol	1.28147E-5	-1	1.66452E-5	-1	3.46436E-2	-1		0		0
	GO:0005856	cytoskeleton	1.68214E-2	-1	2.78618E-2	-1		0		0		0
	GO:0015630	microtubule cytoskeleton	2.66225E-3	-1	1.87407E-2	-1		0		0		0
	GO:0022626	cytosolic ribosome	7.54848E-4	-1	5.0238E-5	-1		0		0		0
	GO:0031461	cullin-RING ubiquitin ligase complex	4.79899E-3	-1		0		0		0		0
	GO:0042175	nuclear outer membrane-endoplasmic reticulum membrane network	1.6278E-2	-1		0		0		0		0
	GO:0080008	CUL4 RING ubiquitin ligase complex	2.58221E-2	-1		0		0		0		0
	GO:0005840	ribosome	1.28147E-5	-1	1.32805E-5	-1		0		0	3.29109E-2	-1
	GO:0030529	ribonucleoprotein complex	1.26413E-6	-1	8.64781E-6	-1		0		0	2.10415E-2	-1
	GO:0044445	cytosolic part	1.26413E-6	-1	4.4628E-9	-1		0		0	3.13264E-2	-1
	GO:0000502	proteasome complex	4.12507E-2	-1		0		0	4.78336E-2	-1		0
	GO:0019866	organelle inner membrane	2.34533E-2	-1	1.3503E-4	-1		0	7.88872E-3	-1	8.65633E-3	-1

## Sheet: H3K27me3 up
			adj_pvalue
	Go-Term	Go-Description	L-t0	t_{L_t0}	L-I	t_{L_I}	t0_t2	t_{t0_t2}	t0_I	t_{t0_I}	t2-I
biological	GO:0006464	cellular protein modification process		0	0.0270073	1		0		0
	GO:0006468	protein phosphorylation		0	0.0327122	1		0		0
	GO:0006915	apoptotic process		0	0.0270073	1		0		0
	GO:0012501	programmed cell death		0	0.0408717	1		0		0
	GO:0043687	post-translational protein modification		0	0.0270073	1		0		0
	GO:0009908	flower development		0		0		0		0	0.00228737
	GO:0007275	multicellular organismal development		0	0.0389811	-1		0		0
molecular	GO:0000166	nucleotide binding	0.0349527	1	0.000109501	1		0		0
	GO:0001882	nucleoside binding	0.0303122	1	0.000349533	1		0		0
	GO:0004672	protein kinase activity	0.0388281	1	0.003978	1		0		0
	GO:0004674	protein serine/threonine kinase activity		0	0.00264186	1		0		0
	GO:0004713	protein tyrosine kinase activity		0	0.00630995	1		0		0
	GO:0004872	receptor activity		0	0.00713929	1		0		0
	GO:0005524	ATP binding	0.0303122	1	0.000349533	1		0		0
	GO:0008194	UDP-glycosyltransferase activity		0	0.0204144	1		0		0
	GO:0016301	kinase activity	0.0349527	1	0.00167724	1		0		0
	GO:0016740	transferase activity		0	0.000645064	1		0		0
	GO:0016772	transferase activity, transferring phosphorus-containing groups	0.0303122	1	0.00183089	1		0		0
	GO:0016773	phosphotransferase activity, alcohol group as acceptor	0.0388281	1	0.00157788	1		0		0
	GO:0017076	purine nucleotide binding	0.0388281	1	0.000202806	1		0		0
cellular	GO:0005886	plasma membrane		0	0.0158019	1		0		0

## Sheet: H3K4me3 up and H3K27me3 down
			adj_pvalue
			L-t0	t_{L_t0}	L_t0	t_{L_t0}	L-I	t_{L_I}	L_I	t_{L_I}	t0_t2	t_{t0_t2}	t0_t2	t_{t0_t2}	t0-I	t_{t0_I}	t0_I	t_{t0_I}	t2-I	t_{t2_I}	t2_I	t_{t2_I}
	Go-Term	Go-Description	vs K27 down	t_{L_t0}	vs K4 up	t_{L_t0}	vs K27 down	t_{L_I}	vs K4 up	t_{L_I}	t0_t2	t_{t0_t2}	t0_t2	t_{t0_t2}	vs K27 down	t_{t0_I}	vs K4 up	t_{t0_I}	vs K27 down	t_{t2_I}	vs K4 up	t_{t2_I}
biological	GO:0000160	two-component signal transduction system (phosphorelay)		0	0.0156241	1		0	0.0422204	1		0		0		0		0		0		0
	GO:0006139	nucleobase-containing compound metabolic process	6.49436e-06	1	7.06159e-05	1	0.0321061	1	0.000579317	1		0		0		0		0		0		0
	GO:0006350	transcription, DNA-dependent	2.0012e-05	1	1.79019e-12	1		0	5.93371e-08	1		0		0		0	0.0100149	1		0		0
	GO:0006351	transcription, DNA-dependent	0.00703753	1	7.53648e-08	1		0	0.000189619	1		0		0		0		0		0		0
	GO:0006355	regulation of transcription, DNA-dependent	0.00703753	1	2.90682e-08	1		0	0.000189619	1		0		0		0		0		0		0
	GO:0006807	nitrogen compound metabolic process	6.49436e-06	1	0.000434528	1	0.0392791	1	0.00279306	1		0		0		0		0		0		0
	GO:0007275	multicellular organismal development	2.57974e-05	1	9.59193e-05	1		0	0.0274545	1		0		0		0		0		0		0
	GO:0009059	macromolecule biosynthetic process	8.84847e-05	1	0.00553075	1		0	0.0156508	1		0		0		0		0		0		0
	GO:0009723	response to ethylene stimulus		0	0.00510186	1	0.0429791	1	0.003914	1		0		0		0		0		0		0
	GO:0009725	response to hormone stimulus	0.0283839	1	8.56889e-05	1		0	0.0127402	1		0		0		0		0		0		0
	GO:0009791	post-embryonic development	0.000155923	1	0.00531992	1		0	0.0422204	1		0		0		0		0		0		0
	GO:0009873	ethylene mediated signaling pathway		0	0.00669709	1		0	0.0223478	1		0		0		0		0		0		0
	GO:0009908	flower development	0.00703753	1	0.000502643	1		0	0.0124722	1		0		0		0		0		0		0
	GO:0010033	response to organic substance	0.0103126	1	1.10225e-05	1		0	0.003914	1		0		0		0		0		0		0
	GO:0010468	regulation of gene expression	2.89095e-05	1	5.48067e-12	1		0	1.64183e-07	1		0		0		0	0.0175706	1		0		0
	GO:0016070	RNA metabolic process	0.0113828	1	0.00139705	1		0	0.0156508	1		0		0		0		0		0		0
	GO:0042221	response to chemical stimulus		0	0.000612123	1		0	0.0185516	1		0		0		0		0		0		0
	GO:0045449	regulation of transcription, DNA-dependent	2.0012e-05	1	9.16387e-14	1		0	5.93371e-08	1		0		0		0	0.0100149	1		0		0
	GO:0048513	organ development	3.92575e-05	1	3.80325e-05	1	0.0321061	1	0.00799593	1		0		0		0		0		0		0
	GO:0051171	regulation of nitrogen compound metabolic process	6.75023e-06	1	9.16387e-14	1		0	5.93371e-08	1		0		0		0	0.0175706	1		0		0
	GO:0051252	regulation of RNA metabolic process	0.00703753	1	2.90682e-08	1		0	0.000189619	1		0		0		0		0		0		0
	GO:0007389	pattern specification process	0.0194551	1	0.000905049	1		0		0		0		0		0		0		0		0
	GO:0009653	anatomical structure morphogenesis	0.0045967	1	0.0144273	1		0		0		0		0		0		0		0		0
	GO:0009753	response to jasmonic acid stimulus		0	0.0338633	1		0		0		0		0		0		0		0		0
	GO:0009755	hormone-mediated signaling pathway		0	0.00433587	1		0		0		0		0		0		0		0		0
	GO:0009887	organ morphogenesis	0.00202601	1	0.000273874	1		0		0		0		0		0		0		0		0
	GO:0010073	meristem maintenance		0	0.0280636	1		0		0		0		0		0		0		0		0
	GO:0019748	secondary metabolic process		0	0.00356061	1		0		0		0		0		0		0		0		0
	GO:0048507	meristem development	0.0106533	1	0.0122147	1		0		0		0		0		0		0		0		0
	GO:0055114	oxidation-reduction process		0	0.00248095	1		0		0		0		0		0		0		0		0
	GO:0009058	biosynthetic process	6.12098e-08	1		0	0.0392791	1	0.00597221	1		0		0		0		0		0		0
	GO:0044249	cellular biosynthetic process	6.12098e-08	1		0	0.0321061	1	0.0045603	1		0		0		0		0		0		0
	GO:0048438	floral whorl development		0		0		0	0.0214162	1		0		0		0		0		0		0
	GO:0048467	gynoecium development		0		0		0	0.0400055	1		0		0		0		0		0		0
	GO:0006950	response to stress		0		0		0		0		0		0	0.0118053	1		0	0.00170662	1		0
	GO:0006952	defense response		0		0		0		0		0		0		0		0	0.00615405	1		0
	GO:0006955	immune response		0		0		0		0		0		0		0		0	0.0228689	1		0
	GO:0007154	cell communication		0		0		0		0		0		0		0		0	0.00859153	1		0
	GO:0007165	signal transduction		0		0		0		0		0		0		0		0	0.00859153	1		0
	GO:0009628	response to abiotic stimulus		0		0		0		0		0		0		0		0	0.0151295	1		0
	GO:0012501	programmed cell death		0		0		0		0		0		0		0		0	0.0228689	1		0
	GO:0045087	innate immune response		0		0		0		0		0		0		0		0	0.0151295	1		0
	GO:0048366	leaf development		0		0		0		0		0		0		0		0	0.0211993	1		0
	GO:0048827	phyllome development		0		0		0		0		0		0		0		0	0.0415653	1		0
	GO:0010016	shoot morphogenesis	0.0463609	1		0		0		0		0		0		0		0		0		0
	GO:0044237	cellular metabolic process	3.12687e-07	1		0	0.0321061	1		0		0		0		0		0		0		0
	GO:0044238	primary metabolic process	4.96329e-06	1		0	0.0392791	1		0		0		0		0		0		0		0
	GO:0006793	phosphorus metabolic process		0		0		0	0.00229669	-1		0		0		0		0		0		0
	GO:0006796	phosphate-containing compound metabolic process		0		0		0	0.00229669	-1		0		0		0		0		0		0
	GO:0043687	post-translational protein modification		0		0		0	2.87132e-05	-1		0		0		0		0		0		0
	GO:0006281	DNA repair		0	0.00669709	-1		0		0		0		0		0		0		0		0
	GO:0006412	translation		0	0.00550432	-1		0		0		0		0		0		0		0		0
	GO:0006974	response to DNA damage stimulus		0	0.00531992	-1		0		0		0		0		0		0		0		0
	GO:0006259	DNA metabolic process		0	0.00564883	-1		0	0.0422204	-1		0		0		0		0		0		0
	GO:0006464	cellular protein modification process		0	0.0141466	-1		0	6.39943e-06	-1		0		0		0		0		0		0
	GO:0006468	protein phosphorylation		0	0.0303015	-1		0	0.000194902	-1		0		0		0		0		0		0
	GO:0016310	phosphorylation		0	0.0451512	-1		0	0.003914	-1		0		0		0		0		0		0
	GO:0019538	protein metabolic process		0	3.83731e-05	-1		0	3.77319e-05	-1		0		0		0		0		0		0
	GO:0044267	cellular protein metabolic process		0	5.1897e-06	-1		0	3.50538e-06	-1		0		0		0		0		0		0
molecular	GO:0003676	nucleic acid binding	4.00275e-06	1	0.000461844	1		0	0.00896308	1		0		0		0		0		0		0
	GO:0003677	DNA binding	1.82273e-05	1	1.35852e-07	1		0	7.52478e-05	1		0		0		0	0.0314856	1		0		0
	GO:0003700	sequence-specific DNA binding transcription factor activity	2.00587e-05	1	7.82459e-18	1		0	4.4417e-08	1		0		0		0	0.00284688	1		0	0.030423	0
	GO:0005199	structural constituent of cell wall		0	0.0225598	1		0	0.0366029	1		0		0		0		0		0		0
	GO:0016701	oxidoreductase activity, acting on single donors with incorporation of molecular oxygen		0	0.0224003	1		0	0.0438014	1		0		0		0		0		0		1
	GO:0016702	oxidoreductase activity, acting on single donors with incorporation of molecular oxygen, incorporation of two atoms of oxygen		0	0.0224003	1		0	0.0438014	1		0		0		0		0		0		0
	GO:0043565	sequence-specific DNA binding	0.0176575	1	1.35852e-07	1		0	1.88043e-05	1		0		0		0		0		0		0
	GO:0046914	transition metal ion binding		0	8.26714e-05	1		0	0.0126967	1		0		0		0		0		0		0
	GO:0051213	dioxygenase activity		0	0.0347877	1		0	0.0438014	1		0		0		0		0		0		0
	GO:0004497	monooxygenase activity		0	0.0428146	1		0		0		0		0		0		0		0		0
	GO:0005506	iron ion binding		0	0.00242905	1		0		0		0		0		0		0		0		0
	GO:0008270	zinc ion binding		0	0.0191082	1		0		0		0		0		0		0		0		0
	GO:0016491	oxidoreductase activity		0	0.00926496	1		0		0		0		0		0		0		0		0
	GO:0019825	oxygen binding		0	0.020532	1		0		0		0		0		0		0		0		0
	GO:0043169	cation binding		0	0.00359254	1		0		0		0		0		0		0		0		0
	GO:0046872	metal ion binding		0	0.00160679	1		0		0		0		0		0		0		0		0
	GO:0046906	tetrapyrrole binding		0	0.0461095	1		0		0		0		0		0		0		0		0
	GO:0004091	carboxylesterase activity		0		0		0	0.0366029	1		0		0		0		0		0		0
	GO:0015144	carbohydrate transmembrane transporter activity		0		0		0	0.0438014	1		0		0		0		0		0		0
	GO:0051119	sugar transmembrane transporter activity		0		0		0	0.0438014	1		0		0		0		0		0		0
	GO:0003735	structural constituent of ribosome		0	0.0190398	-1		0		0		0		0		0		0		0		0
	GO:0004386	helicase activity		0	0.0347877	-1		0		0		0		0		0		0		0		0
	GO:0008168	methyltransferase activity		0	0.0205016	-1		0		0		0		0		0		0		0		0
	GO:0016462	pyrophosphatase activity		0	0.0347877	-1		0		0		0		0		0		0		0		0
	GO:0016818	hydrolase activity, acting on acid anhydrides, in phosphorus-containing anhydrides		0	0.0393996	-1		0		0		0		0		0		0		0		0
	GO:0017111	nucleoside-triphosphatase activity		0	0.032379	-1		0		0		0		0		0		0		0		0
	GO:0000166	nucleotide binding		0	0.00104011	-1		0	1.88043e-05	-1		0		0		0		0		0		0
	GO:0001882	nucleoside binding		0	0.00954679	-1		0	0.000231341	-1		0		0		0		0		0		0
	GO:0004672	protein kinase activity		0	0.00926496	-1		0	5.08319e-05	-1		0		0		0		0		0		0
	GO:0004674	protein serine/threonine kinase activity		0	0.00791635	-1		0	6.99464e-05	-1		0		0		0		0		0		0
	GO:0004713	protein tyrosine kinase activity		0	0.0215267	-1		0	0.000231341	-1		0		0		0		0		0		0
	GO:0005524	ATP binding		0	0.00213351	-1		0	8.38342e-06	-1		0		0		0		0		0		0
	GO:0016301	kinase activity		0	0.0190398	-1		0	1.88043e-05	-1		0		0		0		0		0		0
	GO:0016740	transferase activity		0	0.0134666	-1		0	0.000161537	-1		0		0		0		0		0		0
	GO:0016772	transferase activity, transferring phosphorus-containing groups		0	0.00250681	-1		0	1.52045e-06	-1		0		0		0		0		0		0
	GO:0016773	phosphotransferase activity, alcohol group as acceptor		0	0.0059936	-1		0	8.38342e-06	-1		0		0		0		0		0		0
	GO:0017076	purine nucleotide binding		0	0.00319265	-1		0	0.000127793	-1		0		0		0		0		0		0
cellular	GO:0005634	nucleus	6.86475e-06	1	0.0351902	1	0.0151592	1		0		0		0	0.0337354	1	0.0394949	1		0		0
	GO:0031225	anchored to membrane		0	0.0440882	1		0		0		0		0		0		0		0		0
	GO:0005622	intracellular	3.66458e-07	1		0	0.000614921	1		0		0		0	0.00121559	1		0	0.000128035	1		0
	GO:0005773	vacuole		0		0		0		0		0		0	0.0389094	1		0	0.00864048	1		0
	GO:0005886	plasma membrane		0		0		0		0		0		0	0.00800151	1		0	0.00864048	1		0
	GO:0009579	thylakoid		0		0		0		0		0		0	0.011071	1		0	0.000278281	1		0
	GO:0016020	membrane		0		0		0		0		0		0	6.21567e-06	1		0	6.55451e-06	1		0
	GO:0031224	intrinsic to membrane		0		0		0		0		0		0	0.00800151	1		0	0.000980966	1		0
	GO:0042651	thylakoid membrane		0		0		0		0		0		0		0		0	0.00352363	1		0
	GO:0043231	intracellular membrane-bounded organelle	4.04595e-06	1		0	0.00719887	1		0		0		0	0.000209116	1		0	9.07634e-05	1		0
	GO:0012505	endomembrane system	1.16001e-06	-1		0	0.0167749	-1		0		0		0		0		0		0		0
	GO:0048046	apoplast		0		0		0		0		0		0	0.041872	1		0		0		0
	GO:0005737	cytoplasm	0.0483439	1		0		0	0.0449133	-1		0		0	0.00959686	1	0.0394949	-1	0.000888834	1		0
	GO:0009507	chloroplast		0	0.00614395	-1		0		0		0		0	0.011071	1	0.0394949	-1	9.07634e-05	1		0
	GO:0009536	plastid		0	0.00398669	-1		0		0		0		0	0.011071	1	0.0394949	-1	9.07634e-05	1		0
	GO:0005739	mitochondrion		0	0.000222077	-1		0		0		0		0		0		0		0		0
	GO:0005829	cytosol		0	0.0103406	-1		0		0		0		0		0		0		0		0
	GO:0005840	ribosome		0	0.0103406	-1		0		0		0		0		0		0		0		0
	GO:0022626	cytosolic ribosome		0	0.0258791	-1		0		0		0		0		0		0		0		0
	GO:0030529	ribonucleoprotein complex		0	0.0157125	-1		0		0		0		0		0		0		0		0
	GO:0044445	cytosolic part		0	0.0103406	-1		0		0		0		0		0		0		0		0
	GO:0005694	chromosome		0	0.0163183	-1		0	0.0449133	-1		0		0		0		0		0		0
	GO:0043234	protein complex		0	0.000222077	-1		0	0.0449133	-1		0		0		0		0		0		0

## Sheet: H3K4me3 down and H3k27me3 up
			adj_pvalue
			L-t0	t_{L_t0}	L_t0	t_{L_t0}	L-I	t_{L_I}	L_I	t_{L_I}	t0_t2	t_{t0_t2}	t0_t2	t_{t0_t2}	t0-I	t_{t0_I}	t0_I	t_{t0_I}	t2-I	t_{t2_I}	t2_I
	Go-Term	Go-Description	vs K27 up	t_{L_t0}	vs K4down	t_{L_t0}	vs K27 up	t_{L_I}	vs K4down	t_{L_I}	K27	t_{t0_t2}	K4	t_{t0_t2}	vs K27 up	t_{t0_I}	vs K4down	t_{t0_I}	vs K27 up	t_{t2_I}	vs K4down	t_{t2_I}
biological	GO:0006350	transcription, DNA-dependent		0		0	0.0241753	1		0		0		0	6.02049e-06	1	0.000106195	1	2.72365e-06	1	0.000160751	1
	GO:0006351	transcription, DNA-dependent		0		0	0.0491733	1		0		0		0	0.000501692	1	0.000599918	1	0.000150126	1	0.000328659	1
	GO:0006355	regulation of transcription, DNA-dependent		0		0	0.046947	1		0		0		0	0.000501692	1	0.000328873	1	0.000150126	1	0.000290571	1
	GO:0009058	biosynthetic process		0		0	0.0365383	1		0		0		0	2.74044e-05	1	0.0217117	1	2.73794e-06	1	0.0240664	1
	GO:0009723	response to ethylene stimulus		0		0	0.0347957	1		0		0		0	0.0306288	1	0.0198973	1		0	0.0438759	1
	GO:0009725	response to hormone stimulus		0		0	0.00164342	1		0		0		0	0.000463309	1	0.00196333	1	0.000134688	1	0.00502323	1
	GO:0009755	hormone-mediated signaling pathway		0		0	0.0241753	1		0		0		0	0.0189834	1	0.0110183	1	0.0104337	1	0.0280834	1
	GO:0010033	response to organic substance	0.00127468	1		0	7.32405e-05	1		0		0		0	0.000981144	1	0.00576369	1	0.000134688	1	0.00476913	1
	GO:0010468	regulation of gene expression		0		0	0.0241753	1		0		0		0	1.14071e-05	1	0.000328873	1	5.22057e-06	1	0.000290571	1
	GO:0042221	response to chemical stimulus	0.00138527	1		0	7.32405e-05	1		0		0		0	0.00364547	1	0.00550332	1	0.000741897	1	0.0235246	1
	GO:0044249	cellular biosynthetic process		0		0	0.0365383	1		0		0		0	2.74044e-05	1	0.0157071	1	2.72365e-06	1	0.0174893	1
	GO:0045449	regulation of transcription, DNA-dependent		0		0	0.0213602	1		0		0		0	6.02049e-06	1	6.29829e-05	1	2.72365e-06	1	9.74066e-05	1
	GO:0051171	regulation of nitrogen compound metabolic process		0		0	0.0213602	1		0		0		0	6.02049e-06	1	0.000106195	1	2.20465e-06	1	5.93842e-05	1
	GO:0051252	regulation of RNA metabolic process		0		0	0.046947	1		0		0		0	0.000501692	1	0.000542773	1	0.000150126	1	0.000290571	1
	GO:0000160	two-component signal transduction system (phosphorelay)		0		0	0.0365383	1		0		0		0		0		0		0		0
	GO:0006915	apoptotic process	0.0179035	1		0	0.0370568	1		0		0		0		0		0		0		0
	GO:0006950	response to stress	7.99829e-07	1		0	7.32405e-05	1		0		0		0		0		0		0		0
	GO:0006952	defense response	8.04437e-05	1		0	0.00164342	1		0		0		0		0		0		0		0
	GO:0006955	immune response	0.000800359	1		0	0.0111329	1		0		0		0		0		0		0		0
	GO:0007154	cell communication	0.000241285	1		0	0.00278295	1		0		0		0		0		0		0		0
	GO:0007165	signal transduction	0.000241285	1		0	0.0105089	1		0		0		0		0		0		0		0
	GO:0008219	cell death	0.00138527	1		0	0.0261073	1		0		0		0		0		0		0		0
	GO:0009605	response to external stimulus		0		0	0.0365383	1		0		0		0		0		0		0		0
	GO:0009607	response to biotic stimulus	0.00840939	1		0	0.0491733	1		0		0		0		0		0		0		0
	GO:0009628	response to abiotic stimulus	0.000241285	1		0	0.0213602	1		0		0		0	0.0108555	1		0	0.0115649	1		0
	GO:0009873	ethylene mediated signaling pathway		0		0	0.046947	1		0		0		0		0		0		0		0
	GO:0012501	programmed cell death	0.00284895	1		0	0.0241753	1		0		0		0		0		0		0		0
	GO:0045087	innate immune response	0.000481958	1		0	0.0152285	1		0		0		0		0		0		0		0
	GO:0051707	response to other organism	0.00284895	1		0	0.046947	1		0		0		0		0		0		0		0
	GO:0006139	nucleobase-containing compound metabolic process		0		0		0		0		0		0	4.45134e-05	1		0	1.22867e-05	1	0.0153125	1
	GO:0007275	multicellular organismal development		0		0		0		0		0		0	3.17223e-08	1	1.74798e-06	1	2.18138e-06	1	2.7417e-05	1
	GO:0007389	pattern specification process		0		0		0		0		0		0	0.00768839	1	0.00268696	1	0.00340972	1	0.000746946	1
	GO:0009059	macromolecule biosynthetic process		0		0		0		0		0		0	0.000198138	1		0	3.24358e-05	1	0.0135291	1
	GO:0009653	anatomical structure morphogenesis		0		0		0		0		0		0	0.00243349	1	0.0305446	1	0.00340972	1	0.0280834	1
	GO:0009740	gibberellic acid mediated signaling pathway		0		0		0		0		0		0		0		0		0	0.0377264	1
	GO:0009791	post-embryonic development		0		0		0		0		0		0	6.02049e-06	1	9.26271e-06	1	1.30368e-05	1	6.36365e-05	1
	GO:0009887	organ morphogenesis		0		0		0		0		0		0	0.000981144	1	0.000713103	1	0.00104244	1	0.000328659	1
	GO:0009908	flower development		0		0		0		0		0		0	0.000134048	1	2.15463e-05	1	8.73134e-05	1	2.04791e-05	1
	GO:0010051	xylem and phloem pattern formation		0		0		0		0		0		0		0		0	0.0363033	1	0.0174893	1
	GO:0010073	meristem maintenance		0		0		0		0		0		0	0.0189834	1	0.0115337	1	0.0308674	1	0.0277873	1
	GO:0010074	maintenance of meristem identity		0		0		0		0		0		0		0		0		0	0.0285905	1
	GO:0010223	secondary shoot formation		0		0		0		0		0		0		0		0		0	0.049581	1
	GO:0010476	gibberellin mediated signaling pathway		0		0		0		0		0		0		0		0		0	0.0377264	1
	GO:0016070	RNA metabolic process		0		0		0		0		0		0	0.000817914	1	0.010987	1	0.000777673	1	0.00460498	1
	GO:0019827	stem cell maintenance		0		0		0		0		0		0	0.0214513	1	0.0112993	1		0	0.0136786	1
	GO:0030154	cell differentiation		0		0		0		0		0		0	0.000981144	1	0.010987	1	0.00481693	1	0.0135291	1
	GO:0048364	root development		0		0		0		0		0		0	0.0298733	1		0	0.0235124	1	0.0377264	1
	GO:0048437	floral organ development		0		0		0		0		0		0	0.0491937	1	0.0368078	1	0.0290245	1	0.0308398	1
	GO:0048438	floral whorl development		0		0		0		0		0		0	0.0372109	1	0.0315547	1	0.0072365	1	0.0030802	1
	GO:0048467	gynoecium development		0		0		0		0		0		0		0		0	0.0436365	1	0.0140539	1
	GO:0048507	meristem development		0		0		0		0		0		0	0.00458546	1	0.0112993	1	0.00492008	1	0.00879886	1
	GO:0048513	organ development		0		0		0		0		0		0	6.02049e-06	1	4.31073e-05	1	2.72365e-06	1	1.79154e-05	1
	GO:0048569	post-embryonic organ development		0		0		0		0		0		0	0.0491937	1	0.0368078	1	0.0290245	1	0.0308398	1
	GO:0048645	organ formation		0		0		0		0		0		0		0	0.0157071	1	0.0118172	1	0.00460498	1
	GO:0048864	stem cell development		0		0		0		0		0		0	0.0214513	1	0.0140841	1		0	0.0174893	1
	GO:0006259	DNA metabolic process		0		0		0		0		0		0		0	0.0439002	-1		0		0
	GO:0006807	nitrogen compound metabolic process		0		0		0		0		0		0	4.45134e-05	1		0	2.37893e-05	1		0
	GO:0009739	response to gibberellin stimulus		0		0		0		0		0		0		0		0	0.0436365	1		0
	GO:0022621	shoot system development		0		0		0		0		0		0	0.0491937	1		0	0.0131095	1		0
	GO:0044237	cellular metabolic process		0		0		0		0		0		0	0.000981144	1		0	8.73134e-05	1		0
	GO:0044238	primary metabolic process		0		0		0		0		0		0	0.00325052	1		0	0.000830177	1		0
	GO:0048367	shoot development		0		0		0		0		0		0	0.0491937	1		0	0.0131095	1		0
	GO:0044267	cellular protein metabolic process		0		0		0	0.0224753	-1		0		0		0	0.010987	-1		0		0
	GO:0019538	protein metabolic process		0		0		0	0.0224753	-1		0		0		0	0.010987	-1		0	0.0243387	-1
molecular	GO:0001882	nucleoside binding	0.0432882	1		0		0		0		0		0		0		0		0		0
	GO:0003676	nucleic acid binding		0		0		0		0		0		0	0.000600344	1	0.0448319	1	4.82157e-05	1	0.00973346	1
	GO:0003677	DNA binding		0		0		0		0		0		0	2.66887e-05	1	0.00677289	1	1.20175e-06	1	0.001014	1
	GO:0003700	sequence-specific DNA binding transcription factor activity		0		0	0.010119	1	0.0194123	1		0		0	3.4535e-06	1	1.82484e-06	1	4.58023e-07	1	3.26163e-06	1
	GO:0004871	signal transducer activity	0.00498856	1		0		0		0		0		0		0		0		0		0
	GO:0004872	receptor activity	0.00498856	1		0		0		0		0		0		0		0		0		0
	GO:0004888	transmembrane signaling receptor activity	0.00498856	1		0		0		0		0		0		0		0		0		0
	GO:0005515	protein binding	0.00498856	1		0		0		0		0		0		0		0		0		0
	GO:0043565	sequence-specific DNA binding		0		0		0		0		0		0	0.00707943	1	0.00153208	1	0.000869204	1	0.000137468	1
cellular	GO:0005622	intracellular	2.41566e-05	1		0	0.00117904	1		0		0		0	3.81812e-06	1		0	5.26328e-06	1		0
	GO:0005634	nucleus		0		0	0.0408327	1		0		0		0	1.40881e-08	1	0.0241096	1	7.3055e-09	1	0.00727006	1
	GO:0005737	cytoplasm	4.30115e-05	1	1.8326e-05	-1	0.0267689	1	0.000556733	-1		0		0		0		0		0		0
	GO:0005739	mitochondrion		0		0		0		0		0		0		0	0.0241096	-1		0		0
	GO:0005773	vacuole	0.00639197	1		0		0		0		0		0		0		0		0		0
	GO:0005886	plasma membrane	7.15496e-06	1		0	0.00103743	1		0		0		0		0		0		0		0
	GO:0009507	chloroplast	0.000391194	1	4.82344e-05	-1	0.0349893	1		0		0		0		0		0		0		0
	GO:0009536	plastid	0.000499321	1	3.46733e-05	-1	0.0349893	1		0		0		0		0		0		0		0
	GO:0009579	thylakoid	0.00639197	1		0		0		0		0		0		0		0		0		0
	GO:0012505	endomembrane system		0		0	0.0267689	-1		0		0		0	1.70859e-05	-1		0	3.14382e-05	-1		0
	GO:0016020	membrane	1.29292e-09	1		0	4.34091e-05	1		0		0		0		0		0		0		0
	GO:0031224	intrinsic to membrane	0.0008551	1		0		0		0		0		0		0		0		0		0
	GO:0042651	thylakoid membrane	0.0181217	1		0		0		0		0		0		0		0		0		0
	GO:0043231	intracellular membrane-bounded organelle	3.50311e-05	1		0	0.00186459	1		0		0		0	4.75378e-07	1		0	1.95314e-06	1		0
